# Supplementary material
Source: publisher figshare collection journal article supplement (https://acs.figshare.com/ndownloader/files/10077864)
Supplement: Supplementary file 1 [file 10077864]

 
data_t_a
 
_audit_creation_method            'SHELXL-2014/7'
_shelx_SHELXL_version_number      '2014/7'
_chemical_name_systematic         ?
_chemical_name_common             ?
_chemical_melting_point           ?
_chemical_formula_moiety          'C20 H34 O7, C2 H5 O'
_chemical_formula_sum
 'C22 H39 O8' 
_chemical_formula_weight          431.53

loop_
 _atom_type_symbol
 _atom_type_description
 _atom_type_scat_dispersion_real
 _atom_type_scat_dispersion_imag
 _atom_type_scat_source
 'C'  'C'   0.0181   0.0091
 'International Tables Vol C Tables 4.2.6.8 and 6.1.1.4'
 'H'  'H'   0.0000   0.0000
 'International Tables Vol C Tables 4.2.6.8 and 6.1.1.4'
 'O'  'O'   0.0492   0.0322
 'International Tables Vol C Tables 4.2.6.8 and 6.1.1.4'
 
_space_group_crystal_system       orthorhombic
_space_group_IT_number            19
_space_group_name_H-M_alt         'P 21 21 21'
_space_group_name_Hall            'P 2ac 2ab'
 
_shelx_space_group_comment
;
The symmetry employed for this shelxl refinement is uniquely defined
by the following loop, which should always be used as a source of
symmetry information in preference to the above space-group names.
They are only intended as comments.
;
 
loop_
 _space_group_symop_operation_xyz
 'x, y, z'
 '-x+1/2, -y, z+1/2'
 '-x, y+1/2, -z+1/2'
 'x+1/2, -y+1/2, -z'
 
_cell_length_a                    10.3826(3)
_cell_length_b                    10.5016(3)
_cell_length_c                    19.1653(6)
_cell_angle_alpha                 90
_cell_angle_beta                  90
_cell_angle_gamma                 90
_cell_volume                      2089.67(11)
_cell_formula_units_Z             4
_cell_measurement_temperature     173(2)
_cell_measurement_reflns_used     9869
_cell_measurement_theta_min       4.61
_cell_measurement_theta_max       68.25
 
_exptl_crystal_description        block
_exptl_crystal_colour             colorless
_exptl_crystal_density_meas       ?
_exptl_crystal_density_method     ?
_exptl_crystal_density_diffrn     1.372          
_exptl_crystal_F_000              940
_exptl_transmission_factor_min    ?
_exptl_transmission_factor_max    ?
_exptl_crystal_size_max           0.200
_exptl_crystal_size_mid           0.200
_exptl_crystal_size_min           0.200
_exptl_absorpt_coefficient_mu     0.849
_shelx_estimated_absorpt_T_min    0.849
_shelx_estimated_absorpt_T_max    0.849
_exptl_absorpt_correction_type    none
_exptl_absorpt_correction_T_min   ?
_exptl_absorpt_correction_T_max   ?
_exptl_absorpt_process_details    ?
_exptl_absorpt_special_details    ?
_diffrn_ambient_temperature       173(2)
_diffrn_radiation_wavelength      1.54178
_diffrn_radiation_type            CuK\a
_diffrn_source                    ?
_diffrn_measurement_device_type   'D8 VENTURE CMOS photon 100'
_diffrn_measurement_method        '\f and \w scans'
_diffrn_detector_area_resol_mean  ?
_diffrn_reflns_number             18724
_diffrn_reflns_av_unetI/netI      0.0161
_diffrn_reflns_av_R_equivalents   0.0238
_diffrn_reflns_limit_h_min        -12
_diffrn_reflns_limit_h_max        12
_diffrn_reflns_limit_k_min        -12
_diffrn_reflns_limit_k_max        12
_diffrn_reflns_limit_l_min        -23
_diffrn_reflns_limit_l_max        23
_diffrn_reflns_theta_min          4.614
_diffrn_reflns_theta_max          68.261
_diffrn_reflns_theta_full         67.679
_diffrn_measured_fraction_theta_max   0.997
_diffrn_measured_fraction_theta_full  0.997
_diffrn_reflns_Laue_measured_fraction_max    0.997
_diffrn_reflns_Laue_measured_fraction_full   0.997
_diffrn_reflns_point_group_measured_fraction_max   0.998
_diffrn_reflns_point_group_measured_fraction_full  0.998
_reflns_number_total              3822
_reflns_number_gt                 3748
_reflns_threshold_expression      'I > 2\s(I)'
_reflns_Friedel_coverage          0.747
_reflns_Friedel_fraction_max      0.999
_reflns_Friedel_fraction_full     0.999
 
_reflns_special_details
;
 Reflections were merged by SHELXL according to the crystal
 class for the calculation of statistics and refinement.
 
 _reflns_Friedel_fraction is defined as the number of unique
 Friedel pairs measured divided by the number that would be
 possible theoretically, ignoring centric projections and
 systematic absences.
;
 
_computing_data_collection        ?
_computing_cell_refinement        ?
_computing_data_reduction         ?
_computing_structure_solution     ?
_computing_structure_refinement 'SHELXL-2014/7 (Sheldrick, 2014)'
_computing_molecular_graphics     ?
_computing_publication_material   ?
_refine_special_details           ?
_refine_ls_structure_factor_coef  Fsqd
_refine_ls_matrix_type            full
_refine_ls_weighting_scheme       calc
_refine_ls_weighting_details
'w=1/[\s^2^(Fo^2^)+(0.0725P)^2^+1.1123P] where P=(Fo^2^+2Fc^2^)/3'
_atom_sites_solution_primary      ?
_atom_sites_solution_secondary    ?
_atom_sites_solution_hydrogens    mixed
_refine_ls_hydrogen_treatment     mixed
_refine_ls_extinction_method      none
_refine_ls_extinction_coef        .
_refine_ls_abs_structure_details
;
 Flack x determined using 1581 quotients [(I+)-(I-)]/[(I+)+(I-)]
 (Parsons, Flack and Wagner, Acta Cryst. B69 (2013) 249-259).
;
_refine_ls_abs_structure_Flack    0.00(3)
_chemical_absolute_configuration  ad
_refine_ls_number_reflns          3822
_refine_ls_number_parameters      301
_refine_ls_number_restraints      0
_refine_ls_R_factor_all           0.0377
_refine_ls_R_factor_gt            0.0369
_refine_ls_wR_factor_ref          0.1059
_refine_ls_wR_factor_gt           0.1048
_refine_ls_goodness_of_fit_ref    1.008
_refine_ls_restrained_S_all       1.008
_refine_ls_shift/su_max           0.000
_refine_ls_shift/su_mean          0.000
 
loop_
 _atom_site_label
 _atom_site_type_symbol
 _atom_site_fract_x
 _atom_site_fract_y
 _atom_site_fract_z
 _atom_site_U_iso_or_equiv
 _atom_site_adp_type
 _atom_site_occupancy
 _atom_site_site_symmetry_order  
 _atom_site_calc_flag
 _atom_site_refinement_flags_posn
 _atom_site_refinement_flags_adp
 _atom_site_refinement_flags_occupancy
 _atom_site_disorder_assembly
 _atom_site_disorder_group
O1 O 1.00298(18) 0.7723(2) 0.72064(11) 0.0215(4) Uani 1 1 d . . . . .
C1 C 0.8174(2) 0.6712(2) 0.66539(13) 0.0128(5) Uani 1 1 d . . . . .
H1 H 0.8886 0.6770 0.6304 0.015 Uiso 1 1 calc R U . . .
O2 O 0.67025(18) 0.82348(19) 0.77942(10) 0.0187(4) Uani 1 1 d . . . . .
H2A H 0.6874(12) 0.774(4) 0.807(2) 0.028 Uiso 1 1 calc R U . . .
C23 C 0.2642(19) 0.6360(16) 0.6348(7) 0.269(11) Uani 1 1 d . . . . .
H23A H 0.2950 0.6941 0.5977 0.323 Uiso 1 1 calc R U . . .
H23B H 0.2647 0.6885 0.6777 0.323 Uiso 1 1 calc R U . . .
C22 C 0.3744(3) 0.5573(3) 0.64540(19) 0.0341(7) Uani 1 1 d . . . . .
H22A H 0.3665 0.4673 0.6426 0.041 Uiso 1 1 calc R U . . .
H22B H 0.4556 0.5949 0.6552 0.041 Uiso 1 1 calc R U . . .
C2 C 0.8703(2) 0.7393(2) 0.73182(13) 0.0153(5) Uani 1 1 d . . . . .
H2 H 0.8620 0.6822 0.7734 0.018 Uiso 1 1 calc R U . . .
O3 O 0.58217(17) 0.71950(18) 0.65860(10) 0.0167(4) Uani 1 1 d . . . . .
C3 C 0.7843(3) 0.8569(2) 0.74068(13) 0.0152(5) Uani 1 1 d . . . . .
H3 H 0.8320 0.9283 0.7636 0.018 Uiso 1 1 calc R U . . .
O4 O 0.62941(19) 0.85161(18) 0.52941(10) 0.0184(4) Uani 1 1 d . . . . .
H4 H 0.626(3) 0.847(2) 0.491(2) 0.028 Uiso 1 1 calc R U . . .
C4 C 0.7420(3) 0.8928(2) 0.66630(13) 0.0150(5) Uani 1 1 d . . . . .
O7 O 0.8006(2) 0.3462(2) 0.38672(10) 0.0222(4) Uani 1 1 d . . . . .
C7 C 0.6589(2) 0.6249(2) 0.52614(13) 0.0148(5) Uani 1 1 d . . . . .
H7A H 0.6502 0.6364 0.4751 0.018 Uiso 1 1 calc R U . . .
H7B H 0.5710 0.6118 0.5448 0.018 Uiso 1 1 calc R U . . .
O6 O 0.8808(2) 0.56648(18) 0.44628(10) 0.0176(4) Uani 1 1 d . . . . .
C6 C 0.7084(2) 0.7505(2) 0.55598(13) 0.0133(5) Uani 1 1 d . . . . .
H6 H 0.7987 0.7639 0.5393 0.016 Uiso 1 1 calc R U . . .
O5 O 0.92352(19) 0.47705(18) 0.69178(10) 0.0170(4) Uani 1 1 d . . . . .
H5 H 0.575(5) 0.747(5) 0.705(3) 0.058(14) Uiso 1 1 d . . . . .
C5 C 0.7076(2) 0.7578(2) 0.63575(13) 0.0126(5) Uani 1 1 d . . . . .
C8 C 0.7338(2) 0.5006(2) 0.53797(12) 0.0123(5) Uani 1 1 d . . . . .
O8 O 0.1321(2) 0.6297(2) 0.62003(11) 0.0286(5) Uani 1 1 d . . . . .
H8A H 0.090(2) 0.684(4) 0.648(2) 0.043 Uiso 1 1 calc R U . . .
H8 H 1.025(4) 0.832(4) 0.747(2) 0.034(10) Uiso 1 1 d . . . . .
C9 C 0.7303(2) 0.4509(2) 0.61453(13) 0.0132(5) Uani 1 1 d . . . . .
H9 H 0.6368 0.4459 0.6269 0.016 Uiso 1 1 calc R U . . .
C10 C 0.7952(2) 0.5267(2) 0.67617(13) 0.0142(5) Uani 1 1 d . . . . .
H10 H 0.951(4) 0.599(3) 0.4468(17) 0.014(8) Uiso 1 1 d . . . . .
C11 C 0.7793(2) 0.3118(2) 0.61641(14) 0.0153(5) Uani 1 1 d . . . . .
H11A H 0.7958 0.2872 0.6655 0.018 Uiso 1 1 calc R U . . .
H11B H 0.7111 0.2550 0.5980 0.018 Uiso 1 1 calc R U . . .
H11 H 0.830(5) 0.419(5) 0.386(2) 0.046(13) Uiso 1 1 d . . . . .
C12 C 0.9031(3) 0.2917(2) 0.57363(13) 0.0162(5) Uani 1 1 d . . . . .
H12A H 0.9772 0.3260 0.6002 0.019 Uiso 1 1 calc R U . . .
H12B H 0.9173 0.1993 0.5671 0.019 Uiso 1 1 calc R U . . .
H12 H 0.982(4) 0.518(4) 0.669(2) 0.036(11) Uiso 1 1 d . . . . .
C13 C 0.8980(2) 0.3563(2) 0.50202(13) 0.0147(5) Uani 1 1 d . . . . .
H13 H 0.9793 0.3409 0.4754 0.018 Uiso 1 1 calc R U . . .
C14 C 0.8740(2) 0.4996(2) 0.51151(12) 0.0132(5) Uani 1 1 d . . . . .
H14 H 0.9341 0.5371 0.5467 0.016 Uiso 1 1 calc R U . . .
C15 C 0.6699(2) 0.3975(2) 0.48957(13) 0.0154(5) Uani 1 1 d . . . . .
H15A H 0.6091 0.3445 0.5167 0.018 Uiso 1 1 calc R U . . .
H15B H 0.6219 0.4391 0.4512 0.018 Uiso 1 1 calc R U . . .
C16 C 0.7799(3) 0.3138(2) 0.45961(13) 0.0164(5) Uani 1 1 d . . . . .
C17 C 0.7551(3) 0.1708(3) 0.45865(15) 0.0209(6) Uani 1 1 d . . . . .
H17A H 0.6893 0.1511 0.4236 0.031 Uiso 1 1 calc R U . . .
H17B H 0.7251 0.1432 0.5047 0.031 Uiso 1 1 calc R U . . .
H17C H 0.8351 0.1260 0.4470 0.031 Uiso 1 1 calc R U . . .
C18 C 0.8553(3) 0.9546(3) 0.62741(15) 0.0190(5) Uani 1 1 d . . . . .
H18A H 0.9263 0.8935 0.6238 0.028 Uiso 1 1 calc R U . . .
H18B H 0.8843 1.0301 0.6531 0.028 Uiso 1 1 calc R U . . .
H18C H 0.8276 0.9798 0.5805 0.028 Uiso 1 1 calc R U . . .
C19 C 0.6307(3) 0.9885(3) 0.66815(14) 0.0192(5) Uani 1 1 d . . . . .
H19A H 0.6134 1.0193 0.6208 0.029 Uiso 1 1 calc R U . . .
H19B H 0.6540 1.0605 0.6981 0.029 Uiso 1 1 calc R U . . .
H19C H 0.5534 0.9469 0.6867 0.029 Uiso 1 1 calc R U . . .
C20 C 0.7177(3) 0.4939(3) 0.74199(13) 0.0193(6) Uani 1 1 d . . . . .
H20A H 0.6358 0.5402 0.7414 0.029 Uiso 1 1 calc R U . . .
H20B H 0.7671 0.5183 0.7835 0.029 Uiso 1 1 calc R U . . .
H20C H 0.7008 0.4021 0.7431 0.029 Uiso 1 1 calc R U . . .
 
loop_
 _atom_site_aniso_label
 _atom_site_aniso_U_11
 _atom_site_aniso_U_22
 _atom_site_aniso_U_33
 _atom_site_aniso_U_23
 _atom_site_aniso_U_13
 _atom_site_aniso_U_12
O1 0.0151(9) 0.0230(10) 0.0265(10) -0.0098(9) -0.0037(8) -0.0009(8)
C1 0.0143(11) 0.0121(12) 0.0122(11) -0.0005(9) -0.0010(9) 0.0003(10)
O2 0.0203(9) 0.0214(9) 0.0145(9) 0.0033(8) 0.0022(7) 0.0028(8)
C23 0.38(2) 0.30(2) 0.126(10) 0.051(11) 0.034(13) 0.24(2)
C22 0.0245(15) 0.0293(16) 0.048(2) 0.0061(15) -0.0076(14) -0.0077(13)
C2 0.0160(12) 0.0156(12) 0.0143(11) -0.0014(9) -0.0020(10) 0.0020(10)
O3 0.0136(8) 0.0186(9) 0.0179(9) -0.0007(7) 0.0014(7) -0.0011(7)
C3 0.0160(12) 0.0146(12) 0.0148(12) -0.0017(10) -0.0010(10) 0.0006(10)
O4 0.0249(10) 0.0170(9) 0.0134(8) 0.0020(7) -0.0038(8) 0.0075(8)
C4 0.0171(12) 0.0134(12) 0.0144(12) 0.0001(9) -0.0016(10) 0.0007(10)
O7 0.0336(11) 0.0197(10) 0.0134(9) -0.0021(8) 0.0001(8) 0.0003(9)
C7 0.0136(11) 0.0165(12) 0.0144(12) -0.0007(9) -0.0025(9) 0.0027(10)
O6 0.0180(10) 0.0204(9) 0.0144(8) 0.0042(7) 0.0020(7) -0.0031(8)
C6 0.0143(11) 0.0134(12) 0.0121(11) 0.0014(9) -0.0011(9) 0.0026(9)
O5 0.0165(9) 0.0157(9) 0.0189(9) 0.0027(7) -0.0043(7) 0.0031(8)
C5 0.0127(11) 0.0136(12) 0.0116(12) 0.0006(9) 0.0000(9) -0.0010(9)
C8 0.0130(11) 0.0121(11) 0.0119(11) -0.0011(9) -0.0029(9) -0.0007(9)
O8 0.0271(11) 0.0340(12) 0.0247(11) -0.0010(9) 0.0011(9) 0.0054(9)
C9 0.0120(11) 0.0134(12) 0.0141(12) -0.0008(10) 0.0008(9) -0.0002(9)
C10 0.0152(12) 0.0142(12) 0.0133(11) 0.0013(9) -0.0026(10) 0.0024(10)
C11 0.0186(12) 0.0121(12) 0.0153(12) 0.0014(9) -0.0001(10) -0.0012(10)
C12 0.0188(13) 0.0140(12) 0.0159(12) 0.0009(10) -0.0008(10) 0.0048(10)
C13 0.0139(12) 0.0163(13) 0.0137(12) -0.0011(10) 0.0014(9) 0.0025(9)
C14 0.0130(11) 0.0147(12) 0.0117(11) 0.0021(9) 0.0003(9) 0.0001(10)
C15 0.0150(12) 0.0145(12) 0.0167(12) -0.0027(10) -0.0025(10) -0.0011(10)
C16 0.0210(13) 0.0156(13) 0.0126(12) -0.0008(9) -0.0015(10) 0.0011(10)
C17 0.0257(14) 0.0153(12) 0.0217(13) -0.0028(10) -0.0011(11) 0.0000(11)
C18 0.0219(13) 0.0152(12) 0.0200(12) 0.0013(10) 0.0008(11) -0.0046(10)
C19 0.0226(13) 0.0144(12) 0.0206(13) 0.0002(10) -0.0016(11) 0.0049(11)
C20 0.0263(14) 0.0158(12) 0.0158(12) 0.0009(10) 0.0049(11) -0.0019(12)
 
_geom_special_details
;
 All esds (except the esd in the dihedral angle between two l.s. planes)
 are estimated using the full covariance matrix.  The cell esds are taken
 into account individually in the estimation of esds in distances, angles
 and torsion angles; correlations between esds in cell parameters are only
 used when they are defined by crystal symmetry.  An approximate (isotropic)
 treatment of cell esds is used for estimating esds involving l.s. planes.
;
 
loop_
 _geom_bond_atom_site_label_1
 _geom_bond_atom_site_label_2
 _geom_bond_distance
 _geom_bond_site_symmetry_2
 _geom_bond_publ_flag
O1 C2 1.437(3) . ?
O1 H8 0.84(5) . ?
C1 C10 1.548(3) . ?
C1 C2 1.560(3) . ?
C1 C5 1.565(3) . ?
C1 H1 1.0000 . ?
O2 C3 1.441(3) . ?
O2 H2A 0.76(4) . ?
C23 C22 1.426(14) . ?
C23 O8 1.40(2) . ?
C23 H23A 0.9900 . ?
C23 H23B 0.9900 . ?
C22 H22A 0.9500 . ?
C22 H22B 0.9500 . ?
C2 C3 1.534(3) . ?
C2 H2 1.0000 . ?
O3 C5 1.432(3) . ?
O3 H5 0.94(5) . ?
C3 C4 1.539(3) . ?
C3 H3 1.0000 . ?
O4 C6 1.435(3) . ?
O4 H4 0.74(4) . ?
C4 C19 1.532(4) . ?
C4 C18 1.537(4) . ?
C4 C5 1.575(3) . ?
O7 C16 1.454(3) . ?
O7 H11 0.83(5) . ?
C7 C6 1.527(3) . ?
C7 C8 1.535(3) . ?
C7 H7A 0.9900 . ?
C7 H7B 0.9900 . ?
O6 C14 1.436(3) . ?
O6 H10 0.81(4) . ?
C6 C5 1.531(3) . ?
C6 H6 1.0000 . ?
O5 C10 1.462(3) . ?
O5 H12 0.86(5) . ?
C8 C14 1.542(3) . ?
C8 C9 1.558(3) . ?
C8 C15 1.573(3) . ?
O8 H8A 0.89(5) . ?
C9 C11 1.548(3) . ?
C9 C10 1.576(3) . ?
C9 H9 1.0000 . ?
C10 C20 1.535(4) . ?
C11 C12 1.539(4) . ?
C11 H11A 0.9900 . ?
C11 H11B 0.9900 . ?
C12 C13 1.532(3) . ?
C12 H12A 0.9900 . ?
C12 H12B 0.9900 . ?
C13 C14 1.536(3) . ?
C13 C16 1.538(3) . ?
C13 H13 1.0000 . ?
C14 H14 1.0000 . ?
C15 C16 1.551(4) . ?
C15 H15A 0.9900 . ?
C15 H15B 0.9900 . ?
C16 C17 1.524(4) . ?
C17 H17A 0.9800 . ?
C17 H17B 0.9800 . ?
C17 H17C 0.9800 . ?
C18 H18A 0.9800 . ?
C18 H18B 0.9800 . ?
C18 H18C 0.9800 . ?
C19 H19A 0.9800 . ?
C19 H19B 0.9800 . ?
C19 H19C 0.9800 . ?
C20 H20A 0.9800 . ?
C20 H20B 0.9800 . ?
C20 H20C 0.9800 . ?
 
loop_
 _geom_angle_atom_site_label_1
 _geom_angle_atom_site_label_2
 _geom_angle_atom_site_label_3
 _geom_angle
 _geom_angle_site_symmetry_1
 _geom_angle_site_symmetry_3
 _geom_angle_publ_flag
C2 O1 H8 110(3) . . ?
C10 C1 C2 113.1(2) . . ?
C10 C1 C5 120.6(2) . . ?
C2 C1 C5 106.6(2) . . ?
C10 C1 H1 105.0 . . ?
C2 C1 H1 105.0 . . ?
C5 C1 H1 105.0 . . ?
C3 O2 H2A 109.5 . . ?
C22 C23 O8 141.8(15) . . ?
C22 C23 H23A 101.5 . . ?
O8 C23 H23A 101.5 . . ?
C22 C23 H23B 101.5 . . ?
O8 C23 H23B 101.5 . . ?
H23A C23 H23B 104.6 . . ?
C23 C22 H22A 120.0 . . ?
C23 C22 H22B 120.0 . . ?
H22A C22 H22B 120.0 . . ?
O1 C2 C3 112.3(2) . . ?
O1 C2 C1 109.1(2) . . ?
C3 C2 C1 104.8(2) . . ?
O1 C2 H2 110.2 . . ?
C3 C2 H2 110.2 . . ?
C1 C2 H2 110.2 . . ?
C5 O3 H5 106(3) . . ?
O2 C3 C2 109.8(2) . . ?
O2 C3 C4 107.6(2) . . ?
C2 C3 C4 105.1(2) . . ?
O2 C3 H3 111.4 . . ?
C2 C3 H3 111.4 . . ?
C4 C3 H3 111.4 . . ?
C6 O4 H4 109.5 . . ?
C19 C4 C18 108.2(2) . . ?
C19 C4 C3 110.8(2) . . ?
C18 C4 C3 109.5(2) . . ?
C19 C4 C5 115.4(2) . . ?
C18 C4 C5 111.9(2) . . ?
C3 C4 C5 100.88(19) . . ?
C16 O7 H11 106(3) . . ?
C6 C7 C8 120.6(2) . . ?
C6 C7 H7A 107.2 . . ?
C8 C7 H7A 107.2 . . ?
C6 C7 H7B 107.2 . . ?
C8 C7 H7B 107.2 . . ?
H7A C7 H7B 106.8 . . ?
C14 O6 H10 104(2) . . ?
O4 C6 C7 108.29(19) . . ?
O4 C6 C5 108.31(19) . . ?
C7 C6 C5 114.5(2) . . ?
O4 C6 H6 108.5 . . ?
C7 C6 H6 108.5 . . ?
C5 C6 H6 108.5 . . ?
C10 O5 H12 111(3) . . ?
O3 C5 C6 107.24(19) . . ?
O3 C5 C1 112.8(2) . . ?
C6 C5 C1 109.24(19) . . ?
O3 C5 C4 110.2(2) . . ?
C6 C5 C4 114.5(2) . . ?
C1 C5 C4 102.91(19) . . ?
C7 C8 C14 115.8(2) . . ?
C7 C8 C9 114.3(2) . . ?
C14 C8 C9 109.22(19) . . ?
C7 C8 C15 106.55(19) . . ?
C14 C8 C15 101.49(19) . . ?
C9 C8 C15 108.4(2) . . ?
C23 O8 H8A 109.5 . . ?
C11 C9 C8 109.3(2) . . ?
C11 C9 C10 108.6(2) . . ?
C8 C9 C10 121.8(2) . . ?
C11 C9 H9 105.3 . . ?
C8 C9 H9 105.3 . . ?
C10 C9 H9 105.3 . . ?
O5 C10 C20 103.2(2) . . ?
O5 C10 C1 104.0(2) . . ?
C20 C10 C1 114.1(2) . . ?
O5 C10 C9 111.3(2) . . ?
C20 C10 C9 106.2(2) . . ?
C1 C10 C9 117.3(2) . . ?
C12 C11 C9 113.0(2) . . ?
C12 C11 H11A 109.0 . . ?
C9 C11 H11A 109.0 . . ?
C12 C11 H11B 109.0 . . ?
C9 C11 H11B 109.0 . . ?
H11A C11 H11B 107.8 . . ?
C13 C12 C11 112.8(2) . . ?
C13 C12 H12A 109.0 . . ?
C11 C12 H12A 109.0 . . ?
C13 C12 H12B 109.0 . . ?
C11 C12 H12B 109.0 . . ?
H12A C12 H12B 107.8 . . ?
C12 C13 C14 109.5(2) . . ?
C12 C13 C16 111.9(2) . . ?
C14 C13 C16 102.6(2) . . ?
C12 C13 H13 110.9 . . ?
C14 C13 H13 110.9 . . ?
C16 C13 H13 110.9 . . ?
O6 C14 C13 111.6(2) . . ?
O6 C14 C8 109.21(19) . . ?
C13 C14 C8 101.50(19) . . ?
O6 C14 H14 111.4 . . ?
C13 C14 H14 111.4 . . ?
C8 C14 H14 111.4 . . ?
C16 C15 C8 107.4(2) . . ?
C16 C15 H15A 110.2 . . ?
C8 C15 H15A 110.2 . . ?
C16 C15 H15B 110.2 . . ?
C8 C15 H15B 110.2 . . ?
H15A C15 H15B 108.5 . . ?
O7 C16 C17 104.1(2) . . ?
O7 C16 C13 108.8(2) . . ?
C17 C16 C13 115.3(2) . . ?
O7 C16 C15 109.4(2) . . ?
C17 C16 C15 116.0(2) . . ?
C13 C16 C15 103.1(2) . . ?
C16 C17 H17A 109.5 . . ?
C16 C17 H17B 109.5 . . ?
H17A C17 H17B 109.5 . . ?
C16 C17 H17C 109.5 . . ?
H17A C17 H17C 109.5 . . ?
H17B C17 H17C 109.5 . . ?
C4 C18 H18A 109.5 . . ?
C4 C18 H18B 109.5 . . ?
H18A C18 H18B 109.5 . . ?
C4 C18 H18C 109.5 . . ?
H18A C18 H18C 109.5 . . ?
H18B C18 H18C 109.5 . . ?
C4 C19 H19A 109.5 . . ?
C4 C19 H19B 109.5 . . ?
H19A C19 H19B 109.5 . . ?
C4 C19 H19C 109.5 . . ?
H19A C19 H19C 109.5 . . ?
H19B C19 H19C 109.5 . . ?
C10 C20 H20A 109.5 . . ?
C10 C20 H20B 109.5 . . ?
H20A C20 H20B 109.5 . . ?
C10 C20 H20C 109.5 . . ?
H20A C20 H20C 109.5 . . ?
H20B C20 H20C 109.5 . . ?
 
loop_
 _geom_torsion_atom_site_label_1
 _geom_torsion_atom_site_label_2
 _geom_torsion_atom_site_label_3
 _geom_torsion_atom_site_label_4
 _geom_torsion
 _geom_torsion_site_symmetry_1
 _geom_torsion_site_symmetry_2
 _geom_torsion_site_symmetry_3
 _geom_torsion_site_symmetry_4
 _geom_torsion_publ_flag
C10 C1 C2 O1 108.1(2) . . . . ?
C5 C1 C2 O1 -117.0(2) . . . . ?
C10 C1 C2 C3 -131.4(2) . . . . ?
C5 C1 C2 C3 3.5(3) . . . . ?
O1 C2 C3 O2 -156.0(2) . . . . ?
C1 C2 C3 O2 85.8(2) . . . . ?
O1 C2 C3 C4 88.6(2) . . . . ?
C1 C2 C3 C4 -29.7(3) . . . . ?
O2 C3 C4 C19 49.5(3) . . . . ?
C2 C3 C4 C19 166.5(2) . . . . ?
O2 C3 C4 C18 168.7(2) . . . . ?
C2 C3 C4 C18 -74.3(2) . . . . ?
O2 C3 C4 C5 -73.2(2) . . . . ?
C2 C3 C4 C5 43.8(2) . . . . ?
C8 C7 C6 O4 172.6(2) . . . . ?
C8 C7 C6 C5 -66.4(3) . . . . ?
O4 C6 C5 O3 70.9(2) . . . . ?
C7 C6 C5 O3 -50.1(3) . . . . ?
O4 C6 C5 C1 -166.5(2) . . . . ?
C7 C6 C5 C1 72.5(3) . . . . ?
O4 C6 C5 C4 -51.7(3) . . . . ?
C7 C6 C5 C4 -172.7(2) . . . . ?
C10 C1 C5 O3 35.0(3) . . . . ?
C2 C1 C5 O3 -95.7(2) . . . . ?
C10 C1 C5 C6 -84.1(3) . . . . ?
C2 C1 C5 C6 145.1(2) . . . . ?
C10 C1 C5 C4 153.8(2) . . . . ?
C2 C1 C5 C4 23.0(2) . . . . ?
C19 C4 C5 O3 -39.2(3) . . . . ?
C18 C4 C5 O3 -163.5(2) . . . . ?
C3 C4 C5 O3 80.2(2) . . . . ?
C19 C4 C5 C6 81.8(3) . . . . ?
C18 C4 C5 C6 -42.5(3) . . . . ?
C3 C4 C5 C6 -158.8(2) . . . . ?
C19 C4 C5 C1 -159.8(2) . . . . ?
C18 C4 C5 C1 75.9(2) . . . . ?
C3 C4 C5 C1 -40.4(2) . . . . ?
C6 C7 C8 C14 -58.1(3) . . . . ?
C6 C7 C8 C9 70.3(3) . . . . ?
C6 C7 C8 C15 -170.1(2) . . . . ?
C7 C8 C9 C11 166.4(2) . . . . ?
C14 C8 C9 C11 -62.0(2) . . . . ?
C15 C8 C9 C11 47.8(2) . . . . ?
C7 C8 C9 C10 -65.7(3) . . . . ?
C14 C8 C9 C10 65.9(3) . . . . ?
C15 C8 C9 C10 175.7(2) . . . . ?
C2 C1 C10 O5 -62.0(2) . . . . ?
C5 C1 C10 O5 170.1(2) . . . . ?
C2 C1 C10 C20 49.7(3) . . . . ?
C5 C1 C10 C20 -78.2(3) . . . . ?
C2 C1 C10 C9 174.7(2) . . . . ?
C5 C1 C10 C9 46.8(3) . . . . ?
C11 C9 C10 O5 31.0(3) . . . . ?
C8 C9 C10 O5 -97.3(3) . . . . ?
C11 C9 C10 C20 -80.6(2) . . . . ?
C8 C9 C10 C20 151.1(2) . . . . ?
C11 C9 C10 C1 150.5(2) . . . . ?
C8 C9 C10 C1 22.3(3) . . . . ?
C8 C9 C11 C12 45.9(3) . . . . ?
C10 C9 C11 C12 -89.1(2) . . . . ?
C9 C11 C12 C13 -44.8(3) . . . . ?
C11 C12 C13 C14 57.9(3) . . . . ?
C11 C12 C13 C16 -55.1(3) . . . . ?
C12 C13 C14 O6 174.38(19) . . . . ?
C16 C13 C14 O6 -66.7(2) . . . . ?
C12 C13 C14 C8 -69.4(2) . . . . ?
C16 C13 C14 C8 49.5(2) . . . . ?
C7 C8 C14 O6 -38.8(3) . . . . ?
C9 C8 C14 O6 -169.56(19) . . . . ?
C15 C8 C14 O6 76.2(2) . . . . ?
C7 C8 C14 C13 -156.7(2) . . . . ?
C9 C8 C14 C13 72.5(2) . . . . ?
C15 C8 C14 C13 -41.8(2) . . . . ?
C7 C8 C15 C16 141.3(2) . . . . ?
C14 C8 C15 C16 19.7(2) . . . . ?
C9 C8 C15 C16 -95.2(2) . . . . ?
C12 C13 C16 O7 -162.8(2) . . . . ?
C14 C13 C16 O7 80.0(2) . . . . ?
C12 C13 C16 C17 -46.4(3) . . . . ?
C14 C13 C16 C17 -163.6(2) . . . . ?
C12 C13 C16 C15 81.1(2) . . . . ?
C14 C13 C16 C15 -36.1(2) . . . . ?
C8 C15 C16 O7 -105.7(2) . . . . ?
C8 C15 C16 C17 136.9(2) . . . . ?
C8 C15 C16 C13 9.9(3) . . . . ?
 
_refine_diff_density_max    0.481
_refine_diff_density_min   -0.635
_refine_diff_density_rms    0.058

_shelx_res_file
;

    t_a.res created by SHELXL-2014/7


TITL t_a.res in P2(1)2(1)2(1)
REM Old TITL t in P2(1)2(1)2(1)

REM SHELXT solution in P2(1)2(1)2(1)
REM R1 0.097,  Rweak 0.028,  Alpha 0.002,  Orientation as input
REM Flack x = -0.007 ( 0.032 ) from Parsons' quotients
REM Formula found by SHELXT:  C20 O9

CELL  1.54178  10.3826  10.5016  19.1653   90.000   90.000   90.000
ZERR    4.000   0.0003   0.0003   0.0006    0.000    0.000    0.000
LATT -1
SYMM 1/2-X, -Y, 1/2+Z
SYMM -X, 1/2+Y, 1/2-Z
SYMM 1/2+X, 1/2-Y, -Z
SFAC C H O
UNIT 88 156 32
TEMP -100.150
L.S. 50
ACTA
SIZE 0.20 0.20 0.20
CONF
BOND $H
LIST 6
FMAP 2
PLAN 20
REM #####
REM #####
REM #####
REM #####
REM #####
REM #####
REM #####
REM #####
WGHT    0.072500    1.112300
FVAR       0.99165
O1    3    1.002978    0.772311    0.720642    11.00000    0.01506    0.02296 =
         0.02653   -0.00980   -0.00375   -0.00094
C1    1    0.817367    0.671206    0.665392    11.00000    0.01426    0.01208 =
         0.01217   -0.00050   -0.00099    0.00027
AFIX  13
H1    2    0.888556    0.677029    0.630392    11.00000   -1.20000
AFIX   0
O2    3    0.670246    0.823478    0.779418    11.00000    0.02034    0.02138 =
         0.01445    0.00331    0.00225    0.00281
AFIX 148
H2A   2    0.687381    0.774253    0.807248    11.00000   -1.50000
AFIX   0
C23   1    0.264152    0.636028    0.634820    11.00000    0.38057    0.30003 =
         0.12617    0.05149    0.03390    0.23740
AFIX  23
H23A  2    0.294966    0.694094    0.597707    11.00000   -1.20000
H23B  2    0.264702    0.688490    0.677737    11.00000   -1.20000
AFIX   0
C22   1    0.374366    0.557306    0.645396    11.00000    0.02449    0.02934 =
         0.04849    0.00611   -0.00762   -0.00766
AFIX  93
H22A  2    0.366529    0.467317    0.642635    11.00000   -1.20000
H22B  2    0.455617    0.594857    0.655204    11.00000   -1.20000
AFIX   0
C2    1    0.870255    0.739290    0.731823    11.00000    0.01602    0.01555 =
         0.01430   -0.00138   -0.00199    0.00205
AFIX  13
H2    2    0.862048    0.682228    0.773358    11.00000   -1.20000
AFIX   0
O3    3    0.582166    0.719495    0.658602    11.00000    0.01356    0.01856 =
         0.01788   -0.00068    0.00141   -0.00107
C3    1    0.784295    0.856930    0.740684    11.00000    0.01604    0.01459 =
         0.01484   -0.00171   -0.00097    0.00059
AFIX  13
H3    2    0.832026    0.928332    0.763556    11.00000   -1.20000
AFIX   0
O4    3    0.629411    0.851609    0.529410    11.00000    0.02492    0.01695 =
         0.01341    0.00199   -0.00385    0.00748
AFIX 148
H4    2    0.626169    0.847181    0.490749    11.00000   -1.50000
AFIX   0
C4    1    0.741957    0.892791    0.666299    11.00000    0.01709    0.01345 =
         0.01442    0.00006   -0.00156    0.00073
O7    3    0.800559    0.346201    0.386719    11.00000    0.03356    0.01974 =
         0.01341   -0.00206    0.00007    0.00034
C7    1    0.658904    0.624867    0.526140    11.00000    0.01362    0.01651 =
         0.01439   -0.00072   -0.00251    0.00271
AFIX  23
H7A   2    0.650232    0.636356    0.475085    11.00000   -1.20000
H7B   2    0.570967    0.611767    0.544776    11.00000   -1.20000
AFIX   0
O6    3    0.880771    0.566479    0.446276    11.00000    0.01805    0.02041 =
         0.01439    0.00424    0.00203   -0.00311
C6    1    0.708431    0.750491    0.555980    11.00000    0.01431    0.01344 =
         0.01210    0.00143   -0.00111    0.00262
AFIX  13
H6    2    0.798666    0.763932    0.539288    11.00000   -1.20000
AFIX   0
O5    3    0.923515    0.477050    0.691780    11.00000    0.01651    0.01566 =
         0.01893    0.00266   -0.00432    0.00307
H5    2    0.574954    0.747247    0.704825    11.00000    0.05793
C5    1    0.707618    0.757792    0.635754    11.00000    0.01275    0.01357 =
         0.01155    0.00057   -0.00002   -0.00096
C8    1    0.733757    0.500637    0.537965    11.00000    0.01298    0.01212 =
         0.01187   -0.00114   -0.00292   -0.00068
O8    3    0.132101    0.629738    0.620032    11.00000    0.02713    0.03405 =
         0.02465   -0.00097    0.00114    0.00536
AFIX 148
H8A   2    0.089684    0.684040    0.647504    11.00000   -1.50000
AFIX   0
H8    2    1.024877    0.831986    0.747416    11.00000    0.03406
C9    1    0.730272    0.450922    0.614530    11.00000    0.01199    0.01345 =
         0.01415   -0.00082    0.00081   -0.00023
AFIX  13
H9    2    0.636844    0.445913    0.626911    11.00000   -1.20000
AFIX   0
C10   1    0.795198    0.526727    0.676167    11.00000    0.01521    0.01417 =
         0.01329    0.00130   -0.00256    0.00241
H10   2    0.951183    0.598731    0.446820    11.00000    0.01434
C11   1    0.779268    0.311770    0.616412    11.00000    0.01856    0.01214 =
         0.01525    0.00140   -0.00013   -0.00119
AFIX  23
H11A  2    0.795818    0.287207    0.665471    11.00000   -1.20000
H11B  2    0.711115    0.255017    0.598025    11.00000   -1.20000
AFIX   0
H11   2    0.829856    0.419368    0.386272    11.00000    0.04643
C12   1    0.903119    0.291731    0.573634    11.00000    0.01879    0.01398 =
         0.01589    0.00087   -0.00081    0.00481
AFIX  23
H12A  2    0.977229    0.326013    0.600160    11.00000   -1.20000
H12B  2    0.917339    0.199281    0.567097    11.00000   -1.20000
AFIX   0
H12   2    0.981937    0.518382    0.669319    11.00000    0.03567
C13   1    0.897999    0.356323    0.502020    11.00000    0.01391    0.01632 =
         0.01373   -0.00110    0.00139    0.00253
AFIX  13
H13   2    0.979316    0.340875    0.475370    11.00000   -1.20000
AFIX   0
C14   1    0.873993    0.499567    0.511514    11.00000    0.01304    0.01474 =
         0.01168    0.00210    0.00034    0.00010
AFIX  13
H14   2    0.934090    0.537064    0.546733    11.00000   -1.20000
AFIX   0
C15   1    0.669915    0.397492    0.489575    11.00000    0.01497    0.01452 =
         0.01666   -0.00265   -0.00252   -0.00107
AFIX  23
H15A  2    0.609076    0.344486    0.516750    11.00000   -1.20000
H15B  2    0.621889    0.439125    0.451221    11.00000   -1.20000
AFIX   0
C16   1    0.779860    0.313845    0.459612    11.00000    0.02103    0.01563 =
         0.01264   -0.00082   -0.00152    0.00105
C17   1    0.755145    0.170767    0.458648    11.00000    0.02574    0.01526 =
         0.02168   -0.00284   -0.00109    0.00001
AFIX 137
H17A  2    0.689332    0.151106    0.423613    11.00000   -1.50000
H17B  2    0.725112    0.143246    0.504720    11.00000   -1.50000
H17C  2    0.835102    0.125968    0.446993    11.00000   -1.50000
AFIX   0
C18   1    0.855323    0.954644    0.627411    11.00000    0.02185    0.01516 =
         0.01996    0.00131    0.00082   -0.00462
AFIX 137
H18A  2    0.926340    0.893522    0.623826    11.00000   -1.50000
H18B  2    0.884334    1.030066    0.653096    11.00000   -1.50000
H18C  2    0.827572    0.979779    0.580517    11.00000   -1.50000
AFIX   0
C19   1    0.630675    0.988493    0.668149    11.00000    0.02257    0.01442 =
         0.02064    0.00023   -0.00162    0.00492
AFIX 137
H19A  2    0.613414    1.019332    0.620802    11.00000   -1.50000
H19B  2    0.653993    1.060475    0.698139    11.00000   -1.50000
H19C  2    0.553421    0.946901    0.686689    11.00000   -1.50000
AFIX   0
C20   1    0.717744    0.493871    0.741992    11.00000    0.02634    0.01581 =
         0.01583    0.00094    0.00488   -0.00193
AFIX 137
H20A  2    0.635829    0.540223    0.741395    11.00000   -1.50000
H20B  2    0.767129    0.518334    0.783456    11.00000   -1.50000
H20C  2    0.700836    0.402086    0.743142    11.00000   -1.50000

AFIX   0
HKLF 4

REM  t_a.res in P2(1)2(1)2(1)
REM R1 =  0.0369 for    3748 Fo > 4sig(Fo)  and  0.0377 for all    3822 data
REM    301 parameters refined using      0 restraints

END

WGHT      0.0611      0.9972

REM Highest difference peak  0.481,  deepest hole -0.635,  1-sigma level  0.058
Q1    1   0.7650  0.8743  0.7014  11.00000  0.05    0.22
Q2    1   0.7376  0.4824  0.5749  11.00000  0.05    0.21
Q3    1   0.7950  0.6015  0.6683  11.00000  0.05    0.21
Q4    1   0.7041  0.5628  0.5341  11.00000  0.05    0.20
Q5    1   0.7705  0.2428  0.4594  11.00000  0.05    0.20
Q6    1   0.7295  0.8288  0.6491  11.00000  0.05    0.20
Q7    1   0.7035  0.7571  0.5972  11.00000  0.05    0.20
Q8    1   0.8373  0.3269  0.4816  11.00000  0.05    0.19
Q9    1   0.7907  0.3194  0.4302  11.00000  0.05    0.17
Q10   1   0.6502  0.0428  0.5253  11.00000  0.05    0.17
Q11   1   0.7022  0.1176  0.5249  11.00000  0.05    0.16
Q12   1   0.7573  0.7025  0.6524  11.00000  0.05    0.16
Q13   1   0.5824  0.3052  0.7616  11.00000  0.05    0.16
Q14   1   0.8043  0.5000  0.5291  11.00000  0.05    0.16
Q15   1   0.8910  0.4260  0.5006  11.00000  0.05    0.16
Q16   1   0.6933  0.0937  0.4794  11.00000  0.05    0.15
Q17   1   0.8924  1.0959  0.7101  11.00000  0.05    0.15
Q18   1   0.6939  0.4040  0.8163  11.00000  0.05    0.15
Q19   1   0.7884  0.4615  0.8021  11.00000  0.05    0.15
Q20   1   0.7438  0.0069  0.5149  11.00000  0.05    0.15
;
_shelx_res_checksum   35396

_shelx_hkl_file
;
   1   0   0    0.60    0.20
  -1   0   0    0.30    0.20
   3   0   0    0.20    0.80
  -3   0   0    0.60    0.40
   3   0   0    0.90    1.10
   4   0   0 4270.07  110.19
  -4   0   0 4371.56  104.89
   4   0   0 4486.55  105.79
   5   0   0    2.00    2.60
   5   0   0    1.60    2.00
   6   0   0  191.18    7.10
  -6   0   0  212.68    8.40
   6   0   0  198.78   12.80
  -7   0   0    4.60    3.00
   8   0   0 1549.84   39.10
  -8   0   0 1526.85   40.10
   9   0   0    0.90    2.10
  -9   0   0   -1.80    3.00
  10   0   0  438.46   12.70
 -10   0   0  443.26   13.80
 -11   0   0    1.80    2.80
  11   0   0    1.60    1.50
  12   0   0  193.18    6.00
  12   0   0  189.08    6.40
   0  -1   0    0.60    0.30
   0  -1   0    0.60    0.30
   0   1   0    1.20    0.30
   0   1   0    1.00    0.30
   0   1   0    0.20    0.30
  -3  -1   0  187.58    5.90
   3   1   0  183.48    7.50
   3   1   0  181.28    6.80
  -4  -1   0   40.30    2.50
   4   1   0   39.70    4.40
   4   1   0   38.10    4.60
  -5  -1   0 2299.47   57.69
  -5  -1   0 2519.65   60.29
   5  -1   0 2292.27   64.69
   5   1   0 2247.38   59.59
   5   1   0 2322.17   62.69
  -5   1   0 2332.57   59.69
   6  -1   0  509.95   22.60
   6  -1   0  501.95   14.30
  -6  -1   0  503.35   15.20
  -6   1   0  516.55   16.40
   6   1   0  504.35   20.30
  -6   1   0  491.75   15.40
   6   1   0  505.15   14.00
  -7  -1   0    3.80    2.70
  -7   1   0   -0.30    3.10
   7   1   0    0.40    1.90
  -8  -1   0  850.71   24.60
   8  -1   0  886.11   23.70
  -8   1   0  902.31   24.70
   8   1   0  887.51   23.40
   9  -1   0 1088.69   28.60
  -9  -1   0 1067.49   29.70
   9   1   0 1080.99   28.20
  -9   1   0 1100.19   29.60
 -10  -1   0    2.70    2.30
  10  -1   0    4.60    1.80
 -10   1   0    6.40    3.20
  10   1   0    2.60    1.60
  10   1   0    6.50    5.80
  11  -1   0   43.00    3.00
 -11  -1   0   37.50    4.20
  11   1   0   44.10    3.50
  11   1   0   40.50    2.90
  12  -1   0   -0.10    1.40
 -12  -1   0    0.10    2.80
  12  -1   0    1.30    1.40
  12   1   0   -0.70    1.40
  12   1   0    0.60    1.60
   0  -2   0  395.26   10.30
   0  -2   0  349.67   10.00
   0   2   0  378.06   10.00
   0   2   0  381.66   10.50
   0   2   0  378.76   10.40
   1  -2   0   23.50    1.30
  -1  -2   0   25.80    2.10
  -1  -2   0   23.80    1.80
   1   2   0   21.40    2.50
   1   2   0   23.50    1.50
   1   2   0   22.10    1.60
  -1   2   0   23.80    1.80
  -1   2   0   18.90    2.40
  -2  -2   0   41.20    2.40
  -2  -2   0   38.90    3.60
   2   2   0   33.90    2.00
   2   2   0   37.50    2.30
  -3  -2   0 1559.14   44.10
  -3  -2   0 1685.63   41.50
   3   2   0 1686.43   42.80
   3   2   0 1683.03   42.50
  -4  -2   0 2116.39   52.79
   4   2   0 2149.58   54.89
   4   2   0 2082.59   54.89
  -5  -2   0  406.66   12.40
  -5  -2   0  374.06   12.30
  -5   2   0  387.06   13.90
   5   2   0  382.76   16.90
   5   2   0  419.96   15.10
   5   2   0  387.36   11.10
   6  -2   0  382.46   20.80
  -6  -2   0  433.16   13.60
  -6  -2   0  428.56   13.20
   6  -2   0  419.86   12.50
  -6   2   0  400.36   14.00
   6   2   0  418.96   11.80
  -6   2   0  425.46   14.80
   6   2   0  419.26   17.20
  -7  -2   0 1650.93   42.40
   7  -2   0 1618.44   41.40
  -7   2   0 1599.64   42.00
  -7   2   0 1649.13   43.80
   7   2   0 1670.13   40.80
  -8  -2   0  435.76   14.30
   8  -2   0  436.16   13.40
   8   2   0  432.56   12.60
   8   2   0  442.46   15.30
   9  -2   0  138.89    6.70
  -9  -2   0  143.69    7.80
   9   2   0  143.19    5.90
   9   2   0  125.99    9.40
 -10  -2   0  838.42   23.50
  10   2   0  832.22   21.90
  10   2   0  851.01   23.30
 -11  -2   0   49.90    4.10
  11  -2   0   58.39    3.30
  11   2   0   41.10    3.40
  11   2   0   53.29    3.00
  12  -2   0   86.99    3.60
 -12  -2   0   89.19    4.50
  12   2   0   70.59    4.20
  12   2   0   89.39    3.70
   0  -3   0    3.10    0.90
   0   3   0    0.80    1.10
   0   3   0    4.80    1.20
  -1  -3   0 2339.27   58.39
   1  -3   0 2273.77   59.09
   1  -3   0 2339.57   57.39
  -1  -3   0 2345.27   58.09
   1   3   0 2447.46   57.39
   1   3   0 2417.26   59.19
   1   3   0 2379.76   58.29
  -1   3   0 2394.76   58.59
  -1   3   0 2352.16   58.09
  -2  -3   0 3312.97   82.19
  -2  -3   0 3478.85   88.29
  -2   3   0 3427.16   83.09
   2   3   0 3252.27   80.89
  -2   3   0 3421.76   81.19
   2   3   0 3312.07   81.99
   2   3   0 3334.07   83.49
  -3  -3   0 1848.72   49.80
  -3  -3   0 1887.01   46.60
   3   3   0 1841.92   45.30
   3   3   0 1816.12   46.60
   3   3   0 1807.92   48.60
  -4  -3   0  653.73   19.10
   4   3   0  702.23   18.20
   4   3   0  618.44   22.70
   4   3   0  686.43   19.80
  -5  -3   0  742.63   21.30
  -5  -3   0  709.93   20.30
   5  -3   0  700.23   19.60
   5   3   0  737.23   20.30
   5   3   0  726.23   18.80
  -5   3   0  740.73   22.00
   5   3   0  758.62   22.70
   6  -3   0 1101.19   28.60
  -6  -3   0 1088.49   31.00
  -6  -3   0 1101.59   29.50
   6   3   0 1109.19   33.50
  -6   3   0 1115.69   31.20
   6   3   0 1103.39   27.90
   6   3   0 1119.49   29.80
   7  -3   0  536.05   15.80
  -7  -3   0  543.05   16.70
  -7   3   0  557.54   18.60
   7   3   0  552.64   17.10
   7   3   0  540.15   14.90
   8  -3   0  883.11   24.20
  -8  -3   0  897.51   25.20
   8   3   0  896.21   26.10
   8   3   0  885.81   24.60
   8   3   0  893.41   23.30
   9  -3   0  421.36   13.10
  -9  -3   0  404.76   14.00
   9   3   0  387.66   15.30
   9   3   0  424.16   12.00
   9   3   0  407.36   13.30
  10  -3   0   55.49    4.00
 -10  -3   0   60.49    4.40
  10   3   0   68.69    5.10
  10   3   0   59.49    3.30
 -11  -3   0   22.20    3.50
  11  -3   0   31.70    2.90
  11   3   0   25.40    2.90
  11   3   0   26.80    2.80
 -12  -3   0    4.50    2.00
  12   3   0    2.50    1.20
   0  -4   0 1258.27   31.80
   0  -4   0 1259.47   32.40
   0   4   0 1231.68   32.10
   0   4   0 1220.88   33.20
  -1  -4   0  495.05   14.30
   1  -4   0  494.35   13.50
   1  -4   0  483.85   15.00
  -1  -4   0  487.35   14.90
  -1   4   0  488.55   15.00
   1   4   0  479.35   16.20
  -1   4   0  485.25   14.90
   1   4   0  503.95   13.70
   1   4   0  489.65   14.70
   2  -4   0  908.81   27.90
  -2  -4   0  999.50   26.50
  -2  -4   0  997.30   28.30
  -2   4   0  976.20   26.00
   2   4   0  949.40   28.90
   2   4   0 1009.00   25.10
   2   4   0 1007.90   26.40
  -2   4   0  995.10   27.50
  -3  -4   0  263.47   14.00
  -3  -4   0  262.07    9.60
   3   4   0  271.67    9.40
   3   4   0  277.77    8.40
  -4  -4   0  555.94   15.40
  -4  -4   0  566.54   16.70
  -4  -4   0  581.74   17.70
   4   4   0  576.24   19.00
   4   4   0  599.64   16.00
  -4   4   0  580.34   18.40
   4   4   0  558.54   15.00
  -5  -4   0  673.23   21.10
   5  -4   0  647.44   18.20
  -5  -4   0  666.03   17.80
  -5  -4   0  712.23   19.30
  -5   4   0  672.13   21.00
   5   4   0  667.83   21.30
   5   4   0  675.33   17.40
  -6  -4   0  803.22   22.00
   6  -4   0  794.12   21.10
  -6   4   0  778.82   23.80
   6   4   0  749.92   25.80
   6   4   0  797.12   21.90
   6   4   0  755.12   21.50
   6   4   0  753.02   20.40
   7  -4   0 1587.94   41.30
  -7  -4   0 1605.94   42.20
   7   4   0 1639.24   41.70
  -7   4   0 1648.83   44.30
   7   4   0 1616.34   40.30
   7   4   0 1626.44   42.60
  -8  -4   0   14.40    3.20
   8  -4   0    8.90    2.90
   8  -4   0   20.30    6.10
  -8   4   0   11.20    4.50
   8   4   0    7.80    4.80
   8   4   0   11.60    2.90
   8   4   0   15.90    2.20
   9  -4   0 1513.75   40.10
  -9  -4   0 1573.04   41.70
   9   4   0 1551.04   40.00
   9   4   0 1540.25   38.60
  10  -4   0  406.76   12.10
 -10  -4   0  397.26   12.70
  10   4   0  390.46   11.00
  10   4   0  410.86   12.60
 -11  -4   0    9.40    2.10
  11  -4   0    6.60    1.60
  11   4   0    4.80    1.50
   0   5   0    4.20    2.10
   0   5   0    3.60    3.40
   1  -5   0 3871.71   94.19
  -1  -5   0 3774.72   96.29
   1  -5   0 3851.21   96.29
  -1  -5   0 3826.82   95.09
   1   5   0 3801.82   94.59
  -1   5   0 3900.41   96.09
  -1   5   0 3991.20   96.79
  -2  -5   0 6267.67  147.59
  -2  -5   0 5979.00  150.08
  -2  -5   0 5944.21  144.69
   2   5   0 6224.88  145.99
   2   5   0 5604.94  147.69
  -2   5   0 6230.78  148.79
  -3  -5   0   97.49   15.40
  -3  -5   0   92.19    6.10
  -3   5   0  106.29    8.40
   3   5   0  102.19    5.00
   4  -5   0 1181.68   30.40
  -4  -5   0 1190.48   31.40
  -4  -5   0 1176.28   33.70
  -4  -5   0 1196.08   30.20
   4   5   0 1247.08   31.40
   4   5   0 1156.38   29.70
  -4   5   0 1214.28   33.40
   4   5   0 1232.28   33.70
  -5  -5   0 2381.66   59.19
  -5  -5   0 2380.46   57.89
   5  -5   0 2323.47   58.19
   5   5   0 2431.36   59.39
   5   5   0 2361.66   63.59
  -5   5   0 2396.76   63.19
   5   5   0 2330.47   58.89
   5   5   0 2323.87   57.39
   6  -5   0 2107.49   54.19
  -6  -5   0 2184.98   55.09
  -6   5   0 2232.48   57.49
   6   5   0 2177.58   54.59
   6   5   0 2180.08   53.19
  -7  -5   0  879.21   24.70
   7  -5   0  881.01   24.00
  -7   5   0  884.21   27.10
   7   5   0  861.21   22.50
   7   5   0  875.21   24.10
   8  -5   0  285.17   10.30
   8  -5   0  270.97   12.00
  -8  -5   0  278.77   10.80
   8   5   0  273.37    8.70
  -8   5   0  283.87   13.10
   8   5   0  297.07   10.30
  -9  -5   0   80.29    5.00
   9  -5   0   81.99    4.90
   9  -5   0   91.49    9.90
   9   5   0   84.39    5.40
  10  -5   0  788.02   20.80
 -10  -5   0  769.62   21.30
  10   5   0  752.02   20.80
  11  -5   0  107.59    4.50
 -11  -5   0  110.39    4.90
  11   5   0  110.99    4.30
   0  -6   0 4144.79  103.09
   0  -6   0 4267.97  105.79
   0   6   0 4447.96  106.99
   1  -6   0 1072.99   28.80
  -1  -6   0 1032.00   26.90
  -1  -6   0 1069.79   29.70
   1  -6   0 1025.90   26.90
   1   6   0 1097.89   29.90
  -1   6   0 1114.49   31.30
  -1   6   0 1031.10   29.70
  -2  -6   0 2111.29   52.09
   2  -6   0 2053.99   51.99
  -2  -6   0 2109.19   55.59
   2   6   0 2185.98   54.59
  -2   6   0 2109.59   54.79
  -2   6   0 2181.08   57.09
   3  -6   0  147.99    5.90
  -3  -6   0  154.98    5.80
   3   6   0  146.49   10.10
  -3   6   0  150.48    9.50
  -3   6   0  167.58   11.70
   3   6   0  154.78    8.20
   3   6   0  144.89    8.60
  -4  -6   0    5.20    1.90
   4  -6   0    7.30    2.40
  -4  -6   0    2.20    3.60
  -4   6   0   18.80    5.50
  -4   6   0    1.60    5.90
   4   6   0    9.50    3.40
   5  -6   0  730.43   19.60
  -5  -6   0  710.93   19.00
  -5  -6   0  704.93   20.40
  -5   6   0  688.93   22.90
   5   6   0  732.43   20.20
  -6  -6   0  124.89    7.10
   6  -6   0  120.49    6.50
   6   6   0  118.79    6.60
  -6   6   0  122.09    9.70
   7  -6   0  160.28    7.70
  -7  -6   0  166.68    8.10
   7   6   0  161.78    7.50
  -7   6   0  173.48   11.00
  -8  -6   0    7.10    2.30
   8  -6   0    2.40    2.40
  -8   6   0    5.00    3.60
   8   6   0    3.10    2.50
   9  -6   0    0.10    4.10
  -9  -6   0    3.90    2.20
   9  -6   0    3.20    2.10
   9   6   0   -2.20    2.20
 -10  -6   0    2.30    2.00
  10  -6   0    2.60    2.00
  10   6   0    3.20    1.60
 -11  -6   0   26.80    3.20
  11  -6   0   27.20    2.90
  11   6   0   29.90    2.30
   0  -7   0    1.40    1.70
   0  -7   0    1.50    3.50
   0   7   0    2.00    3.30
   0   7   0    0.10    3.60
   0   7   0    5.30    5.40
   1  -7   0   87.69    4.40
   1   7   0   79.19    9.90
  -1   7   0   96.99    8.40
  -1   7   0   99.19    9.40
  -1   7   0   89.09    7.90
   1   7   0   89.19    7.20
   1   7   0   96.19    7.00
  -2  -7   0    4.40    1.70
  -2   7   0   -3.90    4.10
   2   7   0    0.60    3.40
   2   7   0    6.90    3.10
  -2   7   0    1.90    5.00
   3  -7   0  568.74   15.60
  -3   7   0  587.74   19.40
   3   7   0  564.54   16.80
  -3   7   0  564.64   19.60
   4  -7   0  240.38    8.20
  -4  -7   0  235.18    7.90
   4   7   0  233.98    9.20
  -4   7   0  226.88   12.10
   4   7   0  236.68   10.70
  -4   7   0  234.48   12.20
  -5  -7   0   61.69    4.30
   5  -7   0   67.49    5.00
  -5  -7   0   71.89    6.80
  -5   7   0   56.79    8.80
   5   7   0   62.49    5.30
   6  -7   0   32.30    4.90
  -6  -7   0   23.70    4.00
   6   7   0   23.80    3.20
  -6   7   0   31.20    5.90
   7  -7   0  379.66   11.80
  -7  -7   0  363.56   11.90
   7   7   0  353.56   12.00
  -7   7   0  353.16   14.20
   8  -7   0   10.20    2.50
  -8  -7   0   11.50    2.70
  -8   7   0   20.50    4.10
   8   7   0   14.70    3.00
   9  -7   0   91.19    6.50
   9  -7   0   89.79    4.80
  -9  -7   0   95.19    4.90
   9   7   0   85.09    4.20
  10  -7   0   93.59    4.50
 -10  -7   0   97.29    4.70
  10   7   0   97.59    4.00
  -1  -8   0  154.48    5.90
   1  -8   0  145.49    5.90
  -1   8   0  149.69   11.50
  -1   8   0  142.39   11.70
   1   8   0  146.49    7.90
  -1   8   0  161.58    9.10
  -2  -8   0   63.39    4.00
   2  -8   0   59.09    4.00
   2   8   0   59.09    5.80
  -2   8   0   63.89    7.40
  -2   8   0   67.39    8.00
  -3  -8   0   58.69    4.00
   3  -8   0   53.59    4.10
  -3   8   0   57.39    6.80
  -3   8   0   64.19    9.90
   3   8   0   57.99    5.50
  -4  -8   0    1.10    1.90
   4  -8   0    0.70    2.20
   4   8   0    1.90    2.60
  -4   8   0   -1.90    5.30
  -4   8   0   -2.00    4.30
   5  -8   0    5.20    2.60
  -5  -8   0    3.00    2.30
  -5   8   0   12.10    5.60
   5   8   0    8.60    2.80
  -6  -8   0   -1.10    3.50
   6  -8   0    2.60    2.20
  -6   8   0    9.00    4.30
   6   8   0    4.80    2.60
  -7  -8   0   46.40    5.10
   7  -8   0   48.60    4.20
  -7   8   0   52.49    6.40
   7   8   0   52.19    4.80
  -8  -8   0   48.10    4.80
   8  -8   0   54.29    4.00
   8  -8   0   39.70    4.70
   8   8   0   47.90    3.50
  -9  -8   0   31.50    3.20
   9  -8   0   46.40    4.00
   9  -8   0   36.20    3.50
   9   8   0   33.40    2.70
   0  -9   0   -2.60    1.70
   0   9   0   -2.60    3.20
  -1  -9   0  269.27    8.80
   1  -9   0  275.17    8.90
   1   9   0  259.57   10.90
  -1   9   0  273.37   11.80
   2  -9   0  520.85   16.40
   2  -9   0  529.55   14.80
  -2  -9   0  513.55   14.70
  -2   9   0  521.05   18.20
   2   9   0  515.15   16.40
   3  -9   0  375.06   11.60
  -3  -9   0  364.96   11.30
  -3   9   0  379.96   15.00
   3   9   0  379.26   12.90
  -3   9   0  375.16   16.60
   4   9   0   74.99    5.90
  -4   9   0   92.09   14.10
  -4   9   0   78.89    8.20
  -5  -9   0   63.29    3.80
   5  -9   0   62.89    4.20
  -5   9   0   67.89    7.90
   5   9   0   67.49    5.40
   6  -9   0  379.56   11.70
  -6   9   0  383.26   13.90
  -7  -9   0    8.60    2.70
   7  -9   0   11.90    2.20
  -7   9   0   12.50    3.90
   7   9   0    8.80    1.80
   8  -9   0  119.19    5.60
   8  -9   0  119.59    5.10
   8   9   0  118.99    4.80
   0 -10   0  306.57    9.60
   0 -10   0  309.57   11.20
   0  10   0  320.47   12.60
  -1 -10   0  462.95   12.90
   1 -10   0  441.96   14.30
   1 -10   0  444.26   12.90
  -1  10   0  449.36   15.90
   1  10   0  444.06   15.30
  -2 -10   0   31.70    2.80
   2 -10   0   25.00    2.90
   2 -10   0   28.90    4.80
  -2  10   0   24.70    4.60
   2  10   0   35.00    5.20
   3 -10   0   27.00    3.00
  -3 -10   0   25.70    2.70
   3  10   0   41.80    5.30
  -3  10   0   29.20    5.00
  -4 -10   0  106.79    6.30
   4 -10   0  108.09    4.90
  -4 -10   0  100.89    4.40
   4  10   0  111.59    6.70
   5 -10   0  135.79    5.50
  -5 -10   0  143.09    5.80
   5  10   0  130.19    5.90
  -5  10   0  128.19    9.40
   6 -10   0   96.49    4.50
  -6 -10   0   89.99    4.60
   6  10   0   86.89    4.40
  -6  10   0   87.09    8.00
  -7 -10   0   17.60    3.20
   7 -10   0   10.60    2.10
   7  10   0   12.80    1.90
   0 -11   0   -0.60    2.20
   0 -11   0    1.40    1.50
  -1 -11   0  227.38    7.30
   1 -11   0  238.58    8.50
   1 -11   0  226.58    7.40
  -1 -11   0  235.48    8.60
  -1  11   0  233.08   12.50
   1  11   0  234.08   11.90
  -2 -11   0  230.78    7.40
   2 -11   0  236.58    7.60
  -2 -11   0  237.18    8.30
   2 -11   0  234.98    8.90
   2  11   0  226.08    8.80
  -2  11   0  243.78    9.50
  -3 -11   0  235.38    7.30
   3 -11   0  237.18    7.60
  -3 -11   0  225.98    8.00
  -3  11   0  235.08    9.30
   3  11   0  232.08    8.60
   4 -11   0  424.46   12.00
  -4 -11   0  414.86   12.30
  -4 -11   0  406.06   11.60
   4  11   0  422.66   12.70
   5 -11   0   13.70    2.10
  -5 -11   0   12.70    2.00
   5  11   0   13.20    2.00
  -6 -11   0  412.06   12.40
   6 -11   0  441.76   11.90
   6  11   0  430.46   12.10
   0 -12   0  244.88    8.10
   0 -12   0  243.98    7.90
   0  12   0  241.98    8.60
  -1 -12   0   44.40    3.20
   1 -12   0   52.89    3.80
   1 -12   0   46.80    4.30
  -1 -12   0   48.30    3.60
  -1  12   0   50.39    4.00
   1  12   0   51.79    3.80
  -2 -12   0  430.26   11.90
   2 -12   0  440.86   12.00
  -2 -12   0  434.16   12.60
  -2  12   0  433.36   13.20
   2  12   0  438.76   13.10
  -3 -12   0   25.40    3.00
   3 -12   0   35.40    2.90
   3  12   0   25.30    3.20
  12   0  -1  293.87    8.70
  12   0  -1  275.27    8.00
 -11   0   1   95.99    5.70
  11   0  -1   99.19    4.20
 -10   0   1   20.40    3.00
  10   0  -1   24.10    2.80
  -9   0   1    4.10    3.40
   9   0  -1    4.50    2.10
   8   0  -1  459.85   13.50
  -8   0   1  453.55   14.80
   7   0  -1  552.94   15.90
  -7   0   1  576.84   17.10
   6   0  -1    2.40    3.80
  -6   0   1    0.90    2.80
   6   0  -1    0.20    2.00
   5   0  -1    4.70    2.40
   5   0  -1    7.40    2.70
   4   0  -1  500.05   17.90
   4   0  -1  539.65   14.80
  -4   0   1  545.15   14.00
   3   0  -1 2930.11   70.99
  -3   0   1 2917.91   70.59
   2   0  -1  928.61   22.60
  -2   0   1  877.81   22.40
  -1   0   1  960.60   23.20
   1   0  -1  937.91   23.20
   0   0   1    0.80    0.20
   0   0   1    0.80    0.20
   1   0   1  894.81   21.50
  -1   0  -1  906.31   22.80
   1   0   1  866.41   22.60
   2   0   1  804.02   22.80
   2   0   1  873.71   20.70
   3   0   1 2828.32   67.39
   3   0   1 2744.83   70.69
   4   0   1  551.64   15.40
   4   0   1  570.34   19.20
   5   0   1    8.90    2.30
   6   0   1    1.90    4.10
   6   0   1   -0.20    2.10
  -6   0  -1    1.80    2.70
  -7   0  -1  544.95   16.30
   8   0   1  470.65   13.70
  -8   0  -1  458.15   14.80
   9   0   1    0.20    2.10
  -9   0  -1    4.80    3.10
 -10   0  -1   27.00    4.20
  10   0   1   23.80    2.90
  11   0   1   96.89    4.20
 -11   0  -1   95.89    5.60
  12   0   1  290.77    8.20
  12   0   1  287.87    8.70
  12  -1  -1  160.58    5.50
  12  -1  -1  158.88    5.20
 -12  -1   1  139.39    6.20
  12   1  -1  155.58    5.40
  12   1  -1  145.39    5.10
 -11  -1   1    0.10    2.30
  11  -1  -1    5.10    1.60
  11   1  -1    6.60    1.50
  11   1  -1    6.40    1.80
  10  -1  -1  167.98    6.40
 -10  -1   1  174.48    7.40
  10   1  -1  169.68   13.30
 -10   1   1  171.68    7.50
  10   1  -1  168.98    6.10
   9  -1  -1  775.52   21.40
  -9  -1   1  784.92   22.60
   9   1  -1  756.42   20.90
  -9   1   1  791.62   22.60
   8  -1  -1   64.39    4.70
  -8  -1   1   61.49    5.60
  -8   1   1   62.19    6.40
   8   1  -1   61.19    4.20
  -7  -1   1  271.67   10.30
   7  -1  -1  272.67    9.10
   7   1  -1  276.47    8.80
  -7   1   1  269.97   10.40
   6  -1  -1  448.46   21.00
   6  -1  -1  443.56   12.90
  -6  -1   1  458.85   14.00
   6   1  -1  461.25   12.60
  -6   1   1  419.46   14.00
  -6   1   1  444.86   15.20
   6   1  -1  433.46   18.70
  -5  -1   1 1412.06   37.70
  -5  -1   1 1545.15   37.50
   5   1  -1 1516.05   42.60
   5   1  -1 1477.55   39.60
   5   1  -1 1395.36   36.50
  -4  -1   1 2747.33   68.09
   4   1  -1 2823.12   71.59
   4   1  -1 2778.42   69.39
  -3  -1   1  838.02   21.60
  -3   1   1  849.41   20.20
   3   1  -1  817.62   23.30
   3   1  -1  809.82   22.20
  -2  -1   1 1249.28   30.60
  -2   1   1 1242.48   29.60
   2   1  -1 1203.38   31.00
   2   1  -1 1197.98   31.30
   0  -1   1  392.16    9.90
   0  -1  -1  410.96   10.30
   0  -1  -1  378.26   10.00
   0  -1   1  392.26   10.40
   0   1   1  395.46   10.00
   0   1  -1  417.16   10.40
   0   1   1  387.86   10.30
   0   1  -1  398.16    9.90
  -2  -1  -1 1146.29   29.00
  -2  -1  -1 1184.38   31.20
   2   1   1 1188.28   29.50
   2   1   1 1180.98   30.40
  -3  -1  -1  833.42   21.50
   3   1   1  862.41   22.30
   3   1   1  832.62   23.80
  -4  -1  -1 2725.13   64.29
   4  -1   1 2660.03   69.69
   4   1   1 2408.66   67.49
   4   1   1 2717.83   65.59
   5  -1   1 1510.05   44.10
  -5  -1  -1 1451.75   37.60
   5   1   1 1520.75   42.10
   5   1   1 1461.55   39.30
  -5   1  -1 1370.26   38.20
   6  -1   1  430.86   13.00
  -6  -1  -1  447.16   13.70
   6  -1   1  441.76   21.10
  -6   1  -1  444.06   13.90
   6   1   1  461.45   12.60
   6   1   1  437.46   18.70
  -7  -1  -1  267.47   10.10
   7  -1   1  250.67   10.50
   7   1   1  265.07    8.60
  -7   1  -1  278.67   10.20
  -8  -1  -1   58.59    5.60
   8  -1   1   63.79    4.80
   8   1   1   65.49    4.20
  -8   1  -1   62.29    6.30
   9  -1   1  771.52   20.80
  -9  -1  -1  757.32   21.80
   9   1   1  764.02   20.40
   9   1   1  700.53   23.70
  -9   1  -1  760.82   21.70
  10  -1   1  163.68    6.30
 -10  -1  -1  164.78    7.20
 -10   1  -1  153.28    7.50
  10   1   1  176.58    6.10
  10   1   1  166.48   11.60
  11  -1   1    6.20    1.50
 -11  -1  -1    8.80    2.50
  11   1   1    6.90    1.50
  11   1   1    6.70    1.80
  12  -1   1  148.79    5.40
  12  -1   1  160.98    5.10
 -12  -1  -1  154.28    6.40
  12   1   1  156.28    5.40
  12   1   1  149.79    5.00
 -12  -2   1   79.19    4.60
  12  -2  -1   80.79    3.60
  12   2  -1   87.39    3.60
  11  -2  -1  359.16   10.60
 -11  -2   1  370.16   11.50
  11   2  -1  366.06   10.10
  11   2  -1  359.36   11.10
 -10  -2   1   29.50    4.20
  10   2  -1   35.20    4.60
  10   2  -1   31.50    2.80
  -9  -2   1  836.02   23.70
   9  -2  -1  822.82   22.60
   9   2  -1  777.12   25.20
   9   2  -1  854.51   21.90
  -8  -2   1  108.29    6.60
   8  -2  -1  106.09    5.70
   8   2  -1   96.89    6.80
   8   2  -1  109.79    5.00
   7  -2  -1 2014.40   51.09
   7  -2  -1 2045.50   53.79
  -7  -2   1 2076.49   52.19
  -7   2   1 2056.09   53.49
  -7   2   1 2041.80   51.89
   7   2  -1 2040.80   50.49
  -6  -2   1  656.53   19.90
  -6  -2   1  675.43   19.40
   6  -2  -1  683.63   18.40
  -6   2   1  684.73   20.80
   6   2  -1  686.33   23.60
   6   2  -1  688.33   17.90
  -6   2   1  663.93   19.80
   5  -2  -1  117.49    9.00
  -5  -2   1  114.09    5.80
  -5  -2   1  104.49    6.30
   5   2  -1  114.89    4.70
  -5   2   1  100.79    7.90
   5   2  -1  103.49   11.70
   5   2  -1  113.89    7.00
  -4  -2   1 1803.82   45.60
   4   2  -1 1848.42   47.40
   4   2  -1 1768.52   47.70
  -3  -2   1  131.49    5.30
   3   2  -1  135.69    6.90
   3   2  -1  141.09    5.70
  -2  -2   1 1782.82   44.50
  -2  -2   1 1811.42   43.80
   2   2  -1 1743.83   43.20
  -2   2   1 1851.91   42.20
   2   2  -1 1573.94   42.80
  -2   2   1 1743.53   44.30
  -1  -2   1 6070.09  148.99
  -1   2   1 6204.98  148.99
   1   2  -1 6363.16  149.59
   0  -2   1 1045.70   26.70
   0  -2   1 1062.89   26.40
   0  -2  -1 1020.60   26.40
   0  -2  -1 1062.99   26.90
   0   2   1 1199.38   27.40
   0   2   1 1066.29   26.60
   0   2   1  973.20   26.80
   0   2  -1 1078.19   26.30
   0   2  -1 1102.39   27.20
  -1   2  -1 5949.40  145.29
   1   2   1 6163.38  145.39
   2  -2   1 1861.11   42.30
  -2  -2  -1 1800.62   43.70
  -2  -2  -1 1787.82   45.60
   2   2   1 1685.53   45.00
   2   2   1 1751.42   43.10
   2   2   1 1713.53   44.00
  -3  -2  -1  141.29    5.10
  -3  -2  -1  134.49    8.10
   3   2   1  136.39    6.50
   3   2   1  131.39    4.90
   3   2   1  138.89    5.90
  -4  -2  -1 1889.01   46.70
   4   2   1 1871.71   48.90
   4   2   1 1813.52   48.50
  -5  -2  -1  103.69    6.10
  -5  -2  -1  112.69    5.30
   5   2   1  105.59   11.10
  -5   2  -1  111.79    8.10
   5   2   1  108.89    4.70
   5   2   1  112.39    7.20
   6  -2   1  661.73   28.00
   6  -2   1  677.33   18.60
  -6  -2  -1  687.93   19.20
  -6   2  -1  701.73   20.80
   6   2   1  668.93   23.70
  -6   2  -1  653.73   19.60
   6   2   1  706.03   18.00
  -7  -2  -1 2051.09   50.79
   7  -2   1 1963.10   50.39
   7   2   1 1967.90   49.30
  -7   2  -1 2005.40   50.49
   8  -2   1  113.59    5.90
  -8  -2  -1  113.49    6.70
   8   2   1   96.39    6.90
   8   2   1  112.79    5.00
   9  -2   1  818.52   22.70
  -9  -2  -1  818.12   23.70
   9   2   1  829.92   25.80
   9   2   1  849.81   22.10
 -10  -2  -1   43.30    4.10
  10   2   1   40.50    4.50
  10   2   1   32.00    2.90
  11  -2   1  372.36   10.80
 -11  -2  -1  366.86   11.50
  11   2   1  370.06   11.20
  11   2   1  363.16   10.30
 -12  -2  -1   81.79    4.60
  12  -2   1   84.19    3.50
  12   2   1   68.89    3.50
  12   2   1   82.49    3.60
  12  -3  -1   45.40    2.80
 -12  -3   1   46.40    3.50
  12   3  -1   44.50    2.60
 -11  -3   1  114.29    5.30
  11  -3  -1  117.79    4.80
  11   3  -1  110.39    4.70
  11   3  -1  116.19    4.90
 -10  -3   1  180.08    7.50
  10  -3  -1  184.68    6.80
  10   3  -1  183.38    7.70
  10   3  -1  165.78    5.90
   9  -3  -1  690.83   19.40
  -9  -3   1  686.03   20.40
   9   3  -1  666.53   18.20
   9   3  -1  674.83   19.50
   8  -3  -1  958.80   27.70
   8  -3  -1  955.70   26.00
  -8  -3   1  973.30   27.10
   8   3  -1  953.00   27.70
  -8   3   1 1007.70   28.90
   8   3  -1  974.50   25.00
   8   3  -1  934.91   26.20
  -7  -3   1  296.87   11.30
   7  -3  -1  306.97   10.40
   7   3  -1  318.77    9.50
  -7   3   1  322.87   13.40
   7   3  -1  335.87   11.40
   6  -3  -1   30.10    4.10
  -6  -3   1   31.60    6.70
  -6  -3   1   24.70    3.60
   6   3  -1   32.20    3.00
   6   3  -1   24.60    3.90
  -6   3   1   25.90    4.40
   6   3  -1   30.70    3.50
  -5  -3   1  366.56   12.10
  -5  -3   1  392.06   13.10
   5  -3  -1  360.66   11.30
  -5  -3   1  358.56   10.90
   5   3  -1  369.96   10.40
   5   3  -1  391.36   13.70
   5   3  -1  386.56   11.80
  -5   3   1  365.96   13.80
  -4  -3   1 3216.88   79.59
   4   3  -1 3232.58   78.09
   4   3  -1 3120.19   83.29
   4   3  -1 3244.28   79.89
  -3  -3   1 2875.91   75.69
  -3  -3   1 3056.59   73.49
   3   3  -1 3041.10   75.69
   3   3  -1 2911.01   72.89
   3   3  -1 2944.11   71.79
  -2  -3   1  265.67    9.60
  -2  -3   1  277.87    8.90
   2  -3  -1  249.38    9.90
  -2   3   1  256.17    9.50
   2   3  -1  277.37    8.20
  -2   3   1  266.37    7.90
   2   3  -1  275.97    7.60
   2   3  -1  270.17   10.40
   1  -3  -1 1538.75   36.40
  -1  -3   1 1379.56   35.20
  -1  -3   1 1347.67   35.40
   1  -3  -1 1321.57   34.40
  -1   3   1 1406.36   35.10
   1   3  -1 1370.76   34.40
   1   3  -1 1384.96   36.50
   1   3  -1 1456.45   35.10
  -1   3   1 1386.86   35.70
   0  -3   1  712.73   18.60
   0  -3  -1  696.33   18.50
   0  -3   1  718.73   18.80
   0   3   1  722.43   19.40
   0   3   1  694.83   18.70
   0   3   1  718.43   19.70
   0   3  -1  719.63   18.60
   0   3  -1  710.23   19.70
  -1  -3  -1 1386.06   35.10
   1  -3   1 1366.06   35.70
   1  -3   1 1411.26   34.50
   1   3   1 1385.66   36.00
  -1   3  -1 1438.76   35.40
   1   3   1 1410.36   34.50
  -1   3  -1 1340.37   35.50
   1   3   1 1423.86   35.50
  -2  -3  -1  271.57   10.50
   2  -3   1  272.17    7.30
  -2  -3  -1  272.27    8.60
  -2   3  -1  272.17    8.00
   2   3   1  280.07    8.80
   2   3   1  263.07    7.80
   2   3   1  261.47    9.90
  -3  -3  -1 2875.31   72.59
  -3  -3  -1 3021.40   76.79
   3   3   1 2919.01   74.59
   3   3   1 2961.00   73.29
   3   3   1 2972.80   71.79
  -4  -3  -1 2945.31   83.69
  -4  -3  -1 3207.18   77.89
   4   3   1 3181.28   76.89
   4   3   1 3086.99   80.99
   4   3   1 3286.17   79.19
  -5  -3  -1  356.06   11.90
  -5  -3  -1  378.06   12.60
  -5   3  -1  362.36   13.60
   5   3   1  361.96   10.40
   5   3   1  386.76   14.20
   5   3   1  387.76   12.00
  -6  -3  -1   21.30    3.30
  -6  -3  -1   22.00    3.30
   6  -3   1   38.40    5.10
   6   3   1   28.20    3.30
   6   3   1   17.30    3.80
   6   3   1   25.90    2.90
  -6   3  -1   27.50    4.30
   7  -3   1  310.67   10.60
  -7  -3  -1  329.27   11.30
   7   3   1  315.17    9.60
  -7   3  -1  308.17   13.00
   7   3   1  327.97   11.70
  -8  -3  -1  991.60   27.20
   8  -3   1  979.90   26.20
   8   3   1  948.31   26.50
   8   3   1  976.50   28.20
   8   3   1  978.90   25.30
   9  -3   1  680.23   19.50
  -9  -3  -1  696.73   20.50
   9   3   1  699.13   18.50
   9   3   1  644.44   21.60
   9   3   1  708.03   19.80
  10  -3   1  172.08    6.70
 -10  -3  -1  177.78    7.30
  10   3   1  175.38    6.00
  10   3   1  180.68    7.50
  11  -3   1  116.19    4.80
 -11  -3  -1  124.09    5.40
  11   3   1  114.49    4.40
  11   3   1  113.29    4.90
  12  -3   1   40.80    2.70
 -12  -3  -1   34.60    3.60
  12   3   1   44.00    2.60
 -11  -4   1  720.93   19.70
  11  -4  -1  720.13   19.00
  11   4  -1  715.33   19.20
 -10  -4   1   54.79    4.20
  10  -4  -1   57.59    4.00
  10   4  -1   56.69    4.60
  -9  -4   1   99.19    5.90
   9  -4  -1  108.59    5.60
   9  -4  -1   94.49   10.10
   9   4  -1  109.99    4.50
   9   4  -1  103.39    6.20
  -8  -4   1 1070.89   29.30
   8  -4  -1 1065.69   29.60
   8  -4  -1 1066.69   28.50
   8   4  -1 1030.40   28.40
  -8   4   1 1057.19   31.20
   8   4  -1 1061.59   27.00
   7  -4  -1  405.46   12.90
  -7  -4   1  419.36   13.70
   7   4  -1  395.06   13.10
   7   4  -1  407.36   11.60
  -7   4   1  417.86   15.70
  -6  -4   1 2538.45   63.09
  -6  -4   1 2553.64   61.39
   6   4  -1 2263.87   63.09
   6   4  -1 2581.74   62.99
  -6   4   1 2648.03   65.29
   6   4  -1 2499.25   62.49
  -5  -4   1   25.30    3.60
  -5  -4   1   20.00    3.40
  -5  -4   1   15.60    3.10
   5  -4  -1   15.00    2.80
   5   4  -1   14.60    2.80
   5   4  -1   22.70    3.60
  -5   4   1   25.80    4.90
   5   4  -1   19.00    2.70
  -4  -4   1  301.27   11.20
   4  -4  -1  275.57    9.40
  -4  -4   1  292.07    9.10
  -4  -4   1  290.17   10.70
   4   4  -1  315.37    9.40
   4   4  -1  315.37    9.40
  -4   4   1  298.97   12.20
   4   4  -1  310.47   10.70
  -3  -4   1  795.22   22.50
  -3  -4   1  751.02   25.50
   3   4  -1  812.52   20.60
   3   4  -1  803.52   21.80
  -2  -4   1 1396.96   38.30
  -2  -4   1 1406.16   37.10
  -2   4   1 1449.15   36.50
   2   4  -1 1397.16   39.70
   2   4  -1 1441.96   36.60
   2   4  -1 1471.15   35.50
  -2   4   1 1407.06   38.10
   1  -4  -1  404.96   13.00
  -1  -4   1  405.76   12.40
   1  -4  -1  413.56   11.30
  -1  -4   1  381.06   12.00
   1   4  -1  374.26   14.20
  -1   4   1  399.96   12.80
   1   4  -1  375.56   12.00
  -1   4   1  391.96   12.50
   1   4  -1  403.86   11.40
   0  -4  -1  100.69    4.50
   0  -4   1  106.69    4.70
   0  -4  -1  103.49    5.40
   0  -4   1  113.99    5.10
   0   4  -1  119.39    6.90
   0   4  -1  116.49    5.20
   0   4   1  106.39    5.10
   0   4   1  100.89    6.10
   1  -4   1  388.76   12.80
   1  -4   1  402.66   11.60
  -1  -4  -1  413.46   12.20
  -1  -4  -1  416.26   13.30
  -1   4  -1  395.06   13.10
  -1   4  -1  405.26   12.90
   1   4   1  413.46   11.80
   1   4   1  427.56   13.10
   1   4   1  396.76   14.00
   2  -4   1 1388.56   38.60
   2  -4   1 1433.66   35.30
  -2  -4  -1 1456.05   36.90
  -2  -4  -1 1414.26   39.30
   2   4   1 1341.27   35.70
  -2   4  -1 1452.45   36.50
   2   4   1 1407.46   39.20
   2   4   1 1503.95   37.40
  -3  -4  -1  716.83   26.20
  -3  -4  -1  766.52   21.60
   3   4   1  783.52   20.30
   3   4   1  791.92   21.90
  -4  -4  -1  297.57   10.40
  -4  -4  -1  281.17    8.90
  -4  -4  -1  305.97   11.00
  -4   4  -1  290.67   12.10
   4   4   1  300.17    8.50
   4   4   1  287.47   11.00
   4   4   1  315.37    9.60
   5  -4   1   21.20    3.60
  -5  -4  -1   16.50    2.70
  -5  -4  -1   16.80    3.00
  -5  -4  -1   15.60    3.00
   5   4   1   18.40    2.50
  -5   4  -1   21.70    4.60
   5   4   1   14.60    2.80
   5   4   1   21.80    2.80
  -6  -4  -1 2670.73   64.89
   6  -4   1 2508.45   63.89
   6   4   1 2569.64   64.39
   6   4   1 2613.64   63.19
  -6   4  -1 2590.74   66.69
   6   4   1 2621.24   65.29
  -7  -4  -1  411.46   13.50
   7  -4   1  394.06   12.70
  -7   4  -1  399.26   15.40
   7   4   1  413.96   11.60
   7   4   1  408.76   13.10
   7   4   1  401.46   13.60
  -8  -4  -1 1062.29   29.10
   8  -4   1 1044.10   28.20
   8   4   1 1029.20   29.80
   8   4   1 1068.29   28.40
   8   4   1 1063.69   27.00
  -9  -4  -1  108.89    6.00
   9  -4   1   96.39    5.30
   9   4   1  103.79    6.20
   9   4   1  101.69    4.40
 -10  -4  -1   50.69    4.20
  10  -4   1   62.29    3.90
  10   4   1   52.69    4.70
  10   4   1   51.59    3.10
  11  -4   1  711.13   18.70
 -11  -4  -1  703.53   19.30
  11   4   1  698.53   18.80
  11  -5  -1   23.70    2.80
 -11  -5   1   24.10    3.20
  11   5  -1   25.40    2.40
  10  -5  -1  398.66   11.80
 -10  -5   1  393.66   12.30
  10   5  -1  384.56   11.70
   9  -5  -1   24.60    3.70
   9  -5  -1   40.30    5.80
  -9  -5   1   34.70    4.00
   9   5  -1   38.50    4.30
  -8  -5   1   66.39    6.20
   8  -5  -1   78.49    5.90
   8  -5  -1   67.89    8.00
   8   5  -1   74.79    5.50
  -8   5   1   82.59    8.70
   7  -5  -1   12.90    3.10
  -7  -5   1   21.10    3.60
   7   5  -1   17.40    2.40
  -7   5   1   16.30    4.60
   7   5  -1   13.10    2.80
   6  -5  -1  126.79    6.30
  -6  -5   1  127.79    7.00
  -6  -5   1  125.59    5.80
   6   5  -1  119.79    6.50
  -6   5   1  133.79    9.50
   6   5  -1  113.09    5.20
  -5  -5   1  130.59    5.60
   5  -5  -1  138.19    6.20
  -5  -5   1  132.89    7.20
  -5   5   1  132.39    9.10
   5   5  -1  151.38    7.30
   5   5  -1  133.29    5.30
  -4  -5   1  402.16   13.00
  -4  -5   1  407.36   11.60
   4  -5  -1  407.56   11.80
  -4  -5   1  385.76   14.70
  -4   5   1  404.96   14.80
  -3  -5   1  957.70   27.50
  -3  -5   1  925.21   32.70
   3  -5  -1  973.60   24.50
  -3  -5   1  967.20   24.70
  -3   5   1  922.71   27.20
   3   5  -1 1008.80   25.50
   3   5  -1  981.70   27.00
  -2  -5   1 2281.87   56.79
  -2  -5   1 2120.89   53.99
  -2  -5   1 2175.58   58.69
   2   5  -1 2267.17   56.79
  -2   5   1 2294.37   58.19
  -2   5   1 2111.99   56.09
  -2   5   1 2136.59   56.69
   2   5  -1 2289.97   55.09
  -1  -5   1  895.41   24.90
   1  -5  -1  819.32   25.30
  -1  -5   1  879.31   24.00
  -1   5   1  815.32   25.30
   1   5  -1  879.71   23.40
  -1   5   1  837.12   24.80
   0  -5  -1 2446.36   59.89
   0  -5  -1 2403.26   61.49
   0  -5   1 2409.76   59.99
   0  -5   1 2298.37   60.39
   0   5  -1 2381.66   62.79
   0   5   1 2373.26   60.59
   0   5   1 2391.56   62.49
   0   5  -1 2430.46   60.39
  -1  -5  -1  870.01   24.20
   1  -5   1  888.51   23.50
  -1  -5  -1  846.82   26.10
   1  -5   1  849.41   25.10
  -1   5  -1  894.11   25.10
   1   5   1  855.91   25.60
   1   5   1  889.81   24.00
  -1   5  -1  911.21   26.30
   2  -5   1 2247.48   54.89
  -2  -5  -1 2113.59   60.09
  -2  -5  -1 2313.47   56.89
  -2  -5  -1 2216.18   54.29
   2   5   1 2147.29   63.39
   2   5   1 2307.77   55.69
  -3  -5  -1  970.10   25.10
  -3  -5  -1  975.90   27.90
   3   5   1 1015.00   28.40
  -3   5  -1  951.10   27.90
   3   5   1 1021.00   26.30
  -4  -5  -1  400.06   11.40
  -4  -5  -1  402.86   14.60
  -4  -5  -1  392.96   12.70
   4  -5   1  386.36   11.90
   4   5   1  401.06   11.00
  -4   5  -1  404.86   14.80
   4   5   1  417.06   12.50
   4   5   1  411.56   14.80
  -5  -5  -1  133.99    6.90
   5  -5   1  136.69    6.60
  -5  -5  -1  135.69    5.60
   5   5   1  131.99    7.00
   5   5   1  134.19    5.00
   5   5   1  135.69    6.00
   5   5   1  129.09    9.50
   6  -5   1  118.49    6.80
  -6  -5  -1  128.39    6.80
   6   5   1  130.99    6.50
   6   5   1  126.19    6.70
  -6   5  -1  127.99    9.30
   6   5   1  133.29    5.10
   7  -5   1   17.50    3.40
  -7  -5  -1   15.20    3.20
   7   5   1   17.70    3.30
  -7   5  -1   18.10    4.90
   7   5   1   23.20    3.60
   7   5   1   15.70    2.20
   8  -5   1   70.59    7.00
   8  -5   1   71.49    5.90
  -8  -5  -1   78.79    6.10
   8   5   1   76.79    4.30
   8   5   1   68.79    5.50
   9  -5   1   36.70    3.90
  -9  -5  -1   34.20    3.90
   9   5   1   36.00    4.40
   9   5   1   33.00    3.00
  10  -5   1  401.46   11.90
 -10  -5  -1  402.06   12.40
  10   5   1  398.26   11.90
  11  -5   1   28.10    2.90
 -11  -5  -1   29.00    3.10
  11   5   1   29.80    2.50
 -11  -6   1   28.70    3.20
  11   6  -1   29.60    2.30
 -10  -6   1   49.00    3.80
  10  -6  -1   47.50    3.60
  10   6  -1   46.80    3.00
   9  -6  -1    3.80    2.10
   9  -6  -1    5.80    3.60
  -9  -6   1    5.80    2.20
   9   6  -1    3.80    2.40
  -8  -6   1  327.37   11.00
   8  -6  -1  319.37   10.70
   8   6  -1  313.77   11.00
  -8   6   1  317.37   12.80
   7  -6  -1  714.43   20.50
  -7  -6   1  730.23   21.00
   7   6  -1  708.33   20.50
  -7   6   1  725.03   23.90
   6  -6  -1 1691.53   43.70
  -6  -6   1 1713.23   42.80
  -6  -6   1 1770.42   44.50
  -6   6   1 1721.83   47.30
   6   6  -1 1699.43   44.00
  -5  -6   1   84.19    6.30
   5  -6  -1   89.39    5.30
  -5  -6   1   85.69    4.70
   5   6  -1   95.19    6.00
  -5   6   1   93.19    8.90
  -4  -6   1  710.53   18.50
  -4  -6   1  678.03   19.70
   4   6  -1  663.73   19.30
   4   6  -1  655.33   20.30
  -4   6   1  720.33   22.10
  -4   6   1  675.83   21.90
   3  -6  -1  283.67    8.80
  -3  -6   1  286.57    8.90
  -3   6   1  282.77   13.60
   3   6  -1  265.97   10.30
  -3   6   1  298.57   12.50
  -2  -6   1  317.77    9.60
  -2  -6   1  310.57   12.60
   2  -6  -1  327.27    9.50
  -2   6   1  313.17   13.20
  -2   6   1  336.87   12.90
   1  -6  -1    9.00    1.90
  -1  -6   1    9.80    2.00
  -1  -6   1    8.20    2.40
   1   6  -1    7.40    3.10
  -1   6   1    8.40    4.20
  -1   6   1   15.00    2.90
   0  -6  -1  618.44   17.10
   0  -6   1  732.83   25.50
   0  -6  -1  661.63   19.60
   0  -6   1  639.64   19.50
   0  -6   1  620.64   17.30
   0   6  -1  650.83   20.40
   0   6   1  611.74   19.50
   0   6   1  681.63   20.80
  -1  -6  -1   10.70    1.80
  -1  -6  -1    8.00    2.20
   1  -6   1    6.70    2.00
   1  -6   1    9.90    2.50
   1   6   1   15.90    4.30
  -1   6  -1    9.10    5.70
  -1   6  -1    5.20    3.40
  -2  -6  -1  300.07   12.20
  -2  -6  -1  314.97    9.30
   2  -6   1  317.87    9.60
   2   6   1  307.87   11.20
  -2   6  -1  321.07   13.50
   2   6   1  317.27   13.80
   2   6   1  314.97   12.70
   3  -6   1  278.87    8.90
   3   6   1  271.77   10.00
   3   6   1  264.37   12.70
   3   6   1  280.87   10.00
   3   6   1  253.37   10.30
  -3   6  -1  281.97   12.40
  -3   6  -1  289.47   13.40
  -4  -6  -1  688.13   19.60
  -4  -6  -1  688.33   19.40
   4  -6   1  682.53   18.40
   4   6   1  675.93   26.90
   4   6   1  707.43   20.00
   4   6   1  679.03   19.30
  -4   6  -1  669.73   21.90
   4   6   1  671.23   19.00
  -5  -6  -1   88.19    4.60
   5  -6   1   84.29    5.50
  -5  -6  -1   85.69    6.20
   5   6   1   79.29    5.90
  -5   6  -1   83.89    8.70
   5   6   1   77.29    6.10
   5   6   1   79.79    5.90
  -6  -6  -1 1688.33   43.70
   6  -6   1 1735.43   43.10
  -6   6  -1 1708.23   46.40
   6   6   1 1647.54   43.50
  -7  -6  -1  717.13   21.10
   7  -6   1  737.23   20.70
   7   6   1  750.12   20.80
  -7   6  -1  713.53   23.60
  -8  -6  -1  294.47   10.70
   8  -6   1  322.47   10.70
   8   6   1  335.47   11.00
  -9  -6  -1    5.80    2.30
   9  -6   1   -3.00    2.20
   9   6   1    0.40    2.30
  10  -6   1   45.40    3.70
 -10  -6  -1   42.10    3.60
  10   6   1   46.10    3.10
 -11  -6  -1   27.60    3.20
  11   6   1   33.30    2.40
 -10  -7   1  169.08    6.40
  10  -7  -1  180.88    6.30
  10   7  -1  185.08    6.00
   9  -7  -1   -0.40    2.00
   9  -7  -1   -1.90    3.20
  -9  -7   1    4.20    2.30
   9   7  -1    4.30    1.60
   8  -7  -1   28.80    3.70
  -8  -7   1   26.10    4.00
   8   7  -1   25.90    3.30
  -8   7   1   20.70    3.60
  -7  -7   1  675.73   19.70
   7  -7  -1  703.53   19.80
   7   7  -1  704.53   19.90
  -7   7   1  697.93   22.50
  -6  -7   1  572.04   17.30
   6  -7  -1  579.84   16.90
  -6  -7   1  572.24   15.80
   6   7  -1  553.94   16.90
  -6   7   1  577.24   20.60
  -5  -7   1  887.71   23.20
  -5  -7   1  855.51   24.50
   5  -7  -1  890.41   23.80
   5   7  -1  882.11   24.30
   5   7  -1  862.31   24.50
  -5   7   1  921.01   27.80
  -4  -7   1 1470.15   36.90
   4  -7  -1 1429.96   37.00
   4   7  -1 1461.15   37.90
   4   7  -1 1480.85   37.80
  -4   7   1 1466.25   40.80
  -4   7   1 1449.26   40.30
  -3  -7   1  240.88    8.10
   3  -7  -1  241.58    8.00
  -3   7   1  240.18   12.30
   3   7  -1  237.48    9.30
   3   7  -1  233.48   10.00
  -3   7   1  257.47   12.30
   2  -7  -1  770.02   19.90
  -2  -7   1  766.82   20.10
  -2   7   1  761.62   22.90
  -2   7   1  755.12   25.50
   2   7  -1  757.72   21.30
   2   7  -1  751.42   21.10
  -2   7   1  695.63   25.90
   1   7  -1  679.13   19.70
  -1   7   1  652.93   22.60
  -1   7   1  685.03   21.30
  -1   7   1  687.13   20.80
   0  -7   1 1663.33   46.20
   0  -7   1 1720.43   42.70
   0   7   1 1729.03   47.30
   0   7  -1 1732.83   44.60
   0   7   1 1742.83   44.70
   0   7   1 1722.23   45.20
   1  -7   1  696.93   18.10
  -1  -7  -1  681.23   18.00
  -1   7  -1  652.03   22.10
  -1   7  -1  682.63   20.80
   1   7   1  687.73   19.80
   1   7   1  675.23   21.60
   1   7   1  657.73   20.40
  -1   7  -1  653.03   21.70
   2  -7   1  761.22   20.40
  -2  -7  -1  780.52   20.10
  -2   7  -1  754.22   23.10
  -2   7  -1  788.32   24.10
   2   7   1  737.73   21.30
   2   7   1  773.22   23.40
   2   7   1  741.13   22.20
   3  -7   1  246.48    8.20
  -3  -7  -1  234.88    7.90
  -3   7  -1  260.17   12.70
   3   7   1  240.88    9.40
  -3   7  -1  239.08   12.10
  -4  -7  -1 1440.56   36.80
   4  -7   1 1471.25   37.00
  -4  -7  -1 1540.75   39.80
  -4   7  -1 1447.56   40.50
   4   7   1 1438.76   38.00
  -4   7  -1 1477.85   40.90
  -5  -7  -1  876.21   22.80
  -5  -7  -1  894.41   24.40
   5  -7   1  849.02   23.40
   5   7   1  870.41   24.10
  -5   7  -1  884.21   27.20
   6  -7   1  581.64   16.90
  -6  -7  -1  565.24   17.20
   6   7   1  568.24   17.00
  -6   7  -1  566.04   20.10
   7  -7   1  699.83   19.50
  -7  -7  -1  682.53   19.70
  -7   7  -1  688.23   21.80
   7   7   1  705.53   19.90
  -8  -7  -1   18.00    2.70
   8  -7   1   24.00    2.80
   8   7   1   22.30    3.10
   9  -7   1    2.40    2.10
  -9  -7  -1    2.40    2.20
   9   7   1    2.90    1.60
  10  -7   1  189.28    6.50
 -10  -7  -1  185.18    6.70
  10   7   1  189.08    6.20
  -9  -8   1   17.40    3.10
   9  -8  -1    7.60    3.10
   9  -8  -1    9.20    2.00
   9   8  -1   11.50    1.70
   8  -8  -1   33.30    3.30
   8  -8  -1   27.50    3.60
  -8  -8   1   27.50    3.30
   8   8  -1   26.90    3.00
  -7  -8   1  323.27   10.80
   7  -8  -1  312.07   10.30
  -7   8   1  305.77   12.60
   7   8  -1  326.97   10.90
   6  -8  -1  280.37    9.30
  -6  -8   1  269.47   10.10
  -6  -8   1  238.68    8.20
   6   8  -1  277.17   10.00
  -6   8   1  276.47   12.00
   5  -8  -1  162.48    7.20
  -5  -8   1  170.98    6.60
  -5   8   1  165.38   11.70
   5   8  -1  166.08    7.80
  -4  -8   1 1242.58   32.00
   4  -8  -1 1259.17   32.30
  -4   8   1 1299.17   36.60
  -4   8   1 1235.08   35.70
   4   8  -1 1215.08   33.10
  -3  -8   1  568.94   16.20
   3  -8  -1  591.54   16.40
  -3   8   1  591.74   20.70
   3   8  -1  577.74   17.40
  -3   8   1  593.94   19.80
   2  -8  -1 1571.94   39.80
   2  -8  -1 1582.14   41.30
  -2  -8   1 1577.44   39.90
   2   8  -1 1568.44   41.30
  -2   8   1 1633.64   43.80
  -2   8   1 1592.74   42.80
   1  -8  -1  206.78    7.20
  -1  -8   1  212.78    7.30
   1   8  -1  214.38    9.40
  -1   8   1  200.58   10.20
  -1   8   1  187.58   12.70
  -1   8   1  209.98   12.00
   0  -8   1   24.70    3.30
   0  -8  -1   31.70    3.20
   0   8  -1   26.80    4.40
   0   8  -1   12.90   10.50
   0   8   1   25.90    5.20
   0   8   1   27.70    4.30
   0   8   1   31.20    6.20
  -1  -8  -1  215.38    7.30
   1  -8   1  214.78    7.40
  -1   8  -1  209.18   10.30
   1   8   1  206.88    9.40
  -2  -8  -1 1609.64   39.70
   2  -8   1 1575.54   39.60
  -2   8  -1 1583.34   42.70
  -2   8  -1 1548.55   43.50
   2   8   1 1594.04   41.20
   3  -8   1  564.34   15.90
  -3  -8  -1  567.24   15.80
  -3   8  -1  587.54   19.60
   3   8   1  554.24   17.10
  -3   8  -1  586.54   20.30
  -4  -8  -1 1260.67   31.90
   4  -8   1 1287.97   32.30
  -4   8  -1 1275.47   35.90
  -4   8  -1 1226.28   36.20
   4   8   1 1227.98   33.20
   5  -8   1  177.18    7.50
  -5  -8  -1  170.18    6.80
  -5   8  -1  169.58   12.00
   5   8   1  172.58    7.70
  -6  -8  -1  296.27   10.30
   6  -8   1  295.07    9.60
  -6  -8  -1  270.97   10.40
  -6   8  -1  258.27   11.90
   6   8   1  282.07   10.20
  -7  -8  -1  326.17   11.80
   7  -8   1  316.27   10.40
  -7  -8  -1  311.67   10.40
  -7   8  -1  316.37   12.40
   7   8   1  308.67   10.70
  -8  -8  -1   31.70    4.60
   8  -8   1   20.40    2.50
   8   8   1   30.80    3.00
  -9  -8  -1    3.90    3.00
   9  -8   1    9.70    2.10
   9   8   1   12.20    1.70
   8  -9  -1    6.60    2.10
   8  -9  -1   -0.20    2.30
   8   9  -1    3.00    1.50
  -7  -9   1   44.80    4.20
   7  -9  -1   35.50    3.60
  -7   9   1   46.50    6.00
   7   9  -1   37.30    3.20
   6  -9  -1  131.29    5.70
  -6   9   1  130.69    8.40
   6   9  -1  131.89    6.70
   5  -9  -1  132.59    5.70
  -5  -9   1  121.69    4.90
  -5   9   1  123.69    8.90
   5   9  -1  129.79    6.80
  -4   9   1    3.30    4.40
   4   9  -1    4.20    3.10
  -3  -9   1  164.88    6.60
   3  -9  -1  170.58    6.90
  -3   9   1  173.88   10.20
   3   9  -1  158.98    8.00
  -3   9   1  180.48   12.60
   2  -9  -1  476.25   13.80
   2  -9  -1  450.95   15.40
  -2  -9   1  470.05   13.70
  -2   9   1  471.05   18.70
   2   9  -1  475.45   15.40
  -2   9   1  497.85   17.00
  -1  -9   1  323.87   10.20
   1  -9  -1  324.77   12.00
   1  -9  -1  325.57   10.20
  -1   9   1  328.57   15.70
  -1   9   1  338.37   13.10
   1   9  -1  323.17   12.40
   0  -9   1  897.91   23.60
   0  -9  -1  900.21   23.60
   0   9  -1  890.81   26.00
   0   9   1  894.71   25.90
  -1  -9  -1  331.27   10.40
   1  -9   1  332.57   10.40
  -1   9  -1  346.27   13.40
   1   9   1  326.57   12.30
   2  -9   1  450.55   15.40
   2  -9   1  488.75   13.60
  -2  -9  -1  477.45   13.50
   2   9   1  448.86   15.20
  -2   9  -1  472.15   16.90
   3  -9   1  165.58    6.70
  -3  -9  -1  174.78    6.50
   3   9   1  160.38    8.00
  -3   9  -1  150.38   10.10
   4   9   1   -0.60    2.70
  -4   9  -1   -7.30    6.50
  -4   9  -1   -5.90    4.30
  -5  -9  -1  132.29    7.00
   5  -9   1  128.59    5.70
  -5   9  -1  119.49    8.90
   5   9   1  120.19    6.80
   6  -9   1  127.59    5.70
  -6  -9  -1  128.29    8.10
   6   9   1  135.89    6.70
  -6   9  -1  118.69    8.50
  -7  -9  -1   31.00    4.50
   7  -9   1   41.90    3.80
   7   9   1   33.20    3.10
   8  -9   1    5.60    2.80
   8  -9   1    5.00    2.10
   8   9   1    4.90    1.60
  -7 -10   1  168.88    7.70
   7 -10  -1  171.18    6.20
   7  10  -1  173.78    6.10
   6 -10  -1   25.10    3.20
  -6 -10   1   21.60    3.20
   6  10  -1   22.10    2.90
  -6  10   1   29.70    7.40
  -5 -10   1   15.70    2.20
  -5 -10   1   12.00    2.20
   5 -10  -1   10.50    2.00
   5  10  -1    9.10    2.10
  -5  10   1    9.50    4.90
   4 -10  -1  126.29    5.30
  -4 -10   1  121.39    4.80
  -4  10   1  120.69    9.10
   4  10  -1  124.89    7.00
  -3 -10   1   43.90    3.10
   3 -10  -1   42.00    3.40
   3  10  -1   43.90    5.50
  -3  10   1   49.20    7.40
  -3  10   1   48.10    6.00
  -2 -10   1   26.10    2.80
   2 -10  -1   37.10    3.10
   2 -10  -1   35.40    4.90
  -2  10   1   32.30    5.10
   2  10  -1   35.10    5.30
   1 -10  -1   67.29    3.70
  -1 -10   1   59.89    3.50
   1 -10  -1   80.99    6.50
  -1  10   1   61.19    7.30
   1  10  -1   71.19    6.70
   0 -10  -1   25.40    3.90
   0 -10  -1   18.50    2.60
   0 -10   1   22.60    2.60
   0  10  -1   18.40    4.10
   0  10   1   17.40    4.20
   1 -10   1   66.79    6.40
   1 -10   1   66.59    3.70
  -1 -10  -1   69.79    5.80
  -1 -10  -1   65.59    3.60
   1  10   1   69.09    6.60
  -1  10  -1   62.59    7.30
   2 -10   1   35.90    3.00
  -2 -10  -1   35.40    4.80
  -2 -10  -1   27.10    2.80
   2 -10   1   29.60    4.80
   2  10   1   35.10    5.30
  -2  10  -1   26.80    4.90
  -3 -10  -1   42.30    3.10
  -3 -10  -1   44.30    4.90
   3 -10   1   46.00    3.40
   3  10   1   38.60    5.30
  -3  10  -1   53.69    7.40
  -4 -10  -1  117.79    4.90
  -4 -10  -1  125.19    6.70
   4 -10   1  123.39    5.20
   4  10   1  125.29    6.90
   5 -10   1   13.10    2.00
  -5 -10  -1   10.30    2.10
  -5  10  -1    1.20    6.80
   5  10   1   10.90    2.10
   6 -10   1   21.10    3.30
  -6 -10  -1   20.80    2.50
   6  10   1   23.80    3.00
  -7 -10  -1  167.28    6.60
   7 -10   1  166.58    6.10
   7  10   1  168.58    6.00
   6 -11  -1    3.30    1.90
  -6 -11   1    1.10    2.30
   6  11  -1    4.30    1.60
  -5 -11   1   24.60    3.00
   5 -11  -1   25.10    3.30
   5  11  -1   24.40    3.00
   4 -11  -1  165.38    5.90
  -4 -11   1  164.38    6.20
   4  11  -1  166.98    6.60
   3 -11  -1    8.30    1.70
  -3 -11   1    6.40    2.00
  -3 -11   1   11.30    1.60
  -3  11   1   12.50    2.80
   3  11  -1   11.60    2.30
  -2 -11   1  214.58    6.80
  -2 -11   1  216.28    7.70
   2 -11  -1  212.78    7.10
   2 -11  -1  206.08    8.20
   2  11  -1  216.18    8.40
  -2  11   1  201.48    8.70
  -1 -11   1  120.69    5.60
   1 -11  -1  127.69    4.90
  -1 -11   1  119.49    4.70
   1 -11  -1  118.39    6.00
  -1  11   1  114.49    7.20
   1  11  -1  113.09    7.10
   0 -11   1   92.29    4.10
   0 -11  -1   89.59    5.20
   0 -11   1   98.69    5.20
   0 -11  -1   88.69    4.10
   1 -11   1  114.29    5.90
  -1 -11  -1  119.99    4.70
  -1 -11  -1  118.39    5.90
   1 -11   1  114.49    4.70
  -1  11  -1  125.89    9.10
   1  11   1  115.59    6.80
  -2 -11  -1  211.28    6.80
  -2 -11  -1  215.28    7.80
   2 -11   1  210.38    7.00
   2 -11   1  200.88    8.40
   2  11   1  209.58    8.30
  -2  11  -1  204.88    8.80
  -3 -11  -1    7.60    2.00
   3 -11   1    7.00    1.60
  -3 -11  -1   10.10    2.10
  -3  11  -1   11.70    2.90
   3  11   1    9.50    2.20
   4 -11   1  163.98    5.90
  -4 -11  -1  158.08    6.30
   4  11   1  164.98    6.60
   5 -11   1   22.00    3.00
  -5 -11  -1   20.30    3.00
   5  11   1   23.60    3.00
   6 -11   1    0.40    1.90
  -6 -11  -1    6.40    2.10
   6  11   1    1.60    1.70
  -3 -12   1  111.69    4.80
  -3 -12   1  112.09    4.80
   3 -12  -1  111.09    4.50
   3  12  -1  119.09    5.10
   2 -12  -1   12.50    1.80
  -2 -12   1    5.30    1.80
  -2 -12   1    9.60    1.80
   2  12  -1    9.70    2.10
  -2  12   1    9.90    2.40
  -1 -12   1   22.80    3.00
   1 -12  -1   25.90    2.80
  -1 -12   1   29.60    3.50
   1  12  -1   22.80    3.40
  -1  12   1   18.30    2.50
   0 -12  -1   92.49    4.80
   0 -12   1   94.79    4.00
   0 -12   1   90.29    4.60
   0  12  -1   95.49    5.00
   0  12   1   97.89    5.00
  -1 -12  -1   25.80    3.20
  -1 -12  -1   29.70    2.90
   1 -12   1   24.30    3.20
   1 -12   1   28.30    4.20
  -1  12  -1   27.60    3.60
   1  12   1   24.60    3.40
  -2 -12  -1    7.80    2.30
   2 -12   1    9.00    1.60
  -2 -12  -1   10.50    2.00
  -2  12  -1    5.60    2.30
   2  12   1   10.70    2.20
   3 -12   1  115.39    4.50
  -3 -12  -1  115.69    4.90
   3  12   1  115.39    5.10
  12   0  -2   39.80    3.20
  12   0  -2   49.30    2.90
  11   0  -2   44.30    3.00
 -11   0   2   51.29    4.60
 -10   0   2   89.09    5.70
  10   0  -2   79.19    4.10
  -9   0   2  342.77   12.30
   9   0  -2  336.57   10.80
  -8   0   2  599.04   18.20
   8   0  -2  595.54   16.80
  -7   0   2  178.58    8.90
   7   0  -2  188.78    7.00
  -6   0   2  468.95   14.70
   6   0  -2  479.35   20.80
   6   0  -2  454.05   13.20
  -5   0   2 2615.64   62.09
   5   0  -2 2398.86   61.79
   5   0  -2 2590.54   68.79
  -4   0   2 2580.34   63.09
  -3   0   2    1.40    0.70
   3   0  -2    1.90    1.00
  -2   0   2 1460.75   35.70
   2   0  -2 1423.76   35.70
   0   0   2  823.32   20.60
   0   0  -2  879.81   20.90
   0   0   2  863.71   20.90
   2   0   2 1382.26   34.20
   2   0   2 1427.06   36.50
   3   0   2    0.60    1.30
   3   0   2    3.20    0.90
   4   0   2 2476.95   64.79
   4   0   2 2434.16   60.19
   5   0   2 2592.34   69.39
   5   0   2 2540.65   63.69
   6   0   2  466.85   20.40
   6   0   2  453.45   13.30
  -6   0  -2  477.65   14.20
  -7   0  -2  201.88    8.40
   8   0   2  606.34   17.30
  -8   0  -2  628.04   18.40
  -9   0  -2  336.07   12.00
   9   0   2  341.67   10.90
 -10   0  -2   92.19    5.60
  10   0   2   89.19    4.30
  10   0   2   90.99    9.50
 -11   0  -2   53.79    4.80
  11   0   2   49.00    3.10
  12   0   2   48.50    2.70
  12   0   2   49.60    3.00
  12  -1  -2   37.40    2.60
 -12  -1   2   31.10    3.10
  12  -1  -2   33.60    2.90
  12   1  -2   32.40    2.60
  11  -1  -2    2.80    1.50
 -11  -1   2    2.40    2.30
  11   1  -2    1.30    1.80
  11   1  -2    4.60    1.60
 -10  -1   2  576.14   17.10
  10  -1  -2  570.24   16.00
  10   1  -2  572.64   15.60
 -10   1   2  556.84   16.70
  -9  -1   2  376.56   13.20
   9  -1  -2  371.76   12.00
   9   1  -2  372.16   11.50
  -9   1   2  389.56   13.50
  -8  -1   2  417.26   14.10
   8  -1  -2  410.86   12.70
  -8   1   2  418.26   14.20
   8   1  -2  423.76   12.40
   7  -1  -2  992.90   26.30
  -7  -1   2  993.30   27.50
   7   1  -2 1005.10   26.00
  -7   1   2 1021.20   27.40
  -7   1   2 1009.30   28.80
   6  -1  -2  447.26   13.00
   6  -1  -2  450.75   21.20
  -6  -1   2  454.25   14.30
  -6   1   2  440.26   15.40
   6   1  -2  466.45   19.30
  -6   1   2  451.35   14.50
   5  -1  -2 1902.71   47.40
  -5  -1   2 2024.30   48.40
  -5  -1   2 1933.11   48.50
   5   1  -2 2009.20   50.69
   5   1  -2 1985.90   47.20
   5   1  -2 1658.23   56.59
  -4  -1   2  776.32   20.90
   4   1  -2  754.92   23.30
   4   1  -2  756.02   22.10
  -4   1   2  800.42   19.40
  -3  -1   2  494.55   13.80
  -3   1   2  488.45   12.80
   3   1  -2  472.85   14.90
  -2  -1   2 2986.90   73.69
   2   1  -2 2889.31   73.79
  -2   1   2 3006.80   73.99
  -2   1   2 3155.18   72.89
   2   1  -2 3082.59   73.99
  -1  -1   2 4170.08   98.49
  -1   1   2 3996.50   98.09
   0  -1   2 2393.56   58.59
   0   1   2 2463.45   57.99
   0   1  -2 2394.66   58.59
  -1  -1  -2 4105.69   98.49
   1   1   2 4033.60   97.49
  -2  -1  -2 3078.49   76.29
   2   1   2 3015.90   73.99
   2   1   2 3076.59   75.19
   3  -1   2  479.05   12.10
   3  -1   2  474.45   16.10
   3   1   2  486.75   15.10
   3   1   2  485.45   13.70
   4  -1   2  735.23   24.70
   4   1   2  782.22   21.40
   4   1   2  781.02   23.50
   5  -1   2 2062.49   58.39
  -5  -1  -2 1954.60   51.29
   5   1   2 2081.69   53.49
  -5   1  -2 2026.40   52.39
   5   1   2 2183.08   56.69
  -6  -1  -2  461.75   13.90
   6  -1   2  445.76   13.40
   6  -1   2  461.95   21.30
   6   1   2  464.25   19.30
   6   1   2  463.75   12.90
  -6   1  -2  450.55   14.10
  -7  -1  -2 1001.60   27.10
   7  -1   2  967.30   26.90
   7   1   2 1020.50   26.00
  -7   1  -2 1023.70   27.10
   8  -1   2  404.86   12.60
  -8  -1  -2  416.06   13.50
  -8   1  -2  398.16   13.40
   8   1   2  419.46   12.30
   9  -1   2  370.86   11.80
  -9  -1  -2  371.66   12.80
   9   1   2  378.16   11.40
  -9   1  -2  369.46   12.90
   9   1   2  352.86   14.50
  10  -1   2  570.24   15.80
 -10  -1  -2  583.44   16.80
  10   1   2  570.94   15.50
  10   1   2  517.55   20.00
 -11  -1  -2    4.30    2.40
  11  -1   2    3.20    1.50
  11   1   2    6.10    1.90
  11   1   2    2.00    1.40
  12  -1   2   34.30    2.50
  12  -1   2   35.20    2.50
 -12  -1  -2   29.20    4.60
  12   1   2   35.50    2.50
  12   1   2   36.80    2.60
 -12  -2   2   64.79    4.20
  12  -2  -2   67.59    3.30
  12   2  -2   63.49    3.10
 -11  -2   2  266.77    9.10
  11  -2  -2  270.27    8.40
  11   2  -2  273.67    8.80
  11   2  -2  264.77    7.90
 -10  -2   2   40.00    4.30
  10  -2  -2   46.80    3.50
  10   2  -2   46.50    4.80
  10   2  -2   38.30    3.00
  -9  -2   2  469.35   15.40
   9  -2  -2  467.85   14.10
   9   2  -2  443.76   17.10
   9   2  -2  469.65   13.30
   8  -2  -2  502.15   14.60
   8  -2  -2  482.05   17.00
  -8  -2   2  470.65   15.50
   8   2  -2  448.86   16.00
   8   2  -2  497.15   13.70
   7  -2  -2  135.79    6.20
   7  -2  -2  128.99   10.80
  -7  -2   2  138.39    7.20
  -7   2   2  139.69    8.90
   7   2  -2  137.19    5.50
  -7   2   2  141.19    9.00
  -6  -2   2 2220.78   56.09
   6  -2  -2 2219.98   54.99
  -6  -2   2 2294.87   57.19
  -6   2   2 2233.68   57.29
   6   2  -2 2214.08   60.79
  -6   2   2 2128.59   55.89
   6   2  -2 2258.47   54.49
  -5  -2   2  322.17   12.30
   5  -2  -2  313.57   10.00
  -5  -2   2  335.17   11.30
   5   2  -2  328.67    9.50
   5   2  -2  302.27   16.40
   5   2  -2  331.27   13.20
  -5   2   2  344.87   12.80
  -4  -2   2 1550.74   38.80
   4   2  -2 1437.86   40.40
   4   2  -2 1489.95   39.70
  -3  -2   2  863.21   23.10
   3   2  -2  846.72   24.20
  -3   2   2  859.11   20.90
   3   2  -2  852.91   23.00
  -2  -2   2 2113.49   51.79
   2   2  -2 2057.79   52.29
  -2   2   2 2117.39   50.09
   2   2  -2 2063.39   50.59
  -2   2   2 2107.59   52.09
   2   2  -2 1989.60   49.99
  -1  -2   2  324.77   10.10
  -1  -2   2  345.17    9.20
   1   2  -2  319.07    9.10
  -1   2   2  348.27    9.20
   1   2  -2  346.97   10.60
  -1   2   2  354.46   10.10
   1   2  -2  349.67    8.60
   0  -2   2   22.50    2.00
   0  -2  -2   20.80    2.00
   0  -2   2   25.20    1.50
   0   2   2   20.50    1.90
   0   2  -2   22.90    2.60
   0   2  -2   22.90    1.90
  -1  -2  -2  355.16    9.80
  -1  -2  -2  360.36   10.80
   1  -2   2  345.67    9.80
   1   2   2  346.17   10.10
  -1   2  -2  342.57   10.00
   1   2   2  370.36   10.30
   1   2   2  353.66    9.50
  -2  -2  -2 2125.09   51.99
   2  -2   2 2031.30   51.09
  -2  -2  -2 2202.68   54.39
   2   2   2 2162.58   52.59
   2   2   2 2084.09   52.59
   2   2   2 2091.89   51.59
  -3  -2  -2  828.72   21.70
  -3  -2  -2  812.62   25.60
   3   2   2  812.82   21.50
   3   2   2  841.12   23.10
   3   2   2  825.22   22.90
  -4  -2  -2 1551.64   38.00
   4   2   2 1446.56   39.70
   4   2   2 1462.35   40.10
  -5  -2  -2  344.07   10.80
   5  -2   2  320.17   16.10
   5   2   2  315.87    9.50
   5   2   2  335.67   13.30
   5   2   2  314.67   15.60
  -5   2  -2  332.17   12.50
   6  -2   2 2131.19   54.69
   6  -2   2 2127.19   65.89
  -6  -2  -2 2239.28   55.49
  -6   2  -2 2179.68   55.39
   6   2   2 2257.87   54.39
   6   2   2 2314.67   61.69
  -6   2  -2 2275.67   56.99
  -7  -2  -2  138.19    6.80
   7   2   2  139.59    5.40
  -7   2  -2  107.79    8.00
   7   2   2  134.29    7.00
   8  -2   2  475.25   14.50
  -8  -2  -2  489.05   15.40
   8   2   2  506.75   13.90
   8   2   2  469.65   16.60
   9  -2   2  465.95   14.10
  -9  -2  -2  474.45   15.20
   9   2   2  444.16   16.90
   9   2   2  474.95   13.50
  10  -2   2   46.00    3.50
 -10  -2  -2   36.40    4.20
  10   2   2   43.50    4.80
  10   2   2   40.10    2.90
  11  -2   2  268.87    8.30
 -11  -2  -2  271.07    9.10
  11   2   2  271.67    8.80
  11   2   2  264.47    8.00
  12  -2   2   64.09    3.20
 -12  -2  -2   64.79    4.20
  12   2   2   70.09    3.20
  12   2   2   62.99    3.10
 -12  -3   2   25.00    3.40
  12  -3  -2   32.40    2.70
  12   3  -2   30.60    2.30
  11  -3  -2    6.00    1.60
 -11  -3   2    5.20    2.10
  11   3  -2    5.10    1.50
 -10  -3   2   93.69    5.50
  10  -3  -2   93.29    4.70
  10   3  -2   91.99    4.20
  10   3  -2  101.89    5.90
   9  -3  -2 1072.79   30.50
  -9  -3   2 1106.89   30.30
   9  -3  -2 1121.59   29.30
   9   3  -2 1084.99   28.00
   9   3  -2 1095.49   29.40
   8  -3  -2   85.09    5.60
  -8  -3   2   92.29    6.50
   8   3  -2   92.99    6.20
   8   3  -2   88.29    4.50
  -8   3   2   77.79    8.50
  -7  -3   2 1583.94   40.90
   7  -3  -2 1481.65   40.70
   7  -3  -2 1527.35   39.70
   7   3  -2 1581.24   38.80
  -7   3   2 1608.64   42.60
   7   3  -2 1560.84   41.00
  -6  -3   2  300.07   10.70
  -6  -3   2  290.17    9.40
   6  -3  -2  290.87    9.60
  -6  -3   2  274.87   12.40
   6   3  -2  285.07    9.90
   6   3  -2  285.97   13.00
  -6   3   2  300.87   12.40
   6   3  -2  294.47    8.70
  -5  -3   2  495.35   14.10
  -5  -3   2  520.95   16.50
   5  -3  -2  489.55   14.30
  -5  -3   2  486.65   15.40
   5   3  -2  520.25   18.20
   5   3  -2  547.45   14.90
  -5   3   2  506.55   17.00
   5   3  -2  502.95   13.60
  -4  -3   2 2772.92   67.89
   4   3  -2 2762.62   67.39
   4   3  -2 2750.42   65.79
  -4   3   2 2477.85   67.49
  -3  -3   2 1342.07   34.60
  -3   3   2 1341.57   32.10
   3   3  -2 1276.57   36.40
  -3   3   2 1272.97   35.40
   3   3  -2 1295.97   33.30
   3   3  -2 1312.57   32.40
  -2  -3   2  324.07   10.40
   2  -3  -2  302.97   11.30
  -2  -3   2  309.87   10.50
  -2   3   2  319.97    9.00
   2   3  -2  327.87    9.10
   2   3  -2  312.07   11.80
  -2   3   2  305.57   10.80
  -1  -3   2  950.40   23.80
  -1  -3   2  926.91   24.70
   1  -3  -2  911.41   25.00
  -1   3   2  931.51   23.90
  -1   3   2  933.11   24.80
   1   3  -2  911.71   23.60
   1   3  -2  941.81   25.70
   1   3  -2  939.91   23.20
   0  -3   2  952.10   23.90
   0  -3  -2  954.70   25.00
   0  -3   2  943.71   24.60
   0  -3  -2  949.40   24.10
   0   3  -2  919.11   25.50
   0   3   2  939.11   25.40
   0   3  -2  936.81   24.00
   0   3   2  938.41   24.30
   0   3   2  940.81   24.50
  -1  -3  -2  932.11   25.10
  -1  -3  -2  937.71   24.00
   1  -3   2  958.50   23.90
   1  -3   2  865.21   24.40
  -1   3  -2  931.71   24.50
   1   3   2  944.91   24.90
  -1   3  -2  907.81   24.40
   1   3   2  936.51   23.60
   1   3   2  937.31   24.70
  -2  -3  -2  300.87   11.70
  -2  -3  -2  304.97    9.50
   2  -3   2  310.57    8.60
   2   3   2  298.67   10.90
   2   3   2  313.97    9.00
   2   3   2  322.17   10.00
  -3  -3  -2 1251.17   37.60
  -3  -3  -2 1312.07   33.30
   3   3   2 1265.67   35.10
   3   3   2 1262.97   33.90
   3   3   2 1309.87   32.40
  -4  -3  -2 2690.63   67.09
   4   3   2 2516.15   64.89
   4   3   2 2803.52   66.49
   4   3   2 2749.72   68.69
  -5  -3  -2  502.35   16.00
  -5  -3  -2  498.55   14.90
   5   3   2  521.95   17.80
   5   3   2  498.75   13.60
   5   3   2  528.05   15.20
  -5   3  -2  510.85   16.70
  -6  -3  -2  307.27   10.30
   6  -3   2  274.37   10.30
   6   3   2  296.27   10.40
  -6   3  -2  294.47   12.20
   6   3   2  294.17    8.80
   6   3   2  279.37   13.90
  -7  -3  -2 1573.04   41.20
   7  -3   2 1582.24   40.40
   7   3   2 1570.44   39.60
   7   3   2 1627.44   42.40
   8  -3   2   85.99    5.80
  -8  -3  -2   82.79    6.10
   8   3   2   85.69    4.50
   8   3   2   86.99    6.70
   8   3   2   95.49    6.00
   9  -3   2 1092.89   29.20
  -9  -3  -2 1108.69   30.20
   9   3   2 1129.59   28.40
   9   3   2 1080.39   31.70
   9   3   2 1087.69   29.50
  10  -3   2   90.59    4.70
 -10  -3  -2   92.39    5.30
  10   3   2   99.69    5.90
  10   3   2   92.79    4.00
  11  -3   2    1.90    1.60
 -11  -3  -2    2.30    2.00
  11   3   2    3.80    1.60
  11   3   2    5.60    1.50
 -12  -3  -2   28.40    3.40
  12  -3   2   31.30    2.50
  12   3   2   32.40    2.40
  11  -4  -2  174.98    6.00
 -11  -4   2  170.78    6.40
  11   4  -2  162.78    5.90
 -10  -4   2   38.50    3.90
  10  -4  -2   37.90    3.60
  10   4  -2   41.80    4.20
  -9  -4   2  250.07    9.50
   9  -4  -2  249.08    8.80
   9  -4  -2  236.48   11.60
   9   4  -2  248.88    9.30
   8  -4  -2  270.77    9.60
   8  -4  -2  229.18   11.30
  -8  -4   2  249.58   10.30
   8   4  -2  250.37    8.10
   8   4  -2  239.58    9.50
  -8   4   2  252.97   12.50
  -7  -4   2   23.30    3.80
   7  -4  -2   16.20    3.00
   7   4  -2   22.70    3.30
   7   4  -2   20.50    3.40
  -7   4   2   19.50    5.10
  -6  -4   2  240.68    9.60
   6  -4  -2  237.68    8.70
  -6  -4   2  238.08    8.30
  -6   4   2  242.08   11.50
   6   4  -2  241.18    9.30
   6   4  -2  243.38    7.60
   5  -4  -2   58.99    4.50
  -5  -4   2   64.19    5.50
  -5  -4   2   57.29    7.30
  -5  -4   2   62.69    4.20
  -5   4   2   84.49    7.90
   5   4  -2   59.69    3.70
  -4  -4   2 1504.15   39.30
  -4  -4   2 1505.75   38.20
  -4  -4   2 1538.75   41.10
   4  -4  -2 1481.15   38.10
   4   4  -2 1584.14   39.90
   4   4  -2 1591.34   38.40
  -4   4   2 1511.35   40.70
  -3  -4   2 2481.05   62.09
  -3  -4   2 2549.65   64.09
  -3   4   2 2523.55   64.29
   3   4  -2 2554.14   62.69
  -3   4   2 2505.05   65.49
   3   4  -2 2545.65   61.49
  -2  -4   2 1117.39   30.60
  -2  -4   2 1081.79   31.60
   2  -4  -2 1098.19   31.60
   2   4  -2 1167.28   29.10
   2   4  -2 1131.49   28.10
   2   4  -2 1092.99   32.80
  -2   4   2 1135.89   31.10
   1  -4  -2 9408.96  229.88
  -1  -4   2 9695.33  229.28
  -1  -4   2 8748.32  228.28
  -1   4   2 9724.13  229.48
   1   4  -2 9939.51  231.18
   1   4  -2 9482.55  227.58
  -1   4   2 9691.33  228.98
   0  -4  -2 6999.00  172.98
   0  -4   2 7245.88  172.28
   0  -4   2 7211.58  171.68
   0  -4  -2 7391.66  171.78
   0   4   2 6627.24  173.58
   0   4   2 7186.98  172.18
   0   4  -2 7168.48  171.78
   0   4   2 7120.29  172.88
   0   4  -2 7335.27  173.68
   1  -4   2 9999.00  229.38
   1  -4   2 9641.44  228.28
  -1  -4  -2 9329.47  228.58
  -1  -4  -2 9295.87  230.18
   1   4   2 9371.96  230.08
  -1   4  -2 9332.47  228.98
  -1   4  -2 9751.02  229.58
  -2  -4  -2 1066.29   32.40
   2  -4   2 1150.18   28.30
   2  -4   2 1088.79   31.20
  -2  -4  -2 1056.99   32.40
   2   4   2 1160.98   30.40
   2   4   2 1179.78   28.80
  -2   4  -2 1173.78   29.60
   2   4   2 1078.59   31.90
  -3  -4  -2 2495.05   60.89
  -3  -4  -2 2299.17   66.09
   3   4   2 2438.06   59.49
  -4  -4  -2 1522.65   40.30
  -4  -4  -2 1488.65   38.70
  -4   4  -2 1554.44   40.60
   4   4   2 1531.85   38.90
   4   4   2 1471.65   37.40
   4   4   2 1575.24   41.30
  -5  -4  -2   60.29    5.00
  -5  -4  -2   49.80    6.60
   5   4   2   49.50    6.50
   5   4   2   57.59    3.20
  -5   4  -2   59.99    7.10
   5   4   2   54.29    3.70
   6  -4   2  247.58    9.40
  -6  -4  -2  231.48    9.20
  -6   4  -2  251.77   11.50
   6   4   2  248.98    9.20
   6   4   2  230.08    9.30
   6   4   2  241.78    7.60
  -7  -4  -2   15.90    3.00
   7  -4   2   22.20    3.50
   7   4   2   23.10    3.50
  -7   4  -2   22.20    4.60
   7   4   2   20.70    3.00
   7   4   2   20.40    2.90
  -8  -4  -2  259.87   10.10
   8  -4   2  243.88    9.50
   8   4   2  261.57    8.20
   8   4   2  245.28   10.60
   8   4   2  248.08    9.60
   9  -4   2  249.58    8.80
   9   4   2  259.87    9.40
   9   4   2  255.77    7.70
   9   4   2  218.58   12.30
 -10  -4  -2   35.70    3.90
  10  -4   2   38.30    3.70
  10   4   2   39.10    2.70
  10   4   2   37.10    4.80
  11  -4   2  163.88    5.90
 -11  -4  -2  172.38    6.40
  11   4   2  158.38    5.60
  11   4   2  176.08    6.00
  11  -5  -2  158.88    5.50
 -11  -5   2  150.38    5.90
  11   5  -2  154.58    5.40
  10  -5  -2   43.90    3.60
 -10  -5   2   44.40    3.80
  10   5  -2   43.40    3.30
  -9  -5   2   55.89    4.50
   9  -5  -2   55.89    5.70
   9  -5  -2   46.10    4.00
   9   5  -2   56.79    4.70
  -8  -5   2  226.38    9.60
   8  -5  -2  215.88    8.90
   8  -5  -2  194.48   10.20
   8   5  -2  212.08    8.50
  -8   5   2  205.68   11.80
  -7  -5   2  221.38    9.50
   7  -5  -2  234.08    9.00
   7   5  -2  227.58    8.90
  -7   5   2  217.98   12.10
  -6  -5   2 1004.80   26.10
  -6  -5   2 1014.40   27.70
   6  -5  -2 1011.50   26.90
   6   5  -2  992.90   27.00
  -6   5   2 1024.20   30.20
  -5  -5   2  158.98    8.90
  -5   5   2  181.38   10.50
   5   5  -2  181.08    7.90
   4  -5  -2  355.26   10.70
  -4  -5   2  359.16   14.00
  -4  -5   2  361.56   12.20
  -4  -5   2  361.56   10.70
  -4   5   2  357.56   13.80
   3  -5  -2 1000.40   26.00
  -3  -5   2 1032.20   29.30
  -3  -5   2 1022.90   26.30
  -3   5   2 1060.79   30.90
  -3   5   2 1015.50   28.80
  -2  -5   2 2311.67   57.89
  -2  -5   2 2104.59   54.89
  -2  -5   2 2192.88   58.89
   2  -5  -2 2213.88   54.69
  -2   5   2 2349.86   59.39
  -2   5   2 2213.68   57.09
   2   5  -2 2329.17   55.89
  -2   5   2 2260.97   57.79
  -1  -5   2 1606.24   41.70
  -1  -5   2 1596.04   41.80
  -1   5   2 1575.34   42.50
   1   5  -2 1608.24   40.70
  -1   5   2 1567.34   42.70
   0  -5   2 2766.72   67.89
   0  -5   2 2712.93   67.89
   0  -5  -2 2652.53   69.59
   0   5  -2 2729.83   70.69
   0   5  -2 2748.53   67.89
   0   5   2 2566.74   69.69
   0   5   2 2807.22   68.49
  -1  -5  -2 1514.65   39.60
   1  -5   2 1654.13   42.50
  -1  -5  -2 1513.35   44.00
  -1  -5  -2 1607.14   41.80
   1  -5   2 1641.84   41.30
   1   5   2 1697.53   41.80
  -1   5  -2 1637.34   42.50
   1   5   2 1654.93   43.90
  -1   5  -2 1597.44   43.70
  -2  -5  -2 2313.77   58.59
   2  -5   2 2286.67   60.49
   2  -5   2 2274.07   56.79
  -2  -5  -2 2225.88   55.89
   2   5   2 2321.57   59.89
   2   5   2 2373.86   57.59
  -3  -5  -2 1027.00   26.00
  -3  -5  -2 1060.39   29.00
  -3  -5  -2  951.70   27.00
   3   5   2 1074.29   29.90
   3   5   2 1110.69   27.60
  -3   5  -2 1006.40   29.00
   3   5   2  980.60   25.60
  -4  -5  -2  367.56   10.30
  -4  -5  -2  340.97   13.60
  -4  -5  -2  364.26   11.70
   4   5   2  356.96   10.00
   4   5   2  367.36   11.40
  -4   5  -2  355.66   13.80
   4   5   2  355.26   13.80
   5  -5   2  178.88    8.10
  -5  -5  -2  185.98    6.80
   5   5   2  191.18    7.50
   5   5   2  184.98    6.30
   5   5   2  166.18    8.10
   6  -5   2 1010.70   27.20
  -6  -5  -2 1011.70   27.90
   6   5   2 1049.59   28.50
   6   5   2 1057.99   26.20
  -6   5  -2 1020.30   30.00
   6   5   2 1032.30   27.60
   7  -5   2  226.98    9.00
  -7  -5  -2  231.78    9.30
   7   5   2  211.68    8.80
  -7   5  -2  224.68   11.50
   7   5   2  218.18    9.70
   7   5   2  232.98    7.40
   8  -5   2  202.98    8.70
  -8  -5  -2  214.68    9.10
   8   5   2  216.78    7.20
   8   5   2  179.58   10.60
   8   5   2  224.28    8.60
   9  -5   2   60.59    4.40
  -9  -5  -2   56.59    4.60
   9   5   2   57.89    4.80
   9   5   2   54.99    3.20
 -10  -5  -2   45.70    3.80
  10  -5   2   53.89    3.90
  10   5   2   51.89    3.40
 -11  -5  -2  148.69    5.80
  11  -5   2  149.39    5.50
  11   5   2  155.78    5.40
  10  -6  -2  219.28    7.60
  10  -6  -2  243.58   11.60
 -10  -6   2  234.98    8.00
  10   6  -2  219.48    7.40
  -9  -6   2   62.29    4.40
   9  -6  -2   59.69    5.80
   9  -6  -2   75.89    4.40
   9   6  -2   67.19    4.90
   8  -6  -2 1340.77   35.80
   8  -6  -2 1349.36   36.50
  -8  -6   2 1384.36   36.30
  -8   6   2 1378.86   38.60
   8   6  -2 1421.46   36.00
   7  -6  -2   41.30    5.10
  -7  -6   2   47.30    5.70
   7   6  -2   49.80    5.00
  -7   6   2   31.50    5.70
   6  -6  -2  230.48    8.90
  -6  -6   2  233.68    9.60
  -6  -6   2  234.28    8.10
  -6   6   2  242.38   12.50
   6   6  -2  238.38   11.30
   6   6  -2  230.88    9.10
  -5  -6   2  504.35   16.00
  -5  -6   2  513.95   14.60
   5  -6  -2  524.85   15.10
   5   6  -2  500.55   16.20
   5   6  -2  520.45   15.60
  -5   6   2  533.95   18.90
   4  -6  -2  313.67   10.00
  -4  -6   2  330.37   11.90
  -4  -6   2  321.77   10.00
   4   6  -2  319.57   11.00
  -4   6   2  323.37   13.60
   4   6  -2  322.57   11.20
   4   6  -2  312.67   12.10
  -4   6   2  304.37   14.00
  -3  -6   2 1629.34   40.40
   3  -6  -2 1685.63   40.20
  -3   6   2 1579.94   46.00
  -3   6   2 1622.84   43.30
   3   6  -2 1613.34   41.20
  -3   6   2 1554.34   43.30
   2  -6  -2  307.57    9.10
  -2  -6   2  310.27    9.40
  -2  -6   2  306.97   12.60
  -2   6   2  305.97   13.00
  -2   6   2  283.47   12.20
   1  -6  -2  361.96   10.10
  -1  -6   2  339.57   10.40
  -1  -6   2  350.56   13.00
  -1   6   2  351.46   13.60
  -1   6   2  347.87   13.20
   0  -6   2   94.09    5.10
   0  -6  -2   95.59    4.20
   0  -6   2   89.29    6.40
   0   6   2  108.29    7.30
   0   6  -2   96.79    7.60
   0   6   2   89.99    6.10
   1  -6   2  317.87   10.50
   1  -6   2  349.57   12.00
  -1  -6  -2  338.17    9.80
   1   6   2  342.77   11.90
   1   6   2  364.76   12.50
  -2  -6  -2  301.17    9.10
  -2  -6  -2  299.37   12.40
   2  -6   2  310.87   10.90
   2  -6   2  295.57    9.80
   2   6   2  319.67   11.00
  -2   6  -2  313.67   14.00
   2   6   2  313.07   13.80
   2   6   2  308.97   10.60
  -3  -6  -2 1663.93   40.30
   3  -6   2 1588.74   40.40
  -3  -6  -2 1630.64   41.40
  -3   6  -2 1614.14   43.40
   3   6   2 1630.04   41.10
   3   6   2 1685.73   42.70
   3   6   2 1659.83   46.30
   3   6   2 1553.94   41.40
  -3   6  -2 1622.44   43.60
  -4  -6  -2  322.27   11.30
   4  -6   2  312.07   10.10
  -4   6  -2  281.77   15.00
   4   6   2  314.17   10.30
   4   6   2  295.67   10.70
   4   6   2  315.87   11.00
   4   6   2  321.17    9.40
  -4   6  -2  316.87   13.70
  -5  -6  -2  497.65   14.10
  -5  -6  -2  504.55   15.60
   5  -6   2  491.55   14.90
  -5   6  -2  531.65   18.20
   5   6   2  517.65   16.20
   5   6   2  524.25   15.50
   6  -6   2  214.58    9.00
  -6  -6  -2  229.28    9.30
   6   6   2  227.48    8.90
   6   6   2  226.78    9.90
  -6   6  -2  232.68   11.90
  -7  -6  -2   45.00    5.60
   7  -6   2   60.09    5.90
  -7   6  -2   51.09    7.90
   7   6   2   51.89    5.00
   8  -6   2 1367.26   35.60
  -8  -6  -2 1370.06   36.10
   8   6   2 1386.96   35.80
   9  -6   2   60.89    4.50
  -9  -6  -2   64.79    4.40
   9   6   2   58.29    6.40
  10  -6   2  217.08    7.40
 -10  -6  -2  205.78    7.40
  10   6   2  222.88    7.20
 -10  -7   2   48.60    3.80
  10  -7  -2   48.10    3.50
  10   7  -2   46.40    2.90
   9  -7  -2    8.70    2.00
  -9  -7   2   10.40    2.50
   9  -7  -2    9.20    3.00
   9   7  -2   11.10    1.80
  -8  -7   2   94.99    5.20
   8  -7  -2   92.59    7.20
   8  -7  -2   83.59    4.90
   8   7  -2   88.49    5.50
  -8   7   2   84.79    6.90
   7  -7  -2  262.67    9.30
  -7  -7   2  257.87    9.50
   7   7  -2  261.77    9.60
  -7   7   2  254.17   11.80
  -6  -7   2  312.87   11.50
   6  -7  -2  313.07   10.80
  -6  -7   2  302.47    9.80
   6   7  -2  310.17   10.90
   6   7  -2  283.67   11.70
  -6   7   2  316.27   14.60
  -5  -7   2 1359.16   36.10
   5  -7  -2 1367.66   35.50
  -5  -7   2 1385.06   34.90
   5   7  -2 1385.66   36.00
  -5   7   2 1367.86   39.30
   4  -7  -2  110.09    5.40
  -4  -7   2  103.29    5.10
   4   7  -2  100.19    7.30
   4   7  -2   96.29    6.40
  -4   7   2  105.09    9.60
  -4   7   2  121.19    9.60
  -3  -7   2  726.53   19.80
   3  -7  -2  737.43   19.70
  -3   7   2  762.02   23.60
   3   7  -2  716.23   20.50
  -3   7   2  734.03   23.00
   3   7  -2  743.83   20.80
   3   7  -2  724.63   20.70
  -2  -7   2  136.29    5.70
   2  -7  -2  142.39    5.50
   2  -7  -2  134.99    9.90
   2   7  -2  144.69    7.30
  -2   7   2  137.49    9.50
   2   7  -2  124.49    8.50
  -2   7   2  141.09    9.80
  -2   7   2  124.59    9.60
   2   7  -2  127.69    7.60
   1  -7  -2    6.10    1.80
   1   7  -2    4.90    3.40
  -1   7   2    4.40    4.20
  -1   7   2    6.80    4.30
  -1   7   2    3.20    3.10
   0  -7   2   16.40    2.40
   0  -7   2   10.90    3.80
   0  -7  -2   23.30    2.90
   0   7  -2   10.90    4.00
   0   7   2   20.00    4.60
   0   7   2   20.40    4.60
   0   7   2   20.70    3.70
   1  -7   2    5.90    2.20
  -1  -7  -2    8.60    1.90
  -1   7  -2    1.60    4.20
   1   7   2    6.10    3.50
   1   7   2    6.50    3.90
   1   7   2    1.90    3.00
  -2  -7  -2  139.39    5.40
   2  -7   2  140.59    6.00
  -2   7  -2  138.89    9.50
  -2   7  -2  175.38   12.00
   2   7   2  143.49    8.10
   2   7   2  124.29    7.30
   2   7   2  137.29    8.10
   3  -7   2  722.53   19.10
  -3  -7  -2  715.43   18.90
  -3   7  -2  723.23   22.60
   3   7   2  675.03   20.30
  -3   7  -2  723.53   23.00
   3   7   2  729.73   22.10
   3   7   2  690.83   20.10
  -4  -7  -2  100.69    4.90
   4  -7   2  109.19    5.80
  -4  -7  -2   98.49    8.30
  -4   7  -2  124.09   10.30
   4   7   2  109.19    7.70
   4   7   2  116.89    7.40
  -4   7  -2   96.79    9.30
   4   7   2  103.09    6.30
  -5  -7  -2 1343.27   34.20
  -5  -7  -2 1398.86   35.80
   5  -7   2 1342.77   34.90
  -5   7  -2 1372.96   38.40
   5   7   2 1355.56   35.60
  -6  -7  -2  310.27   11.40
   6  -7   2  303.77   10.80
  -6  -7  -2  312.67   11.50
  -6   7  -2  302.37   14.10
   6   7   2  316.17   10.80
  -7  -7  -2  263.47    9.60
   7  -7   2  258.57    9.30
  -7   7  -2  267.57   11.20
   7   7   2  269.57    9.80
  -8  -7  -2   84.09    5.10
   8  -7   2   82.59    5.00
   8   7   2   82.59    5.50
  -9  -7  -2   10.70    2.30
   9  -7   2    6.50    2.30
   9   7   2   10.40    1.80
 -10  -7  -2   44.90    3.80
  10  -7   2   52.29    3.70
  10   7   2   51.59    2.90
  -9  -8   2   36.20    4.80
   9  -8  -2   21.00    2.90
   9  -8  -2   31.20    3.20
   9   8  -2   27.40    2.60
   8  -8  -2  326.27   10.00
   8  -8  -2  317.77   10.30
  -8  -8   2  288.07   10.00
   8   8  -2  310.27    9.80
  -8   8   2  317.27   11.80
  -7  -8   2   60.59    5.70
   7  -8  -2   61.59    4.30
  -7   8   2   63.29    6.80
   7   8  -2   67.69    5.00
  -6  -8   2  473.65   13.40
   6  -8  -2  478.35   14.50
  -6  -8   2  495.35   15.80
  -6   8   2  493.45   17.60
   6   8  -2  501.25   15.10
   5  -8  -2  377.66   12.10
  -5  -8   2  361.76   11.20
  -5   8   2  371.16   16.20
   5   8  -2  373.96   12.40
  -4  -8   2  402.86   12.10
   4  -8  -2  413.66   12.50
  -4   8   2  386.66   16.40
   4   8  -2  400.76   13.20
  -4   8   2  402.86   15.80
   3  -8  -2    5.10    2.10
  -3  -8   2    4.10    2.00
   3  -8  -2   -6.60    7.50
  -3   8   2    1.00    4.90
   3   8  -2    2.60    2.80
  -3   8   2    1.40    4.20
   2  -8  -2  418.06   14.70
  -2  -8   2  434.46   12.60
   2  -8  -2  422.06   12.40
  -2   8   2  430.96   15.80
  -2   8   2  405.56   18.60
   2   8  -2  440.76   14.10
  -2   8   2  415.76   16.60
   1  -8  -2  311.37   11.60
   1  -8  -2  321.87    9.60
  -1  -8   2  309.87    9.80
  -1   8   2  279.07   14.80
   1   8  -2  305.57   11.70
  -1   8   2  325.77   12.80
  -1   8   2  315.97   13.80
   0  -8  -2    1.60    1.70
   0  -8   2    1.60    1.90
   0   8  -2    2.40    3.70
   0   8   2    4.70    3.50
   0   8   2    4.20    4.70
   0   8   2    8.40    4.90
   1  -8   2  308.87    9.60
  -1  -8  -2  321.27    9.50
   1   8   2  299.57   13.10
   1   8   2  298.07   11.50
   1   8   2  305.47   14.50
  -1   8  -2  292.47   12.50
   2  -8   2  425.66   12.30
  -2  -8  -2  439.26   12.20
   2   8   2  419.86   15.30
   2   8   2  407.96   13.90
  -2   8  -2  403.76   15.50
   2   8   2  412.96   16.90
   3  -8   2    1.10    2.10
  -3  -8  -2    1.60    1.80
   3   8   2    7.20    5.40
   3   8   2    2.00    2.80
  -3   8  -2   -1.60    6.40
  -3   8  -2    3.70    4.40
   3   8   2    8.10    5.10
   4  -8   2  408.06   12.20
  -4  -8  -2  412.06   11.90
  -4   8  -2  401.86   15.90
  -4   8  -2  398.76   16.90
   4   8   2  384.36   13.10
  -5  -8  -2  358.06   12.50
   5  -8   2  366.16   11.80
  -5   8  -2  369.26   16.10
   5   8   2  368.46   12.30
  -6  -8  -2  485.05   15.10
  -6  -8  -2  484.35   14.80
   6  -8   2  485.05   14.40
  -6   8  -2  489.35   16.80
   6   8   2  483.05   14.90
  -7  -8  -2   65.09    5.40
   7  -8   2   68.99    4.70
   7   8   2   63.79    5.10
  -8  -8  -2  310.87   10.10
   8  -8   2  309.77    9.90
   8   8   2  303.07    9.70
  -9  -8  -2   30.20    4.60
   9  -8   2   25.30    3.70
   9   8   2   30.10    2.70
   8  -9  -2   26.30    2.60
   8  -9  -2   19.20    2.20
   8   9  -2   22.00    2.50
  -7  -9   2   36.50    3.90
   7  -9  -2   44.10    3.60
  -7   9   2   38.60    4.70
   7   9  -2   36.40    3.10
  -6  -9   2   62.89    4.10
   6  -9  -2   62.89    4.20
  -6   9   2   64.59    7.10
   6   9  -2   60.99    5.00
  -5  -9   2   13.20    1.70
   5  -9  -2   10.00    2.00
   5   9  -2   12.70    3.10
  -5   9   2   20.40    4.30
  -4  -9   2  798.32   25.00
  -4   9   2  890.81   26.20
  -4   9   2  839.62   26.40
   4   9  -2  857.21   23.90
  -3  -9   2   95.79    5.00
   3  -9  -2   95.29    5.30
   3  -9  -2   82.49   10.70
   3   9  -2   98.49    6.50
  -3   9   2   94.59    8.70
  -3   9   2   88.09   10.90
   2  -9  -2  735.73   21.60
  -2  -9   2  722.13   19.80
   2  -9  -2  732.73   19.90
   2   9  -2  702.73   21.40
  -2   9   2  747.93   23.00
  -2   9   2  738.13   24.30
   1  -9  -2   39.00    4.60
  -1  -9   2   44.40    3.80
   1  -9  -2   47.90    3.80
  -1   9   2   32.00    4.70
  -1   9   2   43.50    7.10
  -1   9   2   25.00    8.20
   1   9  -2   43.60    6.00
   0  -9  -2   10.70    2.20
   0  -9  -2    9.70    3.40
   0  -9   2   11.10    2.40
   0   9   2   12.10    4.10
   0   9   2   12.90    6.00
   0   9   2    9.60    7.50
   0   9  -2    5.60    3.60
   1  -9   2   42.00    3.80
  -1  -9  -2   47.70    5.60
  -1  -9  -2   42.40    3.70
   1   9   2   50.39    6.20
  -1   9  -2   51.19    7.20
   2  -9   2  740.83   19.90
  -2  -9  -2  722.73   19.70
  -2   9  -2  759.22   23.20
   2   9   2  724.63   21.50
  -3  -9  -2   87.09    4.80
   3  -9   2   87.89    5.10
   3   9   2   92.29    6.40
  -3   9  -2   99.79    8.50
  -4  -9  -2  835.12   23.40
   4  -9   2  834.12   22.40
  -4  -9  -2  828.82   22.00
  -4   9  -2  834.22   25.90
   4   9   2  854.41   23.70
  -5  -9  -2   11.80    3.10
   5  -9   2   13.80    2.30
   5   9   2   15.60    3.10
  -5   9  -2    7.70    5.10
  -6  -9  -2   61.09    4.60
   6  -9   2   62.89    4.40
  -6   9  -2   61.19    7.90
   6   9   2   68.69    5.20
  -7  -9  -2   31.10    4.70
   7  -9   2   40.50    3.90
   7   9   2   40.60    3.30
   8  -9   2   28.50    3.80
   8  -9   2   24.30    4.30
   8   9   2   28.00    2.70
   7 -10  -2  158.28    5.80
  -7 -10   2  162.38    6.70
   7  10  -2  163.38    5.80
   6 -10  -2   72.49    3.90
  -6 -10   2   67.09    3.80
   6  10  -2   59.29    3.80
  -6  10   2   70.29    9.20
  -5 -10   2  189.58    6.10
   5 -10  -2  180.98    6.70
   5  10  -2  174.98    7.10
  -5  10   2  179.18    9.40
   4 -10  -2  109.09    5.00
  -4 -10   2  106.09    4.40
   4  10  -2  117.79    6.70
  -4  10   2  108.59    8.40
  -3 -10   2  127.59    4.90
   3 -10  -2  118.49    5.20
  -3  10   2  100.59    9.10
   3  10  -2  131.59    7.10
  -3  10   2  127.59    8.60
   2 -10  -2  118.79    8.40
   2 -10  -2  124.99    5.20
  -2 -10   2  123.29    4.90
  -2  10   2  120.09    8.40
  -2  10   2  128.29    9.80
   2  10  -2  129.99    7.50
  -1 -10   2   75.19    3.80
   1 -10  -2   74.49    4.00
   1 -10  -2   69.99    6.60
   1  10  -2   75.49    6.60
  -1  10   2   74.59    7.30
   0 -10  -2    3.20    1.60
   0 -10   2    0.60    1.60
   0 -10  -2    4.40    3.10
   0  10   2    6.80    6.40
   0  10  -2    1.10    3.60
   0  10   2    1.10    3.30
   1 -10   2   72.69    3.90
  -1 -10  -2   76.19    5.90
  -1 -10  -2   67.69    3.70
  -1  10  -2   72.69    7.40
   1  10   2   72.69    6.60
   2 -10   2  128.29    8.20
   2 -10   2  116.79    5.00
  -2 -10  -2  126.69    7.00
  -2 -10  -2  127.79    5.00
  -2  10  -2  133.89    9.00
   2  10   2  129.29    7.60
  -3 -10  -2  125.39    5.00
  -3 -10  -2  130.49    7.00
   3 -10   2  121.99    5.10
  -3  10  -2  138.29    9.20
   3  10   2  129.69    7.40
  -4 -10  -2  100.49    5.00
   4 -10   2  113.39    4.90
  -4 -10  -2  114.09    6.50
   4  10   2  110.39    6.50
  -5 -10  -2  183.18    7.00
   5 -10   2  178.58    6.60
   5  10   2  180.68    7.10
  -6 -10  -2   68.59    4.20
   6 -10   2   61.69    4.10
   6  10   2   67.09    4.00
   7 -10   2  149.79    5.90
  -7 -10  -2  142.29    6.50
   7  10   2  156.88    5.60
  -6 -11   2  108.49    4.70
   6 -11  -2  117.99    4.60
   6  11  -2  115.09    4.60
   5 -11  -2  123.19    4.90
  -5 -11   2  119.59    4.90
  -5  11   2  129.39   10.60
   5  11  -2  115.59    5.10
  -4 -11   2   57.89    4.90
   4 -11  -2   56.09    3.50
  -4 -11   2   63.59    3.70
   4  11  -2   47.20    4.00
  -4  11   2   59.99    6.70
  -3 -11   2   28.30    2.60
   3 -11  -2   31.20    3.00
  -3 -11   2   32.60    3.10
  -3  11   2   28.20    3.60
   3  11  -2   28.40    3.70
   2 -11  -2  141.59    6.80
   2 -11  -2  131.19    5.30
  -2 -11   2  136.89    5.00
  -2 -11   2  137.99    5.80
   2  11  -2  141.09    6.60
  -2  11   2  124.69    7.00
   1 -11  -2  128.59    6.20
  -1 -11   2  115.89    4.60
   1 -11  -2  118.99    4.90
  -1 -11   2  127.29    5.70
  -1  11   2  116.09    6.70
   1  11  -2  118.39    6.30
   0 -11  -2    0.00    2.30
   0 -11  -2    3.60    1.60
   0 -11   2    3.60    2.20
   0 -11   2    1.40    1.40
   0  11  -2    0.70    3.10
   0  11   2    0.90    2.70
   1 -11   2  110.09    4.60
  -1 -11  -2  119.39    5.80
   1 -11   2  119.89    5.70
  -1 -11  -2  121.09    4.80
   1  11   2  116.09    6.20
  -1  11  -2  128.19    6.80
  -2 -11  -2  133.49    5.10
   2 -11   2  123.79    5.00
  -2 -11  -2  128.49    5.90
   2 -11   2  146.19    6.90
  -2  11  -2  125.59    7.00
   2  11   2  128.99    6.30
  -3 -11  -2   31.70    3.40
   3 -11   2   33.10    2.90
  -3 -11  -2   36.00    3.80
   3  11   2   40.20    3.90
  -3  11  -2   28.30    4.50
  -4 -11  -2   63.39    4.00
   4 -11   2   62.19    3.60
   4  11   2   61.19    4.20
   5 -11   2  123.49    5.10
  -5 -11  -2  121.39    5.10
   5  11   2  130.69    5.30
   6 -11   2  117.09    4.80
  -6 -11  -2  122.69    5.00
   6  11   2  118.49    4.80
  -3 -12   2   48.70    3.60
   3 -12  -2   59.19    3.50
  -3 -12   2   56.29    3.40
   3  12  -2   56.99    3.70
   2 -12  -2   14.60    1.90
  -2 -12   2   18.00    2.60
  -2 -12   2   18.10    2.90
   2  12  -2   21.50    3.20
  -1 -12   2   57.69    3.60
   1 -12  -2   50.29    4.60
  -1 -12   2   54.29    3.40
   1 -12  -2   53.29    3.40
   1  12  -2   52.69    4.00
  -1  12   2   52.69    4.20
   0 -12  -2    7.00    1.80
   0 -12   2    4.50    2.10
   0 -12   2    3.50    1.70
   0 -12  -2    6.40    2.10
   0  12  -2    4.70    2.30
   0  12   2    4.70    2.20
  -1 -12  -2   53.59    3.80
  -1 -12  -2   52.89    3.80
   1 -12   2   56.89    4.60
  -1  12  -2   56.89    4.20
   1  12   2   53.59    4.10
   2 -12   2   13.30    1.70
  -2 -12  -2   12.00    2.00
   2  12   2   12.00    2.30
  -2  12  -2   15.50    2.50
   3 -12   2   56.59    3.40
  -3 -12  -2   64.89    3.70
   3  12   2   57.09    3.80
  12   0  -3    2.90    2.40
  12   0  -3    5.80    1.40
  11   0  -3  152.78    5.20
 -11   0   3  135.29    6.40
  10   0  -3  467.15   13.40
 -10   0   3  479.95   14.70
  -9   0   3 1250.57   33.20
   9   0  -3 1195.78   31.60
   8   0  -3  578.84   19.60
  -8   0   3  603.74   18.20
  -7   0   3  326.17   12.80
   7   0  -3  339.47   10.30
   7   0  -3  304.37   14.80
  -6   0   3  841.32   24.70
  -6   0   3  855.01   23.80
   6   0  -3  863.81   22.40
   6   0  -3  853.11   30.60
  -5   0   3 1484.35   37.40
   5   0  -3 1422.86   42.90
   5   0  -3 1421.56   36.60
  -5   0   3 1548.55   40.50
  -4   0   3 5874.21  141.69
  -3   0   3   97.19    4.30
  -2   0   3 1648.44   41.10
  -1   0   3 2295.77   55.79
  -1   0   3 2343.87   55.09
   1   0  -3 2205.98   55.09
   0   0   3    3.30    0.60
   0   0   3    2.20    0.50
  -1   0  -3 2247.48   54.89
   1   0   3 2187.58   54.29
  -2   0  -3 1573.14   41.70
   2   0   3 1611.14   41.00
   3   0   3   92.99    5.40
   3   0   3   89.19    3.70
   4   0   3 5759.32  145.09
   4   0   3 5920.31  140.69
   5   0   3 1418.06   41.80
  -6   0  -3  845.62   22.90
   6   0   3  845.02   22.30
   6   0   3  850.81   30.20
   8   0   3  608.44   17.00
  -8   0  -3  596.84   17.90
   9   0   3 1247.58   32.20
  -9   0  -3 1241.98   33.20
 -10   0  -3  484.35   14.20
  10   0   3  463.15   13.30
  10   0   3  437.56   18.00
 -11   0  -3  147.09    6.60
  11   0   3  143.49    5.30
  12   0   3    3.00    1.30
  12   0   3    3.00    1.30
 -12  -1   3  103.29    5.40
  12  -1  -3   97.79    4.20
  12  -1  -3  101.79    4.20
  12   1  -3  111.69    4.20
  11  -1  -3   60.59    3.30
 -11  -1   3   58.79    4.30
  11   1  -3   57.29    3.40
  11   1  -3   50.19    3.70
 -10  -1   3  118.89    6.20
  10  -1  -3  115.29    5.00
 -10   1   3  106.99    6.50
  10   1  -3  110.19    4.70
   9  -1  -3  411.06   15.20
  -9  -1   3  389.46   13.60
   9   1  -3  388.76   11.70
  -9   1   3  378.96   13.60
   8  -1  -3  101.69    5.40
  -8  -1   3   93.29    6.80
   8  -1  -3   73.89   10.20
  -8   1   3   94.89    7.20
   8   1  -3   88.39    4.80
  -7  -1   3  903.81   24.50
   7  -1  -3  873.51   23.00
   7  -1  -3  796.72   25.00
   7   1  -3  815.22   26.20
   7   1  -3  890.61   22.70
  -7   1   3  855.11   24.40
  -7   1   3  891.11   25.50
   6  -1  -3  744.03   19.40
   6  -1  -3  674.93   28.10
  -6  -1   3  736.53   20.70
   6   1  -3  723.43   25.90
  -6   1   3  696.53   20.70
  -6   1   3  734.03   21.90
   5  -1  -3 2193.88   53.79
  -5  -1   3 2135.69   54.99
  -5  -1   3 2185.88   55.29
   5   1  -3 2227.38   57.49
   5   1  -3 2177.68   53.49
   5   1  -3 2252.97   59.49
  -5   1   3 2152.78   56.19
  -4  -1   3  183.28    7.00
   4   1  -3  177.08    8.40
  -4   1   3  179.28    6.00
   4   1  -3  177.98    8.80
  -3  -1   3 2164.18   52.69
   3   1  -3 2019.70   53.39
  -3   1   3 2141.89   51.69
   3   1  -3 2082.49   53.09
  -2  -1   3 2363.96   58.49
   2   1  -3 2284.47   57.99
  -2   1   3 2403.56   58.39
   2   1  -3 2398.96   58.69
  -1  -1   3  112.29    4.60
   1  -1  -3  124.49    4.50
   1   1  -3  110.89    4.80
   1   1  -3  117.19    3.20
   1  -1   3  108.99    4.60
  -1  -1  -3  121.99    5.10
   1   1   3  119.69    4.40
   1   1   3  116.99    3.90
   1   1   3  121.99    4.20
   2  -1   3 2249.27   56.89
  -2  -1  -3 2135.69   58.69
   2   1   3 2276.47   54.79
   2   1   3 2176.48   54.49
   2   1   3 2362.26   56.09
   3  -1   3 1971.60   53.59
   3  -1   3 2078.69   49.30
  -3  -1  -3 1963.10   54.29
   3   1   3 2072.99   50.49
   3   1   3 2095.89   52.59
   4  -1   3  182.88    5.70
   4  -1   3  178.28    9.70
   4   1   3  175.58    8.50
   4   1   3  170.98    7.70
  -5  -1  -3 2091.19   54.29
   5  -1   3 2240.08   61.79
   5   1   3 2288.37   59.79
   5   1   3 2151.68   56.59
  -6  -1  -3  731.43   20.20
   6  -1   3  723.73   28.20
   6  -1   3  713.03   19.80
  -6   1  -3  757.62   20.30
   6   1   3  719.83   19.20
   6   1   3  714.63   26.00
   7  -1   3  909.21   24.60
  -7  -1  -3  899.91   24.90
  -7   1  -3  913.41   24.90
   7   1   3  927.71   23.90
   8  -1   3   89.99    5.40
  -8  -1  -3   95.79    6.20
  -8   1  -3   94.39    6.60
   8   1   3   91.39    4.80
  -9  -1  -3  397.26   13.50
   9   1   3  399.96   12.00
  -9   1  -3  405.76   13.60
   9   1   3  388.46   15.50
 -10  -1  -3  120.19    6.00
  10  -1   3  118.59    5.10
  10   1   3  112.89    4.80
 -11  -1  -3   62.69    4.30
  11  -1   3   52.59    3.20
  11   1   3   58.49    3.10
  11   1   3   59.19    3.80
  12  -1   3  104.89    3.90
 -12  -1  -3   98.89    5.70
  12  -1   3   98.79    4.10
  12   1   3  106.29    3.80
  12   1   3  108.09    4.20
  12  -2  -3   12.50    1.80
 -12  -2   3   14.50    2.50
  12   2  -3   17.90    2.10
  11  -2  -3   67.29    3.50
 -11  -2   3   61.29    4.30
  11   2  -3   62.39    3.70
  10  -2  -3  263.27    8.50
 -10  -2   3  242.88    9.40
  10   2  -3  265.87    9.50
  10   2  -3  243.38    7.70
   9  -2  -3  594.94   17.10
   9  -2  -3  546.05   18.60
  -9  -2   3  585.64   18.20
   9   2  -3  611.74   16.20
   8  -2  -3  855.21   25.00
  -8  -2   3  841.32   24.50
   8  -2  -3  874.81   23.40
   8   2  -3  856.71   22.50
  -7  -2   3  353.16   12.60
   7  -2  -3  353.76   14.00
   7  -2  -3  370.06   11.50
  -7   2   3  380.56   14.30
  -7   2   3  376.96   13.40
   7   2  -3  356.66   10.60
   7   2  -3  334.77   15.20
   6  -2  -3 1350.66   34.00
  -6  -2   3 1294.77   36.20
  -6  -2   3 1319.57   33.60
  -6  -2   3 1338.47   35.20
  -6   2   3 1329.77   36.40
  -6   2   3 1340.47   35.40
   6   2  -3 1365.36   33.30
   6   2  -3 1319.87   39.30
  -5  -2   3 2227.08   56.59
   5  -2  -3 2248.28   56.79
  -5  -2   3 2342.37   58.99
  -5  -2   3 2293.17   57.99
  -5   2   3 2393.76   59.29
   5   2  -3 2287.17   56.29
   5   2  -3 2399.36   60.89
  -4  -2   3 1370.16   35.80
   4   2  -3 1356.26   36.10
   4   2  -3 1329.67   37.70
  -3  -2   3 1255.27   32.20
   3   2  -3 1194.88   31.20
  -3   2   3 1215.08   30.40
  -3   2   3 1192.08   32.60
   3   2  -3 1196.48   33.00
  -2  -2   3  538.45   15.70
   2  -2  -3  538.65   16.20
   2   2  -3  540.55   13.60
   2   2  -3  547.55   13.90
   2   2  -3  553.64   16.40
  -2   2   3  540.15   15.80
  -1  -2   3 1518.05   39.30
  -1   2   3 1541.35   38.00
  -1   2   3 1575.54   38.80
   0  -2   3 1624.44   40.20
   0  -2   3 1545.15   38.60
   0  -2  -3 1601.74   40.00
   0   2   3 1563.04   40.20
   0   2   3 1576.94   39.30
   0   2  -3 1671.43   40.40
   0   2   3 1593.54   39.40
   1  -2   3 1513.65   37.20
   1   2   3 1460.15   37.50
  -2  -2  -3  555.24   17.40
   2  -2   3  550.34   14.50
   2   2   3  548.55   15.60
   2   2   3  536.05   15.40
   3  -2   3 1150.08   29.60
  -3  -2  -3 1139.39   35.00
   3   2   3 1177.98   31.60
   3   2   3 1214.78   30.50
   3   2   3 1295.87   32.40
  -4  -2  -3 1157.78   39.70
   4   2   3 1345.87   33.30
   4   2   3 1252.77   35.00
   4   2   3 1371.56   36.60
  -5  -2  -3 2306.27   57.09
   5  -2   3 2249.47   65.19
  -5   2  -3 2362.16   58.49
   5   2   3 2299.97   56.09
   5   2   3 2158.28   61.29
   5   2   3 2441.46   61.79
   6  -2   3 1277.27   44.10
  -6  -2  -3 1373.06   34.20
   6  -2   3 1264.17   33.50
   6   2   3 1294.27   35.20
  -6   2  -3 1281.87   33.90
   6   2   3 1315.87   39.60
   6   2   3 1365.56   32.90
  -7  -2  -3  367.86   12.20
   7   2   3  368.56   10.80
   7   2   3  358.16   13.00
   8  -2   3  872.61   23.40
  -8  -2  -3  871.31   24.20
   8   2   3  835.42   25.80
   8   2   3  864.81   22.70
   9  -2   3  604.84   17.20
  -9  -2  -3  582.74   18.00
   9   2   3  585.84   20.00
   9   2   3  595.94   16.50
  10  -2   3  248.68    8.50
 -10  -2  -3  254.47    9.30
  10   2   3  256.97    8.10
  10   2   3  271.87    9.70
 -11  -2  -3   51.49    6.00
  11  -2   3   62.69    3.50
 -11  -2  -3   60.09    4.10
  11   2   3   68.79    3.20
  11   2   3   68.69    3.80
 -12  -2  -3   17.20    2.40
  12  -2   3   16.80    2.30
  12   2   3   13.20    1.50
  12   2   3   16.90    2.20
  12  -3  -3   71.59    3.60
 -12  -3   3   68.79    4.00
  12   3  -3   77.09    3.20
  11  -3  -3  228.38    7.40
 -11  -3   3  235.88    8.10
  11   3  -3  225.28    7.50
  10  -3  -3  166.38    6.40
  10  -3  -3  168.38    8.70
 -10  -3   3  161.18    7.10
  10   3  -3  162.18    7.20
   9  -3  -3   83.39    5.70
   9  -3  -3   73.49    8.70
  -9  -3   3   82.09    6.70
   9   3  -3   79.29    4.80
   9   3  -3   79.09    5.70
   8  -3  -3  385.56   14.50
  -8  -3   3  394.06   13.80
   8  -3  -3  415.76   12.80
   8   3  -3  393.06   11.50
  -8   3   3  392.26   15.40
   8   3  -3  399.76   13.00
   7  -3  -3  463.95   15.50
  -7  -3   3  457.95   14.80
   7  -3  -3  463.35   13.80
   7   3  -3  448.86   12.60
   7   3  -3  432.86   16.80
   7   3  -3  436.16   14.10
  -7   3   3  446.76   16.50
  -6  -3   3  137.89    6.00
  -6  -3   3  129.49    9.70
   6  -3  -3  138.49    6.10
  -6  -3   3  116.59   10.60
   6   3  -3  144.59    5.30
  -6   3   3  131.79    9.80
  -5  -3   3  633.44   17.30
  -5  -3   3  640.64   19.80
   5  -3  -3  619.24   17.40
  -5  -3   3  633.64   18.70
  -5   3   3  625.14   20.00
   5   3  -3  660.53   19.60
   5   3  -3  631.94   16.60
   5   3  -3  658.13   17.80
  -4  -3   3  583.54   17.70
  -4  -3   3  537.15   15.40
  -4  -3   3  532.05   16.70
   4  -3  -3  537.25   15.30
  -4   3   3  547.35   17.80
   4   3  -3  594.04   16.30
   4   3  -3  580.04   15.10
  -3  -3   3 1511.95   38.80
   3  -3  -3 1372.86   40.20
  -3   3   3 1514.65   36.10
  -3   3   3 1422.76   39.30
   3   3  -3 1435.26   40.50
   3   3  -3 1489.75   36.60
   3   3  -3 1479.65   35.80
   2  -3  -3 1732.33   46.10
  -2  -3   3 1759.92   45.30
  -2   3   3 1817.12   43.60
   2   3  -3 1787.42   42.60
  -2   3   3 1734.63   45.50
   2   3  -3 1769.22   43.10
   2   3  -3 1745.63   46.50
  -1  -3   3 1161.48   30.70
  -1  -3   3 1177.38   29.00
   1  -3  -3 1227.98   31.00
   1   3  -3 1125.69   28.60
  -1   3   3 1146.49   30.40
   1   3  -3 1153.68   31.50
   0  -3  -3  125.89    5.60
   0  -3   3  138.49    4.40
   0  -3   3  133.49    5.40
   0   3   3  120.09    5.30
   0   3  -3  136.49    6.40
   0   3   3  121.19    5.70
  -1  -3  -3 1211.48   32.10
   1  -3   3 1173.78   30.70
  -1   3  -3 1212.78   31.30
   1   3   3 1175.88   31.10
   1   3   3 1218.28   31.50
  -2  -3  -3 1735.53   47.40
   2  -3   3 1766.62   43.80
   2   3   3 1797.42   45.30
   2   3   3 1794.42   43.90
   3  -3   3 1474.15   35.10
  -3  -3  -3 1384.76   42.10
   3   3   3 1482.05   36.50
   3   3   3 1468.75   38.20
   3   3   3 1403.16   39.10
  -4  -3  -3  535.45   16.20
   4   3   3  605.14   18.50
   4   3   3  616.04   16.50
   4   3   3  544.25   15.00
  -5  -3  -3  643.54   18.10
   5  -3   3  625.24   25.80
  -5   3  -3  637.04   19.90
   5   3   3  641.74   18.40
   5   3   3  639.34   16.80
   5   3   3  663.93   21.40
  -6   3  -3  133.79    8.60
   6   3   3  138.09    6.50
   7  -3   3  461.95   14.40
  -7  -3  -3  464.65   14.70
   7   3   3  468.95   13.20
   7   3   3  457.75   14.60
   7   3   3  489.15   15.70
  -8  -3  -3  397.06   13.40
   8  -3   3  395.66   12.80
   8   3   3  419.06   11.80
   8   3   3  411.46   13.10
   8   3   3  373.56   15.30
  -9  -3  -3   88.89    6.40
   9  -3   3   94.49    6.10
   9   3   3   76.59    8.10
   9   3   3   87.79    4.70
   9   3   3   86.79    5.90
  10  -3   3  156.78    6.30
 -10  -3  -3  158.38    6.90
  10   3   3  178.88    7.40
  10   3   3  163.08    5.70
 -11  -3  -3  213.58    7.70
  11  -3   3  229.18    7.20
  11   3   3  217.78    7.30
  12  -3   3   74.79    3.20
 -12  -3  -3   67.19    4.00
  12   3   3   74.69    3.40
  11  -4  -3    8.00    1.70
 -11  -4   3    7.20    1.90
  11   4  -3    7.90    1.50
  10  -4  -3   33.30    3.60
  10  -4  -3   36.00    4.10
 -10  -4   3   31.90    3.70
  -9  -4   3   38.00    4.40
   9  -4  -3   39.80    5.30
   9  -4  -3   38.40    3.80
   9   4  -3   39.80    4.60
   8  -4  -3  237.18    9.20
   8  -4  -3  237.18   10.90
  -8  -4   3  230.98   10.00
  -8   4   3  235.88   12.10
   8   4  -3  221.38    8.90
  -7  -4   3  352.96   12.70
   7  -4  -3  362.86   11.80
  -7   4   3  360.56   14.60
   7   4  -3  321.47   15.50
   7   4  -3  349.27   11.80
   7   4  -3  354.16   10.30
  -6  -4   3  547.95   15.20
   6  -4  -3  543.25   15.60
  -6  -4   3  548.95   16.60
   6   4  -3  542.95   16.00
  -6   4   3  538.75   18.60
   6   4  -3  532.55   14.40
   6   4  -3  484.95   17.30
  -5  -4   3  175.68    8.10
   5  -4  -3  180.48    6.80
  -5  -4   3  172.18    6.50
  -5  -4   3  164.18    9.80
  -5   4   3  178.58    9.90
   5   4  -3  172.48    6.20
  -4  -4   3  581.24   15.90
  -4  -4   3  571.14   17.10
   4  -4  -3  587.14   15.80
  -4  -4   3  575.84   18.60
  -4   4   3  572.84   18.40
   3  -4  -3 3307.87   82.09
  -3  -4   3 3311.97   82.39
  -3  -4   3 3547.34   85.59
  -3   4   3 3366.86   84.29
  -3   4   3 3460.05   86.59
  -2  -4   3 1780.32   45.30
  -2  -4   3 1689.93   44.10
   2   4  -3 1706.23   47.90
   2   4  -3 1683.23   42.90
  -2   4   3 1705.83   45.60
  -2   4   3 1780.32   43.80
  -1  -4   3 2732.83   66.59
  -1  -4   3 2738.63   68.09
   1   4  -3 2603.64   66.09
  -1   4   3 2711.43   68.19
  -1   4   3 2801.72   67.59
   1   4  -3 2687.73   69.69
   0  -4   3 1399.56   35.60
   0  -4   3 1385.06   34.30
   0  -4  -3 1325.17   36.30
   0   4   3 1344.27   37.10
   0   4   3 1336.77   35.90
   0   4  -3 1370.26   37.00
   0   4  -3 1361.46   34.70
   0   4   3 1375.56   35.40
  -1  -4  -3 2721.03   70.59
   1  -4   3 2776.12   68.69
   1  -4   3 2734.73   68.89
   1   4   3 2801.12   70.29
   1   4   3 2700.43   70.09
   1   4   3 2871.71   68.49
  -1   4  -3 2839.02   69.89
   2  -4   3 1746.03   43.90
  -2  -4  -3 1696.43   48.40
   2   4   3 1803.72   46.00
   2   4   3 1795.42   44.20
   3  -4   3 3573.74   85.29
   3   4   3 3580.84   88.99
   3   4   3 3506.55   86.79
  -4  -4  -3  578.94   16.90
   4   4   3  614.94   15.60
   4   4   3  605.34   19.30
   4   4   3  584.74   17.10
  -4   4  -3  599.14   18.90
  -5  -4  -3  188.18    7.60
   5   4   3  184.48    6.10
   5   4   3  181.48    7.20
   5   4   3  177.28   10.10
  -5   4  -3  187.58    9.80
  -6  -4  -3  540.75   16.30
   6   4   3  534.55   16.20
  -6   4  -3  586.84   18.50
   6   4   3  537.75   14.80
   6   4   3  544.95   16.80
  -7  -4  -3  368.26   12.30
   7  -4   3  358.46   12.10
   7   4   3  358.26   10.60
   7   4   3  352.46   12.00
   7   4   3  367.76   12.90
   8  -4   3  223.68    9.10
  -8  -4  -3  223.68    9.50
   8   4   3  237.68    7.70
   8   4   3  225.78    9.10
   8   4   3  220.08   10.20
   9  -4   3   40.00    4.20
  -9  -4  -3   36.10    4.20
   9   4   3   49.50    4.90
   9   4   3   40.60    3.00
   9   4   3   34.10    5.30
 -10  -4  -3   25.90    3.50
  10  -4   3   24.00    3.50
  10   4   3   26.70    2.50
  10   4   3   35.90    3.80
  11  -4   3    9.50    1.80
 -11  -4  -3    5.80    1.90
  11   4   3    4.30    1.60
  11   4   3    8.10    1.70
 -11  -5   3   49.90    3.60
  11  -5  -3   44.70    3.20
  11   5  -3   43.90    2.70
  10  -5  -3   76.99    6.30
 -10  -5   3   83.79    4.70
  10  -5  -3   92.19    4.50
  10   5  -3   84.59    4.20
   9  -5  -3  204.08    7.90
   9  -5  -3  234.68   10.20
  -9  -5   3  204.08    8.30
   9   5  -3  211.38    8.30
   8  -5  -3   76.59    5.90
  -8  -5   3   79.19    6.50
   8  -5  -3   74.39    7.60
   8   5  -3   74.79    5.40
  -8   5   3   67.09    8.70
  -7  -5   3  605.34   18.30
   7  -5  -3  587.54   17.30
   7   5  -3  575.14   17.20
  -7   5   3  570.14   20.40
   6  -5  -3  941.61   24.80
  -6  -5   3  928.81   25.60
  -6  -5   3  925.61   24.00
   6   5  -3  882.41   25.10
   6   5  -3  896.21   24.80
  -6   5   3  902.01   27.90
  -5  -5   3   34.50    3.80
  -5  -5   3   38.90    5.50
   5  -5  -3   38.10    4.10
  -5   5   3   41.60    5.80
   5   5  -3   52.69    5.70
   5   5  -3   41.90    4.60
   5   5  -3   37.90    5.10
   4  -5  -3  434.36   12.50
  -4  -5   3  419.96   16.20
  -4  -5   3  429.96   14.00
  -4  -5   3  424.76   12.50
  -4   5   3  453.75   15.70
  -3  -5   3  124.89    7.80
   3  -5  -3  136.19    5.40
  -3  -5   3  116.19    8.50
  -3   5   3  133.49    8.20
  -3   5   3  144.59    8.50
   2  -5  -3   77.59    3.90
  -2  -5   3   65.99    4.80
  -2  -5   3   71.39    8.30
  -2  -5   3   69.09    5.80
  -2   5   3   81.59    7.30
  -2   5   3   80.39    8.20
   1  -5  -3  227.58    7.00
  -1  -5   3  227.58    9.30
  -1  -5   3  221.68    9.40
  -1   5   3  211.88    9.60
  -1   5   3  224.48    9.90
  -1   5   3  215.68   11.20
   0  -5   3  221.98    9.00
   0  -5   3  227.08    8.60
   0  -5  -3  206.38    6.90
   0   5  -3  200.58   12.80
   0   5  -3  240.98    8.90
   0   5   3  222.48    9.30
   1  -5   3  228.98    9.60
   1  -5   3  227.28    8.40
  -1  -5  -3  220.68    7.00
   1   5   3  224.78   10.30
  -1   5  -3  219.28   12.00
   1   5   3  233.48    8.80
   2  -5   3   68.39    9.00
   2  -5   3   76.39    4.60
  -2  -5  -3   83.89    4.00
   2   5   3   78.59    5.10
   2   5   3   89.29    5.00
   2   5   3   83.49    5.90
  -3  -5  -3  124.89    5.00
  -3  -5  -3  129.79    7.30
   3   5   3  137.99    5.80
   3   5   3  131.29    7.60
  -3   5  -3  130.39   10.00
   3   5   3  130.09    4.70
  -4  -5  -3  456.25   13.60
  -4  -5  -3  429.46   12.20
   4   5   3  423.46   16.40
   4   5   3  456.35   13.70
  -4   5  -3  452.05   16.00
   4   5   3  433.36   11.90
  -5  -5  -3   36.40    4.80
   5   5   3   38.00    3.80
   5   5   3   40.20    3.00
  -5   5  -3   42.40    6.10
   5   5   3   46.80    5.70
   6  -5   3  885.41   24.90
  -6  -5  -3  916.31   25.40
   6   5   3  959.00   23.90
  -6   5  -3  920.61   27.60
   6   5   3  943.61   25.30
   6   5   3  948.71   26.40
  -7  -5  -3  583.14   17.50
   7  -5   3  563.44   16.90
   7   5   3  574.04   17.00
   7   5   3  566.34   18.50
   7   5   3  579.54   15.60
  -8  -5  -3   86.39    6.20
   8  -5   3   81.59    6.30
   8   5   3   79.09    4.30
   8   5   3   77.39    5.50
   8   5   3   65.49    8.00
  -9  -5  -3  204.08    8.10
   9  -5   3  211.18    7.80
   9   5   3  204.58    6.60
   9   5   3  212.68    8.20
 -10  -5  -3   83.59    4.60
  10  -5   3   81.19    4.40
  10   5   3   85.69    3.90
  10   5   3   77.29    4.10
  11  -5   3   47.20    3.30
 -11  -5  -3   45.10    3.50
  11   5   3   57.29    3.00
  10  -6  -3   58.09    5.60
 -10  -6   3   70.09    4.20
  10  -6  -3   79.69    4.00
  10   6  -3   77.49    3.70
   9  -6  -3   94.09    6.10
   9  -6  -3   94.29    4.80
  -9  -6   3   94.89    5.10
   8  -6  -3  237.88   10.30
   8  -6  -3  232.18    8.50
  -8  -6   3  223.48    8.80
  -8   6   3  222.08   10.80
   8   6  -3  223.68    8.70
   7  -6  -3  265.27    9.90
  -7  -6   3  251.07   10.30
  -7   6   3  253.57   13.10
   7   6  -3  254.17   13.20
   7   6  -3  245.98    9.40
  -6  -6   3  852.91   24.40
   6  -6  -3  885.01   23.80
  -6  -6   3  856.11   22.80
   6   6  -3  859.01   23.80
  -6   6   3  855.61   27.20
  -5  -6   3  118.09    5.50
  -5  -6   3  110.29    7.30
   5  -6  -3  114.09    5.90
  -5   6   3  136.49    9.70
   5   6  -3  117.29    6.60
   5   6  -3  113.49    7.70
   4  -6  -3  243.78    8.20
  -4  -6   3  250.47   10.60
  -4  -6   3  237.68    8.00
   4   6  -3  228.48    9.20
   4   6  -3  215.68    9.70
  -4   6   3  222.98   12.40
  -4   6   3  225.88   11.60
   4   6  -3  241.88    9.50
  -3  -6   3  583.04   15.80
   3  -6  -3  583.94   15.60
  -3   6   3  564.24   20.80
  -3   6   3  574.44   18.90
   3   6  -3  530.95   17.00
   3   6  -3  567.04   17.10
  -3   6   3  543.15   19.40
   3   6  -3  582.14   16.90
  -2  -6   3 1341.77   34.00
   2  -6  -3 1367.46   33.70
  -2  -6   3 1331.57   37.80
  -2   6   3 1324.27   39.00
  -2   6   3 1367.56   36.70
  -1  -6   3  505.05   16.90
  -1  -6   3  485.45   13.90
   1  -6  -3  497.35   13.40
  -1   6   3  495.55   17.40
  -1   6   3  469.95   16.00
   0  -6   3 1299.07   35.80
   0  -6  -3 1319.67   32.60
   0  -6   3 1271.57   33.00
   0   6   3 1333.57   36.50
   0   6   3 1319.27   34.60
  -1  -6  -3  508.25   13.80
   1  -6   3  481.55   14.70
   1  -6   3  501.15   16.30
   1   6   3  545.75   16.80
   1   6   3  525.75   15.50
  -2  -6  -3 1362.76   34.20
   2   6   3 1427.56   37.00
   2   6   3 1358.36   40.40
  -2   6  -3 1300.57   37.50
   2   6   3 1406.76   35.30
  -3  -6  -3  575.84   15.10
  -3  -6  -3  564.54   16.70
   3   6   3  545.05   16.60
  -3   6  -3  539.75   18.90
   3   6   3  556.84   15.90
   3   6   3  566.74   17.20
  -3   6  -3  566.04   19.00
   3   6   3  562.54   20.80
   3   6   3  550.94   15.00
  -4  -6  -3  222.58    9.20
  -4  -6  -3  219.28    7.40
  -4   6  -3  200.88   13.40
  -4   6  -3  222.68   11.90
   4   6   3  237.98    9.20
   4   6   3  236.08    7.40
   4   6   3  219.88    8.90
  -5  -6  -3  111.69    6.60
  -5   6  -3  122.39    9.70
   5   6   3  109.89    6.80
   5   6   3  120.09    6.60
  -6  -6  -3  899.61   24.00
  -6  -6  -3  821.62   24.20
   6  -6   3  837.82   23.30
   6   6   3  847.02   22.00
   6   6   3  869.81   23.60
   6   6   3  850.31   25.20
  -6   6  -3  855.81   26.20
  -7  -6  -3  254.77   10.00
   7  -6   3  260.67   10.10
   7   6   3  258.37    8.10
   7   6   3  229.08   11.70
   7   6   3  250.37    9.50
  -8  -6  -3  224.28    8.50
   8  -6   3  214.98    8.30
   8   6   3  232.38    8.80
   9  -6   3   92.29    5.00
  -9  -6  -3   89.59    5.00
   9   6   3   97.59    4.90
 -10  -6  -3   71.49    4.30
  10  -6   3   80.29    6.50
  10   6   3   76.69    3.70
 -10  -7   3  198.38    6.80
  10  -7  -3  194.58    7.40
  10  -7  -3  199.48    6.60
  10   7  -3  205.58    6.40
   9  -7  -3  100.49    5.60
  -9  -7   3   91.09    5.00
   9  -7  -3   95.89    4.80
   9   7  -3   97.19    4.40
   8  -7  -3    3.60    2.20
   8  -7  -3    0.40    3.50
  -8  -7   3    5.20    2.40
  -8   7   3    4.30    3.40
   8   7  -3    9.80    2.60
   7  -7  -3  128.89    6.20
  -7  -7   3  134.59    6.60
   7   7  -3  134.49    6.80
  -7   7   3  133.49    8.50
   6  -7  -3  148.69    7.10
  -6  -7   3  141.19    8.00
  -6  -7   3  132.89    6.10
   6   7  -3  121.49    7.80
   6   7  -3  132.59    6.80
  -6   7   3  142.39   10.70
  -5  -7   3    2.70    3.90
   5  -7  -3    5.60    2.40
  -5   7   3    4.90    4.80
   5   7  -3    5.50    3.60
   5   7  -3    4.10    2.70
   4  -7  -3   16.70    2.50
  -4  -7   3   10.50    2.20
  -4   7   3    8.60    5.20
   4   7  -3   16.50    3.40
  -4   7   3    4.00    4.70
   4   7  -3    8.10    3.50
   4   7  -3   11.20    3.30
  -3  -7   3  163.88    6.50
   3  -7  -3  169.68    6.50
   3   7  -3  169.58    7.90
  -3   7   3  151.08   11.40
   3   7  -3  171.58    8.30
  -3   7   3  172.98   10.60
  -3   7   3  159.28   10.50
   3   7  -3  161.18    7.90
   2  -7  -3   46.00    3.50
  -2  -7   3   40.80    3.80
   2  -7  -3   41.80    5.90
   2   7  -3   45.70    5.70
  -2   7   3   33.60    5.00
   2   7  -3   49.30    7.00
   2   7  -3   43.00    5.70
  -2   7   3   43.70    7.20
  -2   7   3   47.90    6.30
  -1  -7   3  632.84   19.40
   1  -7  -3  709.73   18.10
   1  -7  -3  668.13   20.00
   1   7  -3  669.33   19.90
  -1   7   3  706.03   20.90
   1   7  -3  685.83   19.20
  -1   7   3  679.53   23.30
   0  -7   3  271.77    9.00
   0  -7  -3  275.57    8.50
   0   7   3  257.67   12.10
   0   7  -3  277.07   11.40
   0   7   3  284.27   11.60
   0   7   3  276.67   11.40
   1  -7   3  668.33   18.60
  -1  -7  -3  698.03   18.30
  -1   7  -3  668.03   20.90
   1   7   3  697.03   22.40
   1   7   3  710.03   20.40
   1   7   3  710.53   20.60
  -2  -7  -3   41.10    3.30
   2  -7   3   44.20    4.70
   2   7   3   39.90    5.60
   2   7   3   40.60    5.90
  -2   7  -3   53.29    6.40
   3  -7   3  156.98    7.10
  -3  -7  -3  166.28    6.00
   3   7   3  162.58    7.90
  -3   7  -3  143.59   12.90
   3   7   3  167.88    7.70
  -3   7  -3  159.88   10.20
   3   7   3  152.08    8.50
   4  -7   3   12.00    3.10
  -4  -7  -3   10.10    2.40
  -4  -7  -3   13.90    4.30
   4   7   3   14.10    3.40
  -4   7  -3   14.10    5.10
   4   7   3    4.50    2.90
  -4   7  -3   13.90    5.70
   4   7   3   12.70    3.40
  -5  -7  -3   -2.90    3.40
   5  -7   3    4.10    3.20
  -5  -7  -3    6.70    3.80
   5   7   3    2.50    2.60
  -5   7  -3   12.80    5.60
   5   7   3    6.20    3.20
   5   7   3    5.90    4.20
   6  -7   3  138.19    7.50
  -6  -7  -3  130.19    7.50
  -6  -7  -3  143.59    8.00
   6   7   3  125.89   11.40
   6   7   3  142.39    7.00
  -6   7  -3  134.69   10.40
   6   7   3  138.09    7.60
   7  -7   3  133.19    6.30
  -7  -7  -3  119.69    6.20
   7   7   3  119.49    6.50
   8  -7   3   12.30    2.60
  -8  -7  -3    8.00    2.30
   8   7   3    4.10    2.40
  -9  -7  -3   93.69    4.90
   9  -7   3   89.69    4.90
   9   7   3   96.99    4.40
  10  -7   3  201.98    6.70
 -10  -7  -3  208.08    6.90
  10   7   3  203.68    6.50
   9  -8  -3   12.60    2.60
  -9  -8   3    8.10    3.40
   9  -8  -3   12.40    2.00
   9   8  -3   14.90    2.30
   8  -8  -3  158.88    6.20
   8  -8  -3  148.09    6.50
   8   8  -3  146.39    5.80
  -8   8   3  147.39    8.10
  -7  -8   3   38.60    5.50
   7  -8  -3   27.90    3.70
   7   8  -3   20.40    3.10
  -7   8   3   25.70    4.30
  -6  -8   3  229.58    7.50
   6  -8  -3  232.88    8.40
  -6   8   3  218.08   11.20
   6   8  -3  238.58    9.10
   5  -8  -3  295.07   10.20
  -5  -8   3  285.07    9.50
  -5   8   3  284.17   14.50
   5   8  -3  285.57   10.50
   5   8  -3  292.97   10.50
  -4  -8   3   84.19    4.90
   4  -8  -3   76.09    5.10
  -4   8   3   76.69    9.40
   4   8  -3   86.39    6.00
   4   8  -3   79.99    6.30
  -4   8   3   85.69    9.20
  -3  -8   3  221.68    7.90
   3  -8  -3  210.58    7.80
   3  -8  -3  190.98   15.90
   3   8  -3  224.58    9.00
   3   8  -3  208.18    9.10
  -3   8   3  223.88   11.50
  -3   8   3  222.18   12.50
   2  -8  -3  228.48    7.90
  -2  -8   3  225.98    7.90
   2  -8  -3  222.48   10.90
  -2   8   3  226.28   11.70
   2   8  -3  213.08    9.90
  -2   8   3  228.98   14.10
  -2   8   3  243.18   12.40
   1  -8  -3  138.29    5.60
  -1  -8   3  125.69    5.70
   1  -8  -3  133.29    8.00
  -1   8   3  126.49   10.50
  -1   8   3  121.69    9.50
   1   8  -3  131.49    8.00
  -1   8   3  130.59    9.00
   0  -8  -3  140.29    5.70
   0  -8   3  142.79    6.00
   0  -8  -3  140.89    7.90
   0   8   3  143.49   10.80
   0   8   3  144.79    8.70
   0   8   3  161.28    9.90
   0   8  -3  156.38    8.60
   1  -8   3  131.09    5.80
  -1  -8  -3  129.69    5.40
  -1   8  -3  130.19    8.70
   1   8   3  120.39    7.80
   1   8   3  137.29    9.10
   1   8   3  121.99    9.90
   2  -8   3  220.68    7.80
  -2  -8  -3  228.48    7.60
  -2   8  -3  234.18   11.70
   2   8   3  215.98   12.30
   2   8   3  213.08    9.60
   2   8   3  224.28   10.50
  -3  -8  -3  223.38    7.40
   3  -8   3  209.28    7.70
   3   8   3  200.58   10.30
   3   8   3  204.38    8.90
  -3   8  -3  220.58   11.60
   3   8   3  199.48   12.50
  -4  -8  -3   83.89    4.80
   4  -8   3   78.69    5.30
  -4  -8  -3   74.69    6.30
  -4   8  -3   84.89    8.80
   4   8   3   58.99   11.20
   4   8   3   81.09    5.80
   4   8   3   67.29    7.90
  -5  -8  -3  277.37   10.60
   5  -8   3  279.17   10.00
  -5   8  -3  283.67   14.20
   5   8   3  290.67   10.40
   6  -8   3  230.28    8.40
  -6  -8  -3  228.28    9.10
  -6  -8  -3  229.48    9.60
  -6   8  -3  240.98   10.80
   6   8   3  227.08    8.90
   7  -8   3   28.70    4.20
  -7  -8  -3   24.70    3.20
   7   8   3   29.10    4.30
   8  -8   3  156.88    7.60
  -8  -8  -3  155.18    6.60
   8  -8   3  147.89    6.30
   8   8   3  150.78    5.90
  -9  -8  -3   16.00    3.20
   9  -8   3   15.00    2.40
   9   8   3   10.10    1.70
   8  -9  -3   68.59    4.30
   8  -9  -3   82.19    4.10
   8   9  -3   80.09    3.80
  -7  -9   3  117.09    5.20
   7  -9  -3  115.09    5.20
   7   9  -3  113.89    5.10
  -7   9   3  116.89    7.30
  -6  -9   3   46.90    3.50
   6  -9  -3   50.69    3.90
  -6   9   3   49.10    6.70
  -5  -9   3    8.40    1.70
   5  -9  -3   12.50    2.10
   5   9  -3   15.70    3.30
  -5   9   3   15.20    4.50
   4  -9  -3  173.28    6.70
  -4  -9   3  177.28    6.40
  -4   9   3  171.28   10.30
  -4   9   3  189.28   10.20
   4   9  -3  182.18    8.10
  -3  -9   3  640.54   17.50
   3  -9  -3  607.94   20.40
   3  -9  -3  643.54   17.80
   3   9  -3  621.84   18.80
  -3   9   3  627.44   20.60
  -3   9   3  620.64   22.00
  -2  -9   3  113.29    5.50
   2  -9  -3   97.79    8.30
   2  -9  -3  111.39    5.70
   2   9  -3  108.99    7.00
  -2   9   3  123.79   10.70
  -2   9   3  113.59    8.60
   1  -9  -3  255.77    8.70
   1  -9  -3  254.47   10.50
  -1  -9   3  260.87    8.70
  -1   9   3  247.88   11.50
  -1   9   3  261.07   13.40
   1   9  -3  251.97   10.70
  -1   9   3  232.78   16.90
   0  -9  -3    3.80    3.20
   0  -9   3    0.30    1.90
   0  -9  -3    0.50    1.90
   0   9   3   -0.60    3.30
   0   9  -3   -0.90    3.40
   0   9   3    6.70    5.30
  -1  -9  -3  245.58    8.40
  -1  -9  -3  251.17   10.10
   1  -9   3  254.37    8.50
   1   9   3  270.17   13.00
  -1   9  -3  260.87   11.40
   1   9   3  235.48   16.10
   1   9   3  240.78   10.50
  -2  -9  -3   94.09    6.50
   2  -9   3  112.19    5.30
  -2  -9  -3  115.19    5.20
   2   9   3  102.99    7.40
  -2   9  -3  114.39    9.10
   2   9   3   96.89   13.70
   2   9   3   83.49    9.80
  -3  -9  -3  619.64   16.90
  -3  -9  -3  619.84   18.40
   3  -9   3  610.44   17.10
   3   9   3  613.94   18.60
  -3   9  -3  619.04   20.60
   4  -9   3  176.88    6.50
  -4  -9  -3  176.38    8.10
  -4  -9  -3  137.99    6.10
   4   9   3  173.68    8.00
  -4   9  -3  169.78   10.20
  -5  -9  -3    8.70    3.20
   5  -9   3    9.80    2.20
  -5   9  -3    1.50    6.70
   5   9   3    9.90    3.00
  -6  -9  -3   49.80    4.50
   6  -9   3   46.00    4.20
   6   9   3   51.29    6.10
  -7  -9  -3  116.89    6.10
   7  -9   3  101.69    5.40
   7   9   3  109.99    4.90
   8  -9   3   70.99    4.60
   8   9   3   76.89    3.70
  -7 -10   3  308.97    9.10
   7 -10  -3  307.07    9.20
   7 -10  -3  312.87    9.30
  -7  10   3  304.07   10.90
   7  10  -3  318.47    9.40
   6 -10  -3  230.98    7.60
  -6 -10   3  242.58    7.60
   6  10  -3  231.28    7.80
  -6  10   3  200.38   11.20
   5 -10  -3  209.38    7.30
  -5 -10   3  215.78    6.70
   5  10  -3  207.38    7.70
  -5  10   3  198.18   10.00
   4 -10  -3   47.00    3.50
  -4 -10   3   45.30    3.00
   4  10  -3   44.20    5.30
  -4  10   3   54.69    7.40
   3 -10  -3  513.05   14.80
  -3 -10   3  516.75   14.40
  -3  10   3  514.95   17.80
   3  10  -3  524.25   16.40
  -3  10   3  534.15   18.00
   2 -10  -3  266.17    8.60
   2 -10  -3  269.17   11.20
  -2 -10   3  267.77    8.40
  -2  10   3  246.28   11.90
   2  10  -3  268.07   10.60
  -2  10   3  260.27   11.70
   1 -10  -3  375.66   13.10
  -1 -10   3  365.26   10.90
   1 -10  -3  360.36   11.00
   1  10  -3  370.66   13.50
  -1  10   3  367.76   13.90
  -1  10   3  365.66   14.30
   0 -10  -3   95.49    4.50
   0 -10  -3  104.89    7.00
   0 -10   3   96.39    4.40
   0  10   3   70.59    9.20
   0  10  -3  100.79    7.80
   0  10   3   90.59    7.30
   1 -10   3  356.16   10.70
  -1 -10  -3  352.26   10.70
  -1 -10  -3  376.26   12.60
   1  10   3  352.76   13.10
  -1  10  -3  367.46   14.00
   2 -10   3  268.97    8.40
  -2 -10  -3  251.27    8.30
   2 -10   3  265.47   10.90
  -2 -10  -3  265.37   10.30
  -2  10  -3  280.47   11.90
   2  10   3  264.37   10.70
   3 -10   3  508.85   14.60
  -3 -10  -3  532.45   16.20
  -3 -10  -3  524.25   14.40
   3  10   3  530.55   16.40
  -3  10  -3  525.15   17.90
  -4 -10  -3   50.99    5.30
   4 -10   3   49.20    3.60
   4  10   3   41.50    6.20
  -5 -10  -3  214.48    7.80
   5 -10   3  210.38    7.30
   5  10   3  212.98    7.80
   6 -10   3  206.18    8.70
  -6 -10  -3  232.58    7.80
   6  10   3  238.28    7.90
   7 -10   3  296.57    9.10
  -7 -10  -3  300.27    9.70
   7  10   3  301.97    9.10
  -5 -11   3   39.30    3.10
   5 -11  -3   31.20    3.10
   5  11  -3   38.20    3.20
  -5  11   3   42.20    5.20
  -4 -11   3    1.80    1.90
   4 -11  -3    2.80    1.80
  -4  11   3   -3.20    5.30
   4  11  -3   -2.90    2.00
  -3 -11   3   86.19    3.70
   3 -11  -3   85.69    4.10
   3  11  -3   80.49    4.80
   2 -11  -3   88.59    6.00
  -2 -11   3   89.89    3.90
   2 -11  -3   90.39    4.10
  -2  11   3   63.19    9.80
  -2  11   3   74.49    5.50
   2  11  -3   98.89    5.40
   1 -11  -3  188.68    7.70
  -1 -11   3  196.78    6.40
   1 -11  -3  187.98    6.70
   1  11  -3  191.38    8.00
  -1  11   3  186.58    8.20
   0 -11  -3   78.09    4.00
   0 -11   3   80.19    3.70
   0 -11  -3   89.59    5.30
   0 -11   3   80.49    4.80
   0  11   3   80.69    5.60
   0  11  -3   83.19    5.60
   1 -11   3  187.08    7.20
  -1 -11  -3  188.38    6.40
  -1 -11  -3  190.58    7.60
   1 -11   3  192.18    6.40
   1  11   3  194.08    7.90
  -1  11  -3  195.08    8.40
   2 -11   3   84.59    3.90
  -2 -11  -3   89.99    4.90
   2 -11   3   88.39    6.20
  -2 -11  -3   83.79    4.30
   2  11   3   85.19    5.40
  -2  11  -3   88.29    5.90
  -3 -11  -3   81.19    4.60
   3 -11   3   87.69    4.00
   3  11   3   74.09    4.90
  -3  11  -3   86.79    5.60
   4 -11   3    0.20    1.70
  -4 -11  -3    0.50    1.90
   4  11   3   -1.90    2.00
   5 -11   3   38.00    3.50
  -5 -11  -3   37.90    3.30
   5  11   3   36.10    3.40
   3 -12  -3  313.97    9.20
  -3 -12   3  320.87    9.40
  -3 -12   3  313.17    8.90
   3  12  -3  323.27    9.80
  -2 -12   3    9.00    1.60
   2 -12  -3    7.00    1.90
  -2 -12   3    8.80    1.80
   2  12  -3    4.40    2.10
   1 -12  -3   53.79    4.50
  -1 -12   3   53.69    2.90
  -1 -12   3   60.29    3.60
   1 -12  -3   54.49    3.60
   1  12  -3   54.69    3.90
  -1  12   3   50.39    4.20
   0 -12   3   29.50    3.40
   0 -12  -3   29.90    3.70
   0 -12  -3   27.30    3.60
   0 -12   3   31.00    3.40
   0  12   3   33.10    3.70
   0  12  -3   29.10    3.60
   1 -12   3   58.19    3.10
  -1 -12  -3   50.49    4.50
  -1 -12  -3   55.59    3.80
  -1  12  -3   59.19    4.20
   1  12   3   51.69    4.10
  -2 -12  -3    4.50    1.80
   2 -12   3    5.10    1.60
   2  12   3    9.50    2.30
  -3 -12  -3  308.37    9.50
   3 -12   3  315.57    8.90
   3  12   3  309.17    9.70
  12   0  -4  110.39    4.30
 -11   0   4    1.20    2.80
  11   0  -4    3.00    1.80
 -10   0   4    9.30    2.90
  10   0  -4    5.50    1.80
  -9   0   4  115.39    7.40
   9   0  -4   88.09    9.50
   9   0  -4  106.49    5.40
  -8   0   4  260.67   10.80
   8   0  -4  260.97   12.40
   8   0  -4  273.07    9.10
   7   0  -4  142.89   10.40
  -7   0   4  159.18    8.20
   7   0  -4  151.48    6.20
   6   0  -4  637.04   25.80
   6   0  -4  662.73   17.70
  -6   0   4  654.93   19.40
  -6   0   4  654.33   20.60
  -5   0   4  597.14   18.20
   5   0  -4  598.54   16.50
  -5   0   4  647.74   17.80
  -4   0   4   49.80    3.70
  -3   0   4   94.09    4.50
  -2   0   4  511.25   15.40
  -2   0   4  575.54   15.50
  -1   0   4 3495.85   83.99
   0   0  -4  564.84   14.90
   0   0   4  580.64   14.30
   0   0   4  563.14   14.70
   1   0   4 3210.88   79.99
  -1   0  -4 3418.06   81.39
  -2   0  -4  477.35   17.60
   2   0   4  548.45   15.40
   3   0   4   89.19    5.40
   3   0   4   93.89    4.10
   4   0   4   52.69    4.10
   4   0   4   48.80    5.20
   5   0   4  652.13   22.80
  -5   0  -4  623.34   17.60
   5   0   4  623.04   18.90
   6   0   4  663.73   18.10
  -6   0  -4  676.53   18.60
   6   0   4  648.04   25.20
   7   0   4  149.69    6.90
  -7   0  -4  150.28    7.20
   8   0   4  251.77    8.80
  -8   0  -4  260.97    9.90
   9   0   4  113.59    5.60
  -9   0  -4  105.79    6.80
   9   0   4   93.39    8.60
 -10   0  -4    6.80    2.50
  10   0   4    6.40    1.60
  11   0   4    3.70    1.40
 -11   0  -4   -2.70    3.00
  12   0   4  103.79    4.10
  12   0   4  102.79    3.80
 -12  -1   4   69.59    5.10
  12  -1  -4   71.99    3.40
  12   1  -4   75.69    3.40
 -11  -1   4   93.79    5.10
  11  -1  -4   96.29    4.10
  11   1  -4   86.69    4.30
  11   1  -4   92.79    4.50
 -10  -1   4  351.96   11.90
  10  -1  -4  359.16   10.60
  10   1  -4  345.77   10.10
 -10   1   4  346.67   11.80
   9  -1  -4  464.25   13.80
  -9  -1   4  469.75   15.50
   9  -1  -4  451.25   16.00
   9   1  -4  442.56   16.20
   9   1  -4  449.86   13.20
  -9   1   4  480.75   15.60
  -8  -1   4  999.40   27.60
   8  -1  -4  966.30   25.90
   8  -1  -4  939.31   27.60
  -8   1   4  995.20   27.30
   8   1  -4  952.50   27.50
   8   1  -4  984.90   25.40
   7  -1  -4 1195.58   30.20
   7  -1  -4 1128.69   31.60
  -7  -1   4 1193.88   31.90
  -7   1   4 1137.39   32.00
   7   1  -4 1176.58   29.80
  -7   1   4 1209.18   32.90
   7   1  -4 1116.69   32.00
  -6  -1   4  369.06   12.00
  -6  -1   4  400.26   13.20
   6  -1  -4  371.66   11.60
  -6   1   4  391.36   14.60
   6   1  -4  405.36   11.40
   6   1  -4  414.86   18.10
  -6   1   4  383.96   13.40
  -5  -1   4 1384.26   35.40
   5  -1  -4 1450.65   35.40
  -5  -1   4 1438.56   36.90
  -5  -1   4 1521.95   37.60
  -5   1   4 1202.78   37.50
  -5   1   4 1388.86   37.70
   5   1  -4 1361.56   35.00
   5   1  -4 1494.45   40.90
  -4  -1   4 1755.12   45.00
   4   1  -4 1704.63   46.50
  -4   1   4 1757.42   43.90
  -3  -1   4 4148.38  101.29
  -3   1   4 4260.77  100.29
   3   1  -4 3963.40  101.29
   3   1  -4 4113.19  101.49
  -2  -1   4  760.22   20.70
  -2   1   4  738.13   20.30
   2   1  -4  756.12   20.90
  -1  -1   4 5621.34  136.49
  -1   1   4 5672.93  135.39
   0  -1  -4 1723.33   43.10
   0  -1   4 1777.12   41.90
   0  -1   4 1735.13   41.60
   0  -1   4 1740.63   43.50
   0   1   4 1730.13   42.30
   0   1  -4 1664.43   42.40
   0   1   4 1783.52   43.10
  -1  -1  -4 5518.45  133.79
  -2  -1  -4  744.03   22.40
   2  -1   4  703.93   21.30
   2   1   4  765.62   19.50
   2   1   4  781.72   20.80
   2   1   4  765.62   19.80
  -3  -1  -4 4048.29  105.29
   3  -1   4 4264.27  104.19
   3   1   4 4135.99  100.79
   3   1   4 4152.38  102.79
   4  -1   4 1779.82   42.40
   4  -1   4 1626.04   50.89
   4   1   4 1763.72   44.30
   4   1   4 1711.03   46.90
   5  -1   4 1491.45   44.30
  -5  -1  -4 1441.06   37.30
   5  -1   4 1432.46   36.60
   5   1   4 1516.55   42.50
   5   1   4 1468.65   40.10
   6  -1   4  384.36   19.80
  -6  -1  -4  396.96   12.20
   6  -1   4  380.66   12.30
   6   1   4  366.66   17.00
  -6   1  -4  405.96   12.40
   6   1   4  372.26   11.20
  -7  -1  -4 1173.98   31.30
   7   1   4 1195.58   30.30
   8  -1   4  995.40   26.30
  -8  -1  -4 1033.50   27.30
   8   1   4  957.50   29.30
  -8   1  -4  986.50   27.10
   8   1   4 1000.20   26.00
  -9  -1  -4  453.25   14.80
   9  -1   4  466.05   13.80
  -9   1  -4  451.55   14.70
   9   1   4  446.06   17.10
   9   1   4  459.15   13.30
 -10  -1  -4  360.46   11.70
  10  -1   4  351.36   10.80
  10   1   4  366.86   10.70
 -11  -1  -4   97.09    5.10
  11  -1   4   91.69    4.10
  11   1   4  100.79    4.00
  11   1   4   90.39    4.60
 -12  -1  -4   68.89    5.60
  12  -1   4   69.99    3.30
  12  -1   4   72.89    3.10
  12   1   4   68.69    3.30
  12   1   4   64.49    3.00
 -12  -2   4   32.00    3.90
  12  -2  -4   35.20    2.50
  12   2  -4   30.10    2.40
  11  -2  -4  133.19    4.90
 -11  -2   4  130.19    5.70
  11   2  -4  119.49    5.20
  10  -2  -4  132.79   11.60
  10  -2  -4  154.58    5.90
 -10  -2   4  145.19    6.90
  10   2  -4  144.69    6.80
  10   2  -4  140.99    5.40
   9  -2  -4  241.98   11.30
   9  -2  -4  240.98    9.10
  -9  -2   4  245.48   10.50
   9   2  -4  230.98    8.00
   8  -2  -4  734.33   20.20
  -8  -2   4  732.43   21.50
  -8   2   4  715.63   22.80
   8   2  -4  718.63   19.20
   8   2  -4  699.33   21.50
  -7  -2   4   35.30    5.30
   7  -2  -4   26.20    3.90
   7  -2  -4   22.00    4.90
   7   2  -4   34.30    5.90
   7   2  -4   23.60    3.30
  -7   2   4   26.50    4.90
   6  -2  -4  859.11   22.30
  -6  -2   4  866.51   22.10
  -6  -2   4  828.92   24.80
  -6  -2   4  836.32   23.70
  -6   2   4  840.72   24.90
   6   2  -4  854.21   21.50
   6   2  -4  728.33   26.60
  -6   2   4  856.31   23.90
  -5  -2   4  237.48    8.40
   5  -2  -4  241.88    8.20
  -5  -2   4  247.08   10.30
  -5  -2   4  230.58    9.70
   5   2  -4  255.57   10.90
  -5   2   4  241.58   11.40
   5   2  -4  249.38    7.70
  -4  -2   4  250.97    9.80
   4   2  -4  262.97    9.40
  -4   2   4  250.87    8.10
   4   2  -4  249.18   13.10
  -3  -2   4 2276.37   56.19
   3  -2  -4 2079.79   56.69
   3   2  -4 2163.38   54.29
   3   2  -4 2181.68   56.89
  -3   2   4 2211.08   56.29
  -3   2   4 2268.17   54.59
  -2  -2   4 1108.59   29.30
   2   2  -4 1045.20   26.10
  -2   2   4 1108.79   28.90
   2   2  -4 1055.59   29.60
   2   2  -4 1101.99   26.30
   1  -2  -4  847.82   22.80
  -1  -2   4  875.71   23.30
   1   2  -4  843.02   23.50
  -1   2   4  832.82   22.40
   0  -2   4   89.39    2.90
   0  -2  -4   88.29    4.30
   0  -2   4   82.99    4.10
   0   2   4   82.09    3.50
   0   2   4   82.59    3.80
   0   2   4   79.99    4.00
   1  -2   4  819.62   21.90
   1  -2   4  790.52   22.10
  -1  -2  -4  824.12   22.90
   1   2   4  851.51   21.10
   1   2   4  830.62   22.10
   1   2   4  832.32   21.70
  -2  -2  -4 1072.69   30.80
   2  -2   4 1080.69   27.80
   2  -2   4 1052.59   29.90
   2   2   4 1092.49   28.30
   2   2   4 1096.89   27.40
   2   2   4 1098.69   28.70
  -3  -2  -4 2103.99   59.79
   3  -2   4 2215.38   58.69
   3  -2   4 2199.98   54.09
   3   2   4 2258.57   54.49
   3   2   4 2223.68   56.39
   3   2   4 2223.58   55.59
   4  -2   4  244.28   12.40
   4   2   4  249.28   11.60
   4   2   4  258.87    8.80
   4   2   4  256.57   10.40
  -5  -2  -4  256.57    8.80
   5  -2   4  237.38   14.00
   5   2   4  241.18   11.20
   5   2   4  254.47    9.00
   5   2   4  239.68    7.60
  -6  -2  -4  835.62   23.10
  -6   2  -4  829.72   23.10
   6   2   4  873.21   24.40
   6   2   4  854.11   22.00
  -7  -2  -4   25.80    4.20
   7   2   4   26.60    3.10
   7   2   4   25.40    4.10
   8  -2   4  731.73   20.40
  -8  -2  -4  720.63   21.20
   8   2   4  725.73   19.70
   8   2   4  766.32   23.20
   9  -2   4  235.18    9.00
  -9  -2  -4  230.68    9.70
   9   2   4  239.98    8.10
   9   2   4  237.18   11.20
   9   2   4  230.38    9.20
  10  -2   4  144.89    5.90
 -10  -2  -4  141.09    6.50
  10   2   4  151.98    7.10
  10   2   4  153.28    5.40
  11  -2   4  128.19    5.00
 -11  -2  -4  138.89    6.90
 -11  -2  -4  128.19    5.80
  11   2   4  131.79    4.70
  11   2   4  134.79    5.30
  12  -2   4   31.50    2.50
 -12  -2  -4   31.40    4.00
  12  -2   4   31.40    2.40
  12   2   4   30.80    2.40
  12   2   4   29.50    2.40
 -11  -3   4   34.00    3.50
  11  -3  -4   42.90    3.10
  11   3  -4   37.80    3.00
  10  -3  -4   85.79    6.50
 -10  -3   4   78.29    5.10
  10   3  -4   98.29    5.60
  -9  -3   4   48.40    6.40
   9  -3  -4   53.19    5.10
   9  -3  -4   50.59    5.70
   9   3  -4   49.70    4.90
   8  -3  -4  131.89    6.50
   8  -3  -4  118.19    8.40
  -8  -3   4  113.89    7.60
   8   3  -4  108.59    9.80
  -8   3   4  120.09    9.40
   8   3  -4  112.39    6.60
   8   3  -4  113.29    5.30
  -7  -3   4    4.70    3.20
  -7  -3   4    5.10    3.00
   7  -3  -4    8.10    4.30
   7  -3  -4    3.20    2.40
  -7   3   4    2.10    4.10
   7   3  -4    3.40    2.00
   7   3  -4    3.00    2.80
   7   3  -4    2.20    4.90
   6  -3  -4  488.45   14.30
  -6  -3   4  438.66   17.80
  -6  -3   4  492.05   15.70
  -6  -3   4  490.75   14.00
   6   3  -4  492.45   15.30
  -6   3   4  476.15   18.10
   6   3  -4  527.45   19.80
   6   3  -4  490.75   15.00
   6   3  -4  500.55   13.30
  -5  -3   4  201.68    7.20
  -5  -3   4  183.58    9.60
   5  -3  -4  202.78    7.20
  -5  -3   4  195.58    8.70
  -5   3   4  184.78    9.80
   5   3  -4  195.98    6.60
  -3  -3   4  611.04   18.50
   3  -3  -4  543.65   19.90
   3   3  -4  603.34   14.90
   3   3  -4  539.95   20.60
  -3   3   4  616.84   15.90
   3   3  -4  619.94   15.40
  -3   3   4  586.14   18.80
   2  -3  -4 1970.00   51.79
  -2  -3   4 2001.20   51.49
  -2   3   4 2052.19   49.50
   2   3  -4 1933.31   52.59
  -2   3   4 2037.80   51.49
   1  -3  -4 6270.27  156.28
  -1  -3   4 6480.45  156.38
  -1   3   4 6304.97  154.78
  -1   3   4 6607.84  155.78
   1   3  -4 6546.95  157.18
   0  -3   4  112.19    3.70
   0  -3   4  108.39    5.30
   0  -3  -4  118.39    5.80
   0   3   4  119.29    5.30
   0   3  -4  113.59    6.40
  -1  -3  -4 6654.63  159.78
   1  -3   4 6530.55  158.38
   1   3   4 6488.75  158.38
   2  -3   4 1989.90   49.60
  -2  -3  -4 1985.90   53.29
   2   3   4 2011.10   50.79
   2   3   4 1972.60   50.69
   2   3   4 1981.00   49.20
   3  -3   4  583.54   15.30
  -3  -3  -4  532.15   22.30
   3   3   4  570.04   18.80
   3   3   4  609.84   16.10
   3   3   4  570.74   17.80
   4  -3   4  375.56   16.90
  -4  -3  -4  365.06   11.60
   4   3   4  399.06   11.90
   4   3   4  387.36   13.90
   4   3   4  368.76   10.30
  -4   3  -4  352.66   14.00
  -5  -3  -4  215.58    7.90
   5  -3   4  194.58   14.60
   5   3   4  191.58   10.30
   5   3   4  208.68    7.90
  -5   3  -4  209.68   10.10
   5   3   4  208.68    6.60
  -6  -3  -4  508.05   15.10
   6   3   4  474.65   15.50
   6   3   4  512.25   15.90
   6   3   4  504.85   13.80
  -7  -3  -4    7.90    2.70
   7  -3   4    6.60    3.90
   7   3   4    5.70    1.80
   7   3   4    4.40    2.10
   7   3   4    8.00    3.20
  -8  -3  -4  125.49    7.00
   8  -3   4  115.89    6.90
   8   3   4  116.49    6.70
   8   3   4  127.09    7.60
   8   3   4  124.09    5.30
  -9  -3  -4   50.49    6.00
   9   3   4   55.99    5.20
   9   3   4   54.09    4.30
   9   3   4   56.29    7.70
 -10  -3  -4   90.29    5.20
  10   3   4   89.09    3.90
  10   3   4   91.99    5.60
  11  -3   4   35.00    3.00
 -11  -3  -4   34.80    4.30
 -11  -3  -4   40.40    3.60
  11   3   4   31.40    2.90
  11   3   4   37.60    2.60
  11  -4  -4   25.50    3.80
 -11  -4   4   23.90    3.60
  11   4  -4   26.20    2.50
  10  -4  -4  131.59    6.80
  10  -4  -4  137.29    5.60
 -10  -4   4  138.69    6.20
  10   4  -4  141.99    5.70
   9  -4  -4   36.00    5.00
  -9  -4   4   40.40    4.40
   9  -4  -4   53.19    4.00
   9   4  -4   41.00    4.60
   8  -4  -4  354.36   11.70
   8  -4  -4  341.37   13.10
  -8  -4   4  331.07   12.50
  -8   4   4  338.57   14.60
   8   4  -4  338.77   12.80
   8   4  -4  325.67   11.50
   7  -4  -4  406.46   14.20
   7  -4  -4  420.06   13.00
  -7  -4   4  427.76   14.20
  -7  -4   4  409.76   12.40
   7   4  -4  380.56   13.10
  -7   4   4  425.66   16.20
   7   4  -4  401.76   14.20
   6  -4  -4   91.49    5.30
  -6  -4   4   83.99    5.00
  -6  -4   4   73.09    6.40
   6   4  -4   85.89    6.00
   6   4  -4   76.79    6.20
  -6   4   4   88.19    8.50
   6   4  -4   83.69    8.10
  -5  -4   4  342.87   12.00
   5  -4  -4  335.77   10.60
  -5  -4   4  341.97   10.50
  -5  -4   4  325.07   14.40
  -5   4   4  329.07   13.50
   5   4  -4  335.97   12.00
  -4  -4   4  817.02   25.00
  -4  -4   4  827.42   21.60
  -4  -4   4  780.42   22.80
   4  -4  -4  822.12   21.50
  -4   4   4  831.62   24.10
   3  -4  -4 3392.06   82.89
  -3  -4   4 3376.56   83.29
  -3   4   4 3445.46   85.19
  -3   4   4 3507.15   89.29
  -2  -4   4 1770.52   47.10
  -2   4   4 1782.62   45.30
  -2   4   4 1802.82   47.40
   1  -4  -4  127.39    7.60
  -1  -4   4  129.39    6.60
   1   4  -4  135.39    9.90
  -1   4   4  135.69    6.60
   0  -4  -4  123.89    7.30
   0  -4   4  116.59    4.50
   0  -4   4  111.59    5.90
   0   4   4  127.29    7.00
   0   4   4  117.99    6.70
   0   4   4  128.99    6.00
   0   4  -4  108.09    8.20
  -1  -4  -4  137.39    8.50
   1  -4   4  134.09    6.00
   1   4   4  126.19    6.60
  -1   4  -4  124.69    7.80
   1   4   4  123.09    8.00
   1   4   4  130.99    5.60
   2  -4   4 1757.32   45.70
   2   4   4 1805.42   47.60
   2   4   4 1887.81   45.80
   3  -4   4 3593.74   84.49
  -3  -4  -4 3362.96   86.59
   3   4   4 3476.25   83.89
   3   4   4 3474.25   85.59
   3   4   4 3551.14   88.09
  -4  -4  -4  841.92   22.90
   4   4   4  873.21   26.20
  -4   4  -4  853.31   24.90
   4   4   4  865.21   23.40
   4   4   4  852.01   21.70
  -5  -4  -4  350.06   11.40
   5  -4   4  296.37   20.00
   5   4   4  357.66   11.50
   5   4   4  354.06   15.90
  -5   4  -4  357.86   13.40
   5   4   4  334.57    9.80
  -6  -4  -4   92.69    5.70
   6   4   4   87.59    4.10
  -6   4  -4   94.49    8.10
   6   4   4   82.09    6.40
   6   4   4   82.29    5.10
   7  -4   4  410.26   13.60
  -7  -4  -4  406.16   13.50
   7   4   4  427.16   11.90
   7   4   4  393.76   13.20
   7   4   4  418.96   14.30
  -8  -4  -4  346.37   12.20
   8  -4   4  329.27   11.70
   8   4   4  336.87   13.00
   8   4   4  349.47   10.30
   8   4   4  335.67   11.60
   9  -4   4   39.20    4.30
  -9  -4  -4   46.10    4.30
   9   4   4   45.20    3.00
   9   4   4   47.50    8.90
   9   4   4   37.70    4.60
  10  -4   4  136.79    5.70
 -10  -4  -4  146.49    6.30
  10   4   4  136.19    5.70
  10   4   4  142.49    5.00
 -11  -4  -4   34.70    3.70
  11  -4   4   28.10    2.90
  11   4   4   31.80    2.80
  11   4   4   32.20    2.80
 -11  -5   4  187.68    6.60
  11  -5  -4  187.58    6.20
  11   5  -4  190.08    6.10
 -10  -5   4  134.39    5.80
  10  -5  -4  127.29    5.40
  10  -5  -4  124.79    6.40
  10   5  -4  126.09    5.20
  -9  -5   4  510.35   15.70
   9  -5  -4  513.75   15.20
   9  -5  -4  533.15   16.60
   9   5  -4  520.15   15.40
  -9   5   4  510.35   17.40
   8  -5  -4  847.92   23.60
   8  -5  -4  833.12   24.30
  -8  -5   4  856.71   24.40
   8   5  -4  826.52   23.20
  -8   5   4  852.61   26.90
   7  -5  -4  116.59    6.50
  -7  -5   4  121.09    5.90
  -7  -5   4  105.79    7.30
   7   5  -4  112.09    8.00
  -7   5   4  108.49    9.60
   7   5  -4  111.69    6.50
  -6  -5   4  236.48    9.90
  -6  -5   4  244.48    8.30
   6  -5  -4  234.98    8.90
  -6   5   4  223.58   12.10
   6   5  -4  229.58   10.10
   5  -5  -4  349.67   11.10
  -5  -5   4  363.36   12.50
  -5  -5   4  348.87   10.90
   5   5  -4  344.17   12.50
   5   5  -4  332.97   11.90
  -5   5   4  373.66   14.50
   5   5  -4  339.57   11.60
  -4  -5   4  240.68   10.30
   4  -5  -4  247.68    8.30
  -4   5   4  255.57   11.50
   4   5  -4  239.48   10.10
  -3  -5   4  105.79    8.40
  -3  -5   4  121.99    8.50
  -3  -5   4  107.69    5.40
   3  -5  -4  117.39    5.00
  -3   5   4  119.49    8.10
  -3   5   4  116.79    7.90
  -2  -5   4  386.96   14.10
   2  -5  -4  384.16   10.90
  -2  -5   4  363.56   11.60
  -2   5   4  385.66   14.50
  -2   5   4  396.06   15.30
  -2   5   4  389.76   13.70
  -1  -5   4  615.94   16.90
   1  -5  -4  600.14   15.50
  -1  -5   4  628.34   19.00
  -1   5   4  529.95   20.60
  -1   5   4  554.94   20.00
   0  -5   4  244.98    9.90
   0  -5   4  240.08    8.70
   0  -5  -4  235.78    7.40
   0   5   4  233.18    9.10
   0   5   4  249.28   10.00
   1  -5   4  620.34   18.20
  -1  -5  -4  585.94   15.80
   1  -5   4  617.44   18.20
   1   5   4  606.04   20.40
  -1   5  -4  600.14   21.40
   1   5   4  611.84   18.10
   1   5   4  589.84   16.90
   2  -5   4  380.06   15.80
   2  -5   4  391.76   12.20
  -2  -5  -4  384.06   10.80
   2   5   4  393.96   10.80
   2   5   4  392.06   13.10
   2   5   4  375.96   11.50
   2   5   4  387.56   14.50
  -3  -5  -4  113.69    4.90
  -3  -5  -4  115.79    6.70
  -3   5  -4  116.19   11.10
   3   5   4  118.79    7.70
   3   5   4  124.09    5.60
   3   5   4  110.79    4.40
  -4  -5  -4  255.97    9.20
   4   5   4  241.38    9.00
   4   5   4  240.98   12.10
   4   5   4  249.78    7.50
  -4   5  -4  256.07   12.00
  -5  -5  -4  318.17   13.20
  -5  -5  -4  358.06   11.60
   5   5   4  356.86   10.10
   5   5   4  355.36   12.00
   5   5   4  352.06   12.10
  -5   5  -4  362.26   14.20
  -6  -5  -4  233.68    9.30
  -6   5  -4  221.08   11.40
   6   5   4  236.28    7.60
   6   5   4  249.48    9.80
   6   5   4  239.98    9.30
  -7  -5  -4  111.59    6.90
   7  -5   4  116.39    7.70
   7   5   4  124.89    7.70
   7   5   4  114.79    6.60
   7   5   4  113.99    5.00
  -8  -5  -4  854.91   23.50
   8  -5   4  749.03   23.30
   8   5   4  854.31   21.50
   8   5   4  833.32   22.70
   8   5   4  797.72   25.00
  -9  -5  -4  520.95   15.60
   9  -5   4  516.75   15.00
   9   5   4  519.95   14.00
   9   5   4  521.05   15.40
 -10  -5  -4  124.49    5.60
  10  -5   4  129.49    5.40
  10   5   4  123.89    4.60
  10   5   4  118.79    5.10
  11  -5   4  180.48    6.00
 -11  -5  -4  188.48    6.50
  11   5   4  184.28    6.00
  10  -6  -4  251.47    8.10
  10  -6  -4  259.47    8.80
 -10  -6   4  262.67   10.40
  10   6  -4  254.27    8.00
   9  -6  -4  175.58    7.70
  -9  -6   4  180.18    7.40
   9  -6  -4  197.58    7.10
   9   6  -4  183.88    6.80
  -9   6   4  192.98    9.00
  -8  -6   4   94.89    5.50
   8  -6  -4   89.89    5.10
   8  -6  -4   93.89    7.10
   8   6  -4   96.89    5.80
  -8   6   4   90.49    7.60
  -7  -6   4  191.78    7.70
  -7  -6   4  202.88    9.30
   7   6  -4  208.68    8.50
   7   6  -4  199.68    9.10
  -7   6   4  221.68   12.50
  -6  -6   4  775.72   21.00
  -6  -6   4  757.52   22.40
   6  -6  -4  775.72   21.80
  -6   6   4  812.52   25.90
   6   6  -4  778.42   21.80
   6   6  -4  766.32   21.80
  -5  -6   4  967.60   27.00
   5  -6  -4  980.10   26.10
  -5  -6   4  948.91   25.60
   5   6  -4 1024.00   26.80
   5   6  -4  930.11   26.20
   5   6  -4  985.20   26.40
  -5   6   4 1004.70   29.90
  -4  -6   4   93.29    9.60
   4  -6  -4  105.29    5.20
  -4  -6   4   98.59    5.20
   4   6  -4  103.09    6.90
   4   6  -4   96.69    7.00
  -4   6   4  101.49    8.70
  -4   6   4  101.59   10.80
   4   6  -4  106.19    6.50
   3  -6  -4  859.81   24.10
  -3   6   4  848.32   27.50
   3   6  -4  895.11   24.40
  -3   6   4  891.01   26.70
  -3   6   4  874.11   28.90
   3   6  -4  883.71   23.90
   3   6  -4  888.11   24.00
  -2  -6   4  421.46   12.20
   2  -6  -4  433.56   11.90
  -2  -6   4  425.06   16.50
  -2   6   4  396.16   16.10
  -2   6   4  387.76   14.70
   1  -6  -4  477.25   12.70
  -1  -6   4  452.85   16.60
  -1  -6   4  468.75   13.40
  -1   6   4  450.15   16.70
  -1   6   4  444.16   15.20
   0  -6   4  798.12   24.40
   0  -6  -4  827.92   21.00
   0  -6   4  797.72   21.70
   0   6   4  852.51   24.90
   0   6   4  796.22   23.00
  -1  -6  -4  478.55   12.80
   1  -6   4  455.45   15.80
   1   6   4  476.95   15.70
   1   6   4  488.75   14.50
   1   6   4  427.86   18.60
  -2  -6  -4  418.56   11.50
   2   6   4  414.76   13.80
   2   6   4  404.86   12.60
   2   6   4  403.96   11.70
   2   6   4  396.66   17.10
  -3  -6  -4  912.91   23.40
  -3  -6  -4  908.91   24.70
   3   6   4  931.21   24.30
  -3   6  -4  911.81   27.50
   3   6   4  867.51   24.90
   3   6   4  955.00   26.10
   3   6   4  888.41   23.30
  -3   6  -4  932.01   27.10
  -4  -6  -4  106.89    6.90
  -4  -6  -4  109.39    5.30
   4   6   4   96.99    4.60
   4   6   4  100.99    5.60
  -4   6  -4   96.39    9.80
   4   6   4  104.29    6.00
   4   6   4   89.79    6.40
  -4   6  -4   98.19   15.50
  -5  -6  -4  994.40   26.50
  -5  -6  -4  948.41   26.70
  -5   6  -4  958.10   28.60
   5   6   4  994.30   26.40
   5   6   4  977.40   27.80
  -6  -6  -4  794.82   21.90
   6   6   4  771.12   21.60
   6   6   4  719.43   23.60
   6   6   4  789.72   20.10
  -6   6  -4  772.72   24.10
   7  -6   4  202.08    9.50
  -7  -6  -4  212.28    8.80
   7   6   4  193.18   10.50
   7   6   4  200.78    8.40
  -8  -6  -4   94.49    5.40
   8  -6   4   94.79    5.60
   8   6   4  103.19    5.90
  -9  -6  -4  183.18    7.10
   9  -6   4  188.08    7.00
   9   6   4  184.18    6.80
   9   6   4  184.68    6.90
   9   6   4  172.78    6.20
 -10  -6  -4  253.57    8.60
  10  -6   4  256.67    8.10
  10   6   4  259.27    8.00
  10  -7  -4  117.99    5.60
 -10  -7   4  117.99    5.40
  10  -7  -4  123.49    4.80
  10   7  -4  126.09    4.50
  -9  -7   4   39.90    3.90
   9  -7  -4   37.30    3.50
   9  -7  -4   40.60    4.30
   9   7  -4   40.50    3.00
   8  -7  -4  159.48    6.60
  -8  -7   4  161.78    6.90
  -8   7   4  158.48    8.90
   8   7  -4  167.78    7.80
  -7  -7   4  255.27    8.30
   7  -7  -4  260.67    9.30
  -7  -7   4  270.57    9.80
   7   7  -4  278.97    9.80
  -7   7   4  272.47   11.90
   7   7  -4  258.87   10.10
  -6  -7   4  108.29    7.60
  -6  -7   4  111.09    5.70
   6  -7  -4  117.49    6.50
   6   7  -4  116.09    6.50
  -6   7   4  103.09   10.10
   6   7  -4  120.49    7.00
  -5  -7   4   79.09    7.40
   5  -7  -4   83.59    5.50
  -5  -7   4   85.29    5.00
   5   7  -4   81.89    5.90
  -5   7   4   82.29    9.50
   5   7  -4   78.09    6.30
  -4  -7   4  558.44   16.20
   4  -7  -4  569.04   16.40
  -4   7   4  589.04   20.00
   4   7  -4  564.84   17.10
   4   7  -4  602.94   17.30
  -4   7   4  563.54   20.50
   4   7  -4  577.54   17.00
  -3  -7   4  249.68    8.50
   3  -7  -4  264.37    8.50
   3  -7  -4  234.78   14.10
   3   7  -4  249.08   10.00
   3   7  -4  256.77    9.70
  -3   7   4  220.38   13.60
  -3   7   4  239.58   12.10
   3   7  -4  250.97    9.50
  -3   7   4  245.78   12.30
   2  -7  -4 1418.56   35.10
  -2  -7   4 1393.26   35.30
   2  -7  -4 1345.07   36.80
  -2   7   4 1402.86   38.50
   2   7  -4 1403.26   35.90
   2   7  -4 1412.46   36.30
  -2   7   4 1351.56   41.70
   2   7  -4 1374.96   36.30
  -2   7   4 1392.26   38.10
   1  -7  -4  140.49    5.50
   1  -7  -4  136.09    8.60
  -1  -7   4  140.29    6.10
   1   7  -4  138.99    7.20
   1   7  -4  148.59    9.60
   1   7  -4  137.89    8.10
  -1   7   4  143.99    9.00
  -1   7   4  152.08    9.80
  -1   7   4  141.69    9.70
   0  -7  -4  139.39    5.50
   0  -7   4  139.19    6.20
   0  -7  -4  131.29    8.00
   0   7   4  146.19    8.40
   0   7   4  135.09    9.20
   0   7   4  141.29    8.80
   0   7  -4  137.49    8.70
  -1  -7  -4  143.49    7.90
  -1  -7  -4  139.59    5.50
   1  -7   4  137.99    6.80
  -1   7  -4  135.49    9.10
   1   7   4  138.89    8.40
   1   7   4  150.68    8.10
   1   7   4  147.99    8.60
   2  -7   4 1381.66   35.40
  -2  -7  -4 1416.86   35.10
  -2   7  -4 1386.56   38.00
   2   7   4 1401.96   36.60
   2   7   4 1369.46   36.60
   2   7   4 1437.96   39.30
  -3  -7  -4  243.98   10.00
  -3  -7  -4  250.47    8.00
   3   7   4  251.77    9.80
  -3   7  -4  249.08   12.20
   3   7   4  239.98    9.50
   3   7   4  253.27   10.90
  -4  -7  -4  536.65   15.70
  -4  -7  -4  570.44   17.40
  -4  -7  -4  584.74   17.70
  -4   7  -4  599.94   19.80
   4   7   4  574.24   17.10
   4   7   4  583.24   19.10
   4   7   4  579.24   17.10
   5  -7   4   84.89    6.80
  -5  -7  -4   88.59    6.60
  -5  -7  -4   83.19    6.60
   5   7   4   74.99    5.90
  -5   7  -4  101.29    9.90
   5   7   4   89.89    6.30
   6  -7   4  111.49    7.60
  -6  -7  -4  109.49    7.80
  -6  -7  -4  106.09    6.90
   6   7   4   88.19   10.60
   6   7   4  105.19    6.20
   6   7   4  110.39    7.00
  -7  -7  -4  259.07    9.30
   7  -7   4  260.47    9.50
   7   7   4  277.77    9.70
   7   7   4  265.17    9.30
  -8  -7  -4  154.88    6.80
   8  -7   4  170.38    6.90
  -9  -7  -4   32.10    3.80
   9  -7   4   46.80    6.10
   9   7   4   42.70    3.10
 -10  -7  -4  128.29    5.30
  10  -7   4  130.89    5.30
  10   7   4  130.29    4.70
   9  -8  -4    9.60    1.90
   9  -8  -4    8.70    2.30
  -9  -8   4    3.70    5.30
   9   8  -4   12.30    1.60
   8  -8  -4  148.19    5.90
   8  -8  -4  142.59    6.30
  -8  -8   4  145.19    7.00
  -8   8   4  150.88    7.80
   8   8  -4  146.49    5.70
  -7  -8   4   96.69    6.50
   7  -8  -4  107.89    5.20
   7   8  -4  105.59    5.90
  -7   8   4  108.29    7.60
  -6  -8   4   48.00    3.30
   6  -8  -4   45.10    4.00
   6   8  -4   38.60    4.10
   6   8  -4   44.70    4.70
  -6   8   4   36.90    5.20
  -5  -8   4  201.98    7.60
   5  -8  -4  200.18    8.20
   5   8  -4  194.18    8.50
   5   8  -4  204.38    8.50
  -5   8   4  216.08   12.80
   4  -8  -4   51.09    4.50
  -4  -8   4   52.59    4.20
   4   8  -4   44.90    5.60
  -4   8   4   48.50    6.20
  -4   8   4   45.80    6.80
   4   8  -4   47.60    5.20
   3  -8  -4  158.88   11.80
   3  -8  -4  175.88    7.00
  -3  -8   4  170.78    6.90
   3   8  -4  174.68    8.30
   3   8  -4  181.68    8.10
   3   8  -4  166.98    7.70
  -3   8   4  165.28   10.20
  -3   8   4  163.88   11.10
   2  -8  -4  238.48   11.20
  -2  -8   4  235.18    8.20
  -2   8   4  203.98   14.30
   2   8  -4  230.48    9.60
   2   8  -4  229.28    9.70
  -2   8   4  239.88   12.10
   1  -8  -4  121.89    8.10
  -1  -8   4  125.89    5.60
   1  -8  -4  115.89    5.30
  -1   8   4  114.09    9.20
  -1   8   4  113.79    8.90
  -1   8   4  117.19   10.40
   1   8  -4  119.39    8.00
   0  -8  -4 1178.98   29.50
   0  -8   4 1122.89   29.60
   0  -8  -4 1143.09   31.00
   0   8   4 1164.78   31.80
   0   8   4 1112.39   35.80
   0   8   4 1168.58   32.70
   0   8  -4 1161.58   31.80
   1  -8   4  115.49    5.70
  -1  -8  -4  114.99    7.20
  -1  -8  -4  120.59    5.20
   1   8   4  111.89    8.50
   1   8   4  108.99    9.60
   1   8   4  124.69    8.10
  -1   8  -4  120.19    8.80
  -2  -8  -4  228.68    9.60
  -2  -8  -4  218.68    7.60
   2  -8   4  226.38    8.10
   2   8   4  232.68   10.50
   2   8   4  215.88   12.30
  -3  -8  -4  163.88    8.20
   3  -8   4  162.78    6.90
  -3  -8  -4  165.08    6.50
   3   8   4  152.78   11.20
   3   8   4  178.78    9.20
   3   8   4  155.18    7.90
  -3   8  -4  160.68   10.60
   4  -8   4   57.89    5.30
  -4  -8  -4   40.00    5.50
   4   8   4   50.59    6.90
  -4   8  -4   51.59    6.60
   4   8   4   41.50    6.60
   4   8   4   47.90    5.50
  -5  -8  -4  192.58    8.70
   5  -8   4  198.48    8.60
   5   8   4  194.98    9.80
   5   8   4  198.38    8.40
  -6  -8  -4   41.70    5.00
  -6  -8  -4   50.69    5.30
   6  -8   4   40.10    4.80
   6   8   4   44.60    4.80
   7  -8   4   93.29    5.60
  -7  -8  -4  104.29    5.70
   8  -8   4  150.28    6.30
   8   8   4  140.59    5.70
   9  -8   4    2.40    2.50
  -9  -8  -4    1.20    3.20
   8  -9  -4  189.38    6.70
   8  -9  -4  199.38    6.60
   8   9  -4  192.38    6.40
  -8   9   4  185.68    8.10
   7  -9  -4    6.50    1.90
  -7   9   4    5.60    3.60
   7   9  -4    7.10    1.80
  -6  -9   4  210.88    6.80
   6  -9  -4  216.88    7.60
   6   9  -4  215.78    7.80
  -6   9   4  205.98    9.90
  -5  -9   4  373.66   10.70
   5  -9  -4  348.37   11.20
  -5   9   4  356.06   14.10
   5   9  -4  374.66   12.40
   4  -9  -4  181.38    6.80
  -4  -9   4  162.38    6.30
  -4   9   4  175.78    9.80
   4   9  -4  170.28    8.10
   3  -9  -4  593.94   20.00
  -3  -9   4  614.34   17.20
   3  -9  -4  628.64   17.60
  -3   9   4  634.94   21.90
   3   9  -4  593.34   18.50
  -3   9   4  624.14   20.40
   2  -9  -4  110.09    5.60
   2  -9  -4  113.69    8.60
  -2  -9   4   99.19    5.50
  -2   9   4  113.19   10.30
   2   9  -4  115.19    7.30
  -2   9   4  103.79    8.70
   1  -9  -4 2011.70   49.50
  -1  -9   4 2021.00   49.40
   1  -9  -4 1969.90   50.79
   1   9  -4 1972.70   51.19
  -1   9   4 1992.80   52.99
  -1   9   4 1976.80   51.79
  -1   9   4 1888.41   57.89
   0  -9  -4  948.01   25.10
   0  -9   4  945.31   25.10
   0  -9  -4  963.40   26.70
   0   9   4  907.81   32.80
   0   9   4  991.30   27.50
   0   9  -4  940.11   27.40
   0   9   4  980.70   28.90
  -1  -9  -4 1958.90   49.10
  -1  -9  -4 1985.00   50.59
   1  -9   4 2037.30   49.10
   1   9   4 1878.51   56.69
  -1   9  -4 1978.10   51.89
   1   9   4 2024.70   52.39
   1   9   4 1947.91   50.99
  -2  -9  -4  113.79    7.10
  -2  -9  -4  118.59    5.50
   2  -9   4  107.89    5.50
   2   9   4  105.69   14.20
  -2   9  -4  105.29    8.90
   2   9   4  113.79    7.40
   2   9   4  108.19    9.50
  -3  -9  -4  624.74   17.20
   3  -9   4  623.24   17.30
  -3  -9  -4  623.94   18.70
  -3   9  -4  654.83   20.90
   3   9   4  637.84   18.80
   3   9   4  581.94   21.00
   4  -9   4  159.48    6.40
  -4  -9  -4  160.18    8.20
  -4   9  -4  167.88   10.40
   4   9   4  171.18    7.90
  -5  -9  -4  376.86   12.70
   5  -9   4  367.76   11.20
   5   9   4  371.26   12.50
  -6  -9  -4  205.18    7.70
   6  -9   4  191.88    7.40
   6   9   4  210.88    7.60
  -7  -9  -4    3.80    3.60
   7  -9   4   12.10    3.00
   7   9   4    5.60    1.80
   8  -9   4  177.08    6.70
   8   9   4  193.88    6.40
   7 -10  -4   23.60    2.80
   7 -10  -4   17.90    2.10
  -7 -10   4   16.50    2.30
   7  10  -4   18.50    2.60
  -7  10   4   24.30    3.60
   6 -10  -4  113.09    4.90
   6  10  -4  115.29    5.00
   5 -10  -4   87.99    4.50
  -5 -10   4   94.79    3.90
  -5  10   4   90.09    7.10
   5  10  -4   79.29    4.70
   4 -10  -4  316.67   10.20
  -4 -10   4  329.97    9.70
   4  10  -4  330.27   12.30
  -4  10   4  344.77   13.20
   3 -10  -4   91.79    4.60
   3 -10  -4  113.69    8.40
  -3 -10   4  103.29    4.40
  -3  10   4   84.49    8.10
  -3  10   4  102.49    8.30
   3  10  -4  110.19    6.90
   2 -10  -4  379.66   13.80
   2 -10  -4  406.36   11.90
  -2 -10   4  398.56   11.60
  -2  10   4  397.86   14.90
   2  10  -4  395.26   13.80
  -2  10   4  392.56   14.70
   1 -10  -4  114.29    7.90
   1 -10  -4  114.19    5.10
  -1 -10   4  124.89    5.00
  -1  10   4  125.29    8.40
  -1  10   4  111.69    8.70
   1  10  -4  133.89    8.00
   0 -10   4  170.58    6.10
   0 -10  -4  161.18    6.20
   0 -10  -4  171.88    8.50
   0  10   4  160.78    8.90
   0  10   4  176.18    9.70
   0  10  -4  159.58    9.00
  -1 -10  -4  126.99    5.20
   1 -10   4  117.69    5.00
  -1 -10  -4  127.79    7.30
   1  10   4  128.19    7.90
   1  10   4  116.29    9.20
  -1  10  -4  142.89    8.70
   2 -10   4  381.06   13.60
  -2 -10  -4  397.96   13.30
   2 -10   4  390.96   11.30
  -2 -10  -4  379.36   11.20
   2  10   4  389.26   13.50
  -2  10  -4  409.16   14.80
   3 -10   4  101.69    4.60
  -3 -10  -4  103.59    6.60
  -3  10  -4  100.89    8.50
   3  10   4  107.39    6.90
   4 -10   4  320.17    9.70
  -4 -10  -4  294.87   12.90
   4  10   4  329.07   10.70
   5 -10   4   91.09    4.70
  -5 -10  -4   89.59    4.90
   5  10   4   87.39    4.90
  -6 -10  -4  128.19    5.50
   6 -10   4  116.59    5.50
   6  10   4  122.59    5.30
   7 -10   4   20.20    2.70
   7  10   4   20.30    2.90
  -5 -11   4  314.57    9.20
  -5 -11   4  294.07    8.70
   5 -11  -4  309.17    9.10
  -5  11   4  291.97   11.30
   5  11  -4  315.07    9.50
   4 -11  -4   42.10    3.40
   4  11  -4   54.29    3.80
  -4  11   4   40.40    5.20
   3 -11  -4  166.28    6.00
  -3 -11   4  174.08    5.70
   3  11  -4  165.78    6.80
   2 -11  -4   59.79    3.60
   2 -11  -4   56.99    5.60
  -2 -11   4   63.49    3.20
  -2  11   4   51.19    5.10
  -2  11   4   52.69    8.30
   2  11  -4   61.99    4.70
  -1 -11   4  148.29    5.50
   1 -11  -4  148.69    5.70
   1 -11  -4  151.28    6.90
  -1  11   4  174.28   10.30
   1  11  -4  159.08    7.10
  -1  11   4  158.18    7.30
   0 -11  -4    6.40    2.60
   0 -11   4    7.60    1.50
   0 -11  -4    9.60    1.90
   0  11  -4    7.30    2.80
   0  11   4    7.10    2.90
   0  11   4    8.70    7.00
   1 -11   4  149.59    5.30
   1 -11   4  147.09    6.20
  -1 -11  -4  145.09    6.40
  -1 -11  -4  134.59    5.50
   1  11   4  150.38    6.90
  -1  11  -4  142.39    7.30
  -2 -11  -4   63.09    4.30
   2 -11   4   56.39    3.30
  -2 -11  -4   50.49    4.80
   2  11   4   60.89    4.70
  -2  11  -4   56.79    5.20
  -3 -11  -4  166.38    6.60
   3 -11   4  164.78    5.90
   3  11   4  166.28    6.90
   4 -11   4   47.90    4.20
  -4 -11  -4   48.70    3.70
   4  11   4   51.79    4.00
  -5 -11  -4  307.97    9.40
   5 -11   4  299.97    9.00
   5  11   4  294.87    9.30
   3 -12  -4   19.30    2.30
  -3 -12   4   26.70    2.70
  -3 -12   4   23.60    2.80
   3  12  -4   23.30    3.20
  -2 -12   4   37.80    2.70
  -2 -12   4   36.60    3.10
   2 -12  -4   36.20    3.60
   2  12  -4   34.80    3.40
  -1 -12   4    7.70    1.50
   1 -12  -4    7.60    2.80
   1 -12  -4    9.80    2.30
  -1 -12   4    7.50    1.90
   1  12  -4    8.40    2.30
  -1  12   4    8.00    2.40
   0 -12   4  488.25   13.10
   0 -12  -4  501.15   14.10
   0 -12  -4  470.05   13.20
   0 -12   4  490.55   13.50
   0  12   4  499.35   14.40
   0  12  -4  484.05   14.30
   1 -12   4    8.90    1.50
   1 -12   4    0.90    3.00
  -1 -12  -4    8.90    2.20
   1  12   4    5.10    2.30
  -1  12  -4   14.90    2.60
   2 -12   4   31.90    2.80
  -2 -12  -4   33.90    3.40
   2  12   4   34.30    3.60
   3 -12   4   26.40    2.80
  -3 -12  -4   22.40    3.30
  12   0  -5    8.80    1.50
  11   0  -5  166.58    6.20
 -11   0   5  159.88    6.90
  11   0  -5  170.68    6.30
 -10   0   5   -0.50    2.70
  10   0  -5    1.70    1.90
  10   0  -5    3.70    4.80
   9   0  -5   33.20    5.20
  -9   0   5   39.50    6.00
   9   0  -5   31.80    3.90
   8   0  -5  193.88    7.30
   8   0  -5  197.78   10.30
  -8   0   5  187.28    9.40
   7   0  -5    0.70    2.00
   7   0  -5    8.40    4.80
  -7   0   5    3.20    3.00
  -6   0   5    7.80    5.40
  -6   0   5   13.10    3.70
   5   0  -5  621.84   16.60
  -5   0   5  574.44   17.00
  -5   0   5  656.33   18.70
  -5   0   5  612.04   18.40
  -4   0   5  150.18    7.00
  -3   0   5 3224.08   79.99
  -2   0   5   14.10    2.70
  -2   0   5   13.30    2.40
   2   0  -5   17.50    2.30
  -1   0   5   29.50    2.20
   1   0  -5   30.50    2.00
   0   0  -5    0.80    0.80
   0   0   5    0.40    0.50
   0   0   5    0.20    0.60
   1   0   5   31.70    1.90
  -1   0  -5   28.40    3.20
   1   0   5   30.30    2.10
   2   0   5   19.10    2.30
   3   0   5 3311.37   81.89
   3   0   5 3417.46   84.79
   4   0   5  144.19    8.10
   4   0   5  127.49    6.50
  -5   0  -5  628.24   17.50
   5   0   5  639.64   22.50
   5   0   5  610.74   19.50
   6   0   5    1.90    2.90
  -6   0  -5    1.70    2.40
   6   0   5    0.90    8.40
   7   0   5    1.90    2.40
  -7   0  -5    2.50    2.70
   8   0   5  194.08    7.30
  -8   0  -5  187.58    8.30
   9   0   5   40.20    7.30
  -9   0  -5   26.80    6.00
   9   0   5   37.40    4.10
  -9   0  -5   44.30    5.70
 -10   0  -5   -1.10    2.60
  10   0   5    0.20    1.60
 -11   0  -5  167.98    7.10
  11   0   5  169.38    5.70
  11   0   5  158.98    6.10
  12   0   5    5.40    1.30
  12   0   5    6.40    1.70
 -12  -1   5   29.30    4.80
  12  -1  -5   20.70    2.20
  12   1  -5   21.40    2.30
 -11  -1   5   66.99    4.50
  11  -1  -5   68.69    3.80
  11   1  -5   71.59    3.80
  10  -1  -5  377.06   13.60
  10  -1  -5  364.96   10.90
 -10  -1   5  381.16   12.40
 -10   1   5  370.16   12.10
  10   1  -5  363.66   10.50
   9  -1  -5  703.53   19.50
   9  -1  -5  702.03   21.10
  -9  -1   5  689.23   21.20
  -9   1   5  721.13   21.40
   9   1  -5  719.03   20.90
   9   1  -5  709.93   19.10
   8  -1  -5  612.44   17.30
  -8  -1   5  602.94   19.00
  -8   1   5  622.04   19.00
   8   1  -5  616.74   16.70
   8   1  -5  586.44   19.80
   7  -1  -5   52.39    4.30
   7  -1  -5   69.79    7.50
  -7  -1   5   55.89    6.10
   7   1  -5   54.19    4.10
  -7   1   5   56.89    8.30
   7   1  -5   54.69    6.20
  -7   1   5   63.89    6.90
  -6  -1   5  480.15   15.40
  -6  -1   5  485.95   14.00
   6  -1  -5  479.15   13.80
  -6   1   5  472.75   15.50
   6   1  -5  473.15   20.60
   6   1  -5  473.55   13.30
  -6   1   5  484.45   16.90
  -5  -1   5 1454.55   38.70
  -5  -1   5 1599.44   41.40
  -5  -1   5 1544.85   40.20
   5  -1  -5 1522.25   38.60
   5   1  -5 1566.84   38.30
  -5   1   5 1563.54   41.20
   5   1  -5 1561.44   43.90
  -5   1   5 1533.45   40.20
  -4  -1   5 1323.67   35.50
  -4   1   5 1310.07   34.50
   4   1  -5 1304.57   36.30
  -3  -1   5 1695.73   43.20
   3  -1  -5 1627.34   43.20
  -3   1   5 1610.04   42.70
  -3   1   5 1659.73   42.30
  -2  -1   5 1110.99   30.40
   2  -1  -5 1180.78   29.90
  -2   1   5 1079.09   29.60
   2   1  -5 1175.78   28.20
   1  -1  -5 4124.99   98.99
  -1  -1   5 4201.68   99.99
  -1  -1   5 4072.79   97.39
  -1   1   5 3920.51   98.49
   0  -1   5 1589.34   38.40
   0  -1  -5 1557.04   39.80
   0  -1   5 1577.04   38.00
   0  -1   5 1643.14   40.50
   0   1   5 1569.64   39.70
   0   1  -5 1525.55   39.10
   0   1   5 1592.94   38.80
  -1  -1  -5 4097.89  101.09
   1  -1   5 4157.58   99.69
   1   1   5 4081.19   99.89
   1   1   5 4118.79   98.79
   2  -1   5 1108.99   30.30
  -2  -1  -5 1137.89   32.10
   2   1   5 1144.19   28.50
   2   1   5 1118.69   29.80
   2   1   5 1122.79   29.00
  -3  -1  -5 1535.25   46.40
   3  -1   5 1649.04   44.40
   3   1   5 1677.23   43.50
   3   1   5 1712.43   41.90
   3   1   5 1655.13   41.40
   4  -1   5 1259.97   33.50
   4  -1   5 1302.87   37.50
   4   1   5 1307.67   36.20
   4   1   5 1236.38   33.90
  -5  -1  -5 1578.94   39.40
   5  -1   5 1644.74   46.50
   5   1   5 1491.85   38.50
  -5   1  -5 1506.45   39.30
   5   1   5 1540.75   42.80
  -6  -1  -5  490.95   14.60
   6   1   5  490.65   13.60
  -6   1  -5  475.75   14.50
  -7  -1  -5   55.39    5.20
   7  -1   5   67.59    9.40
  -7   1  -5   59.69   12.70
  -7   1  -5   63.49    5.70
   7   1   5   54.99    4.10
   7   1   5   57.49    5.30
   8  -1   5  600.14   17.30
  -8  -1  -5  630.74   18.40
   8   1   5  603.64   16.90
   8   1   5  610.34   20.40
  -8   1  -5  624.34   18.20
   9  -1   5  763.52   20.40
  -9  -1  -5  746.03   21.40
   9   1   5  743.43   24.00
   9   1   5  728.63   20.00
  -9   1  -5  712.83   21.20
 -10  -1  -5  372.76   12.00
 -10  -1  -5  376.36   14.00
  10  -1   5  366.76   11.10
  10   1   5  379.66   11.00
  10   1   5  387.46   12.30
 -11  -1  -5   69.19    4.60
  11  -1   5   72.89    3.50
  11   1   5   70.09    4.00
  11   1   5   72.79    3.40
  12  -1   5   27.30    2.30
  12   1   5   26.60    2.20
 -12  -2   5   81.79    4.50
  12   2  -5   80.69    4.50
 -11  -2   5   41.20    3.80
  11  -2  -5   42.40    3.20
  11   2  -5   36.80    3.00
 -10  -2   5  212.78    8.50
  10  -2  -5  214.68    7.30
  10   2  -5  215.48    8.30
   9  -2  -5  185.28    7.70
   9  -2  -5  185.88    9.50
  -9  -2   5  178.98    8.90
   9   2  -5  183.58    9.50
   9   2  -5  176.88    6.90
   9   2  -5  179.38    7.90
   8  -2  -5  466.55   16.10
   8  -2  -5  515.55   14.80
  -8  -2   5  506.15   16.30
  -8   2   5  469.35   16.20
   8   2  -5  474.85   16.10
   8   2  -5  479.35   13.60
  -8   2   5  493.15   17.70
   7  -2  -5  548.25   15.60
   7  -2  -5  522.45   17.00
  -7  -2   5  540.75   17.10
   7   2  -5  536.65   17.40
   7   2  -5  541.15   14.70
  -7   2   5  532.75   18.50
  -7   2   5  519.35   17.40
  -6  -2   5   65.39    4.80
   6  -2  -5   60.09    7.90
  -6  -2   5   52.29    9.00
   6  -2  -5   58.49    4.70
   6   2  -5   56.59    3.90
  -6   2   5   64.09    7.90
  -6   2   5   64.69    7.60
  -5  -2   5  186.78    7.20
  -5  -2   5  190.48    9.60
  -5  -2   5  187.88    8.70
   5  -2  -5  198.18    7.00
  -5   2   5  167.88    9.80
   5   2  -5  191.78    6.50
  -5   2   5  174.88   10.20
   4  -2  -5 3035.70   75.69
  -4  -2   5 2985.40   77.09
  -4  -2   5 3038.30   75.99
  -4  -2   5 3208.38   79.09
   4   2  -5 3191.58   77.49
  -4   2   5 3243.78   77.09
   3  -2  -5 1082.19   31.10
  -3  -2   5 1119.79   30.60
  -3   2   5 1097.59   30.40
   3   2  -5 1051.69   31.50
   3   2  -5 1115.19   27.90
  -3   2   5 1134.39   29.30
  -2  -2   5  171.78    7.60
   2  -2  -5  180.98    7.60
  -2   2   5  173.78    7.30
   2   2  -5  180.38    8.80
   1  -2  -5 4107.09   98.89
  -1  -2   5 4109.49   99.59
  -1   2   5 3912.21   98.29
   0  -2   5 7676.43  185.28
   1  -2   5 3894.51   98.59
  -1  -2  -5 4138.99  100.29
   1  -2   5 4092.59   99.29
   1   2   5 4091.59   97.79
   1   2   5 4087.39   99.19
   1   2   5 4028.60   98.59
   2  -2   5  180.88    6.70
   2  -2   5  175.78    7.70
  -2  -2  -5  176.18    9.50
   2   2   5  178.78    7.00
   2   2   5  179.78    7.10
  -3  -2  -5 1051.09   34.30
   3  -2   5 1091.89   28.30
   3  -2   5 1055.89   31.70
   3   2   5 1124.49   28.20
   3   2   5 1056.69   29.40
   3   2   5 1128.19   30.10
   4  -2   5 3091.09   75.49
   4  -2   5 3062.29   74.89
   4  -2   5 3251.87   82.39
  -4  -2  -5 3110.79   75.69
   4   2   5 2923.61   78.39
   4   2   5 3091.19   79.19
   4   2   5 3161.98   76.59
  -5  -2  -5  174.98    7.30
   5  -2   5  190.98   12.70
   5   2   5  188.98    9.90
   5   2   5  201.78    6.40
   5   2   5  176.78    7.30
  -6  -2  -5   54.49    6.00
   6   2   5   63.29    3.80
   6   2   5   56.49    4.30
  -6   2  -5   72.29    6.30
  -7  -2  -5  542.85   16.30
   7  -2   5  533.75   16.60
   7   2   5  530.05   14.90
   7   2   5  557.64   17.80
   8  -2   5  498.15   15.20
  -8  -2  -5  511.65   15.90
   8   2   5  514.85   14.40
   9  -2   5  190.68    8.00
  -9  -2  -5  191.78    8.50
   9   2   5  200.48    7.10
   9   2   5  176.48   10.10
   9   2   5  193.28    8.30
  10  -2   5  217.98    7.50
 -10  -2  -5  212.98    8.10
  10   2   5  222.18    8.60
  10   2   5  218.38    7.10
 -11  -2  -5   35.60    3.70
  11  -2   5   35.20    2.90
 -11  -2  -5   34.40    5.40
  11   2   5   45.20    2.60
  11   2   5   40.90    3.20
 -12  -2  -5   85.49    5.00
  12  -2   5   85.79    3.50
  12  -2   5   84.29    3.40
  12   2   5   86.79    3.30
  12   2   5   89.39    3.60
 -11  -3   5   44.70    3.70
  11   3  -5   54.79    3.10
  10  -3  -5   65.79    5.70
  10  -3  -5   65.39    3.90
 -10  -3   5   65.69    4.60
  10   3  -5   70.49    5.40
  -9  -3   5  134.39    6.70
   9  -3  -5  134.69    6.00
   9  -3  -5  129.29    8.40
   9   3  -5  123.69    6.60
   9   3  -5  129.59    8.60
  -8  -3   5  101.59    7.20
   8  -3  -5  107.39    6.10
   8  -3  -5  103.79    8.00
   8   3  -5  101.09    6.10
  -8   3   5  107.59    9.10
   8   3  -5  100.09    8.20
   7  -3  -5   40.60    5.30
   7  -3  -5   35.60    4.30
  -7  -3   5   42.80    5.80
  -7  -3   5   30.50    3.50
   7   3  -5   36.70    5.20
  -7   3   5   40.80    6.00
   7   3  -5   33.20    4.90
  -6  -3   5  731.43   20.80
   6  -3  -5  697.13   19.20
   6   3  -5  692.43   18.10
   6   3  -5  674.43   19.90
   6   3  -5  680.43   20.50
  -6   3   5  704.33   22.20
   6   3  -5  660.93   19.60
  -5  -3   5  364.56   15.20
  -5  -3   5  372.76   12.90
   5  -3  -5  380.26   11.40
  -5  -3   5  369.06   11.40
  -5   3   5  378.76   14.20
  -4  -3   5 1105.79   29.80
  -4  -3   5 1148.49   31.90
   4  -3  -5 1089.09   28.20
  -4  -3   5 1082.59   28.40
  -4   3   5 1085.59   30.50
  -3  -3   5 3508.25   87.69
  -3   3   5 3498.25   84.69
  -3   3   5 3417.26   87.69
   2  -3  -5 5032.90  120.89
  -2  -3   5 5102.99  120.99
   2   3  -5 4788.12  121.79
  -2   3   5 4848.31  118.39
  -2   3   5 4689.23  120.09
  -1  -3   5 4133.99  102.39
   1  -3  -5 4087.59  101.99
  -1   3   5 4257.47  100.59
   1   3  -5 4107.99  102.99
  -1   3   5 4072.09  101.29
   0  -3   5 1615.44   39.80
   0  -3  -5 1442.66   39.50
   0   3   5 1430.86   39.80
   0   3   5 1499.65   38.50
   0   3   5 1531.35   38.30
  -1  -3  -5 4203.08  101.19
   1  -3   5 3877.11   99.19
   1  -3   5 3988.90   99.59
   1   3   5 4013.20   98.19
   1   3   5 4024.20   99.29
   1   3   5 4196.08  100.19
  -2  -3  -5 4661.13  120.99
   2  -3   5 4864.31  117.19
   2  -3   5 4659.43  119.19
   2   3   5 5040.00  118.19
   2   3   5 4834.22  116.19
   2   3   5 4788.42  118.19
   3  -3   5 3478.35   82.09
   3  -3   5 3259.47   86.69
   3   3   5 3329.77   81.89
   3   3   5 3322.77   84.19
   4  -3   5 1113.39   36.10
  -4  -3  -5 1139.69   29.60
   4   3   5 1091.09   28.40
   4   3   5 1179.68   33.00
   4   3   5 1200.88   30.30
  -4   3  -5 1140.79   31.20
  -5  -3  -5  395.76   11.90
   5  -3   5  359.16   19.70
   5   3   5  371.86   10.50
   5   3   5  361.46   15.20
   5   3   5  379.16   12.30
  -6  -3  -5  705.33   19.90
   6   3   5  718.93   21.00
   6   3   5  713.43   18.60
   6   3   5  677.73   20.10
  -7  -3  -5   41.40    4.80
   7   3   5   36.30    4.70
   7   3   5   32.70    3.10
   7   3   5   36.80    5.50
   8  -3   5  109.49    6.90
   8   3   5  101.89    4.80
   8   3   5  107.69    6.40
   8   3   5   86.39    7.00
   9  -3   5  121.09    5.80
  -9  -3  -5  135.29    6.30
   9   3   5  126.39    5.10
   9   3   5  134.99    6.80
   9   3   5  129.59    9.20
 -10  -3  -5   65.89    4.30
  10  -3   5   62.89    4.00
  10   3   5   69.19    3.40
  10   3   5   56.39    6.30
 -11  -3  -5   55.79    4.60
 -11  -3  -5   53.99    3.80
  11  -3   5   52.19    3.20
  11   3   5   50.49    3.20
  11   3   5   50.69    2.80
  11  -4  -5   66.79    3.70
 -11  -4   5   68.89    4.10
  11   4  -5   70.29    3.40
 -10  -4   5   32.30    3.80
  10  -4  -5   35.60    4.80
  10  -4  -5   38.40    3.50
  10   4  -5   38.00    3.10
   9  -4  -5  208.88    9.70
  -9  -4   5  187.08    8.20
   9  -4  -5  204.38    7.60
   9   4  -5  212.88    8.20
   8  -4  -5   53.19    5.10
   8  -4  -5   58.29    7.10
  -8  -4   5   54.79    6.10
   8   4  -5   50.19    4.80
  -8   4   5   54.39    7.10
   8   4  -5   45.80    5.00
   7  -4  -5 1769.22   48.10
  -7  -4   5 1916.71   46.40
  -7  -4   5 1879.01   48.50
   7  -4  -5 1862.11   47.30
   7   4  -5 1809.52   47.60
  -7   4   5 1930.61   50.59
   7   4  -5 1840.82   49.50
  -6  -4   5  222.58    8.10
   6  -4  -5  226.48    8.50
  -6  -4   5  227.38    9.90
  -6   4   5  231.48   11.90
   6   4  -5  219.58    9.10
   6   4  -5  223.68    9.00
   6   4  -5  223.08   10.10
  -5  -4   5 1827.42   46.10
  -5  -4   5 1863.61   46.30
   5   4  -5 1669.33   45.20
   5   4  -5 1696.13   44.90
   5   4  -5 1828.02   45.50
  -4  -4   5  478.35   14.00
  -4  -4   5  477.95   15.50
   4  -4  -5  490.65   13.80
  -4  -4   5  479.25   18.00
  -4   4   5  489.65   16.40
  -3  -4   5  114.39    5.80
  -3  -4   5  112.59    7.80
  -3  -4   5  109.39    8.50
   3  -4  -5  119.29    5.20
  -3   4   5  115.59    7.30
  -3   4   5  116.89    8.20
  -2  -4   5  744.63   22.00
   2  -4  -5  673.53   18.40
  -2   4   5  725.43   20.40
  -2   4   5  716.83   22.00
  -2   4   5  667.83   20.60
  -1  -4   5 3460.45   87.79
  -1   4   5 3520.25   86.59
  -1   4   5 3507.45   87.29
   0  -4   5 2239.98   57.49
   0   4  -5 2253.07   58.99
   0   4   5 2278.37   56.69
   0   4   5 2181.08   58.79
   0   4   5 2237.58   57.19
   1  -4   5 3415.06   85.09
   1  -4   5 3509.55   86.49
   1   4   5 3449.55   87.79
   1   4   5 3536.25   85.49
   2  -4   5  720.23   19.90
   2   4   5  743.43   21.50
   2   4   5  660.23   17.70
   2   4   5  655.73   19.20
   3  -4   5  122.19    5.60
  -3  -4  -5  117.69    6.30
   3  -4   5  115.79   10.90
   3   4   5  114.49    4.30
   3   4   5  122.59    5.20
   3   4   5  112.09    6.80
  -4  -4  -5  499.85   14.40
   4  -4   5  457.65   21.20
   4   4   5  474.85   17.40
   4   4   5  507.15   14.70
  -4   4  -5  472.45   16.40
  -5  -4  -5 1789.22   47.20
   5  -4   5 1685.53   59.59
  -5   4  -5 1931.91   47.90
   5   4   5 1890.31   47.30
  -6  -4  -5  230.18    8.90
   6   4   5  220.58    9.40
   6   4   5  232.18    7.50
   6   4   5  240.18    9.40
  -7  -4  -5 2002.80   50.49
   7   4   5 2017.80   48.80
   7   4   5 1894.41   51.69
   8  -4   5   46.10    6.60
  -8  -4  -5   48.60    5.50
   8   4   5   35.60    6.50
   8   4   5   59.09    5.60
   8   4   5   45.80    3.70
   9  -4   5  206.28    7.70
  -9  -4  -5  201.58    8.00
   9   4   5  217.48    8.30
   9   4   5  200.88    6.70
  10  -4   5   32.80    3.70
 -10  -4  -5   42.50    3.70
  10   4   5   38.70    3.40
  10   4   5   42.30    2.60
 -11  -4  -5   67.69    3.90
 -11  -4  -5   75.29    4.40
  11  -4   5   74.19    3.60
  11   4   5   81.59    3.70
  11   4   5   73.39    3.30
 -11  -5   5   30.10    3.20
  11  -5  -5   26.00    3.20
  11   5  -5   28.80    2.40
  10  -5  -5  152.28    5.70
 -10  -5   5  146.69    6.10
  10  -5  -5  135.09    6.30
  10   5  -5  149.39    5.60
  -9  -5   5  167.68    7.30
   9  -5  -5  177.48    6.80
   9  -5  -5  176.68    9.10
   9   5  -5  186.38    7.50
  -9   5   5  169.78    9.10
   8  -5  -5  372.46   13.30
  -8  -5   5  311.37   15.90
   8   5  -5  382.36   12.00
  -8   5   5  334.47   18.90
   8   5  -5  376.76   12.30
  -7  -5   5  217.68    8.20
   7  -5  -5  211.18    8.70
  -7  -5   5  215.58    9.70
  -7   5   5  229.58   12.30
   7   5  -5  215.88    9.30
   7   5  -5  207.58    8.50
   6  -5  -5  668.63   18.60
  -6  -5   5  658.33   17.90
  -6  -5   5  607.14   19.30
   6   5  -5  645.64   18.50
   6   5  -5  637.14   18.80
   6   5  -5  652.43   18.80
  -6   5   5  636.34   22.00
   5  -5  -5  239.18    8.70
  -5  -5   5  246.88   10.20
   5   5  -5  240.68    9.90
  -5   5   5  245.58   11.90
   5   5  -5  237.78    9.70
   5   5  -5  241.28    9.40
  -4  -5   5  900.91   24.50
   4   5  -5  845.02   23.70
   4   5  -5  836.02   23.80
   4   5  -5  888.51   24.20
   3  -5  -5  511.35   14.50
  -3  -5   5  517.25   19.00
  -3  -5   5  515.85   14.90
  -3  -5   5  491.45   16.70
  -3   5   5  541.55   19.30
  -3   5   5  568.54   17.60
   2  -5  -5  331.67    9.70
  -2  -5   5  309.27   13.40
  -2  -5   5  328.47   10.50
  -2   5   5  330.27   12.30
  -2   5   5  315.07   13.10
  -2   5   5  320.17   14.50
  -1  -5   5 1521.05   41.00
   1  -5  -5 1455.35   36.90
  -1   5   5 1543.05   41.00
  -1   5   5 1447.26   38.80
   0  -5  -5   17.00    2.00
   0  -5   5   12.70    2.50
   0   5   5   22.60    3.40
   0   5   5   20.10    3.50
  -1  -5  -5 1454.05   36.80
   1  -5   5 1506.95   39.90
   1   5   5 1466.75   37.80
   1   5   5 1517.95   36.90
   1   5   5 1478.35   42.30
   1   5   5 1521.95   39.40
   2  -5   5  318.27   11.50
  -2  -5  -5  336.17    9.60
  -2  -5  -5  326.67   11.80
   2   5   5  324.97   10.30
   2   5   5  332.87    9.50
   2   5   5  336.07   13.60
   2   5   5  351.76   11.30
   3  -5   5  478.25   21.30
  -3  -5  -5  502.85   13.90
  -3  -5  -5  520.65   15.00
   3   5   5  490.35   18.20
  -3   5  -5  493.65   18.30
   3   5   5  539.85   15.60
  -4  -5  -5  917.01   23.90
   4  -5   5  839.22   34.10
   4   5   5  876.11   22.50
  -4   5  -5  897.01   26.00
  -4   5  -5  851.21   28.20
   4   5   5  915.91   24.90
  -5  -5  -5  238.88    9.00
  -5  -5  -5  199.78   11.20
  -5   5  -5  251.27   11.60
   5   5   5  229.38    9.60
   5   5   5  236.18    7.40
   5   5   5  242.78    9.30
  -6  -5  -5  653.73   19.00
   6   5   5  625.14   18.80
   6   5   5  653.73   20.10
   6   5   5  667.43   17.40
  -7  -5  -5  207.48    8.80
   7   5   5  195.98    8.50
   7   5   5  200.28    9.60
   7   5   5  209.28    7.00
   8  -5   5  386.86   12.20
   8   5   5  371.36   12.10
   8   5   5  354.86   14.60
  -9  -5  -5  175.48    7.10
   9  -5   5  168.98    6.90
   9   5   5  172.28    5.70
   9   5   5  170.48    7.40
  10  -5   5  144.49    5.80
 -10  -5  -5  145.09    6.10
  10   5   5  149.88    5.60
  11  -5   5   36.10    3.10
 -11  -5  -5   24.90    3.10
 -11  -5  -5   32.70    3.10
  11   5   5   33.00    3.40
  10  -6  -5  307.87    9.10
  10  -6  -5  296.67    9.60
 -10  -6   5  307.47    9.60
  10   6  -5  300.97    9.00
   9  -6  -5   15.30    3.00
  -9  -6   5   15.90    2.50
   9  -6  -5   11.20    2.20
   9   6  -5   23.50    2.90
  -9   6   5   15.50    3.80
   8  -6  -5   99.19    5.20
   8  -6  -5  103.59    7.50
  -8  -6   5   94.99    5.70
   8   6  -5  102.79    7.30
  -8   6   5  112.19    8.00
   8   6  -5   98.49    5.80
  -7  -6   5  131.69    7.70
   7  -6  -5  125.89    6.90
  -7  -6   5  116.59    6.20
   7   6  -5  127.39    7.30
  -7   6   5  124.69   10.60
   7   6  -5  117.79    6.50
  -6  -6   5   75.19    6.80
  -6  -6   5   71.39    4.90
   6  -6  -5   82.39    5.60
   6   6  -5   83.39    6.50
  -6   6   5   80.79    9.60
   6   6  -5   82.09    5.90
  -5  -6   5  422.46   12.70
  -5  -6   5  405.66   14.20
   5  -6  -5  422.06   13.00
   5   6  -5  424.46   13.40
  -5   6   5  433.56   16.90
   5   6  -5  399.76   13.40
   5   6  -5  407.86   13.60
  -4  -6   5  130.49    5.90
   4  -6  -5  125.69    6.00
  -4  -6   5  133.39    8.60
   4   6  -5  126.49    7.10
  -4   6   5  137.89    9.50
   4   6  -5  131.49    7.40
   4   6  -5  132.09    7.20
  -4   6   5  123.69   11.20
   3  -6  -5  426.16   12.30
  -3  -6   5  427.06   12.60
  -3   6   5  402.06   17.60
   3   6  -5  424.76   13.90
   3   6  -5  405.26   13.50
   3   6  -5  409.16   13.20
  -3   6   5  420.66   17.00
  -3   6   5  423.76   15.70
   2  -6  -5  648.74   17.30
  -2  -6   5  625.14   17.60
   2   6  -5  639.94   18.30
  -2   6   5  653.43   20.30
  -2   6   5  627.24   22.30
   1  -6  -5 1094.59   27.30
  -1  -6   5 1080.29   31.90
  -1  -6   5 1057.49   27.80
  -1   6   5 1037.10   31.90
  -1   6   5 1094.09   29.80
   0  -6   5   32.50    4.50
   0  -6   5   20.40    3.80
   0  -6  -5   34.30    3.10
   0   6   5   28.50    4.60
   0   6   5   31.30    4.20
   1  -6   5 1049.79   30.30
  -1  -6  -5 1059.19   26.80
   1   6   5  984.60   33.70
   1   6   5 1121.89   30.60
   1   6   5 1070.99   27.20
   1   6   5 1072.89   28.30
  -2  -6  -5  601.14   18.50
  -2  -6  -5  626.34   16.60
   2   6   5  644.94   19.50
   2   6   5  618.74   16.70
   2   6   5  640.84   17.90
  -3  -6  -5  406.76   11.80
  -3  -6  -5  433.16   13.60
  -3  -6  -5  419.56   13.90
   3   6   5  391.66   13.60
   3   6   5  424.36   13.00
   3   6   5  409.06   11.70
   3   6   5  428.76   14.30
  -3   6  -5  414.26   16.00
  -4  -6  -5  118.59    7.40
  -4  -6  -5  147.69    7.10
   4   6   5  120.79    7.30
   4   6   5  126.49    6.10
   4   6   5  125.29    6.80
   4   6   5  131.59    5.20
  -4   6  -5  114.69    9.90
  -5  -6  -5  402.66   14.10
  -5  -6  -5  421.76   13.40
   5   6   5  437.06   14.70
   5   6   5  401.46   13.20
  -5   6  -5  402.56   15.80
  -6  -6  -5   79.49    6.00
  -6  -6  -5   60.79    6.50
   6   6   5   83.09    6.00
   6   6   5   73.99    6.50
  -7  -6  -5  121.79    7.00
   7   6   5  111.99    8.80
   7   6   5  125.69    6.60
   8  -6   5   97.89    6.10
  -8  -6  -5   87.69    5.30
   8   6   5   95.69    5.90
  -9  -6  -5   16.20    2.20
   9  -6   5   16.90    2.80
   9   6   5   24.00    3.10
   9   6   5   16.20    2.40
   9   6   5   17.20    2.10
 -10  -6  -5  287.67    9.20
  10  -6   5  299.67    8.90
  10   6   5  262.27    9.50
  10   6   5  300.87    8.70
  10  -7  -5  156.88    6.00
 -10  -7   5  159.28    6.00
  10   7  -5  162.88    5.40
   9  -7  -5  106.19    5.40
   9  -7  -5  106.39    4.80
   9   7  -5  102.69    4.40
   8  -7  -5  214.08    8.60
   8  -7  -5  217.08    7.90
  -8  -7   5  218.88    8.20
   8   7  -5  228.28    7.90
  -8   7   5  222.88   10.30
   7  -7  -5  236.28    8.50
  -7  -7   5  220.88    7.50
  -7  -7   5  233.78    9.00
   7   7  -5  235.98    8.90
  -7   7   5  218.88   11.10
   7   7  -5  252.87    9.20
   6  -7  -5  419.76   13.50
  -6  -7   5  413.86   14.30
  -6  -7   5  416.76   12.60
  -6   7   5  432.06   17.80
   6   7  -5  410.76   13.30
   6   7  -5  419.36   13.20
   5  -7  -5 1281.17   32.90
  -5  -7   5 1254.67   32.30
  -5  -7   5 1239.78   33.50
  -5   7   5 1269.17   37.00
   5   7  -5 1214.38   32.60
   5   7  -5 1241.48   33.00
   5   7  -5 1237.78   33.00
  -4  -7   5   86.69    5.00
   4  -7  -5   79.39    5.10
  -4   7   5   69.89    9.10
   3  -7  -5  397.26   11.90
   3  -7  -5  368.36   16.10
  -3  -7   5  374.86   11.80
   3   7  -5  389.86   12.90
  -3   7   5  395.16   15.60
  -3   7   5  371.26   17.80
   3   7  -5  390.86   12.40
  -3   7   5  401.06   15.70
   3   7  -5  371.56   12.70
   2  -7  -5  397.76   15.20
  -2  -7   5  436.06   12.80
   2  -7  -5  419.86   12.50
  -2   7   5  418.56   18.20
  -2   7   5  430.36   16.40
  -2   7   5  410.76   15.80
   2   7  -5  432.36   14.00
   2   7  -5  426.76   13.40
   2   7  -5  447.06   14.20
   1  -7  -5  637.14   19.40
  -1  -7   5  639.94   17.70
   1  -7  -5  652.23   17.30
  -1   7   5  638.04   22.90
   1   7  -5  633.04   19.30
  -1   7   5  640.94   20.50
   1   7  -5  633.24   18.10
   1   7  -5  637.04   19.20
  -1   7   5  629.64   20.40
   0  -7  -5    4.80    3.60
   0  -7  -5    3.70    1.90
   0   7   5   -0.60    3.00
   0   7   5   -0.50    3.30
   0   7  -5    9.50    4.50
   0   7   5    1.50    4.50
   0   7  -5    7.30    3.20
  -1  -7  -5  625.94   18.40
  -1  -7  -5  647.74   16.90
   1  -7   5  611.04   17.50
  -1   7  -5  620.64   19.60
   1   7   5  631.74   19.00
   1   7   5  624.34   21.10
   1   7   5  608.34   19.00
  -2  -7  -5  408.06   13.60
  -2  -7  -5  423.16   11.90
   2   7   5  409.86   13.90
   2   7   5  403.96   13.60
   2   7   5  418.86   15.60
  -2   7  -5  415.26   15.60
  -3  -7  -5  386.26   11.30
  -3  -7  -5  376.26   12.90
   3   7   5  366.06   12.70
   3   7   5  369.36   14.30
  -3   7  -5  391.66   15.20
   3   7   5  383.46   12.70
  -4  -7  -5   90.49    7.40
   4   7   5   93.29    6.10
   4   7   5   64.89    5.00
   4   7   5   77.99    7.00
  -5  -7  -5 1247.38   32.80
  -5  -7  -5 1242.08   33.10
   5   7   5 1256.47   35.60
   5   7   5 1206.88   32.50
   5   7   5 1214.88   31.30
   5   7   5 1243.58   32.60
  -6  -7  -5  420.26   13.90
  -6  -7  -5  417.66   14.50
   6   7   5  430.26   13.50
   6   7   5  411.86   17.00
   6   7   5  435.56   13.70
  -7  -7  -5  239.48    8.80
   7  -7   5  228.48    8.90
   7   7   5  232.98    8.90
   7   7   5  233.18    8.50
  -8  -7  -5  219.98    8.10
   8  -7   5  223.38    8.10
   8   7   5  214.68    8.00
   8   7   5  210.28    7.60
   9  -7   5  100.19    5.70
  -9  -7  -5  107.19    5.20
   9   7   5  107.99    4.70
 -10  -7  -5  135.39    5.70
  10   7   5  160.18    5.20
   9  -8  -5   41.30    3.40
   9  -8  -5   41.70    3.70
   9   8  -5   38.70    2.70
   8  -8  -5  152.08    5.90
   8  -8  -5  154.98    6.30
  -8  -8   5  151.48    7.20
  -8   8   5  140.99    7.80
   8   8  -5  143.99    5.60
   7  -8  -5  403.66   12.00
  -7  -8   5  397.96   12.50
  -7  -8   5  377.26   11.00
  -7   8   5  380.46   14.50
   7   8  -5  389.96   11.60
   7   8  -5  399.16   12.00
  -6  -8   5  165.48    6.00
   6  -8  -5  166.48    6.70
   6   8  -5  164.88    7.60
   6   8  -5  171.78    7.50
  -6   8   5  144.29    9.10
   5  -8  -5   42.50    6.50
  -5  -8   5   49.30    5.50
  -5   8   5   31.60   10.00
   5   8  -5   59.69    5.40
   5   8  -5   49.80    5.10
  -4  -8   5  317.27   10.50
   4  -8  -5  324.57   10.80
   4   8  -5  313.97   10.80
   4   8  -5  324.07   11.30
  -4   8   5  309.57   15.10
  -3  -8   5 1457.15   37.30
   3  -8  -5 1516.65   37.50
   3  -8  -5 1397.86   39.40
   3   8  -5 1438.56   37.60
   3   8  -5 1478.05   38.30
  -3   8   5 1459.35   40.20
  -3   8   5 1436.46   41.30
   3   8  -5 1475.35   37.90
   2  -8  -5 1473.55   39.50
  -2  -8   5 1481.55   37.80
   2  -8  -5 1497.05   37.70
  -2   8   5 1440.26   40.20
  -2   8   5 1486.65   41.40
  -2   8   5 1454.95   45.90
   2   8  -5 1517.15   38.20
   2   8  -5 1491.35   39.00
  -1  -8   5  235.88    8.60
   1  -8  -5  255.77    8.50
  -1   8   5  242.98   13.40
  -1   8   5  237.68   12.00
  -1   8   5  256.47   14.30
   1   8  -5  249.08   10.80
   0  -8   5  261.97    9.00
   0  -8  -5  272.87    8.70
   0   8   5  248.68   13.80
   0   8   5  263.07   12.00
   0   8   5  266.87   11.50
   0   8  -5  247.38   11.40
  -1  -8  -5  246.78   10.50
  -1  -8  -5  250.17    8.20
   1  -8   5  239.38    8.50
   1   8   5  235.58   13.00
   1   8   5  240.38   11.50
   1   8   5  249.78   11.10
  -1   8  -5  230.48   16.50
  -2  -8  -5 1471.15   38.50
  -2  -8  -5 1505.85   36.90
   2  -8   5 1462.85   37.00
  -2   8  -5 1488.65   40.10
   2   8   5 1438.16   39.10
   2   8   5 1445.46   38.50
   2   8   5 1433.36   42.60
  -3  -8  -5 1449.35   36.40
   3  -8   5 1443.56   36.60
  -3  -8  -5 1433.36   38.10
   3   8   5 1446.46   42.10
  -3   8  -5 1454.25   39.90
   3   8   5 1414.76   38.00
   3   8   5 1490.65   38.60
  -4  -8  -5  301.37   11.50
   4  -8   5  307.97   10.50
   4   8   5  312.57   11.40
   4   8   5  319.87   12.10
  -4   8  -5  320.77   13.80
   4   8   5  306.87   15.70
   5  -8   5   48.80    6.30
  -5  -8  -5   59.09    6.20
   5   8   5   45.30    5.30
   5   8   5   54.39    7.80
   6  -8   5  167.88    7.40
  -6  -8  -5  170.98    8.80
  -6  -8  -5  152.48    7.50
   6   8   5  155.38    7.40
   6   8   5  171.98    7.60
  -7  -8  -5  397.06   12.40
   7  -8   5  395.36   12.40
   7   8   5  384.36   12.70
   7   8   5  418.96   12.20
  -8  -8  -5  135.39    6.40
   8  -8   5  136.59    6.50
   8   8   5  147.49    5.50
   9  -8   5   39.40    4.80
   9   8   5   39.70    4.20
   8  -9  -5    4.60    2.00
   8  -9  -5   10.60    2.00
  -8   9   5    6.60    3.30
   8   9  -5    3.40    1.60
   7  -9  -5  100.29    4.70
   7  -9  -5  102.19    4.90
  -7   9   5   96.19    6.90
   7   9  -5  102.39    4.60
   6  -9  -5  547.75   15.40
  -6  -9   5  534.75   14.50
   6   9  -5  544.35   15.60
  -6   9   5  533.15   18.00
   5  -9  -5   51.19    3.80
  -5  -9   5   53.39    3.30
  -5   9   5   53.29    7.10
   5   9  -5   46.40    5.20
   4  -9  -5  259.27    8.80
  -4  -9   5  256.87    8.50
   4   9  -5  263.37   10.00
  -4   9   5  273.97   12.20
   3  -9  -5  290.77   13.50
   3   9  -5  315.17   11.50
  -3   9   5  306.77   13.30
  -2  -9   5  211.48    7.90
   2  -9  -5  206.78    7.90
   2  -9  -5  201.28   10.50
  -2   9   5  181.28   15.70
  -2   9   5  203.28   10.80
  -2   9   5  217.98   12.20
   2   9  -5  223.18    9.60
   1  -9  -5  154.88    8.60
   1  -9  -5  144.69    6.30
  -1  -9   5  147.49    6.40
   1   9  -5  133.79    8.30
  -1   9   5  132.49    9.30
  -1   9   5  117.49   14.00
  -1   9   5  137.19   10.20
   0  -9  -5    4.90    3.50
   0  -9  -5   -0.10    2.10
   0  -9   5   -2.60    2.10
   0   9   5   -1.10    4.00
   0   9   5    2.00    6.80
   0   9   5    7.10    5.00
   0   9  -5    2.90    4.00
   1  -9   5  144.19    6.30
  -1  -9  -5  142.09    7.80
  -1  -9  -5  136.29    6.20
   1   9   5  139.09    9.80
   1   9   5  114.29   13.60
  -1   9  -5  152.98    9.50
   1   9   5  134.09    8.60
   2  -9   5  221.18    7.90
  -2  -9  -5  201.38    9.40
  -2  -9  -5  213.28    8.00
  -2   9  -5  214.68   11.00
   2   9   5  214.88    9.80
   2   9   5  218.18   11.30
  -3  -9  -5  318.97   11.50
   3  -9   5  295.77    9.80
  -3   9  -5  314.07   13.40
   3   9   5  287.27   12.30
   3   9   5  304.57   11.50
   3   9   5  270.77   18.70
  -4  -9  -5  264.77   10.30
   4  -9   5  258.77    8.50
   4   9   5  274.67   10.30
   4   9   5  247.48   10.30
   5  -9   5   49.99    4.40
  -5  -9  -5   47.60    5.90
   5   9   5   46.00    6.50
   5   9   5   46.90    5.40
   6  -9   5  535.45   15.30
  -6  -9  -5  543.65   15.70
   6   9   5  546.65   15.60
   7  -9   5  103.59    5.80
   7   9   5  102.19    4.80
   8  -9   5    2.00    3.00
   8   9   5    6.40    2.30
   7 -10  -5  335.77    9.80
   7 -10  -5  331.27    9.50
  -7 -10   5  325.77    9.50
   7  10  -5  327.07    9.60
  -7  10   5  336.17   11.10
  -6 -10   5  146.69    5.50
  -6  10   5  160.48    8.10
   6  10  -5  166.08    6.00
  -5 -10   5  577.54   15.30
   5 -10  -5  572.14   15.90
   5  10  -5  577.74   16.40
  -5  10   5  575.24   18.30
   4 -10  -5  209.88    7.30
  -4 -10   5  208.28    6.90
  -4  10   5  212.88   10.20
   4  10  -5  210.68    8.00
   3 -10  -5    3.70    4.80
  -3 -10   5    7.00    1.60
   3 -10  -5    5.20    1.90
  -3  10   5    3.90    4.20
   3  10  -5    8.50    3.10
  -3  10   5   12.80    4.40
   2 -10  -5  116.19    5.00
  -2 -10   5  104.19    4.60
   2 -10  -5  112.19    8.20
   2  10  -5  115.39    7.50
  -2  10   5  106.99    8.20
  -2  10   5   99.49    8.30
   1 -10  -5   67.59    6.90
  -1 -10   5   63.79    3.60
   1 -10  -5   63.79    3.90
   1  10  -5   65.79    6.60
  -1  10   5   64.69    7.60
  -1  10   5   61.69    7.30
   0 -10  -5   90.89    4.50
   0 -10   5   94.19    4.40
   0 -10  -5   98.29    7.10
   0  10   5   93.69    7.90
   0  10   5   87.99    8.00
   0  10  -5   97.99    7.50
  -1 -10  -5   66.29    3.90
  -1 -10  -5   56.39    6.20
   1 -10   5   61.49    3.60
   1  10   5   52.69    7.30
   1  10   5   60.19    7.10
  -1  10  -5   61.29    7.00
  -2 -10  -5  107.59    5.30
  -2 -10  -5  112.89    7.00
   2 -10   5  107.79    4.70
   2  10   5  122.09    7.60
   2  10   5  105.19    8.40
  -2  10  -5  104.49    8.50
   3 -10   5    7.50    1.90
  -3 -10  -5    2.40    3.10
   3  10   5   11.50    5.10
   3  10   5    8.50    3.70
  -3  10  -5   11.00    4.50
  -4 -10  -5  215.28    8.00
   4 -10   5  209.88    7.20
   4  10   5  199.48    7.90
  -5 -10  -5  564.14   16.00
   5 -10   5  555.94   15.30
   5  10   5  551.24   15.90
   6 -10   5  152.38    6.30
  -6 -10  -5  158.38    6.50
   6  10   5  157.88    6.10
  -7 -10  -5  326.87    9.70
   7  10   5  331.67    9.60
  -5 -11   5   67.39    3.40
   5 -11  -5   54.39    3.80
  -5 -11   5   61.69    3.70
  -5  11   5   62.19    7.00
   5  11  -5   60.99    3.70
  -4 -11   5   16.10    2.40
   4 -11  -5   23.70    3.20
   4  11  -5   18.30    2.40
  -4  11   5   22.70    4.70
  -3 -11   5   96.29    4.00
   3 -11  -5  103.89    4.60
   3  11  -5   93.69    5.10
   2 -11  -5  200.78    8.60
  -2 -11   5  225.18    6.90
   2 -11  -5  215.48    7.20
  -2  11   5  219.98    8.70
   2  11  -5  227.38    8.30
  -2  11   5  218.28   10.40
   1 -11  -5  153.38    5.80
  -1 -11   5  158.78    5.50
   1 -11  -5  154.48    7.00
  -1  11   5  146.39    9.50
  -1  11   5  157.78    7.30
   1  11  -5  151.68    6.90
   0 -11  -5   -0.80    2.40
   0 -11   5    0.80    1.40
   0 -11  -5    6.40    2.20
   0  11   5   -4.40    5.50
   0  11  -5    4.40    2.80
   0  11   5    3.20    2.80
   1 -11   5  154.48    6.20
   1 -11   5  157.88    5.50
  -1 -11  -5  152.68    6.20
  -1 -11  -5  152.98    6.50
   1  11   5  150.58   14.00
   1  11   5  155.08    7.10
  -1  11  -5  145.79    7.10
   2 -11   5  204.28    6.80
  -2 -11  -5  208.48    7.80
  -2  11  -5  224.98    8.80
   2  11   5  210.18    8.10
  -3 -11  -5   93.19    4.80
   3 -11   5   91.59    4.20
   3  11   5   95.19    5.20
  -4 -11  -5   22.20    3.20
   4 -11   5   22.00    3.20
   4  11   5   15.50    2.60
   5 -11   5   65.09    4.10
  -5 -11  -5   52.99    4.00
   5  11   5   65.29    4.70
  -2 -12   5   95.39    4.10
  -2 -12   5   93.99    3.70
   2  12  -5   89.99    4.60
   1 -12  -5   20.40    3.90
  -1 -12   5   28.00    2.40
  -1 -12   5   24.80    3.00
   1  12  -5   21.90    2.60
   0 -12  -5  596.94   16.50
   0 -12   5  577.24   16.00
   0 -12   5  601.64   15.50
   0  12   5  591.14   16.60
   0  12  -5  595.14   16.70
   1 -12   5   27.20    2.60
   1 -12   5   28.50    4.40
  -1 -12  -5   35.60    3.40
   1  12   5   22.30    2.70
  -1  12  -5   23.60    2.80
  -2 -12  -5   98.99    4.70
   2 -12   5   87.59    3.80
  12   0  -6  117.09    4.40
  11   0  -6   68.09    3.80
 -11   0   6   61.69    5.00
  10   0  -6   70.49    4.00
 -10   0   6   71.59    5.20
  -9   0   6   25.50    4.30
   9   0  -6   26.90    4.70
   9   0  -6   27.30    4.00
  -8   0   6   17.40    4.00
   8   0  -6   12.80    2.50
   8   0  -6    9.40    4.40
   7   0  -6   53.29    7.40
   7   0  -6   58.69    4.30
  -7   0   6   64.99    6.60
  -6   0   6  235.08   12.80
   6   0  -6  196.98   10.60
   6   0  -6  191.98   16.50
   6   0  -6  230.28    7.60
  -6   0   6  220.58    8.70
  -6   0   6  218.38    9.80
   5   0  -6  291.87    9.20
  -5   0   6  303.77   10.00
  -5   0   6  299.47   11.50
  -4   0   6 2475.55   60.59
   4   0  -6 2285.87   62.29
  -4   0   6 2540.15   62.59
   3   0  -6 2286.77   57.79
  -3   0   6 2310.17   58.69
  -2   0   6   55.39    3.90
  -2   0   6   55.99    3.90
   2   0  -6   58.89    3.30
   1   0  -6  111.39    4.40
  -1   0   6  112.29    4.40
   0   0   6 3838.62   93.19
   0   0  -6 3932.81   94.69
   1   0   6  105.49    4.30
   1   0   6  106.19    3.80
  -1   0  -6  101.29    6.60
  -2   0  -6   53.39    5.90
   2   0   6   53.49    3.00
   2   0   6   52.29    3.50
   3   0   6 2317.37   57.39
   3   0   6 2292.77   59.49
   4   0   6 2502.85   63.19
   4   0   6 2548.95   66.59
  -5   0  -6  296.67    9.90
   5   0   6  299.97   14.10
  -6   0  -6  219.88    8.40
   6   0   6  222.18    8.40
   7   0   6   70.29    4.90
  -7   0  -6   58.39    5.10
   8   0   6   12.10    2.60
  -8   0  -6   14.60    3.30
   9   0   6   28.20    3.90
  -9   0  -6   33.20    5.30
   9   0   6   22.30    4.40
  -9   0  -6   36.20    5.70
  10   0   6   66.79    3.70
 -10   0  -6   72.49    4.80
 -11   0  -6   58.79    5.70
  11   0   6   67.29    3.30
  11   0   6   69.09    3.80
  12   0   6  117.29    4.00
  12   0   6  113.79    4.30
  12  -1  -6  318.67    9.00
  12   1  -6  322.77    9.00
  11  -1  -6   18.30    2.90
 -11  -1   6   15.20    2.50
  11   1  -6   19.00    2.80
  10  -1  -6  123.89    5.00
 -10  -1   6  124.79    6.40
 -10   1   6  124.69    6.70
  10   1  -6  122.39    6.90
  10   1  -6  131.39    6.40
  -9  -1   6  610.04   19.10
   9  -1  -6  615.24   17.20
   9  -1  -6  614.54   18.80
  -9   1   6  621.34   19.20
   9   1  -6  599.94   18.50
   9   1  -6  592.04   16.60
   8  -1  -6  864.31   22.90
  -8  -1   6  874.21   25.00
   8  -1  -6  838.62   24.50
   8   1  -6  809.52   24.10
  -8   1   6  877.61   24.90
   8   1  -6  828.22   22.20
   7  -1  -6  667.53   18.50
   7  -1  -6  678.73   20.30
  -7  -1   6  648.74   20.40
   7   1  -6  711.53   20.50
   7   1  -6  683.33   18.10
  -7   1   6  662.83   20.50
  -7   1   6  672.13   21.70
   6  -1  -6  253.27    8.30
  -6  -1   6  232.68    8.70
   6  -1  -6  234.88   10.80
  -6  -1   6  222.18   10.80
  -6  -1   6  219.88   12.40
  -6   1   6  231.18   10.40
   6   1  -6  266.17    8.00
  -6   1   6  241.38   12.40
   6   1  -6  241.78   11.40
  -5  -1   6 2177.18   55.59
  -5  -1   6 2051.09   52.19
   5  -1  -6 2121.89   51.89
  -5  -1   6 2093.89   53.69
   5   1  -6 2063.69   57.09
  -5   1   6 2137.99   52.29
  -5   1   6 2125.39   53.69
   5   1  -6 2074.19   51.49
  -5   1   6 2099.99   54.49
   4  -1  -6 1001.90   29.90
  -4  -1   6  912.01   30.80
  -4  -1   6  990.30   26.10
  -4  -1   6  981.30   27.40
  -4   1   6 1082.19   28.10
   4   1  -6 1040.70   29.10
  -3  -1   6 1105.79   31.50
   3  -1  -6 1166.38   31.30
  -3   1   6 1102.89   30.80
   3   1  -6 1142.79   29.40
  -3   1   6 1188.68   31.00
  -2  -1   6  520.35   16.10
   2  -1  -6  505.35   15.00
   2   1  -6  526.85   13.40
  -2   1   6  499.75   15.10
   1  -1  -6   19.70    2.50
  -1  -1   6   16.20    2.30
   1   1  -6   17.50    1.60
  -1   1   6   17.70    2.40
   0  -1   6   27.00    1.60
   0  -1   6   27.10    1.60
   0  -1   6   23.70    3.00
   0   1   6   30.40    2.20
   0   1  -6   24.30    2.60
   0   1   6   29.60    2.30
  -1  -1  -6   19.60    3.70
   1  -1   6   15.80    1.70
   1  -1   6   17.30    1.70
   1   1   6   17.70    1.80
   1   1   6   19.20    2.00
   2  -1   6  506.75   15.30
  -2  -1  -6  485.45   17.70
   2   1   6  499.65   15.10
   2   1   6  516.15   13.80
   3  -1   6 1160.68   32.00
  -3  -1  -6 1077.59   35.30
   3   1   6 1107.29   29.10
   3   1   6 1121.29   29.90
   3   1   6 1150.08   31.20
   4  -1   6 1071.39   32.20
   4  -1   6 1065.99   28.00
  -4  -1  -6 1007.10   27.40
   4   1   6 1093.29   31.20
   4   1   6 1071.29   28.40
   4   1   6 1058.49   29.70
   5  -1   6 2237.28   60.59
  -5  -1  -6 2179.48   53.39
  -5   1  -6 2105.09   53.09
   5   1   6 2071.99   52.39
   5   1   6 2079.49   54.49
   5   1   6 2163.08   58.79
  -6  -1  -6  245.98    9.30
  -6   1  -6  265.07    9.40
   6   1   6  263.17   10.20
   6   1   6  256.77    8.40
  -7  -1  -6  698.23   19.80
   7  -1   6  669.73   19.20
   7   1   6  688.03   18.50
  -7   1  -6  679.33   19.60
   7   1   6  690.73   21.60
  -7   1  -6  716.73   22.20
  -8  -1  -6  881.11   24.20
   8  -1   6  843.92   23.20
   8   1   6  858.41   22.80
  -8   1  -6  889.11   24.20
   8   1   6  857.11   28.20
   9  -1   6  555.04   21.00
   9  -1   6  609.54   17.20
  -9  -1  -6  605.84   18.20
   9   1   6  616.74   20.80
  -9   1  -6  638.04   18.50
   9   1   6  622.14   16.90
 -10  -1  -6  125.39    5.90
  10  -1   6  127.79    5.20
  10   1   6  137.49    6.70
  10   1   6  125.09    5.00
 -11  -1  -6   18.10    2.70
  11  -1   6   16.70    2.40
  11   1   6   12.20    1.60
  11   1   6   17.30    2.10
  12  -1   6  316.17    8.50
  12  -1   6  304.97    8.60
  12   1   6  305.27    8.60
  11  -2  -6   27.30    3.70
  11  -2  -6   33.00    5.20
 -11  -2   6   39.30    3.70
  11   2  -6   30.30    2.90
  10  -2  -6  220.68    8.60
  10  -2  -6  218.08    7.30
 -10  -2   6  211.48    8.40
  10   2  -6  231.38    8.50
  10   2  -6  212.88    8.40
   9  -2  -6  105.79    7.80
   9   2  -6  101.99    6.00
   9   2  -6   94.89    7.30
   8  -2  -6  279.57    9.60
  -8  -2   6  288.37   11.50
   8  -2  -6  262.67   11.30
  -8   2   6  271.97   13.10
   8   2  -6  261.27   11.10
  -8   2   6  287.77   11.90
  -7  -2   6  102.69    6.30
  -7  -2   6  115.39    7.40
   7  -2  -6  113.79    5.80
   7  -2  -6  108.29    7.80
   7   2  -6  108.09    5.30
  -7   2   6  111.99    9.40
   7   2  -6  108.99    8.50
  -7   2   6  118.99    8.80
   6  -2  -6  506.85   14.30
  -6  -2   6  503.05   14.40
   6  -2  -6  499.35   16.10
  -6  -2   6  466.45   19.20
  -6  -2   6  482.35   16.00
   6   2  -6  490.15   13.60
   6   2  -6  465.05   16.10
   6   2  -6  493.85   16.10
  -6   2   6  499.55   16.50
  -6   2   6  504.45   17.50
  -5  -2   6 2782.92   67.49
   5  -2  -6 2694.63   67.19
  -5  -2   6 2830.52   71.49
  -5  -2   6 2837.62   68.99
  -5   2   6 2786.82   69.69
  -5   2   6 2687.43   68.79
   5   2  -6 2590.54   66.39
  -4  -2   6  853.31   22.70
   4  -2  -6  836.42   22.30
  -4  -2   6  887.21   26.00
  -4  -2   6  870.11   24.20
  -4   2   6  864.01   24.20
  -4   2   6  815.72   24.80
  -3  -2   6  756.32   22.50
   3  -2  -6  686.33   22.20
  -3   2   6  711.63   21.80
  -3   2   6  758.12   21.20
  -2  -2   6  469.25   15.60
   2  -2  -6  472.65   15.00
  -2   2   6  478.65   14.80
  -1  -2   6  816.82   23.80
   1  -2  -6  862.31   23.20
  -1   2   6  823.02   22.50
   0  -2   6 3435.16   84.29
   0  -2  -6 3363.26   83.89
   0   2   6 3266.27   83.79
   0   2   6 3471.65   82.39
  -1  -2  -6  837.72   24.60
   1  -2   6  823.62   23.50
   1  -2   6  819.02   22.00
   1   2   6  841.42   22.80
   1   2   6  864.91   21.90
   1   2   6  840.62   23.20
   2  -2   6  467.55   14.90
   2  -2   6  444.06   14.20
  -2  -2  -6  444.36   17.50
   2   2   6  478.15   14.60
   2   2   6  477.05   14.60
   2   2   6  477.75   13.20
   3  -2   6  727.13   22.80
   3  -2   6  711.63   20.20
   3   2   6  718.53   19.50
   3   2   6  741.53   21.50
   3   2   6  680.83   21.20
  -4  -2  -6  854.61   22.60
   4  -2   6  856.11   23.20
   4  -2   6  852.21   22.80
   4  -2   6  914.41   28.30
   4   2   6  726.73   24.00
   4   2   6  823.02   21.60
   4   2   6  900.31   26.00
  -5  -2  -6 2924.21   70.19
   5  -2   6 2879.41   78.59
   5   2   6 2979.70   75.69
   5   2   6 2755.02   71.19
   5   2   6 2811.92   68.99
  -5   2  -6 2723.73   69.89
  -6  -2  -6  500.35   15.20
  -6   2  -6  508.45   15.50
   6   2   6  512.35   16.30
  -7  -2  -6  117.19    6.30
   7   2   6  101.49    6.60
   7   2   6  109.49    5.00
   8  -2   6  250.47    9.80
  -8  -2  -6  268.27   10.20
   8   2   6  276.37    8.80
   8   2   6  287.17   10.50
   8   2   6  266.57   11.60
   9   2   6   88.69    8.30
   9   2   6   89.29    6.10
  10  -2   6  211.38    7.30
 -10  -2  -6  220.58    8.20
  10   2   6  221.28    7.10
 -11  -2  -6   34.70    3.50
  11  -2   6   30.90    2.70
 -11  -2  -6   26.70    3.60
  11   2   6   34.60    2.30
  11   2   6   29.60    3.00
 -11  -3   6   50.59    3.80
  11  -3  -6   47.90    3.70
  11   3  -6   48.30    3.10
  10  -3  -6   70.09    4.00
 -10  -3   6   75.89    4.80
  10  -3  -6   69.29    5.60
  10   3  -6   71.99    4.20
  -9  -3   6  146.79    7.10
   9  -3  -6  150.58    8.60
   9  -3  -6  142.79    6.10
   9   3  -6  141.59    8.30
   9   3  -6  156.28    7.20
   8  -3  -6  327.07   12.70
   8  -3  -6  319.97   11.10
  -8  -3   6  340.37   12.60
   8   3  -6  325.17   12.00
  -8   3   6  339.57   14.50
   8   3  -6  322.17   11.30
  -7  -3   6  301.37   10.10
  -7  -3   6  308.27   12.00
   7  -3  -6  298.77   12.10
   7  -3  -6  318.87   10.40
   7   3  -6  303.27   10.80
  -7   3   6  300.87   13.50
   7   3  -6  285.17   11.50
  -6  -3   6  254.67   10.50
   6  -3  -6  232.88   10.40
  -6  -3   6  244.68    8.70
   6  -3  -6  259.07    8.90
   6   3  -6  239.38    9.60
  -6   3   6  250.47   12.20
   6   3  -6  255.97   10.80
   6   3  -6  240.68   10.20
   5  -3  -6  304.57    9.90
  -5  -3   6  309.97   10.10
  -5  -3   6  304.77   11.60
  -5  -3   6  293.77   14.10
  -5   3   6  307.57   12.80
  -4  -3   6   13.90    3.50
   4  -3  -6    9.20    2.30
  -4  -3   6    5.40    3.00
  -4   3   6    7.70    4.00
  -3  -3   6 1402.36   37.40
   3  -3  -6 1287.97   33.10
  -3  -3   6 1268.37   34.90
  -3  -3   6 1250.07   33.50
  -3   3   6 1395.86   34.40
  -3   3   6 1264.07   35.20
  -3   3   6 1359.46   37.10
   2  -3  -6  198.88   10.00
  -2  -3   6  193.48    9.20
  -2   3   6  202.48    7.90
  -2   3   6  180.28    8.60
  -1  -3   6 5521.65  133.99
   1  -3  -6 5490.45  133.39
  -1   3   6 5389.46  132.49
  -1   3   6 5329.27  131.79
   0  -3  -6 2524.25   63.99
   0  -3   6 2480.35   63.79
   0   3   6 2533.05   62.59
   0   3   6 2516.35   62.19
   0   3   6 2434.86   64.09
   1  -3   6 5252.67  131.59
  -1  -3  -6 5369.56  133.29
   1  -3   6 5164.78  129.99
   1   3   6 5586.54  132.19
   1   3   6 5499.35  129.99
   1   3   6 5367.56  131.09
   2  -3   6  189.68    8.00
   2  -3   6  193.48    8.70
   2   3   6  188.38    6.90
   2   3   6  196.48    8.20
   3  -3   6 1349.86   39.30
   3  -3   6 1397.26   36.00
  -3  -3  -6 1306.77   34.70
   3   3   6 1418.86   37.80
   3   3   6 1439.16   35.40
   3   3   6 1303.27   33.70
  -4  -3  -6   16.10    2.80
   4  -3   6    8.90    4.00
   4   3   6   12.10    2.30
   4   3   6   13.50    2.80
   4   3   6   17.20    2.60
  -5  -3  -6  299.47   10.30
   5  -3   6  301.67   17.70
   5   3   6  309.27    9.10
   5   3   6  325.77   10.90
  -6  -3  -6  249.28    9.30
   6   3   6  236.68   10.20
   6   3   6  257.67    9.90
   6   3   6  253.47    7.90
  -7  -3  -6  322.67   11.10
   7   3   6  302.37    9.40
   7   3   6  321.47   11.10
   7   3   6  279.27   11.50
  -8  -3  -6  341.57   11.90
   8  -3   6  336.97   11.70
   8   3   6  319.47   13.00
   8   3   6  335.97   10.20
   8   3   6  314.77   11.30
   9  -3   6  128.59    6.10
  -9  -3  -6  146.69    6.50
   9   3   6  137.99    5.20
   9   3   6  127.29    9.20
   9   3   6  138.59    7.00
 -10  -3  -6   72.69    4.30
  10  -3   6   71.19    4.10
  10   3   6   71.29    3.40
  10   3   6   73.69    4.30
 -11  -3  -6   59.89    5.10
  11  -3   6   55.99    3.10
 -11  -3  -6   48.50    4.50
  11   3   6   51.69    3.30
  11   3   6   48.10    2.80
 -11  -4   6   34.20    3.30
  11  -4  -6   26.20    3.60
  11  -4  -6   22.60    3.60
  11   4  -6   34.60    2.50
  10  -4  -6  417.76   12.90
 -10  -4   6  424.06   13.00
  10  -4  -6  418.66   12.10
  10   4  -6  417.86   12.20
   9  -4  -6  185.78    9.20
   9  -4  -6  157.58    6.50
  -9  -4   6  167.08    7.40
   9   4  -6  167.28    7.30
   9   4  -6  165.38    8.40
   8  -4  -6  400.76   13.00
  -8  -4   6  389.46   14.10
   8  -4  -6  399.96   14.10
   8   4  -6  400.36   12.80
  -8   4   6  397.86   16.30
   8   4  -6  400.46   13.30
  -7  -4   6   43.10    6.20
   7  -4  -6   51.19    4.90
  -7  -4   6   45.00    4.70
   7  -4  -6   50.49    6.90
   7   4  -6   55.19    6.30
   7   4  -6   49.90    5.10
  -7   4   6   32.00    5.90
  -6  -4   6  238.28    8.40
   6  -4  -6  232.18    8.70
  -6  -4   6  224.88   10.10
   6   4  -6  233.08    9.10
  -6   4   6  226.78   12.20
   6   4  -6  230.78    9.80
   6   4  -6  228.28    9.40
  -5  -4   6  560.54   16.00
   5  -4  -6  579.24   16.00
  -5  -4   6  562.54   17.60
   5   4  -6  533.25   16.50
   5   4  -6  551.54   17.10
   5   4  -6  528.45   16.80
  -5   4   6  581.24   19.00
  -4  -4   6  450.25   13.00
   4  -4  -6  443.86   12.70
  -4  -4   6  429.26   17.10
  -4  -4   6  431.96   14.40
  -4   4   6  393.86   16.40
  -4   4   6  425.06   15.40
  -3  -4   6   39.00    5.00
   3  -4  -6   43.90    3.80
  -3  -4   6   44.40    4.80
  -3  -4   6   40.20    7.00
  -3   4   6   51.49    6.90
  -3   4   6   40.10    5.20
  -2  -4   6  639.14   20.40
   2  -4  -6  608.94   16.40
  -2   4   6  573.24   18.30
  -2   4   6  611.34   18.80
  -1  -4   6  245.88   10.70
   1  -4  -6  253.67    8.10
  -1   4   6  233.38    9.90
  -1   4   6  225.48    9.20
  -1   4   6  214.68   10.30
   0  -4   6   86.69    6.50
   0   4   6   84.59    6.60
   0   4   6   83.99    5.60
   0   4   6   95.19    5.70
   1  -4   6  230.38    8.10
   1  -4   6  228.28    9.70
   1  -4   6  230.18    8.50
   1   4   6  229.58   10.00
   1   4   6  204.38    7.80
   1   4   6  233.68    8.60
   1   4   6  223.58    7.00
   2  -4   6  600.94   18.70
   2  -4   6  618.24   20.20
   2   4   6  585.94   16.00
   2   4   6  678.63   20.40
   3  -4   6   47.70    5.30
   3  -4   6   43.90    8.10
  -3  -4  -6   42.10    4.60
   3   4   6   38.00    5.00
   3   4   6   39.80    2.70
   3   4   6   42.10    3.20
   4  -4   6  437.36   20.40
  -4  -4  -6  450.55   13.50
   4   4   6  430.46   16.80
   4   4   6  450.55   13.90
  -5  -4  -6  575.24   16.50
   5   4   6  576.34   15.20
   5   4   6  519.75   17.20
   5   4   6  588.04   17.40
  -6  -4  -6  237.38    9.20
   6   4   6  239.18    9.80
   6   4   6  247.98    7.70
   6   4   6  229.98    9.70
  -7  -4  -6   47.80    5.10
   7   4   6   42.90    5.90
   7   4   6   43.50    3.50
  -8  -4  -6  396.96   13.40
   8  -4   6  382.76   13.50
   8   4   6  399.46   11.60
   8   4   6  401.76   12.80
   8   4   6  392.26   14.60
   9  -4   6  157.58    6.70
  -9  -4  -6  163.88    7.00
   9   4   6  170.38    5.80
   9   4   6  167.58    7.30
 -10  -4  -6  418.46   12.80
  10  -4   6  413.06   12.00
  10   4   6  420.76   11.50
  10   4   6  425.96   12.20
 -11  -4  -6   30.50    3.20
  11  -4   6   28.20    2.90
  11   4   6   26.30    2.50
  11   4   6   30.20    3.10
 -11  -5   6   48.70    3.60
  11   5  -6   56.49    2.90
 -10  -5   6  127.79    5.70
  10  -5  -6  135.09    6.00
  10   5  -6  135.59    5.10
  -9  -5   6   10.90    2.40
   9  -5  -6   11.20    2.10
   9   5  -6   12.00    3.10
  -9   5   6   11.00    3.70
   8  -5  -6   32.80    3.70
   8  -5  -6   22.80    4.50
  -8  -5   6   26.80    4.30
   8   5  -6   24.70    3.90
  -8   5   6   24.10    4.40
   8   5  -6   20.50    3.10
  -7  -5   6  463.65   15.30
  -7  -5   6  429.66   13.30
   7  -5  -6  451.05   15.10
   7  -5  -6  453.75   14.20
   7   5  -6  440.56   14.20
   7   5  -6  447.46   13.90
  -7   5   6  439.86   17.70
  -6  -5   6   79.29    6.80
  -6  -5   6   76.79    5.00
   6  -5  -6   74.59    5.30
   6   5  -6   63.89    8.30
  -6   5   6   94.99    9.50
   6   5  -6   77.09    6.80
   6   5  -6   66.39    6.00
  -5  -5   6  208.78    9.70
   5  -5  -6  218.48    8.30
  -5  -5   6  215.18    8.10
   5   5  -6  208.88    9.10
   5   5  -6  228.08    9.20
   5   5  -6  216.68    8.80
  -5   5   6  217.98   11.40
  -4  -5   6  585.34   18.10
  -4  -5   6  613.94   16.80
   4  -5  -6  577.14   16.50
   4   5  -6  586.64   17.50
   4   5  -6  586.14   17.40
  -4   5   6  572.64   19.50
   4   5  -6  580.14   17.70
  -4   5   6  580.24   21.90
  -3  -5   6    8.50    4.60
  -3  -5   6    6.90    2.50
   3  -5  -6    7.20    2.20
  -3   5   6    8.10    4.20
  -3   5   6    7.40    3.20
  -2  -5   6  372.66   15.20
  -2  -5   6  423.86   12.50
  -2  -5   6  406.96   16.20
   2  -5  -6  417.16   11.70
  -2   5   6  388.66   15.30
  -2   5   6  392.96   14.20
  -1  -5   6  193.98   10.40
   1  -5  -6  194.88    6.80
  -1   5   6  196.38    9.40
  -1   5   6  198.48    8.20
  -1   5   6  197.68    8.90
   0  -5   6 1271.87   35.90
   0  -5  -6 1255.97   31.70
   0   5   6 1305.77   35.10
   0   5   6 1251.27   33.10
   0   5   6 1255.27   32.00
  -1  -5  -6  198.08    6.80
   1  -5   6  196.58    9.90
   1   5   6  205.28    7.80
   1   5   6  201.98    6.80
   1   5   6  205.18    8.30
   1   5   6  200.38   11.00
   2  -5   6  429.66   14.80
   2  -5   6  428.26   17.30
  -2  -5  -6  406.36   13.00
  -2  -5  -6  392.26   11.80
   2   5   6  419.16   12.40
   2   5   6  413.36   11.50
   2   5   6  400.76   16.30
   2   5   6  435.86   13.60
  -3  -5  -6    3.80    3.00
   3  -5   6    9.70    6.00
   3   5   6    8.00    3.70
   3   5   6    8.60    1.80
  -4  -5  -6  563.64   18.00
  -4  -5  -6  537.65   18.40
   4   5   6  597.54   17.70
   4   5   6  582.64   17.90
   4   5   6  577.34   15.20
  -5  -5  -6  209.88    8.50
  -5  -5  -6  212.48   11.50
   5   5   6  215.48    7.00
   5   5   6  215.58    9.60
   5   5   6  224.68    9.10
  -6  -5  -6   79.49    5.80
   6   5   6   79.19    5.80
   6   5   6   77.59    4.00
   6   5   6   80.69    6.60
  -7  -5  -6  447.56   14.50
   7   5   6  454.55   15.90
   7   5   6  449.16   12.80
   7   5   6  449.26   14.10
  -8  -5  -6   24.60    3.80
   8  -5   6   37.60    5.70
   8   5   6   22.00    4.30
   8   5   6   29.60    2.50
   8   5   6   24.20    3.50
  -9  -5  -6   11.30    2.10
   9  -5   6   14.30    2.80
   9   5   6   10.20    1.40
   9   5   6   10.80    2.30
 -10  -5  -6  122.29    5.40
  10   5   6  127.59    5.10
 -11  -5  -6   51.79    3.60
 -11  -5  -6   62.89    5.10
  11  -5   6   59.59    5.40
  11   5   6   57.99    3.40
  10  -6  -6   37.10    4.00
 -10  -6   6   46.40    3.60
  10   6  -6   43.80    2.90
  -9  -6   6   12.20    2.40
   9  -6  -6   13.90    2.80
   9  -6  -6   16.80    2.20
   9   6  -6   18.20    2.20
  -9   6   6   19.30    3.70
  -8  -6   6  259.07    9.60
   8  -6  -6  273.17   10.90
   8  -6  -6  270.17    9.10
   8   6  -6  270.77    9.50
   8   6  -6  265.57   10.00
  -8   6   6  247.98   11.50
   7  -6  -6  137.29    7.80
   7  -6  -6  144.79    7.80
   7   6  -6  125.59    6.80
   7   6  -6  136.19    7.20
  -7   6   6  129.89   17.20
  -6  -6   6  532.25   17.00
   6  -6  -6  535.35   16.10
  -6  -6   6  525.05   15.30
   6   6  -6  538.95   16.20
  -6   6   6  515.45   20.00
   6   6  -6  528.65   16.00
   6   6  -6  534.15   16.00
  -5  -6   6   16.80    2.70
  -5  -6   6   19.30    4.00
   5  -6  -6   16.90    2.90
   5   6  -6   26.50    4.70
   5   6  -6   15.00    3.20
   5   6  -6   21.40    5.50
  -5   6   6   14.00    4.80
  -4  -6   6 1047.50   28.90
  -4  -6   6 1027.30   27.40
   4  -6  -6 1059.89   27.50
  -4   6   6  999.90   30.80
   4   6  -6 1043.40   28.00
   4   6  -6 1071.49   28.40
   4   6  -6 1041.90   27.80
  -3  -6   6  321.27   10.30
  -3  -6   6  319.67   13.20
   3  -6  -6  327.97   10.10
   3  -6  -6  296.37   15.70
   3   6  -6  314.47   10.90
  -3   6   6  285.67   15.50
  -3   6   6  321.97   13.40
   3   6  -6  310.77   11.60
   3   6  -6  312.47   11.70
  -3   6   6  319.17   15.30
   2  -6  -6  580.14   15.70
  -2  -6   6  565.24   16.10
   2  -6  -6  555.44   18.80
   2   6  -6  528.55   17.10
   2   6  -6  552.64   16.50
  -2   6   6  583.44   21.00
  -2   6   6  573.74   18.60
   2   6  -6  562.14   17.60
   1  -6  -6  224.88   11.50
  -1  -6   6  240.18    9.10
   1  -6  -6  241.58    7.80
   1   6  -6  218.48    9.20
  -1   6   6  227.98   10.20
  -1   6   6  239.48   11.40
   0  -6  -6  322.57   12.60
   0  -6  -6  347.97   10.00
   0  -6   6  326.87   14.80
   0   6  -6  338.27   11.40
   0   6   6  330.37   11.90
   0   6   6  321.97   13.20
   0   6   6  324.77   11.30
  -1  -6  -6  217.98   10.10
   1  -6   6  222.68   12.70
  -1  -6  -6  241.58    7.60
   1   6   6  231.48    8.00
   1   6   6  224.58    9.00
  -1   6  -6  228.48    9.70
   1   6   6  250.87   10.40
  -2  -6  -6  544.25   16.70
  -2  -6  -6  552.14   14.80
  -2  -6  -6  546.15   19.30
   2   6   6  464.65   16.60
   2   6   6  566.14   14.90
   2   6   6  571.04   17.80
  -2   6  -6  545.75   18.90
  -3  -6  -6  315.67   11.10
  -3  -6  -6  307.97   11.50
   3   6   6  313.37   11.70
   3   6   6  322.57    9.40
   3   6   6  305.47   10.30
   3   6   6  304.97   11.80
  -3   6  -6  282.67   14.10
  -4  -6  -6 1044.60   27.80
  -4  -6  -6 1014.80   28.10
  -4   6  -6 1048.00   29.90
   4   6   6 1027.10   27.30
   4   6   6 1044.40   29.60
   4   6   6  988.30   27.60
   4   6   6 1041.10   26.30
  -5  -6  -6   13.50    3.30
  -5  -6  -6   13.20    4.60
   5   6   6   17.20    2.90
   5   6   6   22.50    3.00
   5   6   6   14.30    2.80
   5   6   6   15.00    3.60
  -6  -6  -6  521.75   15.90
   6   6   6  502.85   15.60
   6   6   6  520.85   17.80
   7   6   6  128.99    6.80
   7   6   6  124.79    9.10
  -8  -6  -6  255.67    9.20
   8  -6   6  245.68    9.50
   8   6   6  269.47    8.70
   8   6   6  249.88    9.30
   8   6   6  260.97    7.80
   9  -6   6   16.40    3.10
  -9  -6  -6   13.90    2.40
   9   6   6   15.30    2.30
   9   6   6   14.30    2.00
   9   6   6   16.80    2.30
 -10  -6  -6   33.40    3.60
  10  -6   6   38.80    4.00
  10   6   6   38.80    4.60
  10   6   6   50.99    3.30
   9  -7  -6   14.40    2.50
   9  -7  -6   14.40    2.50
  -9  -7   6   14.70    2.50
   9   7  -6   14.50    1.80
   8  -7  -6    3.70    2.10
  -8  -7   6    1.20    2.50
   8  -7  -6    3.40    2.60
  -8   7   6    8.20    3.70
   8   7  -6    4.00    2.60
   8   7  -6   -1.30    1.80
  -7  -7   6   87.19    4.30
  -7  -7   6   79.79    5.60
   7  -7  -6   83.09    6.80
   7  -7  -6   86.99    4.90
   7   7  -6   88.09    5.90
  -7   7   6   77.49    7.80
   7   7  -6   91.49    5.70
   6  -7  -6  108.39    6.90
  -6  -7   6  108.89    5.90
   6   7  -6  116.19    6.40
  -6   7   6  105.69   12.50
   6   7  -6  111.29    6.40
  -5  -7   6  312.67   10.30
  -5  -7   6  296.27   12.40
   5  -7  -6  320.67   10.90
   5   7  -6  300.67   10.80
  -5   7   6  315.07   14.90
   5   7  -6  309.77   11.10
   5   7  -6  316.37   11.10
  -4  -7   6  603.54   17.20
   4  -7  -6  596.24   17.30
   4   7  -6  629.34   18.30
  -4   7   6  606.54   21.40
   4   7  -6  596.14   17.90
   4   7  -6  600.64   17.60
   3  -7  -6  299.27   14.60
  -3  -7   6  287.87   10.10
   3  -7  -6  320.27   10.20
   3   7  -6  309.37   11.20
   3   7  -6  314.47   11.40
   3   7  -6  309.97   10.80
  -3   7   6  314.17   14.00
  -3   7   6  303.07   16.40
  -3   7   6  301.37   14.40
   2  -7  -6  160.68   10.20
   2  -7  -6  158.88    6.50
  -2  -7   6  162.88    6.90
  -2   7   6  160.88    9.70
   2   7  -6  169.18    7.40
  -2   7   6  157.38   11.40
   2   7  -6  161.28    8.50
  -2   7   6  171.68   11.60
   2   7  -6  162.48    8.60
   1  -7  -6  304.87   12.20
  -1  -7   6  300.47   10.00
   1  -7  -6  302.67    9.50
   1   7  -6  301.67   10.40
  -1   7   6  299.87   13.80
  -1   7   6  306.57   14.40
  -1   7   6  289.77   12.50
   1   7  -6  300.77   11.80
   1   7  -6  291.87   11.70
   0  -7   6 1478.45   38.10
   0  -7  -6 1523.15   37.70
   0  -7  -6 1527.35   39.30
   0   7   6 1500.05   40.10
   0   7   6 1536.65   43.70
   0   7   6 1481.05   40.00
   0   7  -6 1456.05   39.50
   0   7  -6 1528.65   38.50
   0   7  -6 1452.05   39.60
  -1  -7  -6  297.57   11.40
  -1  -7  -6  299.47    9.30
  -1   7  -6  300.77   12.90
   1   7   6  294.57   13.10
   1   7   6  285.77   12.60
   1   7   6  303.27   11.40
  -2  -7  -6  163.98    8.30
  -2  -7  -6  156.78    6.40
   2   7   6  152.58    7.70
   2   7   6  143.09    9.00
   2   7   6  157.68    9.10
  -2   7  -6  150.98   10.40
  -3  -7  -6  305.07   11.50
  -3   7  -6  306.77   13.70
   3   7   6  292.77    9.70
   3   7   6  289.77   12.70
   3   7   6  308.57   10.90
   3   7   6  305.87   11.50
  -4  -7  -6  558.74   17.50
  -4  -7  -6  572.74   17.70
   4   7   6  590.64   17.30
   4   7   6  591.44   19.90
  -4   7  -6  596.64   19.80
   4   7   6  561.34   15.90
   4   7   6  585.54   17.50
  -5  -7  -6  310.87   11.30
  -5  -7  -6  304.37   11.90
   5   7   6  315.97   13.90
   5   7   6  313.77    9.90
   5   7   6  316.87   11.10
   5   7   6  316.47   11.20
  -6  -7  -6  104.69    8.20
   6   7   6  106.19    6.50
   6   7   6   96.19   10.50
  -7  -7  -6   89.49    5.20
   7   7   6   83.29    5.80
   7   7   6   80.69    5.00
   7   7   6   81.59    4.40
   8  -7   6   -2.90    3.40
  -8  -7  -6    4.40    2.40
   8   7   6    2.00    2.10
   8   7   6   -3.40    2.50
  -9  -7  -6   13.80    2.60
   9  -7   6   15.10    3.20
   9   7   6    6.80    3.30
   9   7   6   18.20    2.10
   9  -8  -6  210.18    6.80
   9  -8  -6  219.88    7.20
   8  -8  -6  181.38    6.40
   8  -8  -6  182.38    6.90
   8   8  -6  180.18    6.20
  -8   8   6  175.18    8.60
   7  -8  -6  241.98    8.60
   7  -8  -6  233.98    8.10
  -7  -8   6  233.08    7.40
   7   8  -6  231.28    8.00
  -7   8   6  223.18   10.40
   7   8  -6  230.68    7.70
   6  -8  -6  275.17    9.40
  -6  -8   6  294.07    8.90
   6   8  -6  289.57   10.20
  -6   8   6  263.77   12.40
   6   8  -6  287.17    9.90
   5  -8  -6   36.30    3.70
  -5  -8   6   37.50    3.30
  -5   8   6   37.90    5.00
   5   8  -6   39.20    4.90
   5   8  -6   48.60    5.00
   4  -8  -6  260.87    9.50
  -4  -8   6  267.97    9.20
  -4   8   6  255.87   13.70
   4   8  -6  265.77    9.90
   4   8  -6  255.67    9.60
   4   8  -6  255.07   10.10
   3  -8  -6  235.88    8.70
   3  -8  -6  228.78   12.70
  -3  -8   6  231.08    8.60
  -3   8   6  247.38   12.80
   3   8  -6  243.28    9.90
  -3   8   6  241.48   12.20
   3   8  -6  234.38    9.40
  -3   8   6  240.28   16.10
   3   8  -6  232.18    9.00
  -2  -8   6    0.50    2.20
   2  -8  -6    5.40    2.30
   2  -8  -6   11.50    4.80
   2   8  -6    1.20    3.40
  -2   8   6    0.30    4.00
   2   8  -6    0.70    2.60
  -2   8   6   -6.80    5.30
  -2   8   6    0.20    4.80
   2   8  -6   -1.30    3.30
   1  -8  -6 3723.03   89.19
  -1  -8   6 3602.04   89.19
   1  -8  -6 3646.14   90.69
   1   8  -6 3648.33   89.69
  -1   8   6 3721.63   92.69
  -1   8   6 3793.72   98.99
  -1   8   6 3730.63   91.59
   1   8  -6 3676.63   90.79
   1   8  -6 3380.66   91.29
   0  -8  -6  411.86   14.00
   0  -8   6  398.36   12.10
   0  -8  -6  389.66   11.80
   0   8   6  383.66   17.60
   0   8   6  387.96   14.90
   0   8  -6  370.76   15.30
   0   8   6  386.76   20.30
  -1  -8  -6 3655.13   90.79
  -1  -8  -6 3724.93   89.19
   1  -8   6 3608.74   89.29
   1   8   6 3655.43   91.09
   1   8   6 3685.53   91.89
   1   8   6 3701.73   96.39
  -1   8  -6 3663.43   91.69
  -2  -8  -6   -0.30    2.50
  -2  -8  -6    3.20    3.20
   2  -8   6   -0.40    3.00
   2   8   6   -1.40    3.80
   2   8   6    5.30    5.60
   2   8   6    3.30    3.50
  -2   8  -6    0.70    4.70
  -3  -8  -6  237.88    9.70
  -3   8  -6  248.18   12.00
   3   8   6  221.88    9.90
   3   8   6  220.98    9.90
   3   8   6  217.18   13.00
  -4  -8  -6  262.97   10.60
   4   8   6  237.98   14.40
   4   8   6  262.27   10.30
   4   8   6  256.67   10.70
  -5  -8  -6   41.20    6.10
   5   8   6   37.60    5.50
   5   8   6   43.70    4.80
   5   8   6   38.90    7.60
  -6  -8  -6  289.27   10.30
  -6  -8  -6  285.07   11.40
   6   8   6  284.97   10.30
   6   8   6  279.87   10.00
   7  -8   6  254.27   11.00
  -7  -8  -6  228.18    8.70
   7   8   6  240.48    8.20
   7   8   6  231.28    8.80
  -8  -8  -6  171.48    7.10
   8  -8   6  181.68    7.60
   8   8   6  175.28    6.30
   9   8   6  207.08    6.70
   8  -9  -6   79.09    4.30
   8  -9  -6   92.19    4.20
  -8   9   6   94.19    5.80
   7  -9  -6   15.60    2.10
   7  -9  -6   15.00    2.20
  -7   9   6   12.60    3.60
   7   9  -6   15.70    2.00
   6  -9  -6  376.56   11.30
  -6  -9   6  385.66   10.60
   6   9  -6  360.96   11.40
  -6   9   6  372.26   13.90
   5  -9  -6   40.30    3.60
  -5  -9   6   38.80    3.00
  -5   9   6   34.00    4.70
   5   9  -6   39.20    5.00
  -4  -9   6   53.09    3.50
   4  -9  -6   52.29    3.90
  -4   9   6   53.29    7.00
   4   9  -6   54.19    5.50
   3  -9  -6  558.34   19.00
  -3  -9   6  556.34   15.80
   3  -9  -6  561.44   16.00
  -3   9   6  578.54   19.40
  -3   9   6  543.65   18.90
   3   9  -6  573.44   17.50
  -2  -9   6  687.93   18.50
   2  -9  -6  708.93   18.80
   2  -9  -6  651.73   20.50
   2   9  -6  665.93   20.00
   2   9  -6  659.93   18.90
  -2   9   6  591.74   27.00
  -2   9   6  659.03   22.90
  -2   9   6  663.83   21.20
  -1  -9   6  133.69    6.20
   1  -9  -6  142.59    6.40
   1  -9  -6  137.69    8.50
  -1   9   6  112.99    9.90
  -1   9   6  133.19   14.10
  -1   9   6  129.69    9.30
   1   9  -6  140.69    8.50
   0  -9  -6  126.69    5.90
   0  -9  -6  125.39    7.80
   0  -9   6  132.09    6.10
   0   9   6  101.19    8.40
   0   9   6  102.69   12.70
   0   9   6  121.19    9.40
   0   9  -6  117.39    8.60
   1  -9   6  127.79    6.20
  -1  -9  -6  122.79    6.20
  -1  -9  -6  123.89    7.80
  -1   9  -6  122.09    9.10
   1   9   6  137.09    9.50
   1   9   6  136.39    8.50
   1   9   6  106.59   13.30
   2  -9   6  640.04   19.10
  -2  -9  -6  540.95   20.60
  -2  -9  -6  686.23   19.80
   2   9   6  648.44   25.70
   2   9   6  675.43   22.30
  -2   9  -6  673.43   21.00
   2   9   6  651.93   19.70
   3  -9   6  534.15   14.80
  -3  -9  -6  555.24   17.00
   3   9   6  548.65   17.10
   3   9   6  488.65   23.50
  -3   9  -6  555.84   18.60
   3   9   6  540.15   16.90
  -4  -9  -6   56.19    6.10
   4  -9   6   48.70    4.50
   4   9   6   42.20    5.80
   4   9   6   56.39    6.10
   5  -9   6   43.90    4.80
  -5  -9  -6   52.89    8.30
   5   9   6   45.40    6.00
   5   9   6   44.20    6.60
   6  -9   6  366.86   11.60
  -6  -9  -6  388.86   11.90
   6   9   6  376.46   11.50
   6   9   6  358.36   12.50
   7  -9   6   17.50    3.60
   7   9   6   16.80    2.30
  -8  -9  -6   99.79    5.70
   8   9   6   76.19    4.50
   6 -10  -6  219.58    7.10
   6 -10  -6  218.98    7.30
  -6 -10   6  206.48    6.60
   6  10  -6  217.88    7.20
  -6  10   6  215.88    9.20
   5 -10  -6  117.39    5.00
  -5 -10   6  113.99    4.40
  -5  10   6  107.19    7.60
   5  10  -6  110.29    5.20
  -4 -10   6   26.20    2.60
   4 -10  -6   22.90    3.30
   4  10  -6   35.90    3.80
  -4  10   6   28.10    4.30
   3 -10  -6    2.00    1.90
  -3 -10   6    4.30    1.60
   3 -10  -6    6.70    4.70
  -3  10   6   -0.90    3.90
   3  10  -6    4.80    3.00
   2 -10  -6  211.48    7.40
  -2 -10   6  215.48    7.20
   2 -10  -6  212.68   11.60
   2  10  -6  212.58    9.60
  -2  10   6  209.78   10.70
  -2  10   6  211.48   10.10
  -1 -10   6   33.50    3.00
   1 -10  -6   37.80    4.90
   1 -10  -6   33.20    3.50
  -1  10   6   48.10    7.30
   1  10  -6   39.20    5.10
  -1  10   6   32.30    4.50
   0 -10  -6  204.78    9.20
   0 -10   6  197.88    6.70
   0 -10  -6  193.18    7.00
   0  10  -6  198.98   10.00
   0  10   6  192.98   10.00
   0  10   6  193.48    9.50
  -1 -10  -6   39.70    4.80
  -1 -10  -6   47.60    4.20
   1 -10   6   40.70    3.30
   1  10   6   30.10    4.50
   1  10   6   45.90    6.80
  -1  10  -6   39.20    5.40
   2 -10   6  198.98    7.00
  -2 -10  -6  219.18    9.40
  -2  10  -6  217.38   10.80
   2  10   6  203.88    9.70
   2  10   6  216.58    9.90
  -3 -10  -6    0.70    3.40
   3 -10   6    1.80    1.90
   3  10   6   -2.40    4.40
   3  10   6   -2.70    2.70
  -3  10  -6   -1.00    3.50
   4 -10   6   24.10    3.70
  -4 -10  -6   27.40    3.80
   4  10   6   26.40    4.90
   4  10   6   26.30    3.10
   5 -10   6  104.89    5.30
  -5 -10  -6  107.29    5.40
   5  10   6  111.29    5.50
  -6 -10  -6  220.08    7.80
  -6 -10  -6  222.88    8.20
   6 -10   6  191.38    7.60
   6  10   6  220.88    7.40
  -5 -11   6  239.58    7.20
   5 -11  -6  221.88    7.30
  -5 -11   6  219.78    6.90
   5 -11  -6  234.38    7.20
   5  11  -6  243.18   10.00
  -5  11   6  216.28    9.40
   4 -11  -6   41.20    3.90
  -4 -11   6   36.60    2.70
  -4  11   6   40.70    4.50
   4  11  -6   33.40    3.50
  -3 -11   6   11.00    1.50
   3 -11  -6   13.10    2.60
   3  11  -6   11.20    2.40
  -3  11   6   17.50    4.40
  -2 -11   6    4.20    1.40
   2 -11  -6    5.90    2.30
   2 -11  -6    4.70    3.40
   2  11  -6    4.60    2.40
  -2  11   6    3.00    4.40
   1 -11  -6    4.10    2.80
  -1 -11   6    6.30    1.40
   1 -11  -6    9.80    2.50
   1  11  -6    3.50    2.50
  -1  11   6    6.20    3.00
  -1  11   6   16.30    4.80
   0 -11  -6  171.18    7.20
   0 -11   6  166.38    5.70
   0  11  -6  167.38    7.30
   0  11   6  159.98    9.40
   0  11   6  170.28    7.50
   1 -11   6    7.70    1.60
   1 -11   6    5.50    2.50
  -1 -11  -6    4.60    2.30
   1  11   6    8.50    2.90
  -1  11  -6    3.80    2.80
  -2 -11  -6   11.50    2.40
   2 -11   6    8.80    1.70
  -2  11  -6    3.60    2.90
   2  11   6    4.90    2.90
   2  11   6   12.10    6.30
   3 -11   6   11.20    1.90
  -3 -11  -6    9.40    2.20
   3  11   6   11.10    2.70
   4 -11   6   36.60    3.50
  -4 -11  -6   36.40    3.60
   4  11   6   39.50    4.20
  -5 -11  -6  225.18    8.10
   5  11   6  219.78    7.60
  -2 -12   6    7.40    1.40
  -2 -12   6    6.40    1.60
   2  12  -6    5.50    2.30
  -1 -12   6   73.19    3.30
  -1 -12   6   69.79    3.60
   1 -12  -6   78.09    5.10
   1  12  -6   81.89    4.50
   0 -12   6    1.80    1.40
   0 -12  -6    2.60    2.30
   0 -12   6   -3.50    2.10
   0  12  -6   -0.40    2.50
  -1 -12  -6   78.69    4.50
   1 -12   6   75.49    3.40
   1  12   6   65.69    5.10
  -2 -12  -6    5.70    2.10
   2 -12   6    5.60    1.70
   2  12   6    6.20    2.90
  11   0  -7  940.21   23.90
 -11   0   7  907.61   24.50
  10   0  -7  213.78    8.50
 -10   0   7  232.18    8.70
   9   0  -7  553.24   18.40
   9   0  -7  632.24   18.40
  -8   0   7    1.00    3.50
   8   0  -7   -0.30    2.30
   8   0  -7    3.10    3.80
   7   0  -7 1254.57   33.80
  -7   0   7 1270.87   34.50
   7   0  -7 1241.78   31.90
  -6   0   7   71.49    8.60
   6   0  -7   86.79    4.90
   6   0  -7   90.19    8.20
  -6   0   7   72.29    6.00
  -5   0   7 1321.27   36.50
  -5   0   7 1298.67   34.70
  -5   0   7 1273.57   33.10
   5   0  -7 1255.17   32.30
   4   0  -7   16.70    3.70
  -4   0   7   27.50    5.30
  -4   0   7   24.80    3.30
  -3   0   7  534.25   17.30
   3   0  -7  546.05   16.10
  -2   0   7 2969.90   75.19
   2   0  -7 3042.80   75.09
  -2   0   7 3182.48   77.39
   1   0  -7 3015.50   74.49
  -1   0   7 3076.99   74.09
   0   0  -7    1.70    1.40
   0   0   7    0.30    0.70
   0   0   7    0.50    0.90
   1   0   7 2950.80   73.29
   1   0   7 3061.89   72.19
  -1   0  -7 2933.81   75.39
  -2   0  -7 2997.70   79.19
   2   0   7 3095.79   76.09
   2   0   7 3083.59   74.49
   3   0   7  569.94   18.00
   3   0   7  562.14   16.00
   4   0   7   19.20    3.50
  -4   0  -7   21.80    3.20
   4   0   7   23.40    5.00
   4   0   7   22.80    3.50
  -5   0  -7 1331.27   34.70
   5   0   7 1380.36   40.80
  -6   0  -7   82.99    6.70
   6   0   7   74.99    5.70
   6   0   7   79.79    5.40
   7   0   7 1216.38   31.50
  -7   0  -7 1244.58   32.60
   7   0   7 1245.38   35.10
   8   0   7    0.70    2.20
  -8   0  -7   -1.50    4.80
   8   0   7   -0.50    3.30
  -8   0  -7    3.00    2.80
  -9   0  -7  671.73   20.70
  -9   0  -7  630.84   21.50
   9   0   7  631.84   21.90
  10   0   7  226.78    7.20
  10   0   7  205.88    8.00
 -10   0  -7  221.58    8.20
  11   0   7  905.31   23.40
  11   0   7  933.71   23.10
 -11   0  -7  882.91   24.10
  11  -1  -7   81.09    5.20
  11  -1  -7   76.29    3.80
 -11  -1   7   65.29    5.30
  11   1  -7   75.29    3.80
  10  -1  -7  149.59    6.90
 -10  -1   7  144.39    6.80
  10  -1  -7  149.69    5.70
  10   1  -7  149.99    6.70
 -10   1   7  145.29    7.20
   9  -1  -7  142.89    5.90
   9  -1  -7  144.09    8.60
  -9  -1   7  164.08    7.90
  -9   1   7  156.48    7.50
   9   1  -7  155.08    8.40
  -8  -1   7  318.17   12.60
   8  -1  -7  315.17   10.40
   8  -1  -7  316.57   12.30
  -8   1   7  328.47   13.00
   8   1  -7  321.07   12.10
   7  -1  -7  118.69    5.80
  -7  -1   7  116.69    7.70
   7  -1  -7  107.89    8.00
  -7   1   7  113.89   10.50
  -7   1   7  117.99    8.50
   7   1  -7  121.79    5.50
   7   1  -7  110.69    8.10
  -6  -1   7  216.88    9.70
   6  -1  -7  217.78   10.00
  -6  -1   7  223.28    8.30
   6   1  -7  222.08   10.10
  -6   1   7  202.78    9.80
  -6   1   7  172.38   11.70
  -6   1   7  205.68   12.50
  -5  -1   7  592.54   21.00
   5  -1  -7  623.04   16.80
  -5  -1   7  641.24   17.40
  -5  -1   7  651.33   19.10
  -5   1   7  617.64   19.00
   5   1  -7  594.94   16.50
  -5   1   7  609.04   20.60
  -5   1   7  604.94   17.40
  -4  -1   7 1888.11   48.40
  -4  -1   7 2025.10   52.39
   4  -1  -7 1827.62   47.80
   4  -1  -7 2033.00   53.19
  -4   1   7 1915.11   48.40
  -4   1   7 1961.90   51.19
  -3  -1   7  287.57   11.90
   3  -1  -7  277.97   10.80
  -3   1   7  278.47   10.80
  -3   1   7  273.07   10.60
  -2  -1   7 5956.70  146.99
   2  -1  -7 6062.59  145.39
  -2   1   7 5806.82  145.09
   2   1  -7 6126.49  143.39
  -1  -1   7 3713.53   89.19
  -1  -1   7 3702.63   92.49
   1  -1  -7 3775.92   91.09
  -1   1   7 3633.74   90.29
   1   1  -7 3718.83   89.59
   0  -1   7 1402.26   34.70
   0  -1   7 1481.75   37.60
   0  -1  -7 1397.76   36.70
   0  -1   7 1391.86   34.10
   0   1   7 1357.96   36.20
   0   1  -7 1333.57   35.80
   0   1   7 1396.96   35.00
   1  -1   7 3769.82   89.59
  -1  -1  -7 3680.73   93.39
   1  -1   7 3664.93   90.49
   1   1   7 3753.52   91.49
   1   1   7 3747.73   90.09
   2  -1   7 5957.10  142.29
   2  -1   7 5661.13  140.29
  -2  -1  -7 5776.52  145.89
   2   1   7 5903.41  142.39
   2   1   7 5908.41  140.59
   3  -1   7  276.57   11.10
   3   1   7  294.77   10.90
   3   1   7  281.97    9.20
   3   1   7  274.07   11.00
   4  -1   7 2040.10   54.59
  -4  -1  -7 2015.80   49.50
   4  -1   7 2008.20   50.69
  -4   1  -7 1900.71   49.50
   4   1   7 1985.60   53.49
   4   1   7 1981.50   51.39
  -5  -1  -7  637.94   17.80
   5  -1   7  637.84   23.80
   5   1   7  644.24   22.50
   5   1   7  597.04   16.90
   5   1   7  665.73   19.10
  -5   1  -7  628.04   17.90
  -6  -1  -7  228.48    8.60
   6   1   7  233.98    7.80
   6   1   7  228.68    9.60
  -6   1  -7  215.38   12.50
  -6   1  -7  235.78    8.90
  -7  -1  -7  122.49    6.60
   7  -1   7  124.49    7.10
   7   1   7  119.39    5.50
  -7   1  -7  128.49    6.90
  -7   1  -7  128.69   10.70
   7   1   7  114.49    7.20
   8  -1   7  275.87   12.90
   8  -1   7  325.07   10.50
  -8  -1  -7  319.57   11.20
   8   1   7  323.27   10.00
  -8   1  -7  313.37   14.80
  -8   1  -7  329.57   11.70
   8   1   7  317.47   13.00
   9  -1   7  137.99   10.40
   9  -1   7  154.78    6.00
  -9  -1  -7  151.38    7.00
  -9  -1  -7  149.99    9.20
   9   1   7  146.89    6.70
   9   1   7  145.09    7.60
  -9   1  -7  149.99    7.00
   9   1   7  137.59    9.60
 -10  -1  -7  144.79    7.80
  10  -1   7  151.38    5.60
 -10  -1  -7  157.78    6.40
  10   1   7  151.38    5.40
  10   1   7  144.59    6.20
 -11  -1  -7   62.39    5.40
  11  -1   7   78.09    3.50
  11  -1   7   69.29    3.90
  11   1   7   66.59    3.90
  11   1   7   72.49    3.30
  11  -2  -7   22.20    3.20
 -11  -2   7   23.00    3.10
  11   2  -7   18.10    2.70
  10  -2  -7   35.40    3.50
 -10  -2   7   46.40    4.20
  10  -2  -7   37.40    5.00
  10   2  -7   40.70    3.60
  10   2  -7   41.40    4.70
   9  -2  -7  487.25   16.00
  -9  -2   7  497.05   15.70
   9  -2  -7  488.35   14.00
   9   2  -7  480.35   15.40
   9   2  -7  512.85   15.00
   8  -2  -7  723.13   21.60
   8  -2  -7  736.53   20.10
  -8  -2   7  734.13   22.20
  -8   2   7  744.33   22.20
   8   2  -7  709.83   21.10
   8   2  -7  688.33   20.40
  -8   2   7  736.53   23.50
   7  -2  -7  865.51   25.10
   7  -2  -7  885.71   23.70
  -7  -2   7  895.31   25.70
  -7  -2   7  891.81   23.60
  -7   2   7  857.11   26.60
  -7   2   7  884.91   25.70
   7   2  -7  866.51   24.40
   7   2  -7  882.61   24.90
  -6  -2   7  476.45   16.00
  -6  -2   7  491.65   14.40
   6  -2  -7  460.55   15.60
   6  -2  -7  501.55   14.20
   6   2  -7  466.65   15.80
   6   2  -7  480.55   15.60
  -6   2   7  491.75   17.90
  -6   2   7  483.75   16.90
  -5  -2   7  724.63   24.50
  -5  -2   7  710.63   21.40
   5  -2  -7  741.13   19.70
  -5  -2   7  736.53   20.10
  -5   2   7  727.63   21.80
  -5   2   7  719.43   20.30
  -5   2   7  745.03   22.80
  -4  -2   7  876.81   26.70
  -4  -2   7  867.51   24.30
   4  -2  -7  842.32   22.30
  -4  -2   7  835.12   22.70
  -4   2   7  825.22   25.00
  -4   2   7  879.91   25.20
  -4   2   7  837.72   22.90
  -3  -2   7  139.79    8.30
  -3  -2   7  137.89    6.70
  -3   2   7  137.89    7.90
  -3   2   7  133.19    7.20
  -3   2   7  144.49    7.00
   2  -2  -7 1815.12   47.60
  -2  -2   7 1917.51   49.00
  -2   2   7 1742.13   47.10
   1  -2  -7 5612.54  138.19
  -1  -2   7 5933.21  139.59
  -1   2   7 5436.86  137.19
   0  -2  -7   44.90    4.70
   0  -2   7   42.30    4.30
   0   2   7   39.70    3.10
   0   2   7   39.10    3.60
   1  -2   7 5697.23  138.59
  -1  -2  -7 5729.13  142.39
   1  -2   7 5790.12  137.69
   1  -2   7 5765.02  141.09
   1   2   7 5875.81  138.69
   1   2   7 5685.23  140.49
   2  -2   7 1792.72   45.90
   2  -2   7 1757.82   45.40
  -2  -2  -7 1690.13   49.60
   2   2   7 1699.03   45.50
   2   2   7 1813.92   44.00
  -3  -2  -7  142.59    6.40
   3  -2   7  141.19    8.00
   3  -2   7  138.69    7.20
   3   2   7  151.48    7.50
   3   2   7  149.59    6.10
   4  -2   7  863.61   28.30
   4  -2   7  907.51   24.90
  -4  -2  -7  849.61   23.10
   4   2   7  841.22   23.70
   4   2   7  872.31   26.70
   4   2   7  871.71   22.10
  -5  -2  -7  758.72   20.50
   5  -2   7  726.63   27.40
   5   2   7  750.22   19.30
   5   2   7  757.72   21.50
  -5   2  -7  715.43   20.50
  -6  -2  -7  490.65   14.90
  -6   2  -7  476.55   19.10
  -6   2  -7  486.75   15.00
   6   2   7  489.85   13.60
   6   2   7  506.65   16.10
  -7  -2  -7  908.51   25.10
   7   2   7  921.31   23.70
   7   2   7  878.91   25.00
   7   2   7  921.41   26.80
   8  -2   7  743.03   20.80
  -8  -2  -7  754.32   21.50
   8   2   7  746.03   21.10
   8   2   7  754.12   23.60
   8   2   7  747.83   20.10
   9  -2   7  503.65   14.20
  -9  -2  -7  496.95   15.20
   9  -2   7  459.65   18.60
   9   2   7  487.35   13.80
   9   2   7  521.75   15.20
   9   2   7  489.45   17.80
 -10  -2  -7   43.60    5.10
  10  -2   7   46.40    3.40
 -10  -2  -7   42.90    3.90
  10   2   7   32.90    2.80
  10   2   7   47.90    3.90
 -11  -2  -7   16.00    3.60
 -11  -2  -7   18.10    3.50
  11   2   7   22.10    3.00
  11   2   7   18.60    2.20
 -11  -3   7   61.39    3.90
  11   3  -7   57.59    3.20
  10  -3  -7   68.79    4.00
  10  -3  -7   75.49    5.10
 -10  -3   7   80.19    4.70
  10   3  -7   63.29    5.00
  10   3  -7   68.59    3.90
   9  -3  -7  334.87   12.30
  -9  -3   7  320.97   11.40
   9  -3  -7  328.97   10.20
   9   3  -7  330.47   11.50
   9   3  -7  313.67   10.90
   8  -3  -7  432.76   13.40
  -8  -3   7  429.16   15.10
   8  -3  -7  437.66   14.80
  -8   3   7  423.86   16.90
   8   3  -7  416.96   13.60
   8   3  -7  416.66   13.90
  -7  -3   7   18.80    4.20
  -7  -3   7   21.90    3.30
   7  -3  -7   24.50    4.60
   7  -3  -7   12.90    2.90
  -7   3   7   25.10    5.60
   7   3  -7   16.80    5.00
   7   3  -7   19.80    4.40
   6  -3  -7  532.45   16.50
  -6  -3   7  518.15   16.90
   6  -3  -7  520.55   15.20
  -6  -3   7  523.15   15.10
  -6   3   7  503.65   18.30
   6   3  -7  506.25   16.20
   6   3  -7  513.95   15.70
   6   3  -7  494.05   15.90
   5  -3  -7  248.08    9.10
  -5   3   7  264.67   12.70
   5   3  -7  270.97   11.10
  -5   3   7  271.97   12.40
   5   3  -7  257.97   11.00
   4  -3  -7  432.26   12.40
  -4  -3   7  430.86   17.20
  -4  -3   7  418.96   14.30
  -4  -3   7  430.86   12.80
  -4   3   7  409.26   13.50
  -4   3   7  415.56   15.10
  -4   3   7  393.56   15.70
   3  -3  -7  738.03   19.60
  -3  -3   7  748.33   24.00
  -3  -3   7  747.23   21.70
  -3   3   7  708.93   20.20
  -3   3   7  750.92   22.00
  -2  -3   7  314.77   12.90
  -2   3   7  330.77   13.10
  -2   3   7  320.27   11.60
  -2   3   7  290.47   11.90
  -1  -3   7 1139.29   32.50
  -1   3   7 1071.59   30.50
  -1   3   7 1188.28   31.10
   0   3   7   15.50    2.80
   0   3   7   19.20    3.90
   1  -3   7 1105.19   31.10
   1  -3   7 1110.59   28.30
   1   3   7 1123.49   31.20
   1   3   7 1095.19   29.10
   2  -3   7  306.57   11.60
   2  -3   7  304.87   11.20
   2   3   7  291.07    8.60
   2   3   7  313.07   11.70
   2   3   7  320.17   10.10
   3  -3   7  781.82   22.70
  -3  -3  -7  750.52   20.80
   3  -3   7  769.02   24.70
   3   3   7  755.42   19.70
   3   3   7  771.62   23.70
   3   3   7  805.02   21.40
   4  -3   7  423.26   18.60
  -4  -3  -7  440.86   13.10
   4   3   7  432.96   16.60
   4   3   7  441.36   11.90
   5  -3   7  246.98   17.10
   5   3   7  243.28    8.10
   5   3   7  264.77    9.70
  -6  -3  -7  516.15   15.60
   6   3   7  518.25   16.60
   6   3   7  529.05   14.20
   6   3   7  490.95   16.10
  -7  -3  -7   16.40    3.10
   7   3   7   17.20    4.10
   7   3   7   21.50    2.90
   7   3   7   16.90    2.80
  -8  -3  -7  438.56   14.00
   8  -3   7  404.26   13.80
   8   3   7  412.96   13.60
   8   3   7  414.66   15.40
   8   3   7  447.56   12.40
   9  -3   7  328.27   10.30
  -9  -3  -7  317.37   11.00
   9   3   7  331.77   11.20
   9   3   7  332.57    9.80
 -10  -3  -7   72.69    4.50
 -10  -3  -7   70.99    5.10
  10  -3   7   70.29    4.10
  10   3   7   76.39    4.30
  11  -3   7   52.89    3.20
 -11  -3  -7   55.39    4.60
 -11  -3  -7   57.79    3.80
  11   3   7   54.19    4.80
  11   3   7   52.69    2.70
 -11  -4   7  143.79    5.60
  11  -4  -7  143.09    5.90
 -10  -4   7  165.88    6.90
  10  -4  -7  169.38    7.00
  10  -4  -7  177.48    6.10
  10   4  -7  167.58    6.00
  -9  -4   7   37.90    4.20
   9  -4  -7   44.80    6.20
   9  -4  -7   43.40    3.90
   9   4  -7   45.00    4.70
   8  -4  -7  452.05   14.10
  -8  -4   7  426.26   15.50
   8  -4  -7  442.46   15.10
  -8   4   7  489.05   19.60
   8   4  -7  447.76   14.20
   8   4  -7  437.76   13.80
   7  -4  -7  191.98    8.30
   7  -4  -7  210.58    9.90
  -7  -4   7  199.78   10.00
  -7  -4   7  203.28    8.00
   7   4  -7  220.88    9.10
   7   4  -7  210.98    8.60
   7   4  -7  211.18    8.50
  -7   4   7  199.08   11.90
  -6  -4   7   69.49    6.50
   6  -4  -7   72.79    5.20
   6  -4  -7   69.39    6.80
  -6  -4   7   67.69    5.20
  -6   4   7   65.59    9.20
   6   4  -7   74.49    6.60
   6   4  -7   70.89    6.40
   6   4  -7   69.79    5.90
   5  -4  -7   85.09    5.20
  -5  -4   7   93.59    5.40
  -5  -4   7   82.29    6.90
   5   4  -7   75.89    6.50
  -5   4   7   78.99    8.40
   5   4  -7   77.89    6.80
   5   4  -7   87.99    6.90
   4  -4  -7 1019.70   26.20
  -4  -4   7  970.30   26.40
  -4  -4   7 1012.00   28.00
   4   4  -7  984.30   27.10
  -4   4   7  980.50   31.30
  -4   4   7 1026.00   29.00
  -3  -4   7  736.43   20.00
  -3  -4   7  735.93   24.50
   3  -4  -7  750.02   19.50
  -3  -4   7  738.73   21.50
  -3   4   7  724.63   23.80
  -3   4   7  696.83   21.70
  -3   4   7  694.53   20.30
  -2  -4   7  275.27   12.90
   2  -4  -7  288.27    9.00
  -2  -4   7  278.97   10.40
  -2  -4   7  275.47   12.20
  -2   4   7  308.07   12.10
  -2   4   7  293.57   11.40
  -2   4   7  272.87    9.70
  -1  -4   7  575.44   19.30
   1  -4  -7  527.85   15.00
  -1   4   7  542.45   15.30
  -1   4   7  548.95   18.20
  -1   4   7  556.04   16.50
   0  -4   7  106.49    7.80
   0   4   7  104.29    7.70
   0   4   7   93.39    4.70
   0   4   7   95.69    5.80
   1  -4   7  575.74   19.00
   1  -4   7  592.54   15.70
   1  -4   7  536.45   16.00
   1   4   7  579.94   17.10
   1   4   7  584.94   15.20
   1   4   7  563.24   19.40
  -2  -4  -7  293.37   10.10
   2  -4   7  297.87   12.10
   2   4   7  299.57   10.20
   2   4   7  302.37   12.40
  -3  -4  -7  772.72   20.80
   3  -4   7  770.32   25.80
   3  -4   7  763.42   22.80
   3   4   7  736.53   19.30
   3   4   7  781.42   21.50
   3   4   7  716.53   24.20
  -4  -4  -7 1042.20   27.10
   4  -4   7  969.50   34.50
   4   4   7 1070.59   28.20
   4   4   7 1006.10   25.80
  -5  -4  -7   84.89    5.30
   5   4   7   88.79    5.40
   5   4   7   85.79    9.00
  -6  -4  -7   68.09    5.40
   6   4   7   65.49    3.80
   6   4   7   69.89    7.50
   6   4   7   69.99    5.30
  -7  -4  -7  213.38    8.80
   7   4   7  205.08    9.60
   7   4   7  199.88    9.10
   7   4   7  212.68    7.20
  -8  -4  -7  445.46   14.80
   8   4   7  440.56   13.70
   8   4   7  416.56   15.60
   9  -4   7   45.40    4.80
  -9  -4  -7   37.20    3.90
   9   4   7   41.40    2.70
   9   4   7   44.40    5.30
  10  -4   7  163.98    6.30
 -10  -4  -7  178.48    7.10
 -10  -4  -7  166.38    6.50
  10   4   7  175.78    6.30
  10   4   7  171.98    5.60
  11  -4   7  130.39    5.00
 -11  -4  -7  145.69    5.80
 -11  -4  -7  133.09    5.60
  11   4   7  151.28    5.30
  10  -5  -7   87.49    4.80
 -10  -5   7   83.69    4.60
  10  -5  -7   75.69    4.30
  10   5  -7   90.39    3.90
   9  -5  -7  586.84   17.20
  -9  -5   7  591.64   17.20
   9  -5  -7  586.74   16.10
  -9   5   7  584.74   18.60
   9   5  -7  561.44   15.90
   9   5  -7  563.74   16.10
   8  -5  -7  204.18    9.40
  -8  -5   7  199.08    8.40
   8  -5  -7  204.48    7.60
   8   5  -7  192.48    8.30
  -8   5   7  196.38   10.20
   8   5  -7  195.78    8.10
  -7  -5   7  558.74   17.80
   7  -5  -7  554.44   17.70
  -7  -5   7  540.95   15.80
   7  -5  -7  548.85   16.50
   7   5  -7  555.44   16.30
   7   5  -7  543.75   16.50
  -7   5   7  542.15   20.20
  -6  -5   7  611.94   19.20
   6  -5  -7  603.34   17.70
  -6  -5   7  606.74   17.30
   6   5  -7  611.84   18.00
  -6   5   7  616.14   21.50
   6   5  -7  587.44   17.70
   6   5  -7  615.84   18.10
  -5  -5   7 1701.23   45.30
   5  -5  -7 1741.63   44.00
  -5  -5   7 1716.43   43.90
   5   5  -7 1756.72   44.60
  -5   5   7 1767.42   47.50
   5   5  -7 1690.03   44.00
   5   5  -7 1731.13   44.20
  -4  -5   7   54.89    7.00
  -4  -5   7   41.40    4.40
   4  -5  -7   46.10    4.30
   4   5  -7   39.00    4.70
  -4   5   7   49.50    7.50
  -4   5   7   50.59    7.80
   4   5  -7   45.50    6.00
   4   5  -7   42.80    4.80
   3  -5  -7 1828.62   45.20
  -3  -5   7 1760.12   46.70
  -3  -5   7 1836.72   45.50
   3   5  -7 1815.92   46.60
  -3   5   7 1775.82   51.19
  -2  -5   7   65.69    9.30
  -2  -5   7   43.60    9.60
  -2  -5   7   45.90    5.60
   2  -5  -7   48.90    3.90
  -2   5   7   52.39    5.90
  -2   5   7   44.10    6.70
  -1  -5   7  247.28   10.90
   1  -5  -7  266.47    8.50
  -1  -5   7  261.97   13.20
  -1   5   7  273.97   10.50
  -1   5   7  264.27    9.20
  -1   5   7  266.57   11.50
   0  -5   7  162.28   10.40
   0  -5  -7  156.58    6.20
   0   5   7  169.88    7.50
   0   5   7  166.18    6.50
   0   5   7  167.18    8.20
  -1  -5  -7  249.18    8.60
   1  -5   7  256.97   12.50
   1   5   7  267.77    8.20
   1   5   7  256.27   13.50
   1   5   7  272.77    9.30
   1   5   7  273.47   10.30
  -2  -5  -7   48.00    6.00
   2  -5   7   32.80    4.50
   2   5   7   39.20    3.80
   2   5   7   45.30    3.10
   2   5   7   43.50    4.10
   2   5   7   44.90    7.70
  -3  -5  -7 1848.92   44.70
  -3  -5  -7 1682.43   45.30
   3   5   7 1823.02   46.30
   3   5   7 1697.53   43.90
  -4  -5  -7   53.09    5.20
  -4  -5  -7   66.29    8.30
   4   5   7   50.49    3.10
   4   5   7   47.10    4.40
   4   5   7   60.39    8.10
  -5  -5  -7 1662.03   44.90
  -5  -5  -7 1752.72   44.10
   5   5   7 1690.03   43.90
   5   5   7 1732.93   42.60
   5   5   7 1756.82   45.80
  -6  -5  -7  616.14   18.10
   6   5   7  568.34   18.80
   6   5   7  648.24   24.20
   6   5   7  613.24   16.50
  -7  -5  -7  552.04   16.90
   7   5   7  530.15   16.40
   7   5   7  545.85   18.40
   7   5   7  562.94   15.10
  -8  -5  -7  173.88    7.60
   8   5   7  210.18    8.40
   8   5   7  225.48   15.20
   8   5   7  193.68    6.40
  -9  -5  -7  597.74   17.20
   9  -5   7  584.24   16.50
   9   5   7  582.84   16.30
   9   5   7  606.74   15.70
 -10  -5  -7   81.09    4.50
 -10  -5  -7   86.09    4.40
  10  -5   7   81.09    4.70
  10   5   7   83.79    4.20
  10   5   7   84.59    3.70
  10   5   7   80.09    4.40
  10  -6  -7   57.39    4.20
 -10  -6   7   59.29    3.90
  10  -6  -7   54.89    4.00
  10   6  -7   57.49    3.20
  -9  -6   7  284.67    9.60
   9  -6  -7  281.97    9.60
   9  -6  -7  292.57    8.90
   9   6  -7  287.67    8.90
  -9   6   7  292.67   11.30
   9   6  -7  277.37    8.80
   8  -6  -7  152.48    6.40
  -8  -6   7  157.88    7.20
   8  -6  -7  165.28    8.40
  -8   6   7  157.08    9.10
   8   6  -7  165.48    7.40
   8   6  -7  166.98    7.30
  -7  -6   7   96.09    6.20
   7  -6  -7   96.19    7.40
   7  -6  -7  105.09    5.40
  -7  -6   7   96.49    4.80
   7   6  -7  105.69    6.20
  -7   6   7   91.59    8.20
   7   6  -7  106.99    6.30
  -6  -6   7   46.60    4.40
   6  -6  -7   36.00    4.90
  -6  -6   7   39.60    6.40
   6   6  -7   35.90    5.00
  -6   6   7   37.90    6.90
   6   6  -7   37.90    5.30
   6   6  -7   41.40    5.30
  -5  -6   7  200.08    8.00
  -5  -6   7  208.98    9.90
   5  -6  -7  194.68    8.10
   5   6  -7  208.68    8.80
  -5   6   7  205.78   12.10
   5   6  -7  209.28    8.90
   5   6  -7  194.28    8.40
   4  -6  -7  141.39    6.50
  -4  -6   7  138.39    6.60
  -4  -6   7  132.69    9.20
   4   6  -7  157.48    8.00
   4   6  -7  144.29    7.10
   4   6  -7  153.48    7.90
  -4   6   7  150.08   10.20
  -3  -6   7  317.27   10.70
   3  -6  -7  303.07   15.50
   3  -6  -7  326.77   10.40
  -3  -6   7  311.57   14.80
   3   6  -7  334.97   11.90
  -3   6   7  351.56   13.80
   3   6  -7  315.57   11.00
   3   6  -7  335.67   12.00
  -3   6   7  344.57   16.70
  -3   6   7  308.77   15.80
  -2  -6   7  808.12   21.90
   2  -6  -7  786.92   23.80
   2  -6  -7  804.52   21.20
  -2   6   7  738.63   25.90
   2   6  -7  804.82   21.80
  -2   6   7  816.82   24.20
  -2   6   7  797.92   27.00
   2   6  -7  763.32   22.50
   1  -6  -7  306.67   12.50
  -1  -6   7  288.37   10.70
   1   6  -7  287.57   12.20
  -1   6   7  307.17   11.90
   1   6  -7  284.47   10.30
  -1   6   7  288.17   13.10
   0  -6  -7 1513.55   40.10
   0  -6  -7 1559.44   38.30
   0   6   7 1532.75   40.20
   0   6   7 1525.05   43.00
   0   6   7 1523.25   38.60
   0   6  -7 1522.45   39.10
  -1  -6  -7  294.07   11.80
  -1  -6  -7  297.27    9.40
   1  -6   7  248.48   15.40
   1   6   7  297.07    9.50
   1   6   7  318.87   10.80
   1   6   7  316.17   12.30
  -1   6  -7  302.87   10.80
  -2  -6  -7  773.22   20.60
  -2  -6  -7  785.82   22.40
   2   6   7  731.23   22.90
   2   6   7  812.82   20.50
   2   6   7  818.02   24.00
  -2   6  -7  742.53   24.30
   2   6   7  777.12   21.70
  -3  -6  -7  332.67   11.60
  -3  -6  -7  325.77   12.20
  -3   6  -7  307.67   14.80
   3   6   7  325.17   10.80
   3   6   7  325.67   12.40
   3   6   7  319.07    9.70
   3   6   7  303.87   12.70
  -4  -6  -7  140.19    7.30
  -4  -6  -7  148.89    8.70
   4   6   7  152.48    5.70
   4   6   7  148.69    6.80
   4   6   7  129.79    8.60
   4   6   7  151.38    8.10
  -5  -6  -7  201.58    8.50
  -5  -6  -7  175.08   12.00
   5   6   7  177.78   11.20
   5   6   7  182.78   10.20
   5   6   7  191.78    6.80
   5   6   7  194.08    7.90
  -6  -6  -7   37.30    5.40
   6   6   7   36.30    3.50
   6   6   7   36.60    6.50
   6   6   7   40.60    5.80
  -7  -6  -7  101.79    5.60
   7   6   7  101.19    6.50
   7   6   7   98.79    9.00
   7   6   7   96.39    5.10
   7   6   7  105.49    4.30
  -8  -6  -7  160.18    6.70
   8   6   7  156.48    6.30
   8   6   7  152.48    7.00
   8   6   7  161.78    5.50
  -9  -6  -7  292.97    9.60
   9   6   7  290.87    9.00
   9   6   7  292.47    8.50
   9   6   7  288.87    9.20
 -10  -6  -7   63.59    3.90
 -10  -6  -7   61.09    3.70
  10   6   7   60.39    4.10
  10   6   7   45.70    4.50
   9  -7  -7  180.18    6.70
  -9  -7   7  180.08    6.80
   9  -7  -7  172.88    6.30
   9   7  -7  186.78    6.10
   8  -7  -7  272.97    9.50
  -8  -7   7  276.97    9.50
   8  -7  -7  283.67    8.90
   8   7  -7  264.07    8.50
   8   7  -7  266.07    8.70
  -8   7   7  275.47   11.40
  -7  -7   7   56.89    4.90
   7  -7  -7   47.00    6.00
  -7  -7   7   44.20    3.50
   7  -7  -7   47.60    3.90
   7   7  -7   46.70    4.90
   7   7  -7   49.00    4.90
  -7   7   7   33.60    4.90
  -6  -7   7  279.67   10.50
  -6  -7   7  285.57    9.20
   6  -7  -7  293.97    9.80
   6   7  -7  298.17   10.20
   6   7  -7  289.87   10.40
  -6   7   7  281.07   12.90
  -5  -7   7 1052.59   29.50
  -5  -7   7 1060.59   28.00
   5  -7  -7 1065.09   28.40
   5   7  -7 1059.29   28.50
   5   7  -7 1056.59   28.20
   5   7  -7 1077.69   28.70
  -5   7   7 1042.80   32.60
   4  -7  -7  246.68    9.10
  -4  -7   7  242.68    9.00
   4   7  -7  246.48    9.80
   4   7  -7  251.07    9.80
  -4   7   7  245.18   13.10
   4   7  -7  242.68    9.30
   3  -7  -7 1792.62   48.50
   3  -7  -7 1823.02   46.00
  -3  -7   7 1840.62   46.10
   3   7  -7 1845.62   46.70
  -3   7   7 1752.02   54.19
  -3   7   7 1849.61   49.00
   3   7  -7 1820.12   46.40
  -3   7   7 1851.31   49.80
  -2  -7   7 2082.99   52.49
   2  -7  -7 2084.69   54.29
   2  -7  -7 2120.09   52.29
   2   7  -7 2131.69   52.79
  -2   7   7 2154.08   55.89
  -2   7   7 2084.59   60.19
   2   7  -7 2079.39   53.49
   2   7  -7 2115.99   53.39
  -2   7   7 2040.10   54.99
   1  -7  -7 1022.00   28.20
   1  -7  -7 1001.40   26.10
  -1  -7   7 1000.60   26.50
   1   7  -7  999.30   27.60
  -1   7   7  974.00   29.30
   1   7  -7  984.80   27.90
  -1   7   7 1011.20   32.60
  -1   7   7 1006.20   29.20
   1   7  -7  993.40   26.70
   0  -7   7 1024.40   27.10
   0  -7  -7  995.20   28.30
   0  -7  -7 1022.00   26.50
   0   7   7 1005.50   29.20
   0   7   7 1047.60   29.10
   0   7  -7 1066.89   27.40
   0   7  -7 1008.50   28.80
   0   7   7 1036.00   32.40
   0   7  -7  988.20   28.50
  -1  -7  -7  983.20   25.70
  -1  -7  -7  994.10   27.70
   1   7   7  962.30   28.10
   1   7   7 1005.80   27.80
   1   7   7 1006.80   30.90
  -1   7  -7  994.80   28.50
  -2  -7  -7 2100.09   52.99
   2   7   7 2054.39   51.29
   2   7   7 2092.99   52.79
   2   7   7 1955.40   52.69
  -2   7  -7 2075.39   53.99
   2   7   7 2129.39   56.49
  -3  -7  -7 1618.84   48.80
   3   7   7 1736.53   45.80
   3   7   7 1791.12   44.40
   3   7   7 1822.12   45.90
   3   7   7 1809.02   49.20
  -3   7  -7 1892.61   47.80
  -4  -7  -7  247.18   10.60
  -4  -7  -7  250.07   10.50
   4   7   7  245.08   10.50
   4   7   7  241.88   11.70
   4   7   7  246.58    9.70
   4   7   7  239.78    8.30
  -5  -7  -7 1075.79   28.50
  -5  -7  -7 1003.40   28.80
   5   7   7 1044.30   31.70
   5   7   7 1030.20   28.20
   5   7   7 1047.10   26.90
   5   7   7 1045.50   28.10
  -6  -7  -7  296.77   10.30
  -6  -7  -7  297.17   12.20
   6   7   7  281.37    9.90
   6   7   7  293.17   10.70
   6   7   7  295.87   14.60
   6   7   7  289.57    8.90
  -7  -7  -7   45.00    4.40
   7   7   7   44.40    4.10
   7   7   7   50.19    6.80
   7   7   7   49.99    3.60
  -8  -7  -7  283.07    9.40
   8   7   7  264.47    9.00
   8   7   7  279.17    8.80
  -9  -7  -7  184.48    6.60
   9   7   7  154.58    6.70
   9   7   7  166.38    7.50
   8  -8  -7   84.79    4.40
   8  -8  -7   88.79    4.60
   8   8  -7   87.79    4.10
  -8   8   7   94.19    6.40
   7  -8  -7  374.96   11.90
  -7  -8   7  362.86   10.50
   7  -8  -7  373.26   11.20
   7   8  -7  377.36   11.20
  -7   8   7  371.66   13.80
   7   8  -7  374.46   10.90
   6  -8  -7   46.60    3.90
  -6  -8   7   42.50    3.40
  -6   8   7   37.80    4.80
   6   8  -7   55.89    5.00
   6   8  -7   51.99    5.10
  -5  -8   7   11.50    2.00
   5  -8  -7   14.40    2.50
   5   8  -7   20.70    3.50
   5   8  -7   12.50    2.90
  -5   8   7    7.60    4.30
   4  -8  -7  357.86   11.70
  -4  -8   7  353.66   11.40
   4   8  -7  352.06   11.90
  -4   8   7  343.27   15.90
   4   8  -7  348.27   11.70
   4   8  -7  348.37   12.20
  -3  -8   7  323.87   10.70
   3  -8  -7  316.37   14.10
   3  -8  -7  331.57   10.80
  -3   8   7  299.57   18.80
   3   8  -7  336.27   12.00
   3   8  -7  320.67   11.50
   3   8  -7  333.67   11.10
  -3   8   7  323.87   14.10
  -3   8   7  311.07   14.70
   2  -8  -7  289.17   12.60
   2  -8  -7  306.57   10.00
  -2  -8   7  301.97    9.90
  -2   8   7  276.97   13.30
   2   8  -7  298.07   11.00
   2   8  -7  295.77   10.40
   2   8  -7  290.27   11.70
  -2   8   7  282.57   17.40
   1  -8  -7   53.59    7.00
  -1  -8   7   61.59    4.90
   1  -8  -7   55.39    4.50
  -1   8   7   52.69    7.80
   1   8  -7   52.99    5.30
   1   8  -7   59.19    6.90
  -1   8   7   52.69    9.70
   1   8  -7   50.09    7.10
  -1   8   7   50.79    6.80
   0  -8   7  128.29    6.50
   0  -8  -7  132.99    6.20
   0  -8  -7  127.39    8.30
   0   8   7  146.09   11.40
   0   8  -7  128.59    9.20
   0   8   7  138.59   10.50
   0   8   7  135.79    9.20
  -1  -8  -7   58.99    5.00
   1  -8   7   65.49    5.80
  -1  -8  -7   52.59    6.40
   1   8   7   49.00    6.00
   1   8   7   58.59    9.00
   1   8   7   53.79    6.90
  -1   8  -7   67.69    8.40
  -2  -8  -7  318.97   11.80
   2   8   7  304.57   12.40
   2   8   7  284.77   11.90
  -2   8  -7  313.07   13.50
   2   8   7  307.57   15.20
  -3  -8  -7  314.37   12.10
   3   8   7  314.87   12.10
  -3   8  -7  332.47   14.00
   3   8   7  325.07   12.20
   3   8   7  305.07   15.60
  -4  -8  -7  353.56   12.80
   4   8   7  328.47   16.50
   4   8   7  349.77   12.70
   4   8   7  348.07   12.50
  -5  -8  -7   12.80    3.90
   5   8   7   17.30    3.70
   5   8   7   22.10    9.10
   5   8   7   13.50    2.90
   6   8   7   48.50    6.90
   6   8   7   43.00    4.50
   7   8   7  381.96   11.90
   7   8   7  368.66   11.30
   8   8   7   86.39    4.70
   8   8   7   76.39    6.10
   7  -9  -7  143.49    5.50
   7  -9  -7  119.79    5.20
   7   9  -7  128.79    5.10
  -6  -9   7   69.29    3.60
   6  -9  -7   76.09    4.30
   6  -9  -7   76.09    4.30
   6   9  -7   73.99    4.20
  -6   9   7   65.49    6.30
   5  -9  -7  322.97   10.10
  -5  -9   7  329.67    9.70
  -5   9   7  314.17   12.90
   5   9  -7  320.37   10.50
   4  -9  -7   35.20    3.60
  -4  -9   7   33.30    3.10
   4   9  -7   40.50    5.60
   4   9  -7   34.20    3.70
  -4   9   7   25.50    4.30
   3  -9  -7  140.59    5.70
  -3  -9   7  135.79    5.50
   3  -9  -7  143.39   10.70
   3   9  -7  124.29    7.70
  -3   9   7  124.49    8.50
   2  -9  -7   34.60    3.60
  -2  -9   7   31.40    3.40
   2  -9  -7   41.90    5.80
   2   9  -7   36.20    4.10
  -2   9   7   36.60    5.90
   2   9  -7   35.90    4.60
  -2   9   7   32.40    4.50
  -2   9   7   31.00    9.30
  -1  -9   7   12.10    4.20
   1  -9  -7   12.30    3.90
  -1   9   7    3.80    8.00
   1   9  -7    0.60    4.00
   1   9  -7   -0.20    3.80
  -1   9   7    5.40    4.80
  -1   9   7    2.90    7.60
   0  -9  -7   15.30    3.80
   0  -9  -7   26.50    3.60
   0  -9   7   19.10    3.30
   0   9  -7   28.00    4.80
   0   9   7    9.20    7.20
   0   9   7   26.40    5.60
   0   9   7   38.80    5.50
  -1  -9  -7    8.70    3.60
   1   9   7    0.50    7.30
   1   9   7    9.70    4.70
  -1   9  -7   12.30    4.80
  -2  -9  -7   36.40    5.60
   2  -9   7   32.50    3.80
  -2   9  -7   35.70    5.50
   2   9   7   36.90    4.90
   2   9   7   27.80    8.20
   2   9   7   27.70    3.80
   3  -9   7  127.09    5.80
  -3  -9  -7  121.79    7.50
  -3   9  -7  130.19    9.40
   3   9   7  127.09    7.20
   3   9   7  141.79    8.20
  -4  -9  -7   33.20    4.50
   4  -9   7   34.90    3.80
   4   9   7   41.10    6.20
   4   9   7   33.30    3.90
  -5  -9  -7  338.57   11.00
   5   9   7  319.77   10.60
   5   9   7  308.17   11.20
  -6  -9  -7   76.69    5.70
   6   9   7   66.49    4.60
   6   9   7   69.19    6.20
  -7  -9  -7  130.29    5.60
   7   9   7  124.19    5.70
  -6 -10   7    5.80    2.10
   6 -10  -7    1.20    1.70
   6 -10  -7    4.60    2.40
  -6  10   7    6.50    3.60
   6  10  -7    5.00    2.00
  -5 -10   7  142.59    4.90
   5  10  -7  132.29    5.70
  -5  10   7  138.89    7.90
  -4 -10   7   60.59    3.40
   4 -10  -7   63.09    4.00
   4  10  -7   65.89    4.50
  -4  10   7   67.79    6.40
   3 -10  -7   65.09    7.10
   3 -10  -7   61.19    4.20
  -3 -10   7   67.99    3.60
  -3  10   7   63.39    6.70
   3  10  -7   64.09    5.00
   2 -10  -7   97.59    6.80
  -2 -10   7   91.09    4.30
   2 -10  -7   90.39    4.60
   2  10  -7   68.89    5.90
  -2  10   7  100.69    7.40
  -2  10   7   97.09    6.90
  -1 -10   7  103.29    4.50
   1 -10  -7  100.59    7.70
   1 -10  -7  104.39    4.90
   1  10  -7  104.59    7.50
  -1  10   7   96.89    7.40
   0 -10   7    0.80    1.70
   0 -10  -7   -4.40    3.20
   0 -10  -7   -2.20    2.60
   0  10   7    4.30    7.50
   0  10  -7    6.80    4.20
   0  10   7    7.80    3.80
   1 -10   7  103.19    4.50
  -1 -10  -7  102.39    7.00
  -1  10  -7   88.29    8.40
   1  10   7   87.99   10.30
   1  10   7   86.19    7.00
   2 -10   7   90.69    4.30
  -2 -10  -7   91.69    6.60
   2  10   7  104.69    6.20
  -2  10  -7   89.29    6.70
   2  10   7   85.39    6.90
   3 -10   7   63.59    4.00
  -3 -10  -7   66.99    4.70
   3  10   7   60.79    5.30
   3  10   7   72.69    6.70
  -4 -10  -7   61.89    4.60
   4 -10   7   55.49    4.60
   4  10   7   67.19    7.00
   4  10   7   57.49    4.90
  -5 -10  -7  145.69    6.10
   5 -10   7  126.29    6.20
   5  10   7  107.69    8.80
   5  10   7  132.59    6.00
   6  10   7    1.30    3.00
   4 -11  -7  120.29    6.00
  -4 -11   7  144.29    4.70
   4  11  -7  139.49    5.50
  -4  11   7  130.59    7.60
   3 -11  -7  266.87    8.70
  -3 -11   7  290.67    8.40
  -3  11   7  273.57   11.00
   3  11  -7  280.87    9.10
   2 -11  -7   35.60    5.30
  -2 -11   7   22.90    2.40
   2 -11  -7   16.20    3.10
   2  11  -7   22.60    2.90
  -1 -11   7  410.86   11.40
   1 -11  -7  417.96   13.00
  -1  11   7  410.56   14.10
   1  11  -7  417.36   12.80
  -1  11   7  398.46   12.90
   0 -11  -7  236.88    8.80
   0 -11   7  240.78    7.30
   0  11  -7  236.98    8.80
   0  11   7  232.88   10.30
   0  11   7  225.18    9.00
   1 -11   7  407.56   11.90
   1 -11   7  407.06   11.40
  -1 -11  -7  426.76   12.90
   1  11   7  415.86   12.80
   1  11   7  397.16   16.30
  -1  11  -7  406.86   12.90
  -2 -11  -7   27.40    3.70
   2  11   7   37.30    4.90
   2  11   7   36.80    5.40
   3 -11   7  280.97    8.60
  -3 -11  -7  292.17    9.60
   3  11   7  294.17    9.70
  -4 -11  -7  138.09    5.70
   4 -11   7  125.59    5.30
   4  11   7  121.69    6.60
  -1 -12   7   38.50    2.60
  -1 -12   7   48.00    3.10
   1 -12  -7   36.90    4.90
   1  12  -7   42.60    4.50
   0 -12   7   91.09    4.50
   0 -12   7   96.09    3.70
   0  12  -7   91.39    5.20
   1 -12   7   36.30    2.80
  -1 -12  -7   41.80    3.80
  11   0  -8   44.50    4.50
  11   0  -8   44.50    3.30
 -11   0   8   42.00    3.80
  10   0  -8   12.50    2.80
 -10   0   8   19.90    3.00
  10   0  -8   13.70    2.30
   9   0  -8   32.10    4.50
  -9   0   8   33.00    5.10
   8   0  -8  298.77   11.70
  -8   0   8  303.27   12.40
   7   0  -8  390.86   11.80
   7   0  -8  410.76   14.10
  -7   0   8  385.06   14.40
   6   0  -8  897.01   25.80
  -6   0   8  962.90   26.70
  -6   0   8  902.31   25.20
   6   0  -8  913.41   23.80
   5   0  -8  615.24   17.00
  -5   0   8  643.94   17.80
  -5   0   8  631.14   22.20
  -5   0   8  629.74   19.40
  -4   0   8  198.88    7.70
  -4   0   8  194.38   10.30
  -3   0   8  116.49    6.10
  -3   0   8  131.69    7.90
   3   0  -8  126.49    6.60
  -2   0   8 2382.46   59.79
   2   0  -8 2408.26   59.59
  -1   0   8 3450.35   84.79
  -1   0   8 3260.47   81.69
   0   0  -8 3900.51   94.39
   0   0   8 3746.13   93.09
   0   0   8 3773.92   91.99
   1   0   8 3318.27   81.59
   1   0   8 3436.46   83.09
  -1   0  -8 3362.96   85.69
   2   0   8 2343.67   58.59
   2   0   8 2334.57   56.89
  -2   0  -8 2247.38   62.49
   3   0   8  126.09    6.80
   3   0   8  123.99    5.60
   4   0   8  211.08   10.40
  -4   0  -8  194.98    7.70
   4   0   8  198.08    7.70
   5   0   8  608.54   22.90
   5   0   8  636.74   19.20
  -5   0  -8  666.33   18.20
  -6   0  -8  888.41   26.20
   6   0   8  888.01   23.90
   6   0   8  945.01   26.70
  -6   0  -8  923.31   24.90
  -7   0  -8  406.66   13.30
   7   0   8  417.06   12.30
  -7   0  -8  407.06   15.10
   7   0   8  399.16   14.90
  -8   0  -8  306.07   13.20
   8   0   8  321.87   13.40
  -8   0  -8  311.27   11.30
   8   0   8  309.47   10.00
   9   0   8   29.40    4.70
  -9   0  -8   32.10    5.80
  -9   0  -8   29.30    3.10
   9   0   8   28.60    3.10
 -10   0  -8   10.00    4.20
  10   0   8   20.50    2.70
 -10   0  -8   13.30    2.90
  10   0   8   18.10    2.60
  11   0   8   45.60    2.80
  11   0   8   45.20    5.30
  11  -1  -8   10.20    2.70
 -11  -1   8    4.40    2.50
  11  -1  -8    9.70    2.00
  11   1  -8    6.90    2.00
 -10  -1   8   22.40    3.00
  10  -1  -8   20.60    2.80
 -10   1   8   19.20    3.50
  10   1  -8   20.90    2.50
  10   1  -8   20.30    2.70
  -9  -1   8   57.99    5.30
   9  -1  -8   47.60    4.10
   9  -1  -8   67.09    6.70
   9   1  -8   62.29    5.60
   9   1  -8   52.79    6.30
  -9   1   8   63.39    6.00
   8  -1  -8  110.29    5.90
  -8  -1   8  104.29    7.70
   8  -1  -8   97.59    7.80
   8   1  -8   94.79    7.10
  -8   1   8  103.69    8.50
   7  -1  -8  307.97   12.00
  -7  -1   8  295.47   10.40
  -7  -1   8  295.57   12.20
  -7   1   8  288.67   12.20
   7   1  -8  293.57   11.70
  -7   1   8  293.47   14.70
  -6  -1   8   17.90    4.20
  -6  -1   8   22.30    3.30
   6  -1  -8   22.80    3.00
   6  -1  -8   26.40    4.60
   6   1  -8   20.60    4.50
  -6   1   8   20.40    6.90
  -6   1   8   24.40    4.00
   6   1  -8   25.00    6.70
  -6   1   8   16.20    4.00
   5  -1  -8   42.90    4.20
  -5  -1   8   33.80    5.10
   5  -1  -8   27.10    5.10
  -5  -1   8   35.50    4.50
  -5  -1   8   29.50    4.40
  -5   1   8   47.60    7.50
   5   1  -8   34.80    5.30
  -5   1   8   32.50    4.50
  -5   1   8   36.80    4.80
  -4  -1   8  418.76   16.10
  -4  -1   8  378.46   12.10
   4  -1  -8  386.96   11.80
  -4   1   8  396.36   12.40
  -4   1   8  404.16   15.40
  -3  -1   8 2753.32   69.59
   3  -1  -8 2663.03   67.69
  -3  -1   8 2555.24   65.29
  -3   1   8 2589.44   65.19
  -3   1   8 2722.83   68.79
  -3   1   8 2672.73   67.69
  -2  -1   8   33.90    4.90
   2  -1  -8   32.10    4.40
  -2   1   8   34.00    4.40
  -1  -1   8 3673.03  103.39
  -1  -1   8 4097.79   97.99
   1  -1  -8 4222.98  100.39
   1   1  -8 4194.48   98.79
  -1   1   8 4152.08   99.39
   0  -1  -8   16.20    4.30
   0  -1   8   15.50    2.30
   0  -1   8   13.60    1.80
   0   1   8   10.30    2.20
   0   1  -8   10.10    2.40
   0   1   8   11.10    2.50
   1  -1   8 4361.36  105.59
   1  -1   8 4241.58  101.79
   1  -1   8 4296.87  102.89
  -1  -1  -8 4163.08  106.49
   1   1   8 4159.98  102.29
   1   1   8 4168.08  104.09
   2  -1   8   31.00    3.20
   2  -1   8   33.20    2.80
  -2  -1  -8   24.30    5.40
   2   1   8   31.70    3.50
   2   1   8   30.30    2.80
  -3  -1  -8 2693.43   65.69
   3  -1   8 2509.95   70.89
   3  -1   8 2619.74   66.09
   3   1   8 2778.72   66.29
   3   1   8 2754.82   68.79
   4  -1   8  418.06   16.30
  -4  -1  -8  408.46   12.70
   4   1   8  420.36   13.10
   4   1   8  417.36   15.70
  -4   1  -8  415.86   12.80
  -5  -1  -8   35.60    4.20
   5  -1   8   44.20    9.00
   5   1   8   40.60    3.80
  -5   1  -8   34.10    4.60
   5   1   8   38.90    4.30
  -6  -1  -8   13.80    2.60
   6   1   8   14.10    2.50
   6   1   8   19.60    3.30
   7  -1   8  287.37   10.60
   7  -1   8  288.87   12.40
  -7  -1  -8  294.47   10.70
   7   1   8  305.77    9.60
  -7   1  -8  313.97   14.10
  -7   1  -8  308.87   11.00
   7   1   8  320.87   12.40
  -8  -1  -8  111.29    8.30
   8  -1   8  101.19    6.00
  -8  -1  -8   99.99    6.50
   8  -1   8  106.09    8.50
  -8   1  -8  100.99   10.10
   8   1   8  102.99    7.80
  -8   1  -8   99.19    6.90
   8   1   8   99.79    5.20
   9  -1   8   60.29    8.90
   9  -1   8   57.49    3.90
  -9  -1  -8   60.09    4.50
  -9  -1  -8   64.79    7.60
   9   1   8   54.49    6.20
  -9   1  -8   46.00    5.50
   9   1   8   60.49    7.90
   9   1   8   63.69    3.50
  10  -1   8   16.90    2.10
 -10  -1  -8   18.80    2.60
 -10  -1  -8   24.90    3.80
  10   1   8   20.60    2.50
  10   1   8   23.30    2.80
  11  -1   8    5.00    1.50
  11   1   8    6.00    1.40
  11  -2  -8   10.70    2.60
 -11  -2   8    9.00    2.30
  11  -2  -8    4.00    2.00
  11   2  -8    8.60    2.00
 -10  -2   8  135.89    6.40
  10  -2  -8  144.59    6.50
  10   2  -8  138.29    5.60
  10   2  -8  143.49    6.00
  -9  -2   8  598.14   18.60
   9  -2  -8  625.14   16.80
   9  -2  -8  653.83   19.00
   9   2  -8  579.04   18.00
   9   2  -8  637.64   17.80
   8  -2  -8   33.60    4.80
   8  -2  -8   27.70    4.60
  -8  -2   8   41.10    6.50
   8   2  -8   41.30    5.50
   8   2  -8   29.40    4.30
  -8   2   8   41.40    5.70
  -8   2   8   36.20    6.70
  -7  -2   8  483.95   16.30
  -7  -2   8  485.15   14.50
   7  -2  -8  466.55   15.70
   7  -2  -8  492.35   14.10
   7   2  -8  459.15   14.80
  -7   2   8  478.55   16.70
   7   2  -8  464.55   17.90
   7   2  -8  474.25   15.50
  -7   2   8  476.35   18.00
  -6  -2   8   29.90    4.40
   6  -2  -8   22.30    4.00
  -6  -2   8   26.80    4.00
   6  -2  -8   32.90    4.30
   6   2  -8   34.10    4.70
  -6   2   8   37.50    6.30
   6   2  -8   23.50    4.50
   6   2  -8   31.00    4.70
  -6   2   8   37.80    5.40
  -5  -2   8  278.07   11.70
   5  -2  -8  298.17   12.00
   5  -2  -8  312.67    9.90
  -5  -2   8  304.87   16.50
  -5   2   8  322.87   12.60
  -5   2   8  324.37   10.80
   5   2  -8  312.37   11.90
  -5   2   8  316.67   13.80
   4  -2  -8  198.08    7.40
  -4  -2   8  194.48   12.00
  -4  -2   8  193.88    7.80
  -4  -2   8  201.68    9.40
  -4   2   8  190.98   11.30
  -4   2   8  208.48    8.20
  -4   2   8  202.58   11.10
  -3  -2   8  704.93   20.10
  -3  -2   8  767.22   24.30
  -3   2   8  749.53   23.40
  -3   2   8  721.73   20.00
  -3   2   8  762.02   23.10
  -3   2   8  718.73   22.80
   2  -2  -8  807.12   24.10
  -2  -2   8  837.32   25.30
  -2   2   8  746.93   21.20
  -2   2   8  832.22   23.60
   1  -2  -8  205.28    9.50
  -1  -2   8  207.68    9.60
  -1   2   8  196.88    8.20
   0  -2   8  168.68    9.50
   0  -2  -8  177.18    9.30
   0   2   8  174.78    8.10
   0   2   8  179.48    6.90
   1  -2   8  212.48    6.40
   1  -2   8  201.28    9.40
  -1  -2  -8  180.98   11.60
   1  -2   8  217.18    6.90
   1   2   8  223.38    7.50
   2  -2   8  805.22   21.90
   2  -2   8  844.22   25.00
  -2  -2  -8  804.32   22.40
   2  -2   8  853.81   23.60
   2   2   8  861.41   22.60
   2   2   8  867.71   24.70
   3  -2   8  764.82   22.70
  -3  -2  -8  750.62   20.10
   3   2   8  775.62   23.00
   3   2   8  705.23   20.50
   3   2   8  690.93   18.90
   4  -2   8  209.28   10.90
   4  -2   8  207.88   11.60
  -4  -2  -8  218.08    7.90
   4   2   8  200.88   10.60
   4   2   8  216.28    8.00
   4   2   8  195.78    6.80
   5  -2   8  305.67   17.20
   5   2   8  331.47   11.40
  -5   2  -8  330.07   11.30
   5   2   8  318.17    9.60
  -6  -2  -8   34.70    4.30
   6   2   8   30.00    4.20
   6   2   8   33.30    3.50
  -6   2  -8   49.10    7.10
  -6   2  -8   30.80    7.70
  -7  -2  -8  506.35   15.60
   7   2   8  521.35   14.10
  -7   2  -8  501.95   18.70
   7   2   8  479.85   16.00
   7   2   8  504.85   17.10
   8  -2   8   41.30    7.50
  -8  -2  -8   39.90    5.10
   8  -2   8   33.10    4.20
   8   2   8   38.20    5.80
   8   2   8   37.40    3.60
   8   2   8   40.40    4.80
  -9  -2  -8  641.64   19.80
  -9  -2  -8  622.54   18.60
   9  -2   8  635.74   17.40
   9   2   8  642.84   17.30
   9   2   8  689.33   24.60
   9   2   8  620.64   18.40
 -10  -2  -8  140.39    6.80
  10  -2   8  132.69    5.30
 -10  -2  -8  138.09    6.00
  10   2   8  140.39    5.00
  10   2   8  139.19    5.80
 -11  -2  -8    3.90    2.30
  11  -2   8    4.90    2.50
  11  -2   8    7.20    1.60
 -11  -2  -8   -1.50    3.10
  11   2   8    9.10    1.70
 -11  -3   8  231.38    7.60
  11  -3  -8  212.18    7.30
  11  -3  -8  216.78    6.80
  11   3  -8  204.38    7.00
 -10  -3   8   74.39    4.70
  10  -3  -8   69.69    4.90
  10  -3  -8   67.29    4.50
  10   3  -8   73.39    4.50
  10   3  -8   72.59    4.00
   9  -3  -8  101.59    5.00
   9  -3  -8  102.59    7.30
  -9  -3   8   97.39    6.00
   9   3  -8  110.19    6.70
   9   3  -8  115.39    6.20
   8  -3  -8  130.19    8.30
  -8  -3   8  140.89    8.40
   8  -3  -8  136.49    6.70
   8   3  -8  137.69    7.50
  -8   3   8  115.19   11.00
   8   3  -8  137.49    7.10
   7  -3  -8   21.10    3.20
  -7  -3   8   17.50    3.90
   7  -3  -8   22.10    4.30
  -7  -3   8   32.40    4.70
  -7   3   8   16.40    5.60
   7   3  -8   17.70    3.70
   7   3  -8   22.70    4.00
   7   3  -8   21.50    3.90
  -7   3   8    8.90    6.30
  -6  -3   8  473.65   16.00
   6  -3  -8  466.75   13.90
  -6  -3   8  456.95   14.10
   6  -3  -8  464.45   15.40
  -6   3   8  454.15   17.40
   6   3  -8  473.15   15.10
   6   3  -8  464.55   15.00
   6   3  -8  450.25   14.80
   5  -3  -8  249.18    8.60
  -5  -3   8  242.38    8.80
   5  -3  -8  227.48   10.20
  -5  -3   8  242.38   10.50
   5   3  -8  228.48   10.20
   5   3  -8  228.88   10.00
  -5   3   8  214.38   12.60
  -5   3   8  232.08   12.20
  -4  -3   8  173.38   12.90
  -4  -3   8  191.98    9.20
  -4  -3   8  176.18    7.40
   4  -3  -8  180.58    7.00
  -4   3   8  180.18    8.30
  -4   3   8  174.98   10.00
  -4   3   8  169.18    9.90
  -3  -3   8 1160.48   34.70
   3  -3  -8 1134.89   29.10
  -3  -3   8 1139.79   29.60
  -3   3   8 1111.59   31.40
  -3   3   8 1133.09   29.60
  -3   3   8 1143.79   33.20
  -2  -3   8  612.54   20.70
  -2   3   8  577.34   18.00
  -2   3   8  573.64   16.30
  -2   3   8  572.44   19.10
  -1  -3   8   99.99    7.70
  -1   3   8  111.39    6.70
  -1   3   8  108.59    5.20
  -1   3   8  107.19    6.80
   0  -3   8  100.29    7.40
   0   3   8  103.49    7.00
   0   3   8  102.89    5.70
   0   3   8   94.19    5.90
   0   3   8   95.89    4.50
   1  -3   8  108.79    7.30
   1  -3   8  115.99    4.30
   1   3   8  107.69    4.40
   1   3   8  113.89    5.60
   1   3   8  102.89    5.30
   1   3   8  107.29    6.70
   2  -3   8  593.24   19.80
   2  -3   8  597.94   18.00
  -2  -3  -8  601.84   17.00
   2   3   8  619.14   15.60
   2   3   8  593.04   17.20
   2   3   8  588.04   19.40
   3  -3   8 1177.58   32.60
   3  -3   8 1080.19   35.50
   3   3   8 1160.28   33.60
   3   3   8 1135.59   28.50
   3   3   8 1177.18   30.60
   4  -3   8  185.38   12.50
   4   3   8  175.98    7.30
   4   3   8  170.18    5.90
  -5  -3  -8  233.38    8.90
   5   3   8  247.38    9.40
   5   3   8  243.58    7.60
  -6  -3  -8  469.65   14.50
   6   3   8  470.35   15.60
   6   3   8  460.15   13.00
  -7  -3  -8   18.00    3.00
   7   3   8   21.90    4.80
   7   3   8   33.00    5.20
  -8  -3  -8  142.89    7.50
   8   3   8  140.19    8.70
   8   3   8  127.89    7.80
   8   3   8  134.49    5.60
  -9  -3  -8  111.89    5.70
   9  -3   8  109.19    5.70
   9   3   8  113.79    6.90
   9   3   8  106.69    4.40
  10  -3   8   75.09    4.10
 -10  -3  -8   79.89    4.40
 -10  -3  -8   70.69    5.00
  10   3   8   74.99    4.70
  10   3   8   72.89    3.30
 -11  -3  -8  229.18    8.00
  11  -3   8  217.98    6.70
 -11  -3  -8  214.98    7.50
  11   3   8  232.58    6.50
  11  -4  -8   34.70    2.90
  11  -4  -8   32.00    3.50
 -11  -4   8   33.30    3.30
  11   4  -8   32.30    3.20
  10  -4  -8  132.59    5.90
 -10  -4   8  136.79    5.90
  10  -4  -8  121.49    5.50
  10   4  -8  139.09    5.60
  10   4  -8  131.29    5.10
  -9  -4   8   54.79    4.70
   9  -4  -8   60.49    6.60
   9  -4  -8   57.79    4.10
   9   4  -8   60.29    3.80
   9   4  -8   51.99    4.40
   8  -4  -8  237.28    8.40
   8  -4  -8  249.97   10.40
  -8  -4   8  242.18    9.60
  -8   4   8  229.98   11.30
   8   4  -8  237.18    9.10
   8   4  -8  241.88    9.40
   7  -4  -8  593.84   18.70
   7  -4  -8  605.34   17.40
  -7  -4   8  588.04   17.00
  -7  -4   8  625.04   19.30
   7   4  -8  595.24   17.50
   7   4  -8  597.74   17.70
   7   4  -8  578.74   17.60
  -7   4   8  587.24   21.00
   6  -4  -8   50.59    4.90
  -6  -4   8   57.59    6.50
  -6  -4   8   51.89    4.90
  -6   4   8   57.69    8.80
   6   4  -8   58.79    6.20
  -5  -4   8 1422.06   36.00
  -5  -4   8 1371.16   37.40
   5  -4  -8 1381.66   35.60
   5   4  -8 1346.87   36.00
   5   4  -8 1390.06   36.20
   5   4  -8 1392.46   36.50
  -5   4   8 1393.76   38.90
  -4  -4   8  994.40   26.30
  -4   4   8  972.40   29.60
  -4   4   8  955.20   31.30
   4   4  -8 1007.40   26.70
   4   4  -8  987.00   27.20
   3  -4  -8  172.28    6.80
  -3  -4   8  175.68    9.50
  -3  -4   8  169.48    7.40
  -3   4   8  164.48    9.50
  -3   4   8  169.58    8.00
  -3   4   8  153.88    9.60
   2  -4  -8  370.36   11.40
  -2  -4   8  391.76   16.90
  -2  -4   8  354.76   12.30
  -2   4   8  369.36   11.80
  -2   4   8  398.16   14.80
  -2   4   8  408.96   13.70
   1  -4  -8  272.27    9.20
  -1  -4   8  274.77   13.30
  -1   4   8  278.67   11.20
  -1   4   8  277.57    9.00
  -1   4   8  272.37   10.40
   0  -4   8 2813.62   72.89
   0   4   8 2786.02   67.39
   0   4   8 2724.13   73.79
   0   4   8 2760.32   68.39
   0   4   8 2763.42   70.29
   1  -4   8  286.27   13.10
   1   4   8  270.17    9.30
   1   4   8  276.47    8.40
   1   4   8  288.47   10.30
   1   4   8  280.57   12.80
  -2  -4  -8  396.16   12.80
   2  -4   8  418.76   15.90
   2   4   8  398.76   12.00
   2   4   8  393.66   11.20
   2   4   8  415.26   13.20
   2   4   8  414.66   16.10
  -3  -4  -8  179.88    7.10
   3   4   8  169.08    7.20
   3   4   8  166.48    5.70
  -4  -4  -8 1007.60   27.10
   4   4   8 1006.90   28.20
   4   4   8 1025.50   25.70
  -5  -4  -8 1430.96   37.30
   5   4   8 1454.25   35.80
   5   4   8 1419.56   38.70
  -6  -4  -8   48.10    5.00
   6   4   8   52.39    5.10
   6   4   8   50.39    6.80
  -7  -4  -8  624.74   18.30
   7   4   8  599.44   19.70
   7   4   8  586.54   17.90
  -8  -4  -8  243.18    9.10
   8   4   8  225.58   11.40
   8   4   8  244.08    9.60
   8   4   8  247.98    7.70
   9  -4   8   53.69    5.10
  -9  -4  -8   53.59    4.10
   9   4   8   54.69    3.00
   9   4   8   49.00    4.60
 -10  -4  -8  137.79    6.00
  10  -4   8  131.89    5.50
 -10  -4  -8  138.59    5.70
  10   4   8  136.09    4.70
  10   4   8  137.39    5.70
 -11  -4  -8   42.70    5.40
 -11  -4  -8   36.60    3.40
  11   4   8   33.30    2.60
  11   4   8   28.80    3.20
 -10  -5   8   -0.90    2.10
  10  -5  -8    0.10    3.20
  10  -5  -8    0.70    2.20
  10   5  -8   -0.70    1.90
  -9  -5   8  538.25   15.90
   9  -5  -8  533.25   15.80
   9  -5  -8  536.15   14.70
   9   5  -8  522.25   14.70
   9   5  -8  512.95   14.60
  -9   5   8  536.25   17.40
   8  -5  -8   78.59    7.00
  -8  -5   8   73.99    5.30
   8  -5  -8   71.19    4.60
   8   5  -8   82.19    5.80
   8   5  -8   82.99    5.80
  -8   5   8   82.79    7.70
  -7  -5   8  117.19    6.10
  -7  -5   8  126.09    8.20
   7  -5  -8  127.59    7.80
   7  -5  -8  122.49    6.70
   7   5  -8  138.49    7.00
   7   5  -8  134.09    7.10
  -7   5   8  118.59   10.80
  -6  -5   8  232.28   10.40
   6  -5  -8  230.08    8.90
  -6  -5   8  228.68    8.60
   6  -5  -8  226.58   10.00
  -6   5   8  243.18   13.20
   6   5  -8  222.28    9.20
   6   5  -8  233.58    9.40
   6   5  -8  216.78    9.30
   5  -5  -8   93.69    5.70
  -5  -5   8   83.29    7.20
  -5  -5   8   93.39    5.70
   5   5  -8   97.99    6.60
   5   5  -8   80.49    6.30
   5   5  -8   88.29    7.00
  -5   5   8  101.49    9.30
  -4  -5   8  339.57   11.30
  -4  -5   8  331.67   13.00
   4  -5  -8  336.77   10.90
   4   5  -8  334.97   12.40
  -4   5   8  320.97   16.10
  -4   5   8  351.56   14.30
   4   5  -8  349.37   11.80
   4   5  -8  360.16   12.50
   3  -5  -8  234.38    8.30
   3  -5  -8  207.98   15.30
  -3  -5   8  219.18    8.60
  -3  -5   8  225.08   10.90
  -3   5   8  240.08   11.20
  -3   5   8  214.08   12.30
   3   5  -8  215.58    8.90
   2  -5  -8 1616.94   39.50
  -2  -5   8 1543.65   41.50
  -2  -5   8 1605.74   40.10
   2  -5  -8 1491.85   42.50
  -2   5   8 1645.04   40.10
  -2   5   8 1614.04   45.20
   2   5  -8 1590.04   41.40
  -2   5   8 1471.65   42.90
   2   5  -8 1540.75   40.00
  -1  -5   8  168.98    9.50
  -1  -5   8  167.38   12.80
   1  -5  -8  170.48    6.80
  -1   5   8  170.98    9.40
  -1   5   8  175.88    7.30
  -1   5   8  164.28    8.50
   0  -5   8  257.77   14.30
   0  -5  -8  275.57    9.10
   0   5   8  264.87   10.00
   0   5   8  269.07   11.20
   0   5   8  275.27    8.90
   1  -5   8  150.58   11.70
  -1  -5  -8  161.38   10.40
   1   5   8  174.88    8.20
   1   5   8  171.98    7.40
   1   5   8  170.78    6.20
  -2  -5  -8 1526.45   41.00
  -2  -5  -8 1579.14   40.10
   2  -5   8 1549.94   47.20
   2   5   8 1580.44   38.90
   2   5   8 1587.34   41.90
  -3  -5  -8  233.58   11.00
   3   5   8  233.38    8.30
   3   5   8  228.88    7.30
   3   5   8  225.38    9.40
  -4  -5  -8  320.97   13.10
  -4  -5  -8  327.67   11.20
   4   5   8  342.17    9.80
   4   5   8  346.37   12.50
  -5  -5  -8  100.99   10.10
  -5  -5  -8   95.79    6.00
   5   5   8   88.99    4.20
   5   5   8   82.29    6.20
  -6  -5  -8  229.28    9.30
   6   5   8  231.68    7.50
   6   5   8  222.58   10.10
   6   5   8  209.98    9.80
  -7  -5  -8  122.59    7.10
   7   5   8  128.09    7.70
   7   5   8  132.29    5.30
   7   5   8  115.99    8.00
  -8  -5  -8   74.39    4.70
   8   5   8   77.79    3.60
   8   5   8   79.69    6.40
  -9  -5  -8  528.15   15.60
   9   5   8  543.15   15.00
 -10  -5  -8    3.40    2.00
  10  -5   8   -0.60    2.50
 -10  -5  -8    0.20    2.20
  10   5   8    0.60    1.90
  10   5   8    2.30    1.50
  10  -6  -8  118.89    6.60
 -10  -6   8  122.19    5.10
  10   6  -8  123.49    4.70
  -9  -6   8  134.49    5.90
   9  -6  -8  133.89    5.90
   9   6  -8  126.59    5.20
   9   6  -8  133.79    5.20
  -9   6   8  135.09    7.90
   8  -6  -8   92.89    4.80
  -8  -6   8   89.69    5.40
   8   6  -8   93.89    4.80
   8   6  -8   85.89    4.70
  -8   6   8   85.79    7.50
  -7  -6   8  814.52   23.20
  -7  -6   8  801.82   21.60
   7  -6  -8  818.22   22.30
   7  -6  -8  834.32   23.70
   7   6  -8  824.32   22.50
  -7   6   8  811.82   25.60
   7   6  -8  818.52   22.40
  -6  -6   8   69.49    7.10
   6  -6  -8   65.29    6.50
  -6  -6   8   68.09    5.10
   6  -6  -8   69.79    5.60
   6   6  -8   66.29    5.80
   6   6  -8   61.89    5.30
  -6   6   8   71.09    9.70
   6   6  -8   66.79    5.50
  -5  -6   8 1646.44   44.20
  -5  -6   8 1713.03   42.90
   5  -6  -8 1721.13   43.00
   5   6  -8 1699.63   43.40
  -5   6   8 1684.53   46.90
   5   6  -8 1661.13   43.00
   5   6  -8 1622.04   42.90
   4  -6  -8  309.07   17.90
   4  -6  -8  299.67   10.30
  -4  -6   8  302.37   10.30
  -4  -6   8  309.47   12.40
  -4   6   8  302.67   13.90
  -4   6   8  281.57   16.20
   4   6  -8  292.77   11.30
   3  -6  -8  650.23   17.90
  -3  -6   8  624.44   18.20
   3  -6  -8  623.54   21.70
  -3  -6   8  618.14   20.00
  -3   6   8  654.03   21.20
   3   6  -8  643.94   19.20
   3   6  -8  644.54   18.30
  -3   6   8  620.94   24.40
   3   6  -8  621.54   18.90
  -2  -6   8  102.29    6.40
   2  -6  -8  121.29    5.80
   2  -6  -8  117.39   10.00
   2   6  -8  123.29    8.00
   2   6  -8  104.99    9.20
  -2   6   8  116.99    9.70
   2   6  -8  121.09    6.70
  -2   6   8  112.69    8.40
   1  -6  -8  652.83   20.40
   1  -6  -8  685.33   18.20
  -1  -6   8  668.73   19.10
  -1   6   8  675.53   23.30
  -1   6   8  663.73   19.00
   1   6  -8  634.04   18.70
  -1   6   8  691.83   20.70
   1   6  -8  624.94   20.50
   1   6  -8  652.93   20.20
   0  -6  -8  168.68    7.00
   0  -6  -8  164.98    9.60
   0   6  -8  188.18    8.10
   0   6  -8  188.68   10.50
   0   6   8  172.78    7.50
   0   6   8  189.38    8.70
   0   6   8  171.98    9.70
  -1  -6  -8  653.83   18.10
  -1  -6  -8  641.34   20.00
   1   6   8  664.93   21.70
   1   6   8  666.73   18.00
  -1   6  -8  662.13   23.20
  -1   6  -8  658.43   18.80
  -1   6  -8  644.64   21.40
   1   6   8  680.63   19.40
  -2  -6  -8  109.99    8.00
   2   6   8  105.79    6.10
  -2   6  -8  101.69   11.80
   2   6   8  106.19    7.10
   2   6   8  109.29    5.10
  -3  -6  -8  646.64   19.40
  -3  -6  -8  643.34   18.60
   3   6   8  643.44   17.20
  -3   6  -8  593.24   21.70
   3   6   8  666.03   20.80
   3   6   8  614.64   18.20
  -4  -6  -8  298.47   11.00
  -4  -6  -8  299.07   12.10
   4   6   8  301.57    9.40
   4   6   8  293.47   10.40
   4   6   8  311.67   12.40
  -5  -6  -8 1683.83   43.10
  -5  -6  -8 1624.94   43.70
   5   6   8 1672.93   42.80
   5   6   8 1718.53   41.70
   5   6   8 1644.14   42.80
   5   6   8 1653.33   45.70
  -6  -6  -8   62.09    5.80
   6   6   8   64.59    7.20
   6   6   8   64.19    4.00
   6   6   8   61.69    5.30
   6   6   8   61.29    6.90
  -7  -6  -8  813.12   22.40
   7   6   8  809.32   21.00
   7   6   8  812.62   22.00
   7   6   8  770.42   27.80
   7   6   8  808.12   22.30
  -8  -6  -8   91.99    5.10
   8   6   8   89.79    5.10
   8   6   8   93.39    4.80
   8   6   8   95.19    4.00
  -9  -6  -8  132.09    5.90
   9   6   8  141.89    5.60
   9   6   8  144.19    6.00
 -10  -6  -8  135.29    5.30
  10   6   8  130.89    5.50
  -9  -7   8   39.70    4.20
   9  -7  -8   37.40    4.50
   9  -7  -8   46.20    3.70
   8  -7  -8   13.80    2.40
  -8  -7   8   17.60    2.80
   8  -7  -8   16.60    2.40
  -8   7   8   15.30    3.70
   8   7  -8   18.00    2.20
   8   7  -8   15.40    2.20
  -7  -7   8  176.78    7.70
  -7  -7   8  174.98    6.40
   7  -7  -8  189.38    7.00
   7  -7  -8  194.68    8.80
  -7   7   8  170.88    9.80
   7   7  -8  177.48    6.90
   7   7  -8  203.28    9.40
   6  -7  -8  160.38    6.60
  -6  -7   8  155.38    6.20
  -6  -7   8  163.78    7.60
  -6   7   8  160.48   10.30
   6   7  -8  160.98    7.70
   6   7  -8  170.08    7.30
  -5  -7   8  397.16   14.90
  -5  -7   8  415.36   12.80
   5  -7  -8  419.16   13.10
   5   7  -8  392.76   13.20
  -5   7   8  401.76   17.10
   5   7  -8  389.36   12.90
   5   7  -8  415.46   13.20
  -4  -7   8  476.15   14.30
   4  -7  -8  471.05   14.30
   4  -7  -8  465.95   20.10
  -4   7   8  462.75   18.30
   4   7  -8  468.85   14.90
   4   7  -8  446.86   14.80
   4   7  -8  481.95   14.40
  -3  -7   8  434.16   13.70
   3  -7  -8  461.55   13.60
   3  -7  -8  446.16   17.40
  -3   7   8  470.05   17.30
   3   7  -8  441.36   13.90
   3   7  -8  434.06   14.70
  -3   7   8  446.56   22.00
   3   7  -8  425.26   14.40
  -2  -7   8 1049.59   27.90
   2  -7  -8  943.01   31.00
   2  -7  -8 1079.59   27.60
   2   7  -8  995.40   30.50
   2   7  -8 1191.48   29.60
  -2   7   8 1017.40   31.20
   2   7  -8 1062.59   29.00
  -2   7   8 1002.10   34.80
  -2   7   8 1091.09   31.30
  -1  -7   8  349.67   11.70
   1  -7  -8  343.67   11.10
   1  -7  -8  340.47   13.60
   1   7  -8  366.76   11.80
  -1   7   8  364.46   14.20
  -1   7   8  321.97   17.10
  -1   7   8  360.26   16.70
   1   7  -8  354.96   13.50
   1   7  -8  349.37   12.90
   0  -7  -8   21.20    3.20
   0  -7   8   21.20    4.10
   0  -7  -8   22.90    4.50
   0   7   8   15.80    4.20
   0   7  -8   12.50    5.30
   0   7  -8   25.70    3.50
   0   7   8   23.90    4.20
   0   7  -8   16.20    4.90
  -1  -7  -8  344.67   13.10
   1   7   8  343.37   12.70
  -1   7  -8  355.46   14.40
   1   7   8  325.47   14.70
  -1   7  -8  343.27   13.90
  -2  -7  -8 1011.20   31.30
   2   7   8 1045.20   27.30
   2   7   8 1035.40   28.80
  -2   7  -8 1035.00   30.20
   2   7   8 1054.89   32.10
   2   7   8 1078.59   30.00
  -3  -7  -8  436.46   14.90
   3   7   8  441.26   14.30
  -3   7  -8  406.76   16.60
   3   7   8  434.36   12.80
  -4  -7  -8  477.35   15.30
  -4  -7  -8  468.65   15.60
   4   7   8  458.05   17.80
   4   7   8  446.76   15.50
   4   7   8  470.85   13.60
   4   7   8  484.95   15.10
  -5  -7  -8  400.26   13.50
  -5  -7  -8  388.26   14.10
   5   7   8  402.86   13.20
   5   7   8  400.56   11.90
   5   7   8  378.06   16.10
   5   7   8  399.66   13.70
  -6  -7  -8  142.19   10.30
  -6  -7  -8  152.68    7.00
   6   7   8  153.58   15.00
   6   7   8  162.18    8.50
   6   7   8  160.88    5.80
   6   7   8  155.98    6.80
  -7  -7  -8  180.88    7.30
   7   7   8  183.68    7.20
   7   7   8  185.28    7.20
   7   7   8  179.78    6.30
  -8  -7  -8   20.20    2.70
   8   7   8   17.00    2.50
   8   7   8   12.60    2.90
   8   7   8   13.30    2.90
  -9  -7  -8   42.30    3.40
   9   7   8   40.50    4.40
   8  -8  -8   57.49    3.60
   8  -8  -8   51.79    4.50
   8   8  -8   54.59    3.70
  -8   8   8   64.29    5.80
  -7  -8   8  451.45   12.30
   7  -8  -8  455.05   13.50
   7  -8  -8  449.06   12.80
   7   8  -8  447.36   12.60
  -7   8   8  453.05   15.70
   7   8  -8  452.25   12.90
   6  -8  -8   81.29    4.60
  -6  -8   8   82.99    4.10
   6  -8  -8   88.59    7.10
   6   8  -8   71.09    4.90
  -6   8   8   81.29    7.40
   6   8  -8   83.89    4.90
  -5  -8   8  176.38    6.40
   5  -8  -8  163.38    6.70
   5   8  -8  173.68    7.40
  -5   8   8  156.48    9.70
   5   8  -8  168.48    7.30
   5   8  -8  174.88    8.10
   4  -8  -8  317.47   10.20
   4  -8  -8  311.37   16.50
  -4  -8   8  321.67   10.10
  -4   8   8  310.37   13.50
   4   8  -8  318.37   11.10
   4   8  -8  317.57   11.60
   4   8  -8  312.37   10.80
  -3  -8   8  606.74   16.90
   3  -8  -8  572.34   19.90
   3  -8  -8  601.74   17.00
  -3   8   8  602.14   21.10
   3   8  -8  575.14   17.30
   3   8  -8  589.34   18.00
  -3   8   8  536.95   25.20
   3   8  -8  590.44   17.10
   2  -8  -8  778.02   24.40
  -2  -8   8  831.92   22.30
   2  -8  -8  816.32   22.20
  -2   8   8  781.72   25.20
  -2   8   8  787.02   30.70
   2   8  -8  827.72   22.90
  -2   8   8  880.51   26.30
   2   8  -8  804.22   23.60
   2   8  -8  828.02   22.60
   1  -8  -8  953.50   25.00
   1  -8  -8  922.91   27.10
  -1  -8   8  936.71   25.10
   1   8  -8  929.31   26.80
  -1   8   8  946.31   33.00
  -1   8   8  992.20   28.80
   1   8  -8  932.41   25.90
   1   8  -8  953.70   25.50
  -1   8   8  899.91   28.00
   0  -8  -8  401.06   12.30
   0  -8   8  401.96   12.40
   0  -8  -8  397.96   14.00
   0   8   8  394.36   15.30
   0   8   8  388.96   18.40
   0   8  -8  381.06   13.70
   0   8   8  372.36   15.90
   0   8  -8  396.66   14.80
  -1  -8  -8  982.40   26.60
   1  -8   8  926.71   24.80
   1   8   8  934.01   27.20
   1   8   8  901.81   31.00
   1   8   8  899.61   26.90
  -1   8  -8  913.51   27.20
  -2  -8  -8  814.32   23.50
   2   8   8  794.72   27.80
   2   8   8  787.82   23.80
   2   8   8  784.72   23.70
  -2   8  -8  822.02   24.70
  -3  -8  -8  582.94   18.20
   3   8   8  565.54   18.30
   3   8   8  554.04   21.80
  -3   8  -8  573.74   19.30
   3   8   8  596.44   18.30
  -4  -8  -8  323.27   12.00
   4   8   8  275.47   15.90
   4   8   8  328.77   12.30
   4   8   8  320.47   11.20
  -5  -8  -8  163.78    9.10
   5   8   8  158.78    7.30
   5   8   8  176.88    9.00
  -6  -8  -8   79.49    6.60
   6   8   8   77.19    5.70
   6   8   8   83.89    5.20
   7   8   8  462.15   13.30
   7   8   8  453.65   13.70
  -8  -8  -8   51.69    3.70
   8   8   8   61.19    5.50
   7  -9  -8    2.00    1.80
   7  -9  -8    6.20    2.70
  -7   9   8    7.30    3.60
   7   9  -8    7.30    2.90
   6  -9  -8   19.50    2.30
  -6  -9   8   20.00    2.70
   6  -9  -8   19.10    2.60
  -6   9   8   17.40    3.70
   6   9  -8   25.70    3.60
  -5  -9   8  486.35   13.50
   5  -9  -8  474.25   13.70
  -5   9   8  483.05   16.90
   5   9  -8  481.15   14.20
   5   9  -8  490.85   13.80
   4  -9  -8    9.80    2.30
  -4  -9   8    5.80    1.80
   4   9  -8    6.60    2.60
  -4   9   8    3.70    3.90
   3  -9  -8  252.57    8.70
  -3  -9   8  261.67    8.60
   3  -9  -8  247.18   12.50
   3   9  -8  269.77    9.60
  -3   9   8  273.07   11.80
   3   9  -8  256.27   10.60
   2  -9  -8  187.08   10.10
  -2  -9   8  181.88    6.70
   2  -9  -8  162.88    6.60
   2   9  -8  168.78    9.10
  -2   9   8  152.98   17.70
   2   9  -8  176.78    7.90
  -2   9   8  178.18    9.50
  -2   9   8  185.48   11.20
   1  -9  -8  234.78   10.50
   1  -9  -8  217.88    7.70
  -1  -9   8  217.38    7.70
   1   9  -8  206.98   10.50
  -1   9   8  212.18   10.20
  -1   9   8  224.38   11.50
  -1   9   8  187.48   16.90
   0  -9   8   73.19    4.30
   0  -9  -8   65.59    7.10
   0   9   8   75.59    6.70
   0   9  -8   54.29    7.90
   0   9   8   71.79    9.40
   0   9   8   74.19    9.20
   1  -9   8  222.68    7.50
  -1  -9  -8  222.98    9.90
   1   9   8  207.78    9.90
   1   9   8  179.68   16.20
   1   9   8  206.98   11.20
  -1   9  -8  221.88   11.00
  -2  -9  -8  187.58    9.00
   2  -9   8  187.68    6.90
   2   9   8  161.18   16.00
   2   9   8  172.28   10.00
  -2   9  -8  182.98   10.60
   2   9   8  169.18    8.50
  -3  -9  -8  268.87   10.70
   3   9   8  247.18   10.20
   3   9   8  263.77   11.60
  -4  -9  -8    5.00    3.30
   4   9   8   12.70    3.50
   4   9   8    4.10    3.20
  -5  -9  -8  493.95   14.60
  -5  -9  -8  472.85   14.70
   5   9   8  493.85   14.40
   5   9   8  472.45   14.90
  -6  -9  -8   22.30    3.50
  -6  -9  -8   20.40    2.90
   6   9   8   26.80    3.50
  -7  -9  -8    6.80    2.40
   7   9   8    2.40    4.50
   6 -10  -8   82.39    3.90
  -6 -10   8   89.89    4.20
   6  10  -8   80.59    4.60
  -6  10   8   96.29    6.30
   5 -10  -8  117.09    5.50
   5 -10  -8  121.69    5.00
  -5 -10   8  110.69    5.20
   5  10  -8  117.59    5.30
  -4 -10   8   51.89    3.10
   4 -10  -8   46.00    5.40
  -4  10   8   62.09    6.40
   4  10  -8   53.39    4.40
   3 -10  -8   27.00    2.80
  -3 -10   8   25.60    2.70
   3 -10  -8   20.80    4.40
   3  10  -8   22.80    3.10
  -3  10   8   25.10    4.00
   2 -10  -8  136.39    6.00
  -2 -10   8  148.79    5.50
   2 -10  -8  141.89    7.50
  -2  10   8  132.99    8.10
   2  10  -8  138.79    6.80
   1 -10  -8  134.59    8.00
  -1 -10   8  141.89    5.40
  -1  10   8  140.69    8.10
   1  10  -8  140.49    7.20
  -1  10   8  129.99    7.90
   0 -10   8  458.25   12.90
   0 -10  -8  461.75   16.80
   0  10   8  472.85   15.70
   0  10  -8  465.05   14.80
   0  10   8  447.16   14.80
   1 -10   8  132.69    5.30
  -1 -10  -8  136.79    9.10
  -1  10  -8  141.29    7.40
   1  10   8  137.29    7.70
   1  10   8  139.19    7.60
  -2 -10  -8  144.19    6.80
   2 -10   8  133.99    5.30
   2  10   8  135.19    7.60
  -2  10  -8  134.59    7.30
   2  10   8  122.09    7.40
   3 -10   8   30.40    3.80
  -3 -10  -8   26.20    4.00
   3  10   8   21.60    3.80
   3  10   8   27.90    3.90
   4 -10   8   45.60    5.60
  -4 -10  -8   52.69    4.40
   4  10   8   53.99    6.60
   4  10   8   49.20    5.70
  -5 -10  -8  121.19    5.80
   5  10   8  125.79    8.10
  -6 -10  -8   91.09    6.00
  -4 -11   8   82.29    3.30
   4 -11  -8   84.49    3.90
  -4  11   8   79.09    6.30
   4  11  -8   65.89    4.90
  -3 -11   8   59.39    3.00
  -3  11   8   46.30    6.40
   3  11  -8   56.59    4.60
  -2 -11   8  231.68    7.20
   2 -11  -8  240.58    8.90
   2  11  -8  221.28    8.20
  -2  11   8  229.08    9.70
   1 -11  -8  298.27   10.00
  -1 -11   8  289.67    8.40
   1  11  -8  277.87    9.70
  -1  11   8  280.67   12.30
   0 -11   8  111.49    4.40
   0 -11  -8  123.39    6.00
   0  11   8  118.19    8.60
   0  11   8  111.29    7.30
   0  11  -8  104.89    6.10
  -1 -11  -8  281.87    9.60
   1 -11   8  252.97    8.90
   1 -11   8  268.87    8.70
   1  11   8  286.17   10.80
   1  11   8  291.07   10.70
  -1  11  -8  285.17    9.70
  -2 -11  -8  225.08    8.00
   2 -11   8  211.98    6.80
   2  11   8  219.38    9.80
   3 -11   8   39.50    3.70
  -3 -11  -8   56.89    4.20
   3  11   8   56.99    8.90
  -4 -11  -8   71.99    4.60
  11   0  -9   -3.50    2.40
 -11   0   9   -5.20    3.10
 -10   0   9    0.50    2.80
  10   0  -9    1.70    2.40
  10   0  -9    4.60    2.40
   9   0  -9  224.98    9.50
   9   0  -9  227.18    9.00
  -9   0   9  213.38    9.10
   8   0  -9   64.99    6.80
  -8   0   9   90.19    7.80
   7   0  -9  934.81   26.50
  -7   0   9  947.51   27.60
  -6   0   9    0.80    3.30
   6   0  -9    0.70    3.70
  -6   0   9    1.90    3.00
   5   0  -9    2.40    4.50
  -5   0   9   -4.50    6.00
  -5   0   9    2.60    2.80
  -4   0   9    0.90    2.40
  -4   0   9   -0.90    3.60
  -3   0   9  200.48    7.80
  -3   0   9  208.58   11.00
  -2   0   9  200.58   10.10
  -2   0   9  199.98    7.90
  -2   0   9  198.88    8.60
   1   0  -9 1701.53   43.40
  -1   0   9 1666.73   45.40
  -1   0   9 1614.14   42.00
   0   0   9   -0.20    1.40
   0   0   9    0.70    1.20
   0   0  -9   -1.00    2.40
   1   0   9 1720.33   41.80
  -1   0  -9 1596.64   46.40
   1   0   9 1706.43   43.30
  -2   0  -9  187.78   13.90
   2   0   9  209.08    7.10
   2   0   9  209.48    8.40
   3   0   9  212.78    9.50
   3   0   9  216.68    7.90
  -3   0  -9  207.18    8.00
  -4   0  -9    0.50    2.40
   4   0   9    2.00    1.60
   4   0   9   -2.40    2.80
  -5   0  -9    2.30    4.70
  -5   0  -9    1.30    2.10
   5   0   9    1.00    1.80
   6   0   9    2.40    2.30
  -6   0  -9    0.80    4.50
  -6   0  -9    3.40    2.10
   7   0   9  942.51   25.20
   7   0   9  999.40   28.90
  -7   0  -9  973.50   32.10
  -7   0  -9  963.90   26.50
   8   0   9   80.19    5.20
  -8   0  -9   91.89    6.60
   8   0   9   79.89    7.60
  -8   0  -9   89.39    9.00
  -9   0  -9  219.08   11.60
  -9   0  -9  223.88    8.70
   9   0   9  248.18   14.10
   9   0   9  238.78    7.60
 -10   0  -9    0.60    4.10
  10   0   9    2.40    1.50
  11   0   9    2.50    1.30
 -11  -1   9    5.70    2.50
  11  -1  -9   -1.30    2.50
  11  -1  -9    4.80    2.60
  11   1  -9    4.80    2.60
  11   1  -9    0.70    2.40
 -10  -1   9   59.59    4.70
  10  -1  -9   54.69    4.20
  10  -1  -9   56.09    4.50
  10   1  -9   56.09    4.30
 -10   1   9   61.49    5.60
  10   1  -9   60.59    4.30
  -9  -1   9   11.10    2.80
   9  -1  -9    7.70    3.40
   9   1  -9    7.10    3.30
   9   1  -9    7.10    3.40
  -9   1   9    7.70    3.40
  -8  -1   9 1184.48   32.90
   8  -1  -9 1143.29   31.90
  -8   1   9 1218.08   33.00
   8   1  -9 1135.79   31.60
   8   1  -9 1156.98   30.80
  -7  -1   9   35.50    4.00
   7  -1  -9   32.30    4.60
  -7  -1   9   42.20    6.50
   7  -1  -9   43.40    4.90
  -7   1   9   36.80    5.30
   7   1  -9   34.00    4.50
   6  -1  -9  636.54   19.10
  -6  -1   9  659.23   20.10
  -6  -1   9  640.94   18.00
   6   1  -9  591.84   19.50
  -6   1   9  524.75   25.50
  -6   1   9  644.14   18.20
  -6   1   9  648.54   20.00
   6   1  -9  639.04   19.00
   5  -1  -9  406.66   12.30
   5  -1  -9  404.66   14.10
  -5  -1   9  421.26   14.70
  -5  -1   9  425.46   19.80
  -5  -1   9  409.96   13.00
  -5   1   9  428.26   13.10
  -5   1   9  439.16   15.30
  -5   1   9  367.16   25.70
   5   1  -9  415.46   14.40
  -4  -1   9  119.59   10.90
  -4  -1   9  116.89    6.10
  -4   1   9  122.49   10.40
  -4   1   9  138.49    6.50
  -3  -1   9  483.05   17.90
  -3  -1   9  459.45   14.00
   3  -1  -9  464.05   16.80
  -3   1   9  477.35   16.30
  -3   1   9  459.15   14.00
  -3   1   9  516.05   17.80
   2  -1  -9 2746.83   68.99
  -2  -1   9 2790.72   71.29
  -2   1   9 2646.14   68.39
  -2   1   9 2556.14   66.29
  -2   1   9 2834.92   70.99
  -1  -1   9 3319.67   83.19
   1  -1  -9 3299.57   81.49
  -1  -1   9 3150.38   78.39
  -1   1   9 3163.98   79.89
   0  -1   9 2936.81   74.39
   0  -1  -9 3048.09   78.59
   0  -1   9 3010.70   75.29
   0  -1   9 3247.68   79.29
   0   1   9 3088.99   75.49
   0   1   9 3103.99   77.49
   1  -1   9 3297.47   81.69
   1  -1   9 3388.86   80.49
  -1  -1  -9 3167.38   86.19
   1   1   9 3315.27   81.19
   1   1   9 3446.56   83.29
   2  -1   9 2810.62   70.89
   2  -1   9 2755.62   69.09
   2   1   9 2899.41   71.89
   2   1   9 2843.32   69.59
   3  -1   9  482.15   16.30
   3  -1   9  489.65   14.20
   3   1   9  470.45   16.30
   3   1   9  456.75   15.90
   4  -1   9  120.49    6.00
  -4  -1  -9  144.29    6.20
   4  -1   9  120.69    8.90
   4   1   9  117.99    6.00
  -4   1  -9  136.39    6.60
   4   1   9  129.69    8.90
   4   1   9  129.59    5.90
  -5  -1  -9  424.96   13.20
   5  -1   9  405.26   14.00
  -5   1  -9  424.76   13.50
   5   1   9  429.56   14.00
  -5   1  -9  427.26   16.10
   5   1   9  418.86   12.20
  -6  -1  -9  611.14   18.70
   6  -1   9  643.14   20.40
  -6  -1  -9  636.44   20.00
  -6   1  -9  650.73   18.90
   6   1   9  670.23   20.30
  -6   1  -9  673.33   21.10
   6   1   9  658.73   17.50
  -7  -1  -9   38.50    5.10
  -7  -1  -9   43.40    6.80
   7  -1   9   32.90    5.90
   7   1   9   40.30    5.40
  -7   1  -9   37.70    5.60
   7   1   9   38.10    3.90
   8  -1   9 1231.98   35.50
  -8  -1  -9 1172.58   32.40
   8  -1   9 1207.98   31.10
  -8  -1  -9 1231.28   33.80
  -8   1  -9 1216.58   34.10
   8   1   9 1211.28   35.00
  -8   1  -9 1213.98   32.70
   8   1   9 1232.18   31.10
  -9  -1  -9    2.40    2.30
  -9  -1  -9    7.50    4.30
   9  -1   9    5.30    2.00
  -9   1  -9   -2.20    5.50
   9   1   9    5.10    1.50
  10  -1   9   60.99    3.60
 -10  -1  -9   58.79    5.60
 -10  -1  -9   62.59    4.40
  10   1   9   62.99    3.30
  11  -1   9    3.00    1.40
 -11  -1  -9   -5.90    5.30
 -11  -2   9  167.18    6.30
  11   2  -9  147.29    5.80
 -10  -2   9    4.60    2.40
  10  -2  -9    6.60    2.50
  10   2  -9    6.50    2.30
  10   2  -9    3.90    2.30
  -9  -2   9   79.09    5.60
   9  -2  -9   86.89    6.80
   9   2  -9   83.99    6.10
   9   2  -9   84.59    6.10
   8  -2  -9  411.76   12.60
  -8  -2   9  388.96   14.70
   8  -2  -9  414.96   14.40
  -8   2   9  419.86   15.70
  -8   2   9  437.66   17.80
   8   2  -9  403.46   13.70
   8   2  -9  407.26   13.20
   7  -2  -9  162.38    8.70
   7  -2  -9  155.28    7.00
  -7  -2   9  153.48    7.30
  -7  -2   9  141.29    8.90
   7   2  -9  159.58    8.80
  -7   2   9  147.49    9.80
   7   2  -9  153.58    8.00
  -7   2   9  147.79   11.90
   7   2  -9  144.89    8.80
   6  -2  -9  365.36   11.40
   6  -2  -9  360.66   13.20
  -6  -2   9  360.46   11.90
  -6   2   9  362.06   15.80
  -6   2   9  354.56   14.00
   6   2  -9  368.76   12.90
   5  -2  -9   81.49    7.50
  -5  -2   9   90.29    7.50
  -5  -2   9   75.89    5.40
   5  -2  -9   81.39    5.50
  -5   2   9   92.99   10.80
   5   2  -9   90.29    7.40
  -5   2   9   84.59    6.30
  -5   2   9   81.09    8.10
   5   2  -9   90.19    8.50
   4  -2  -9  231.78    8.50
  -4  -2   9  228.68   14.70
  -4  -2   9  238.78    8.80
  -4   2   9  210.88   13.70
  -4   2   9  266.47   12.60
  -4   2   9  230.88    8.90
  -3  -2   9   85.29    5.60
  -3  -2   9   88.69    9.00
  -3   2   9   92.59    8.00
  -3   2   9   78.99    8.80
  -3   2   9   86.39    5.60
  -3   2   9   78.49    9.30
  -2  -2   9 1163.28   30.60
  -2  -2   9 1160.38   34.60
  -2   2   9 1187.78   32.70
  -2   2   9 1142.39   29.80
  -1  -2   9 3823.22   94.49
  -1   2   9 3647.33   91.29
  -1   2   9 3572.24   88.99
   0  -2   9  197.98    9.90
   0   2   9  203.98    8.00
   0   2   9  203.28    9.40
   0   2   9  190.18    6.70
   1  -2   9 3590.94   88.99
   1  -2   9 3809.02   94.29
   1  -2   9 3689.43   89.99
   1   2   9 3722.03   93.09
   1   2   9 3681.83   90.59
   2  -2   9 1228.78   31.90
   2  -2   9 1208.08   34.40
  -2  -2  -9 1163.78   30.90
   2  -2   9 1187.28   30.30
   2   2   9 1118.99   29.50
   2   2   9 1217.98   31.90
   2   2   9 1203.68   33.70
   3  -2   9   86.29    6.80
   3  -2   9   89.49    8.50
   3  -2   9   84.49    5.20
   3   2   9   98.59    4.80
   3   2   9   85.39    4.30
   3   2   9   92.99    6.80
  -4  -2  -9  244.28    8.80
   4  -2   9  249.38   12.90
   4  -2   9  237.48    9.00
   4   2   9  235.08    7.60
   4   2   9  236.28   12.10
   4   2   9  242.78    8.90
  -5  -2  -9   87.69    5.40
  -5   2  -9   83.09   10.60
   5   2   9   87.49    5.30
   6  -2   9  348.47   13.50
  -6  -2  -9  366.86   12.30
   6   2   9  371.66   10.90
   6   2   9  378.86   13.40
  -6   2  -9  396.66   15.70
  -7  -2  -9  156.58    7.60
   7  -2   9  145.29   13.60
   7   2   9  158.88    6.00
  -7   2  -9  156.38   11.90
   7   2   9  153.08    8.20
   8  -2   9  402.86   16.40
  -8  -2  -9  421.16   14.90
   8  -2   9  410.36   13.10
  -8  -2  -9  419.46   13.80
   8   2   9  405.06   15.50
   8   2   9  430.86   12.20
   9  -2   9   74.59    4.50
  -9  -2  -9   85.19    7.20
  -9  -2  -9   81.99    4.90
   9   2   9   82.49    3.90
 -10  -2  -9    5.60    2.90
 -10  -2  -9    7.30    2.30
  10  -2   9    8.40    1.80
  10   2   9    3.70    1.40
  11  -2   9  168.68    5.30
 -11  -2  -9  153.58    6.90
  11   2   9  173.88    5.30
 -11  -3   9  330.87    9.90
  11  -3  -9  319.57    9.50
  10  -3  -9   21.20    2.70
 -10  -3   9   29.20    3.60
  10   3  -9   29.10    3.40
  10   3  -9   23.50    2.60
   9  -3  -9  230.48   10.00
  -9  -3   9  237.18    9.10
   9   3  -9  227.98    7.90
   9   3  -9  227.88    9.70
   8  -3  -9  664.13   18.10
  -8  -3   9  648.44   21.40
   8  -3  -9  682.23   20.40
   8   3  -9  662.93   18.90
   8   3  -9  671.23   19.30
  -8   3   9  653.93   21.20
  -7  -3   9  387.06   12.30
   7  -3  -9  383.36   13.80
   7  -3  -9  384.06   12.20
  -7  -3   9  387.06   14.30
   7   3  -9  377.86   13.00
   7   3  -9  382.96   12.90
  -7   3   9  372.06   16.20
   7   3  -9  378.56   12.70
   6  -3  -9   67.59    7.10
  -6  -3   9   60.99    6.70
   6  -3  -9   60.59    5.30
  -6  -3   9   65.99    5.20
  -6   3   9   74.39    9.80
   6   3  -9   63.89    6.30
   6   3  -9   72.69    8.20
   6   3  -9   64.29    6.50
  -5  -3   9  305.37   12.30
   5  -3  -9  287.77   11.50
  -5  -3   9  308.97   10.50
   5  -3  -9  289.57    9.90
  -5   3   9  297.27   13.70
   5   3  -9  301.27   11.60
   5   3  -9  295.27   11.20
   4  -3  -9   41.30    5.00
   4  -3  -9   54.79    4.90
  -4   3   9   49.10    6.90
   4   3  -9   48.20    5.20
  -4   3   9   50.79    5.80
   4   3  -9   51.69    7.60
  -4   3   9   39.20    5.90
  -3  -3   9   87.49   11.20
   3  -3  -9   89.99    5.60
  -3  -3   9   89.39    5.80
  -3   3   9   91.69    5.80
  -3   3   9   90.99    7.10
  -3   3   9  100.39    8.40
  -2  -3   9   81.19    8.90
  -2  -3   9   76.69    6.70
  -2   3   9   88.39    5.20
  -2   3   9   77.99    7.70
  -2   3   9   93.09    6.40
  -1  -3   9  406.06   16.40
  -1   3   9  368.16   15.40
  -1   3   9  419.46   12.00
  -1   3   9  433.46   13.60
   0  -3   9 2491.85   65.79
   0   3   9 2484.65   61.09
   0   3   9 2425.66   60.09
   0   3   9 2467.35   65.79
   1  -3   9  444.36   16.80
   1   3   9  410.46   12.60
   1   3   9  413.06   11.80
   1   3   9  450.45   13.70
   1   3   9  442.66   16.10
  -2  -3  -9   91.69    5.70
   2  -3   9   85.39    5.70
   2  -3   9   86.79    5.00
   2  -3   9   96.29    8.50
   2   3   9   92.49    4.80
   2   3   9   86.49    3.80
   2   3   9   83.19    6.70
   3  -3   9   84.29    9.60
   3  -3   9   88.49    8.30
  -3  -3  -9   94.39    5.50
   3  -3   9   87.49    5.80
   3   3   9   96.99    5.00
   3   3   9   89.49    7.90
   3   3   9   97.09    4.00
   4  -3   9   52.09   10.70
  -4  -3  -9   42.50    5.70
   4   3   9   47.80    4.00
   4   3   9   47.20    3.20
  -5  -3  -9  300.37   10.70
   5   3   9  310.57   11.40
   5   3   9  312.37    9.30
  -5   3  -9  318.57   15.70
  -6  -3  -9   67.69    5.40
  -6   3  -9   86.59   12.40
   6   3   9   68.59    3.90
   6   3   9   62.99    5.60
  -7  -3  -9  399.96   13.40
   7   3   9  393.76   14.70
   7   3   9  403.66   11.70
   8  -3   9  609.94   22.40
  -8  -3  -9  630.04   19.60
   8   3   9  666.63   21.40
   8   3   9  659.13   17.90
  -9  -3  -9  250.37   10.40
  -9  -3  -9  238.68    8.80
   9  -3   9  241.88    8.30
  10  -3   9   25.20    2.60
 -10  -3  -9   29.00    4.10
 -10  -3  -9   25.20    3.40
  10   3   9   27.20    2.30
 -11  -3  -9  315.87    9.80
  11  -3   9  314.67    9.00
  11   3   9  328.57    8.70
  10  -4  -9   28.60    2.90
 -10  -4   9   31.90    3.50
  10   4  -9   29.20    2.70
  10   4  -9   29.60    3.50
   9  -4  -9  196.58    6.90
   9  -4  -9  210.48    8.20
  -9  -4   9  199.78    8.00
   9   4  -9  186.28    6.90
   9   4  -9  189.28    7.00
   8  -4  -9  284.37   11.40
   8  -4  -9  286.77    9.30
  -8  -4   9  284.17   10.70
   8   4  -9  291.17   10.10
   8   4  -9  289.57   10.30
  -8   4   9  281.47   12.40
  -7  -4   9 1405.96   38.50
   7  -4  -9 1437.06   36.40
   7  -4  -9 1386.16   37.70
  -7  -4   9 1410.66   36.30
   7   4  -9 1421.56   36.90
  -7   4   9 1440.06   40.40
   7   4  -9 1388.26   36.50
   7   4  -9 1400.36   36.80
   6  -4  -9  947.11   25.30
   6  -4  -9  909.81   26.50
  -6  -4   9  929.41   27.30
  -6  -4   9  944.71   25.50
  -6   4   9  964.00   29.30
   6   4  -9  942.91   26.00
   6   4  -9  945.61   26.00
   5  -4  -9  486.95   14.30
  -5  -4   9  472.75   14.60
   5  -4  -9  470.85   15.70
  -5  -4   9  463.65   16.20
   5   4  -9  481.85   15.10
   5   4  -9  473.55   15.40
  -5   4   9  477.85   17.90
   4  -4  -9   17.40    9.60
   4  -4  -9   18.10    2.90
  -4  -4   9   16.90    3.00
  -4  -4   9   15.20    4.10
   4   4  -9   20.50    4.00
   4   4  -9   23.90    4.40
  -4   4   9   12.40    4.60
  -4   4   9   15.30    4.40
  -4   4   9   12.20    4.80
  -3  -4   9   49.70    5.20
   3  -4  -9   49.70    4.90
  -3  -4   9   50.89    7.30
   3   4  -9   44.70    5.60
  -3   4   9   47.40    7.40
   3   4  -9   49.10    6.50
  -3   4   9   44.10    5.70
  -3   4   9   49.70    7.00
  -2  -4   9  607.94   30.50
  -2  -4   9  561.04   16.70
   2  -4  -9  569.64   16.00
  -2   4   9  557.74   19.80
  -2   4   9  562.04   16.30
  -2   4   9  561.94   18.10
   1  -4  -9   75.79    6.30
  -1  -4   9   81.79   11.00
  -1   4   9   67.59    6.10
  -1   4   9   70.89    4.70
  -1   4   9   68.29    5.70
   0  -4   9    1.50    3.90
   0   4   9    0.80    3.60
   0   4   9    1.50    2.40
   0   4   9    0.00    1.90
   0   4   9   -0.10    1.80
   1  -4   9   60.59    9.70
   1   4   9   73.89    5.00
   1   4   9   69.99    4.90
   1   4   9   60.59    7.90
   1   4   9   69.99    3.80
   2  -4   9  556.04   21.40
   2   4   9  653.53   25.50
   2   4   9  589.34   15.80
   2   4   9  586.74   16.60
   2   4   9  584.14   18.00
  -3  -4  -9   52.09    6.90
  -3  -4  -9   57.59    5.00
   3   4   9   49.40    4.10
  -4  -4  -9   15.30    6.40
  -4  -4  -9   16.40    2.90
   4   4   9   16.70    3.40
  -4   4  -9   22.10    8.00
   4   4   9   18.20    2.50
  -5  -4  -9  492.75   15.10
   5   4   9  481.45   13.40
   5   4   9  485.05   16.20
  -6  -4  -9  997.10   27.30
   6   4   9 1026.40   30.90
   6   4   9  951.60   25.50
  -7  -4  -9 1405.46   37.30
   7   4   9 1437.96   35.60
   7   4   9 1392.96   39.40
  -8  -4  -9  274.97    9.80
   8   4   9  268.37   13.80
   8   4   9  290.87    8.60
  -9  -4  -9  196.28    8.00
  -9  -4  -9  192.78    7.60
   9   4   9  199.68    6.30
 -10  -4  -9   23.40    3.20
  10  -4   9   30.00    4.10
 -10  -4  -9   35.30    3.70
  10   4   9   30.60    2.30
  10  -5  -9   27.60    3.60
 -10  -5   9   34.70    3.50
  10   5  -9   31.60    3.80
  -9  -5   9   88.39    5.00
   9  -5  -9   88.59    5.20
   9   5  -9   87.19    4.50
   9   5  -9   98.79    4.50
   8  -5  -9  299.57    9.50
   8  -5  -9  311.87   11.60
  -8  -5   9  296.67   10.80
  -8   5   9  306.37   12.60
   8   5  -9  305.97   10.40
   7  -5  -9  120.09    7.60
  -7  -5   9  100.09    5.10
  -7  -5   9  101.19    6.50
   7  -5  -9  113.89    5.60
   7   5  -9  111.29    6.30
   7   5  -9  114.79    6.50
  -7   5   9  129.69    9.10
   7   5  -9  111.39    6.80
  -6  -5   9  764.82   21.10
  -6  -5   9  757.52   22.80
   6  -5  -9  749.13   21.00
   6  -5  -9  732.53   22.30
  -6   5   9  775.22   25.40
   6   5  -9  757.62   21.60
   6   5  -9  748.43   21.40
   6   5  -9  745.83   21.30
  -5  -5   9  206.68    8.40
   5  -5  -9  197.78    8.10
  -5  -5   9  210.88   10.20
  -5   5   9  204.98   12.30
   5   5  -9  198.08    9.60
   5   5  -9  198.58    8.70
   5   5  -9  206.68    8.90
  -4  -5   9   43.30    7.10
   4  -5  -9   48.90    4.90
  -4  -5   9   48.30    4.90
   4  -5  -9   36.30    9.20
  -4   5   9   31.30    5.70
   4   5  -9   46.20    6.10
   4   5  -9   35.80    4.10
  -4   5   9   41.70    6.00
  -3  -5   9  179.98   10.20
  -3  -5   9  182.38    7.90
   3  -5  -9  170.58   13.60
   3  -5  -9  178.28    7.40
  -3   5   9  189.48   11.60
   3   5  -9  187.68    9.10
  -3   5   9  181.78   10.30
   3   5  -9  178.78    8.10
  -2  -5   9  341.27   11.60
   2  -5  -9  323.97   14.70
   2  -5  -9  321.87   10.50
  -2  -5   9  318.97   13.70
  -2   5   9  318.97   14.60
   2   5  -9  322.87   11.20
  -2   5   9  315.47   11.30
   2   5  -9  326.17   12.80
  -2   5   9  337.47   13.30
  -1  -5   9  133.69    8.90
   1  -5  -9  127.19   10.10
   1  -5  -9  121.69    6.70
   1   5  -9  136.39    7.40
   1   5  -9  132.69    9.40
  -1   5   9  136.49    6.50
  -1   5   9  140.79    8.70
  -1   5   9  140.99    8.00
   0  -5  -9    1.40    4.70
   0   5  -9   -4.10    3.90
   0   5   9    3.90    2.20
   0   5   9   -0.60    2.40
   0   5   9    4.40    4.50
   0   5  -9    4.90    5.10
   1  -5   9  140.69   14.10
  -1  -5  -9  135.49    9.10
   1   5   9  139.69    7.50
   1   5   9  150.68    6.90
  -1   5  -9  129.39   10.80
  -1   5  -9  139.39    8.60
  -2  -5  -9  313.57   12.60
   2   5   9  326.97   10.70
   2   5   9  325.37   12.20
  -2   5  -9  340.77   14.80
   2   5   9  314.27    9.60
  -2   5  -9  308.07   12.60
  -3  -5  -9  186.98    8.00
  -3  -5  -9  167.18    9.70
   3   5   9  173.58    6.20
  -3   5  -9  159.78   12.70
   3   5   9  185.98    7.40
   3   5   9  186.58    8.60
  -4  -5  -9   43.00    5.10
  -4  -5  -9   45.70    5.90
   4   5   9   42.40    4.80
  -5  -5  -9  203.68    8.50
  -5  -5  -9  191.38   12.90
   5   5   9  203.18    6.90
   5   5   9  198.78    9.60
  -6  -5  -9  770.02   21.80
   6   5   9  728.63   23.60
   6   5   9  780.72   20.10
  -7  -5  -9  122.99    6.10
   7   5   9  115.49    8.90
   7   5   9  122.89    4.70
  -8  -5  -9  301.77   10.30
   8   5   9  300.87    8.90
  -9  -5  -9   93.09    5.00
  -9  -5  -9  101.49    5.40
   9   5   9   96.99    3.90
 -10  -5  -9   38.10    3.40
  10   5   9   39.30    2.80
  10   5   9   36.20    3.30
   9  -6  -9    8.20    2.20
  -9  -6   9    1.90    2.50
   9   6  -9   -0.20    2.30
   9   6  -9    4.40    2.00
   8  -6  -9   23.20    2.70
  -8  -6   9   22.00    2.80
   8  -6  -9   24.90    3.00
   8   6  -9   27.50    3.30
  -8   6   9   28.80    4.40
   8   6  -9   30.00    3.70
  -7  -6   9   72.19    4.20
   7  -6  -9   75.19    4.70
  -7  -6   9   76.59    5.60
   7  -6  -9   81.29    6.80
  -7   6   9   72.09    7.70
   7   6  -9   73.49    5.40
   7   6  -9   76.29    6.10
  -6  -6   9  577.34   18.90
   6  -6  -9  597.84   18.50
   6   6  -9  605.44   17.50
   6   6  -9  596.94   17.60
   6   6  -9  608.04   17.80
  -5  -6   9  415.56   14.70
   5  -6  -9  410.76   12.80
  -5  -6   9  412.36   12.90
   5   6  -9  392.86   12.90
  -5   6   9  382.46   16.70
   5   6  -9  385.96   13.40
   5   6  -9  392.26   13.30
  -4  -6   9  129.29    9.00
   4  -6  -9  128.49    6.60
  -4  -6   9  129.79    6.70
  -4   6   9  140.89   10.20
   4   6  -9  137.29    6.90
   4   6  -9  137.59    7.50
   4   6  -9  113.89   12.70
   3  -6  -9  268.27    9.50
  -3  -6   9  270.77   12.80
  -3  -6   9  272.47    9.90
   3  -6  -9  256.17   14.40
  -3   6   9  288.27   12.90
   3   6  -9  282.27   10.90
   3   6  -9  272.17   13.80
  -3   6   9  254.37   15.30
   3   6  -9  265.47   10.00
  -2  -6   9  774.62   22.10
   2  -6  -9  797.12   24.50
   2  -6  -9  796.92   21.60
  -2   6   9  793.82   24.70
   2   6  -9  823.32   23.20
   2   6  -9  808.22   22.10
  -2   6   9  796.52   28.10
   1  -6  -9   81.99    8.60
  -1  -6   9   90.29    7.20
   1  -6  -9   88.99    5.80
  -1   6   9   84.79    7.30
   1   6  -9   86.79    6.40
   1   6  -9   94.99    7.80
  -1   6   9   96.49    6.90
  -1   6   9   80.89    8.20
   0  -6  -9  147.79    9.00
   0   6   9  150.08    9.50
   0   6   9  155.48    7.00
   0   6  -9  153.58    9.50
   0   6  -9  147.69    7.40
   0   6   9  150.08    8.20
  -1  -6  -9   93.59    7.70
  -1   6  -9   67.49    9.20
   1   6   9   89.09    5.10
   1   6   9  101.49    7.50
   1   6   9   95.29    6.20
  -1   6  -9   95.49    6.70
  -2  -6  -9  771.32   23.00
   2   6   9  791.72   21.00
   2   6   9  790.22   24.90
  -2   6  -9  775.52   24.40
   2   6   9  812.32   22.40
  -3  -6  -9  263.87   11.30
   3   6   9  254.67   11.50
   3   6   9  267.37    9.90
   3   6   9  266.17    8.60
  -4  -6  -9  123.29    8.90
  -4  -6  -9  144.29    7.50
   4   6   9  127.59    5.50
   4   6   9  131.79    6.80
  -5  -6  -9  396.86   13.60
  -5  -6  -9  404.26   15.40
   5   6   9  412.06   12.00
   5   6   9  408.76   15.70
  -7  -6  -9   78.09    5.10
   7   6   9   81.89    4.60
   7   6   9   77.99    3.70
  -8  -6  -9   28.50    3.70
   8   6   9   25.70    2.70
   8   6   9   34.60    3.30
  -9  -6  -9    2.50    2.00
  -9  -6  -9    0.40    2.90
   9   6   9    0.80    2.20
   9   6   9    4.10    1.80
   9  -7  -9  246.58    7.90
  -9  -7   9  233.68    8.10
   8  -7  -9   10.20    2.30
   8  -7  -9    7.40    2.80
  -8  -7   9   10.00    2.70
   8   7  -9    2.50    2.30
  -8   7   9   11.90    3.80
   8   7  -9    9.60    1.90
   7  -7  -9  232.18    7.90
   7  -7  -9  235.38    8.80
  -7  -7   9  224.98    8.70
  -7  -7   9  235.78    7.40
   7   7  -9  224.88    7.90
   7   7  -9  228.18    7.80
  -7   7   9  238.08   10.90
  -6  -7   9  610.74   18.20
   6  -7  -9  625.64   18.80
   6  -7  -9  599.84   17.20
  -6  -7   9  635.74   17.20
   6   7  -9  633.14   18.00
  -6   7   9  614.24   20.90
   6   7  -9  612.94   17.90
   6   7  -9  620.54   17.70
   5  -7  -9   94.69    5.10
  -5  -7   9   87.09    7.00
  -5  -7   9  100.99    7.40
  -5   7   9   90.39    8.20
   5   7  -9   92.99    5.80
   5   7  -9   92.69    6.00
   5   7  -9  102.49    7.10
  -4  -7   9  291.67   10.20
   4  -7  -9  279.77   15.80
   4  -7  -9  284.87   10.10
   4   7  -9  283.97   11.20
  -4   7   9  278.47   14.00
   4   7  -9  280.37   10.60
   4   7  -9  277.27   10.10
   3  -7  -9   93.39   10.50
  -3  -7   9  101.39    6.10
   3  -7  -9   87.89    5.90
  -3   7   9   86.49   13.00
  -3   7   9   92.09    9.10
   3   7  -9   96.49    8.30
   3   7  -9  102.69    6.60
   3   7  -9  100.99    6.00
   2  -7  -9   15.00    4.80
  -2  -7   9    6.80    2.90
   2  -7  -9    9.50    3.20
  -2   7   9   11.40    4.60
   2   7  -9    7.70    3.50
  -2   7   9   12.80    5.90
   2   7  -9   13.60    3.00
   1  -7  -9  253.97    9.20
  -1  -7   9  243.08    9.70
   1  -7  -9  254.27   11.70
   1   7  -9  241.18   12.40
  -1   7   9  251.67   14.40
  -1   7   9  254.17   12.10
   1   7  -9  253.17    9.50
   0  -7  -9  618.84   19.50
   0  -7   9  606.24   18.10
   0   7  -9  514.45   19.80
   0   7   9  618.44   19.70
   0   7   9  616.94   23.00
   0   7  -9  647.04   19.20
   0   7  -9  632.64   18.00
  -1  -7  -9  259.97   11.00
   1   7   9  251.97   10.70
   1   7   9  244.78    9.60
   1   7   9  242.38   12.90
  -1   7  -9  238.78   11.90
  -2  -7  -9   12.70    3.80
   2   7   9   14.10    4.80
   2   7   9   24.20    3.40
   2   7   9   12.80    3.40
  -3  -7  -9   91.09    7.40
   3   7   9   97.59    6.50
   3   7   9   91.29    5.40
   3   7   9   90.59    9.00
  -4  -7  -9  270.37   11.50
   4   7   9  259.47   13.20
   4   7   9  268.77   10.50
   4   7   9  273.17    9.10
  -5  -7  -9  104.09    8.50
   5   7   9   96.09    5.70
   5   7   9   79.99   10.20
   5   7   9   98.19    4.50
   6   7   9  626.74   18.00
   6   7   9  613.84   16.70
   7   7   9  220.58    7.10
   7   7   9  225.08    8.10
  -8  -7  -9    7.20    2.10
   8   7   9    9.60    2.80
   8   7   9    4.90    2.20
  -9  -7  -9  230.68    7.60
   9   7   9  218.58    7.70
   8  -8  -9  376.46   10.70
   8   8  -9  336.17   10.30
  -8   8   9  377.26   12.60
  -7  -8   9   85.39    5.20
   7  -8  -9   86.89    4.70
   7  -8  -9   90.99    5.10
   7   8  -9   98.79    4.70
   7   8  -9   88.09    4.10
  -7   8   9   90.09    6.80
  -6  -8   9   52.79    3.30
   6  -8  -9   43.90    4.20
   6  -8  -9   43.80    4.20
  -6   8   9   33.60    4.50
   6   8  -9   44.00    3.50
   6   8  -9   42.10    4.30
   5  -8  -9  216.08    7.80
  -5  -8   9  213.08    7.50
  -5   8   9  219.08   10.90
   5   8  -9  221.38    8.40
   5   8  -9  222.88    8.30
   4  -8  -9   33.10    7.80
  -4  -8   9   30.00    3.30
   4   8  -9   24.20    4.40
   4   8  -9   28.10    3.40
   4   8  -9   30.20    4.30
  -4   8   9   23.80    4.70
   3  -8  -9  491.75   17.80
   3   8  -9  459.25   15.60
   3   8  -9  493.35   15.00
   3   8  -9  490.95   14.60
  -3   8   9  438.96   23.20
   2  -8  -9  381.66   15.00
  -2  -8   9  398.06   12.40
   2  -8  -9  388.16   12.40
   2   8  -9  391.86   12.90
   2   8  -9  380.36   12.40
   2   8  -9  368.76   13.90
  -2   8   9  374.06   19.90
  -1  -8   9  578.34   16.40
   1  -8  -9  548.65   16.20
   1  -8  -9  535.95   18.30
  -1   8   9  548.65   19.60
   1   8  -9  582.14   17.20
  -1   8   9  543.75   23.70
   1   8  -9  544.55   18.40
   1   8  -9  574.64   16.60
   0  -8  -9  385.36   14.30
   0  -8   9  383.26   12.50
   0   8   9  383.26   15.30
   0   8  -9  389.16   13.50
   0   8   9  391.56   19.00
   0   8  -9  380.16   14.90
   1  -8   9  538.45   16.00
  -1  -8  -9  552.34   17.70
   1   8   9  554.04   18.40
  -1   8  -9  536.15   18.60
   1   8   9  530.45   22.10
  -2  -8  -9  397.06   14.00
  -2   8  -9  383.86   15.50
   2   8   9  360.16   17.40
   2   8   9  385.56   14.30
  -3  -8  -9  461.25   15.80
   3   8   9  474.55   20.40
  -4  -8  -9   28.10    4.80
  -4  -8  -9   24.30    5.30
   4   8   9   26.00    7.20
   4   8   9   27.80    3.50
  -5  -8  -9  221.78   10.60
   5   8   9  214.98    8.50
  -6  -8  -9   41.60    4.50
  -6  -8  -9   47.50    6.50
   6   8   9   41.90    4.40
  -7  -8  -9   83.79    4.80
   7   8   9   79.69    5.00
  -8  -8  -9  389.16   11.10
   8   8   9  348.97   11.40
   7  -9  -9    8.20    1.80
   7   9  -9   10.40    3.90
  -7   9   9    5.90    3.40
   6  -9  -9  120.19    6.00
   6  -9  -9  119.39    5.10
  -6   9   9  126.89    7.60
   6   9  -9  119.29    5.60
   5  -9  -9  169.98    6.70
  -5  -9   9  172.58    6.00
   5  -9  -9  177.68    6.60
  -5   9   9  166.58    8.90
   5   9  -9  166.48    6.90
   5   9  -9  173.98    6.30
   4  -9  -9  126.99    5.90
  -4  -9   9  135.79    5.30
   4   9  -9  134.09    7.30
  -4   9   9  126.29    8.20
   4   9  -9  137.39    6.50
   3  -9  -9  278.97    9.30
  -3  -9   9  300.47    9.30
  -3   9   9  277.77   12.10
   3   9  -9  301.97   10.10
   2  -9  -9  118.39    9.10
   2  -9  -9   89.89    5.50
  -2  -9   9  100.89    4.90
   2   9  -9  112.39    8.20
   2   9  -9  105.89    6.30
  -2   9   9  104.99    7.60
  -1  -9   9  135.39    5.70
   1  -9  -9  147.79    9.10
  -1   9   9  141.59    8.20
   1   9  -9  145.29    7.60
   1   9  -9  139.39    9.20
   0  -9   9   10.50    2.20
   0  -9  -9   16.70    4.40
   0   9   9   11.60    3.70
   0   9  -9   19.40    5.40
   0   9   9   -0.40    9.40
   1  -9   9  134.89    5.80
  -1  -9  -9  136.09    8.40
   1   9   9  139.19    7.80
  -1   9  -9  150.18    9.80
  -2  -9  -9  108.39    7.40
   2  -9   9  105.69    5.60
   2   9   9  106.39    6.80
  -2   9  -9   89.79    9.30
  -3  -9  -9  289.47   11.60
   3   9   9  276.97   10.70
  -4  -9  -9  137.09    6.90
   4   9   9  133.49    7.00
  -5  -9  -9  165.98    7.80
  -5  -9  -9  169.78    7.50
   5   9   9  171.58    7.60
  -6  -9  -9  119.29    6.80
  -6  -9  -9  117.99    5.80
   6   9   9  120.39    6.50
  -7  -9  -9   11.80    2.60
   5 -10  -9    0.60    1.80
  -5  10   9   -5.00    3.40
   5  10  -9    7.50    3.10
   4 -10  -9  137.99    5.40
  -4 -10   9  129.69    4.80
  -4  10   9  139.99    7.70
   4  10  -9  120.89    6.30
  -3 -10   9   17.80    2.60
   3 -10  -9   23.40    4.30
  -3  10   9   30.40    4.10
   3  10  -9   21.50    3.20
   2 -10  -9   92.89    6.50
  -2 -10   9   97.09    4.30
  -2  10   9  101.29    7.00
   2  10  -9   98.59    6.20
  -1 -10   9    6.90    1.70
   1 -10  -9   -0.40    3.10
  -1  10   9    2.30    3.40
   1  10  -9    3.80    3.50
   0 -10  -9  142.59    7.10
   0 -10   9  140.09    5.30
   0  10  -9  129.39    7.30
   0  10   9  135.69    7.50
   1 -10   9    1.90    1.80
  -1 -10  -9    3.10    2.70
  -1  10  -9    2.30    3.90
   1  10   9   -0.70    3.30
  -2 -10  -9  100.09    5.70
   2 -10   9   94.29    4.60
   2  10   9   97.69    6.80
   3 -10   9   18.90    2.70
  -3 -10  -9   20.00    2.80
   3  10   9   19.90    3.60
  -4 -10  -9  145.69    6.40
   4  10   9  140.19    7.50
  -5 -10  -9    5.50    2.60
   5  10   9   -2.90    4.30
  -3 -11   9  422.86   11.40
   3 -11  -9  427.46   11.70
  -3  11   9  393.36   13.50
   3  11  -9  451.85   14.90
  -2 -11   9   32.00    2.60
   2 -11  -9   30.30    3.00
   2 -11  -9   34.90    5.20
   2  11  -9   31.10    3.70
  -2  11   9   27.20    4.10
   1 -11  -9   60.49    4.80
  -1 -11   9   51.99    3.00
   1  11  -9   49.50    6.20
  -1  11   9   51.49    6.40
   0 -11  -9   10.50    2.50
   0 -11   9    8.80    1.70
   0  11   9    6.70    4.00
  -1 -11  -9   55.69    4.30
   1 -11   9   46.70    4.50
   1 -11   9   47.60    3.20
   1  11   9   60.49    6.40
  -2 -11  -9   28.90    3.70
   2 -11   9   36.20    3.20
   2  11   9   28.60    4.40
  -3 -11  -9  426.36   12.80
   3  11   9  437.36   17.70
  11   0 -10   19.60    2.30
 -11   0  10   19.10    3.60
  10   0 -10   -0.70    2.20
 -10   0  10    0.10    2.70
  -9   0  10  634.54   18.80
   9   0 -10  608.44   18.50
   8   0 -10  234.28   10.00
  -8   0  10  243.28   11.30
   7   0 -10  304.97   11.90
  -7   0  10  303.87   12.70
  -6   0  10  404.86   15.30
   6   0 -10  409.86   14.30
  -6   0  10  429.76   13.50
   5   0 -10   73.49   10.60
  -5   0  10   66.79    5.50
   5   0 -10   57.59    7.10
  -5   0  10   70.59    7.00
  -4   0  10   64.89   11.20
   4   0 -10   76.79    8.20
  -4   0  10   77.69    5.40
  -3   0  10   29.10    4.30
  -2   0  10 1462.25   38.00
  -2   0  10 1500.65   39.60
  -2   0  10 1558.14   43.10
  -1   0  10  580.14   17.20
  -1   0  10  590.34   20.60
   0   0 -10 3147.69   82.09
   0   0  10 3137.49   79.89
   0   0  10 3292.67   78.29
   1   0  10  615.74   16.50
  -1   0 -10  566.34   22.60
   1   0  10  591.14   17.90
   2   0  10 1561.94   42.20
   2   0  10 1611.74   40.20
   3   0  10    9.30    2.60
  -4   0 -10   84.79    5.50
   4   0  10   78.89    4.70
   4   0  10   71.29    8.20
  -4   0 -10   76.69    9.30
   5   0  10   68.69    5.00
  -5   0 -10   67.29    8.30
  -5   0 -10   65.79    5.50
   6   0  10  405.86   12.80
   6   0  10  426.36   15.00
  -6   0 -10  464.75   14.10
  -6   0 -10  428.56   16.00
  -7   0 -10  306.87   13.40
   7   0  10  316.37   12.70
   7   0  10  322.77   10.20
  -7   0 -10  316.17   11.50
  -8   0 -10  251.77   11.80
   8   0  10  227.78    8.70
   8   0  10  217.78   11.20
  -8   0 -10  244.18   10.30
   9   0  10  639.84   17.10
  -9   0 -10  638.74   20.30
 -10   0 -10    0.20    3.90
  10   0  10    4.00    1.40
  11   0  10   20.80    2.30
 -11  -1  10   20.50    2.80
  11  -1 -10   21.70    2.40
  11   1 -10   24.40    2.50
  10  -1 -10  243.98    8.40
 -10  -1  10  245.58    8.90
  10   1 -10  241.08    8.10
   9  -1 -10  184.98    8.70
  -9  -1  10  181.08    8.00
  -9   1  10  182.48    8.20
   9   1 -10  177.78    8.20
  -8  -1  10  773.62   24.90
   8  -1 -10  792.52   22.50
   8   1 -10  804.42   22.30
  -8   1  10  673.63   28.00
  -7  -1  10   42.00    5.80
   7  -1 -10   34.10    4.40
  -7  -1  10   41.50    6.70
   7   1 -10   31.80    4.20
  -7   1  10   33.20    5.20
  -6  -1  10  288.97   12.20
  -6  -1  10  283.67   10.20
   6  -1 -10  258.47   11.20
  -6   1  10  280.57   12.30
   6   1 -10  269.37   12.10
  -6   1  10  281.97   10.60
   6   1 -10  280.07   11.20
  -5  -1  10   -0.50    3.20
  -5  -1  10    3.80    2.70
   5  -1 -10   19.60    9.90
   5  -1 -10   -2.30    3.80
   5   1 -10    5.90    5.60
  -5   1  10    1.60    2.90
   5   1 -10   -1.40    8.20
   5   1 -10    1.50    3.90
  -4  -1  10   19.00    3.20
   4  -1 -10   15.40    4.40
  -4  -1  10   19.20    5.40
   4   1 -10   14.60    5.00
  -4   1  10   15.20    5.40
  -4   1  10   21.10    3.20
  -3  -1  10   67.69    9.50
  -3  -1  10   71.99    5.10
  -3   1  10   69.39    7.90
  -3   1  10   74.09    5.20
  -3   1  10   65.69    9.40
  -2  -1  10  529.25   19.30
   2  -1 -10  530.85   18.30
  -2  -1  10  487.35   14.80
  -2   1  10  510.85   14.70
  -2   1  10  507.05   16.90
  -2   1  10  523.85   19.10
   1  -1 -10 2456.95   63.29
  -1  -1  10 2480.25   64.69
  -1   1  10 2276.57   58.89
  -1   1  10 2422.66   60.99
   0  -1  10  317.77   10.10
   0  -1  10  318.37   10.40
   0  -1 -10  304.87   15.30
   0  -1  10  319.77   13.80
   0   1  10  340.87   10.90
   0   1  10  321.87   12.40
   1  -1  10 2585.24   62.29
   1  -1  10 2462.55   67.29
   1  -1  10 2573.44   63.69
   1   1  10 2610.34   65.49
   1   1  10 2479.05   62.99
   2  -1  10  522.15   19.50
   2  -1  10  556.84   15.40
   2  -1  10  556.74   17.10
   2   1  10  544.35   18.00
   2   1  10  560.54   15.90
   3  -1  10   85.79    5.00
   3  -1  10   74.19    6.90
  -3  -1 -10   66.79    5.20
   3  -1  10   57.89    8.70
   3   1  10   73.29    6.70
   3   1  10   62.99    5.00
   3   1  10   80.39    4.40
   4  -1  10   20.30    3.40
   4  -1  10    9.10    5.40
  -4  -1 -10    8.70    4.50
   4  -1  10   20.00    4.10
  -4  -1 -10   27.30    4.40
   4   1  10   23.70    3.20
   4   1  10   23.10    2.90
  -4   1 -10   20.70    5.90
   5  -1  10    3.80    2.20
  -5  -1 -10   -5.10    3.80
  -5  -1 -10    2.20    2.40
   5   1  10    3.80    2.00
  -5   1 -10   10.80    3.10
  -5   1 -10    6.60    5.10
   5   1  10    4.30    2.40
   6  -1  10  293.37   11.80
  -6  -1 -10  296.47   12.40
  -6  -1 -10  295.27   10.70
  -6   1 -10  297.17   11.00
   6   1  10  301.27   11.70
  -6   1 -10  293.67   13.30
   6   1  10  285.17    9.30
  -7  -1 -10   41.70    5.00
   7  -1  10   37.00    6.30
  -7  -1 -10   35.70    5.40
   7   1  10   36.20    5.60
   7   1  10   41.80    3.90
  -7   1 -10   45.90    6.40
  -7   1 -10   35.90    4.50
  -8  -1 -10  811.52   24.20
  -8  -1 -10  788.42   26.10
   8  -1  10  797.02   25.30
  -8   1 -10  830.42   24.50
   8   1  10  813.62   25.20
   8   1  10  776.42   22.50
  -9  -1 -10  177.88    7.30
   9  -1  10  180.58    6.30
  -9  -1 -10  182.98    9.90
  -9   1 -10  154.18   14.30
   9   1  10  187.58    6.20
  10  -1  10  243.88    7.60
 -10  -1 -10  247.58    9.20
  10   1  10  259.47    7.60
  11  -1  10   20.50    2.40
  11   1  10   15.70    2.10
 -11  -2  10   91.59    4.70
  11  -2 -10   94.39    4.30
  11   2 -10   76.49    5.10
  10  -2 -10   95.89    4.90
 -10  -2  10   86.49    5.10
  10   2 -10   89.39    4.50
  -9  -2  10   64.69    5.10
   9  -2 -10   77.19    6.80
   9   2 -10   62.29    5.70
   8  -2 -10  569.84   17.80
  -8  -2  10  573.64   18.00
   8   2 -10  552.74   17.10
  -8   2  10  555.44   17.70
  -7  -2  10   15.50    3.40
   7  -2 -10    8.80    4.20
  -7  -2  10   12.60    4.20
   7   2 -10    9.90    4.00
   7   2 -10   15.50    3.60
  -7   2  10   13.60    5.00
  -7   2  10    9.80    7.20
   6  -2 -10  238.58   12.60
  -6  -2  10  257.97   11.40
  -6  -2  10  265.27    9.60
  -6   2  10  259.17   12.10
   6   2 -10  213.88   14.50
  -6   2  10  244.38   14.40
   6   2 -10  238.88   10.70
  -5  -2  10  121.29    6.40
   5  -2 -10  124.59    8.10
  -5  -2  10  108.99    8.20
   5   2 -10  120.89    8.70
   5   2 -10  128.79    7.80
  -5   2  10  131.29    7.00
  -5   2  10  126.39   12.90
   4  -2 -10  811.82   22.80
  -4  -2  10  799.02   21.80
  -4   2  10  732.53   22.40
  -4   2  10  765.42   28.50
  -4   2  10  772.52   24.40
   4   2 -10  800.02   22.50
   4   2 -10  799.12   25.70
   4   2 -10  783.92   23.40
  -3  -2  10    4.20    4.30
  -3   2  10    7.30    2.60
  -3   2  10    6.20    4.20
  -3   2  10    8.40    3.10
  -3   2  10   17.50    5.70
  -2  -2  10  285.17   14.30
  -2  -2  10  259.97    9.90
  -2   2  10  286.27    9.40
  -2   2  10  268.27   12.50
  -2   2  10  290.77   12.30
  -1  -2  10  534.65   19.70
  -1   2  10  483.25   16.30
  -1   2  10  540.65   17.20
  -1   2  10  548.55   14.80
   0  -2  10  369.76   15.10
   0   2  10  348.37   10.40
   0   2  10  348.27   11.80
   0   2  10  370.06   12.40
   0   2  10  365.66   14.40
   1  -2  10  591.14   15.80
   1  -2  10  561.04   20.10
   1   2  10  549.95   14.80
   1   2  10  548.85   18.70
   1   2  10  534.45   19.60
   1   2  10  534.95   15.50
   2  -2  10  277.57   13.30
   2  -2  10  287.07    9.20
   2  -2  10  297.77   10.70
   2   2  10  288.47    9.70
   2   2  10  271.17    8.30
   2   2  10  290.47   12.10
   3  -2  10    8.10    3.30
   3  -2  10    9.00    2.40
   3  -2  10    5.40    4.30
  -3  -2 -10    8.80    2.60
   3   2  10    7.10    3.30
   3   2  10   13.40    2.70
   3   2  10   13.40    2.10
   4  -2  10  826.02   23.20
   4  -2  10  821.02   27.70
  -4  -2 -10  828.22   24.00
  -4  -2 -10  822.22   22.70
   4   2  10  839.32   23.50
  -4   2 -10  803.72   25.10
   4   2  10  822.22   21.20
   5  -2  10  120.69    6.90
  -5   2 -10  115.39   10.50
   5   2  10  123.49    5.10
   5   2  10  130.89    6.60
  -6  -2 -10  230.78   13.30
   6  -2  10  248.78   11.00
  -6  -2 -10  258.17    9.70
   6   2  10  263.37   10.70
  -6   2 -10  249.08   13.20
   6   2  10  273.97    8.30
  -7  -2 -10    6.70    3.70
   7  -2  10    3.40    4.00
  -7  -2 -10    8.30    2.70
  -7   2 -10   12.50    5.60
   7   2  10    9.60    2.10
   7   2  10    8.40    3.30
   8  -2  10  539.35   20.00
  -8  -2 -10  566.14   16.90
  -8  -2 -10  575.04   18.40
   8   2  10  557.04   19.40
   8   2  10  564.34   15.40
  -9  -2 -10   57.19    4.60
  -9  -2 -10   73.49    7.30
   9  -2  10   70.39    4.50
   9   2  10   70.99    3.50
 -10  -2 -10   79.89    5.40
  10   2  10   97.19    3.70
  11  -2  10   99.49    4.00
 -11  -2 -10   95.39    5.60
  11   2  10   97.19    3.60
  10  -3 -10  252.07    8.40
 -10  -3  10  250.57    8.70
  10   3 -10  244.88    7.80
   9  -3 -10   14.70    2.80
  -9  -3  10   16.00    2.60
   9   3 -10   19.20    2.60
   7  -3 -10  207.28    9.80
  -7  -3  10  223.78   10.60
  -7  -3  10  215.68    8.70
  -7   3  10  235.08   13.60
   7   3 -10  219.28    9.30
   7   3 -10  214.58    9.20
   6  -3 -10   22.90    3.60
  -6  -3  10   26.30    4.80
   6  -3 -10   16.40    3.90
  -6  -3  10   23.30    3.50
  -6   3  10   29.10    6.40
   6   3 -10   21.70    3.80
  -6   3  10   16.90    5.60
   6   3 -10   19.50    3.70
  -5  -3  10  248.58   11.00
   5  -3 -10  223.88   10.30
  -5  -3  10  240.28    9.30
   5  -3 -10  235.68    9.00
  -5   3  10  229.08   12.20
   5   3 -10  243.68   10.40
  -5   3  10  234.88   12.80
   5   3 -10  237.48    9.80
  -5   3  10  239.38   10.10
   4  -3 -10   74.69   10.50
  -4  -3  10   70.89    5.30
  -4  -3  10   67.19    7.10
   4  -3 -10   73.09    6.00
   4  -3 -10   83.39    7.20
   4   3 -10   73.09    7.60
  -4   3  10   61.99    9.50
   4   3 -10   64.59    6.70
  -4   3  10   59.99    6.20
   3  -3 -10 1315.97   36.00
  -3  -3  10 1379.86   35.00
  -3   3  10 1362.66   41.20
  -3   3  10 1399.26   37.00
   3   3 -10 1285.07   35.20
  -3   3  10 1396.96   35.00
   3   3 -10 1329.77   37.70
   3   3 -10 1327.17   36.30
  -3   3  10 1314.67   39.10
  -2  -3  10 1259.37   32.20
  -2  -3  10 1176.28   38.10
  -2   3  10 1239.58   35.50
  -2   3  10 1227.68   31.90
  -2   3  10 1254.07   33.60
  -1  -3  10  641.64   23.80
  -1   3  10  648.14   19.20
  -1   3  10  652.13   20.50
  -1   3  10  651.23   17.70
   0  -3  10  692.33   24.10
   0   3  10  692.33   20.60
   0   3  10  669.83   18.00
   0   3  10  687.53   19.20
   0   3  10  658.73   23.50
   1  -3  10  661.13   23.40
   1   3  10  649.74   17.60
   1   3  10  691.43   19.90
   1   3  10  677.73   23.10
   1   3  10  679.53   18.50
   2  -3  10 1294.47   38.80
   2   3  10 1297.57   38.40
   2   3  10 1330.17   35.00
  -3  -3 -10 1333.27   35.50
  -3  -3 -10 1346.07   36.70
   3  -3  10 1383.46   40.80
   3  -3  10 1376.96   35.60
   3   3  10 1401.46   36.60
   3   3  10 1361.06   33.90
   4  -3  10   65.89    5.40
  -4  -3 -10   50.69    9.20
  -4  -3 -10   68.99    5.20
   4   3  10   72.29    3.70
  -4   3 -10   71.69    8.00
   4   3  10   68.89    4.80
   5  -3  10  234.88   10.10
  -5  -3 -10  236.28    9.20
   5   3  10  237.78    9.90
  -5   3 -10  258.27   13.10
  -6  -3 -10   20.90    3.50
   6  -3  10   22.30    4.20
   6   3  10   22.00    4.30
   6   3  10   17.90    2.30
  -6   3 -10    9.80    8.10
   7  -3  10  219.48   12.00
  -7  -3 -10  212.48    9.10
   7   3  10  217.38    7.50
   7   3  10  213.28   10.30
  -8  -3 -10  579.04   18.10
  -8  -3 -10  558.04   16.80
   8   3  10  543.75   19.20
  -9  -3 -10   13.50    2.90
  -9  -3 -10   21.70    3.50
   9   3  10   17.80    2.20
  10  -3  10  251.07    8.00
 -10  -3 -10  257.77    9.10
  10   3  10  264.87    7.60
 -10  -4  10  128.49    5.40
  10  -4 -10  118.29    5.30
  10   4 -10  119.89    4.80
   9  -4 -10  133.29    6.10
  -9  -4  10  128.09    6.10
   9   4 -10  119.19    5.30
   8  -4 -10   48.10    6.40
  -8  -4  10   45.80    4.80
  -8   4  10   51.49    8.00
   8   4 -10   49.50    5.20
   7  -4 -10   60.49    6.70
   7  -4 -10   66.19    8.90
  -7  -4  10   64.29    5.60
  -7  -4  10   59.49    7.90
   7   4 -10   55.79    5.60
   7   4 -10   61.29    5.60
   6  -4 -10  115.99    7.80
   6  -4 -10  121.59    6.70
  -6  -4  10  108.69    8.20
  -6  -4  10  112.59    6.40
   6   4 -10  106.69    6.80
   6   4 -10  120.69    7.20
  -6   4  10  128.09   11.10
  -5  -4  10  303.77   10.70
   5  -4 -10  296.77   10.20
  -5  -4  10  302.67   12.50
   5   4 -10  254.97   14.90
  -5   4  10  305.97   14.10
   4  -4 -10  140.79    8.70
  -4  -4  10  133.69    7.00
  -4  -4  10  144.09    8.80
   4  -4 -10  122.19   15.00
   4  -4 -10  132.99    7.00
  -4   4  10  132.49    8.50
   4   4 -10  137.39    8.20
   4   4 -10  138.39    7.50
  -4   4  10  133.19    9.70
  -4   4  10  123.39   10.50
  -3  -4  10  823.92   22.60
  -3  -4  10  813.62   24.30
   3  -4 -10  796.12   22.00
   3  -4 -10  799.42   26.50
   3   4 -10  803.42   23.80
  -3   4  10  827.12   24.90
  -3   4  10  832.92   23.30
  -3   4  10  820.42   27.60
   3   4 -10  824.92   22.80
  -2  -4  10  375.86   12.80
   2  -4 -10  398.76   16.90
   2   4 -10  386.56   13.00
  -2   4  10  396.66   15.80
   2   4 -10  389.26   14.50
  -2   4  10  384.96   12.30
  -2   4  10  389.66   14.60
   1  -4 -10  537.65   19.70
  -1   4  10  569.54   17.50
  -1   4  10  568.44   19.40
  -1   4  10  581.04   16.10
   1   4 -10  549.95   18.50
   0  -4  10  617.84   24.10
   0  -4 -10  571.64   20.10
   0   4  10  612.94   16.60
   0   4  10  620.24   18.00
   0   4  10  626.14   19.80
   0   4 -10  591.44   22.40
  -1  -4 -10  514.45   19.20
   1  -4  10  559.24   23.00
   1   4  10  589.54   15.90
   1   4  10  594.54   16.90
   1   4  10  592.14   18.60
  -1   4 -10  668.93   23.20
  -2  -4 -10  378.86   15.30
   2  -4  10  361.06   19.80
   2   4  10  366.06   11.10
   2   4  10  403.26   13.40
   2   4  10  380.96   13.40
  -2   4 -10  368.16   15.50
  -3  -4 -10  848.12   23.10
  -3  -4 -10  789.92   25.00
   3   4  10  860.41   24.40
  -3   4 -10  812.62   25.80
  -4  -4 -10  131.79    6.90
  -4  -4 -10  108.89   11.90
  -4   4 -10  132.29   12.00
   4   4  10  132.79    5.10
   4   4  10  141.99    7.30
  -5  -4 -10  288.57   10.80
   5   4  10  302.27   11.80
   5   4  10  295.77    9.00
  -5   4 -10  300.97   15.50
  -6  -4 -10  117.89    6.90
   6  -4  10  116.69   13.60
   6   4  10  116.89    7.60
   6   4  10  121.99    5.10
  -7  -4 -10   47.80    5.70
   7   4  10   60.29    6.70
   7   4  10   67.89    4.00
  -8  -4 -10   59.79    6.30
  -8  -4 -10   43.90    4.20
   8   4  10   44.40    2.90
  -9  -4 -10  128.39    6.20
  -9  -4 -10  128.79    5.70
   9   4  10  128.09    4.60
 -10  -4 -10  129.39    5.70
  10   4  10  125.99    4.50
  10  -5 -10  113.49    4.80
 -10  -5  10  108.29    4.80
  10   5 -10   93.99    4.40
  -9  -5  10   62.59    4.30
   9  -5 -10   60.09    4.40
   9   5 -10   57.09    3.60
  -8  -5  10  255.97    8.40
   8  -5 -10  252.87   13.10
  -8  -5  10  274.17    9.70
  -8   5  10  254.27   11.50
   8   5 -10  245.18    8.60
   7  -5 -10  379.56   13.50
  -7  -5  10  377.26   13.00
  -7  -5  10  364.66   11.30
   7  -5 -10  363.66   11.30
   7   5 -10  377.46   12.30
   7   5 -10  375.26   12.20
  -7   5  10  376.26   14.90
   6  -5 -10  792.92   22.10
  -6  -5  10  804.92   24.00
  -6  -5  10  800.72   22.30
   6  -5 -10  807.52   23.50
   6   5 -10  795.42   22.50
   6   5 -10  800.52   22.70
  -6   5  10  818.92   26.60
  -5  -5  10  452.25   14.00
   5  -5 -10  436.46   15.00
  -5  -5  10  440.56   15.60
   5  -5 -10  436.16   13.60
   5   5 -10  434.16   14.00
   5   5 -10  433.66   14.30
  -5   5  10  429.56   17.60
  -4  -5  10  558.04   16.60
   4  -5 -10  555.24   21.90
   4  -5 -10  559.74   16.10
  -4  -5  10  563.04   18.40
  -4   5  10  530.85   22.90
  -4   5  10  543.25   19.50
   3  -5 -10  382.36   12.00
  -3  -5  10  370.76   14.30
  -3  -5  10  380.36   12.60
   3  -5 -10  371.16   16.90
  -3   5  10  359.76   13.30
  -3   5  10  390.86   15.20
  -3   5  10  366.06   17.50
   3   5 -10  380.56   13.50
  -2  -5  10  226.08   12.70
  -2  -5  10  243.08    9.70
   2  -5 -10  239.48   13.00
   2  -5 -10  241.98    9.20
  -2   5  10  231.58   11.20
  -2   5  10  232.18   12.90
  -2   5  10  241.78    9.40
   2   5 -10  238.18   10.80
   2   5 -10  240.68    9.30
   1  -5 -10  790.62   24.70
  -1  -5  10  802.52   25.00
  -1  -5  10  788.42   23.10
   1   5 -10  783.02   22.30
   1   5 -10  834.82   24.10
  -1   5  10  822.72   22.10
  -1   5  10  819.82   23.90
  -1   5  10  844.72   26.90
   0  -5 -10  206.88   10.90
   0   5  10  198.58    8.90
   0   5  10  202.88   10.30
   0   5 -10  198.38   10.90
   0   5  10  200.58    7.60
  -1  -5 -10  764.92   23.70
   1   5  10  794.22   24.70
  -1   5 -10  785.32   23.90
  -1   5 -10  786.12   22.30
   1   5  10  830.02   21.20
   1   5  10  806.62   22.40
  -2  -5 -10  218.28   13.40
  -2  -5 -10  241.98   11.60
  -2   5 -10  251.97   12.30
   2   5  10  235.48    7.80
  -2   5 -10  224.08   10.90
   2   5  10  244.98    9.00
   2   5  10  240.58   10.50
  -3  -5 -10  370.66   14.70
   3   5  10  385.86   11.20
   3   5  10  378.26   12.10
  -3   5 -10  371.16   15.40
   3   5  10  383.46   14.10
  -4  -5 -10  539.75   18.80
  -4  -5 -10  555.34   16.70
   4   5  10  559.34   18.50
   4   5  10  578.44   15.30
   4   5  10  539.25   16.20
  -4   5 -10  518.85   19.30
  -5  -5 -10  425.06   17.10
  -5  -5 -10  443.76   14.20
   5   5  10  416.56   15.50
  -6  -5 -10  835.62   23.20
   6   5  10  771.52   25.00
  -7  -5 -10  389.86   12.30
   7   5  10  340.47   14.60
  -8  -5 -10  274.17   12.30
  -8  -5 -10  272.37    9.50
  -9  -5 -10   66.79    4.10
  -9  -5 -10   64.39    4.40
   9   5  10   65.99    3.20
   9   5  10   69.99    3.80
 -10  -5 -10   98.59    4.70
  10   5  10  110.89    4.10
  10   5  10  101.19    4.50
   9  -6 -10   63.79    4.00
  -9  -6  10   57.49    4.30
   9   6 -10   60.29    3.40
   8  -6 -10   92.09    5.20
  -8  -6  10   91.89    5.30
   8   6 -10   96.29    4.40
  -8   6  10   88.69    7.50
   7  -6 -10  244.28    8.50
  -7  -6  10  258.47    9.60
  -7  -6  10  271.07    8.40
  -7   6  10  256.77   11.70
   7   6 -10  254.17    9.10
   6  -6 -10   20.90    2.90
  -6  -6  10   20.80    3.40
  -6  -6  10   17.70    2.30
   6  -6 -10   13.30    3.60
   6   6 -10   25.00    3.50
  -6   6  10   21.90    4.90
   6   6 -10   15.40    2.80
   5  -6 -10  126.79    7.10
   5  -6 -10  140.39    8.00
  -5  -6  10  127.09    6.70
  -5  -6  10  121.79    9.10
   5   6 -10  133.19    6.80
   5   6 -10  129.59    7.10
  -5   6  10  114.19   10.50
  -4  -6  10  893.21   24.10
  -4  -6  10  856.71   25.50
   4  -6 -10  870.91   23.50
   4  -6 -10  849.61   27.90
   4   6 -10  874.81   23.90
   4   6 -10  874.41   24.60
  -4   6  10  843.42   27.40
  -3  -6  10    2.10    5.10
   3  -6 -10   -8.60    6.30
  -3  -6  10    0.30    2.80
   3  -6 -10    5.30    3.20
  -3   6  10    7.70    4.50
  -3   6  10    5.00    5.50
   3   6 -10    4.80    2.80
   3   6 -10    0.00    3.30
   2  -6 -10  394.56   16.10
  -2  -6  10  406.26   13.20
   2  -6 -10  390.26   12.70
   2   6 -10  408.86   14.30
  -2   6  10  417.26   15.70
   2   6 -10  406.46   12.90
  -2   6  10  398.06   18.40
  -1  -6  10  209.88    9.70
   1  -6 -10  212.88   11.30
  -1   6  10  229.48    9.10
  -1   6  10  218.08   10.60
  -1   6  10  214.58   12.60
   1   6 -10  228.68   10.40
   1   6 -10  232.18    8.90
   0  -6 -10  369.96   14.30
   0   6  10  379.06   16.00
   0   6 -10  361.86   12.20
   0   6  10  361.86   13.40
   0   6  10  354.96   11.80
   0   6 -10  378.76   13.90
  -1  -6 -10  214.18   10.90
  -1   6 -10  224.78    9.10
   1   6  10  229.38    9.70
   1   6  10  230.78    8.20
  -1   6 -10  210.78   11.30
   1   6  10  221.68   11.60
  -2  -6 -10  397.76   14.70
   2   6  10  403.76   13.40
   2   6  10  401.66   15.70
  -2   6 -10  381.46   15.50
   2   6  10  397.96   11.90
  -3  -6 -10    4.20    4.60
   3   6  10    2.30    1.90
   3   6  10    5.50    3.10
  -3   6 -10    0.80    7.80
   3   6  10    3.30    2.70
  -4  -6 -10  858.31   25.90
   4   6  10  910.41   24.60
   4   6  10  890.11   23.20
   4   6  10  858.01   27.50
  -5  -6 -10  123.29    7.30
  -5  -6 -10  123.89   10.10
   5   6  10  127.39    6.90
   5   6  10  125.09    5.60
   5   6  10  126.09    9.40
  -6  -6 -10   21.40    2.70
   6   6  10   20.80    5.10
   6   6  10   19.60    2.60
   6   6  10   16.90    2.50
  -7  -6 -10  253.47   10.40
  -7  -6 -10  239.98    9.00
   7   6  10  248.98    7.80
   7   6  10  253.77    8.70
  -8  -6 -10  100.29    5.20
   8   6  10   98.89    4.70
   8   6  10   96.79    4.00
  -9  -6 -10   58.19    3.80
   9   6  10   60.29    3.80
   9   6  10   53.09    3.50
  -8  -7  10  126.99    6.20
   8  -7 -10  137.49    5.70
  -8   7  10  133.29    7.80
   8   7 -10  137.99    4.90
   7  -7 -10  155.28    6.60
   7  -7 -10  149.79    6.70
  -7  -7  10  161.98    7.20
  -7  -7  10  165.68    5.70
  -7   7  10  160.98    9.20
   7   7 -10  155.28    5.90
   6  -7 -10   89.99    5.30
  -6  -7  10   89.89    6.50
  -6  -7  10   89.69    4.50
   6  -7 -10   92.89    6.70
   6   7 -10  103.39    5.70
   6   7 -10   95.79    5.70
  -6   7  10   89.19    8.00
   5  -7 -10   19.70    2.90
  -5  -7  10   17.40    2.30
  -5  -7  10   25.30    4.10
   5  -7 -10   23.20    3.90
   5   7 -10   21.20    3.20
  -5   7  10   26.20    4.60
   5   7 -10   18.50    3.20
   5   7 -10    8.20    4.10
   4  -7 -10  133.59   12.60
  -4  -7  10  105.09    6.30
   4  -7 -10  130.39    7.10
   4   7 -10  111.79    6.40
   4   7 -10  114.39    6.60
  -4   7  10  116.49   10.40
   3  -7 -10  944.91   28.70
   3  -7 -10  957.40   25.60
  -3  -7  10  981.80   26.00
   3   7 -10  953.80   25.90
  -3   7  10  958.60   29.60
   3   7 -10  956.00   26.50
  -3   7  10  924.21   34.80
   2  -7 -10  437.76   16.60
  -2  -7  10  463.85   14.10
   2   7 -10  464.55   14.90
  -2   7  10  437.16   21.10
   2   7 -10  441.66   13.80
  -2   7  10  428.46   16.90
   1  -7 -10  237.58   11.60
  -1  -7  10  241.68    9.70
   1   7 -10  239.98   10.50
  -1   7  10  250.47   12.00
   1   7 -10  247.38    9.30
  -1   7  10  235.08   14.60
   0  -7 -10  291.57   12.30
   0  -7  10  269.57   11.30
   0   7  10  289.77   15.10
   0   7 -10  271.67   11.60
   0   7 -10  287.87   10.30
   0   7  10  286.97   12.30
  -1  -7 -10  246.08   11.20
   1   7  10  242.88   13.20
   1   7  10  246.38    9.40
   1   7  10  230.78   10.80
  -1   7 -10  238.18   11.40
  -2  -7 -10  466.75   15.90
   2   7  10  444.06   15.20
   2   7  10  449.95   13.70
   2   7  10  450.65   18.50
  -3  -7 -10  953.80   27.60
  -3  -7 -10  952.70   27.50
   3   7  10  953.80   30.60
   3   7  10  943.21   25.10
   3   7  10  947.91   26.80
  -4  -7 -10  115.39    8.60
  -4  -7 -10  127.19    8.90
   4   7  10  113.49    5.80
   4   7  10   97.59   10.00
   4   7  10  121.69    7.20
  -5  -7 -10   21.50    5.10
  -5  -7 -10   23.10    4.40
   5   7  10   16.80    2.10
   5   7  10   14.70    5.70
   5   7  10   24.40    3.80
  -6  -7 -10  100.49    7.00
   6   7  10  100.09    5.30
   6   7  10   86.29    4.30
  -7  -7 -10  148.29    6.70
   7   7  10  153.08    6.40
   7   7  10  159.48    5.60
  -8  -7 -10  138.59    5.80
   8   7  10  130.59    7.00
   8   7  10  133.09    5.60
   8  -8 -10   32.70    3.00
  -8   8  10   41.90    5.60
   7  -8 -10  105.59    4.80
  -7  -8  10   93.99    4.30
   7   8 -10   95.59    4.00
  -7   8  10   96.09    8.50
   6  -8 -10    3.60    2.20
  -6  -8  10    3.50    1.70
  -6   8  10    8.00    3.60
   6   8 -10   -2.70    3.30
   6   8 -10    0.70    1.70
  -5  -8  10  206.78    7.70
   5  -8 -10  205.58    7.60
  -5   8  10  208.88   10.30
   5   8 -10  209.98    8.60
   5   8 -10  195.98    8.80
  -4  -8  10  752.52   20.40
   4  -8 -10  730.83   20.10
   4  -8 -10  761.82   25.20
  -4   8  10  757.12   23.90
   4   8 -10  735.93   20.70
   4   8 -10  766.92   21.20
  -3  -8  10   41.10    3.70
   3  -8 -10   38.10    6.40
   3   8 -10   36.20    5.00
  -3   8  10   43.00    6.60
   3   8 -10   46.80    4.80
  -3   8  10   39.40    9.60
   2  -8 -10  432.06   16.10
  -2   8  10  404.06   21.80
   2   8 -10  434.46   13.50
   2   8 -10  448.66   14.00
   1  -8 -10  339.37   13.80
  -1  -8  10  345.87   11.40
  -1   8  10  313.67   18.30
  -1   8  10  304.57   14.10
   1   8 -10  341.97   11.30
   1   8 -10  347.77   12.00
   0  -8 -10    6.10    3.80
   0  -8  10   10.10    3.50
   0   8  10    8.20    6.40
   0   8  10    8.80    4.10
   0   8 -10   13.80    3.90
  -1  -8 -10  319.57   13.00
   1   8  10  316.57   17.20
   1   8  10  347.47   13.80
  -2  -8 -10  434.86   15.40
   2   8  10  421.16   19.60
  -3  -8 -10   44.50    5.40
   3   8  10   35.60    4.70
   3   8  10   36.70    6.80
  -4  -8 -10  739.43   22.70
  -4  -8 -10  766.82   22.50
   4   8  10  722.83   21.40
  -5  -8 -10  212.98    8.90
  -5  -8 -10  195.78    8.20
   5   8  10  194.38    8.00
  -6  -8 -10   -0.30    4.10
  -6  -8 -10    2.20    2.70
   6   8  10    1.50    2.30
  -7  -8 -10   84.89    4.70
   7   8  10   86.99    5.00
  -8  -8 -10   47.00    5.00
   8   8  10   33.50    4.00
   6  -9 -10   16.00    2.00
  -6  -9  10   12.90    1.80
  -6   9  10   18.80    4.00
   5  -9 -10  264.27    8.80
  -5  -9  10  272.17    8.20
   5   9 -10  264.27    8.30
  -5   9  10  258.07   10.90
   4  -9 -10  216.48    7.80
  -4  -9  10  213.28    7.20
  -4   9  10  205.48    9.80
   4   9 -10  213.48    7.30
  -3  -9  10   88.89    4.40
   3  -9 -10   82.99    7.20
   3   9 -10   91.49    4.60
  -3   9  10   86.59    7.80
  -2  -9  10  249.38    8.20
   2  -9 -10  235.08   11.70
  -2   9  10  245.48   10.80
   2   9 -10  238.18    9.80
  -1  -9  10   57.19    4.00
   1  -9 -10   63.89    7.70
   1   9 -10   54.79    5.80
  -1   9  10   58.69    6.10
   0  -9 -10   72.39    7.60
   0  -9  10   65.69    4.30
   0   9  10   67.79    6.30
   1  -9  10   65.09    4.70
  -1  -9 -10   54.39    7.00
   1   9  10   78.69    6.30
  -2  -9 -10  267.47   11.20
   2   9  10  234.28   10.20
   3   9  10   84.19    6.10
  -4  -9 -10  200.08    8.40
   4   9  10  207.58    8.50
  -5  -9 -10  253.57    9.30
   5   9  10  263.37    9.50
  -6  -9 -10   16.40    3.50
  -6  -9 -10   21.50    4.90
   6   9  10   14.60    3.30
  -5 -10  10   64.89    3.10
   5 -10 -10   63.59    3.50
  -5  10  10   62.69    6.00
   4 -10 -10  132.69    5.30
  -4  10  10  136.29    8.90
  -3 -10  10  139.69    5.20
   3 -10 -10  156.08    8.10
   3 -10 -10  139.79    5.80
  -3  10  10  143.89    7.90
   2 -10 -10    9.60    2.90
   2 -10 -10   13.50    3.30
  -2 -10  10    7.30    1.70
  -2  10  10    7.40    3.60
   1 -10 -10  184.08    8.00
  -1 -10  10  175.38    6.20
  -1  10  10  181.18    8.40
   0 -10 -10   11.70    2.90
   0 -10  10   14.40    1.90
   0  10  10   12.70    3.40
  -1 -10 -10  175.48    7.70
   1 -10  10  178.68    6.20
   1  10  10  171.18    8.20
   2 -10  10    9.00    2.40
  -2 -10 -10    8.80    2.60
   2  10  10    7.30    3.60
  -3 -10 -10  148.39    6.60
   3  10  10  140.19    7.40
  -4 -10 -10  131.29    6.00
   4  10  10  131.39    7.00
   5  10  10   54.89    6.60
   2 -11 -10  149.29    7.10
  -2 -11  10  147.59    4.90
  -2  11  10  139.49    7.50
   1 -11 -10  133.59    6.40
  -1 -11  10  146.49    5.00
  -1  11  10  147.99    7.80
   0 -11 -10  450.75   13.50
   0 -11  10  450.45   12.00
   0  11  10  443.06   14.40
   1 -11  10  139.59    5.00
  -1 -11 -10  151.98    6.30
   1  11  10  141.29    7.40
  -2 -11 -10  139.49    6.00
   2  11  10  129.59    7.70
  11   0 -11   28.90    2.40
 -10   0  11   14.80    3.80
  10   0 -11   14.90    2.10
   9   0 -11   82.89    8.90
  -9   0  11   81.79    5.80
  -8   0  11  448.46   15.00
   8   0 -11  423.76   14.40
  -7   0  11   43.50    6.70
  -7   0  11   62.89    7.50
   7   0 -11   54.29    6.50
  -6   0  11  324.07   13.20
  -6   0  11  309.87   11.20
   6   0 -11  313.77   23.70
   6   0 -11  310.07   12.00
   5   0 -11 1201.18   36.00
   5   0 -11 1210.28   32.60
  -4   0  11  149.49    7.20
   4   0 -11  158.68    9.30
   4   0 -11  187.38   13.80
  -3   0  11  286.57   16.40
  -3   0  11  286.57   10.00
  -2   0  11   -1.70    5.60
  -2   0  11    4.20    2.50
  -2   0  11   -1.00    4.00
  -1   0  11  497.75   15.80
  -1   0  11  500.45   19.40
  -1   0  11  467.55   14.00
   0   0  11    1.90    2.40
   0   0  11   -2.70    2.90
   0   0  11    0.10    2.70
   0   0  11   -0.70    2.40
   1   0  11  519.35   14.70
   1   0  11  468.65   18.60
   2   0  11    0.10    1.80
   2   0  11   -2.20    2.50
  -3   0 -11  275.27   12.80
   3   0  11  285.57    9.70
   3   0  11  288.97   12.70
   4   0  11  159.78    7.00
  -4   0 -11  155.68    9.90
  -5   0 -11 1234.58   34.70
   5   0  11 1255.47   34.10
   6   0  11  317.47   12.30
  -6   0 -11  316.77   11.50
   6   0  11  312.07   10.40
   7   0  11   59.59    7.00
   7   0  11   56.09    5.10
  -7   0 -11   62.29    6.00
  -7   0 -11   74.49    8.40
  -8   0 -11  428.46   15.70
   8   0  11  424.36   16.30
   8   0  11  436.46   12.20
  -9   0 -11   69.59    6.40
   9   0  11   89.79    4.00
 -10   0 -11   17.50    3.70
  10   0  11   13.30    1.70
  11   0  11   30.90    2.40
  10  -1 -11  320.77   10.00
 -10  -1  11  330.67   10.60
  10   1 -11  315.07    9.70
 -10   1  11  318.27   10.70
  -9  -1  11   98.29    6.00
  -9   1  11   92.89    6.30
  -8  -1  11  210.88    9.40
   8  -1 -11  232.78   10.00
  -8   1  11  205.48    9.40
   8   1 -11  225.88    9.50
  -7  -1  11  235.68    9.50
  -7  -1  11  243.88   11.30
   7  -1 -11  231.18   10.30
   7   1 -11  226.18    9.90
  -7   1  11  238.08   11.60
  -6  -1  11   29.70    5.00
   6  -1 -11   32.00    4.70
  -6  -1  11   26.50    3.70
  -6   1  11   37.90    5.50
   6   1 -11   36.70    5.80
   6   1 -11   23.00    4.10
  -6   1  11   27.10    4.20
  -5  -1  11  492.05   15.50
   5  -1 -11  513.55   16.50
   5  -1 -11  510.95   21.30
  -5  -1  11  513.95   17.60
   5   1 -11  509.15   16.30
  -5   1  11  512.85   15.70
   5   1 -11  501.05   20.00
   5   1 -11  509.25   17.40
  -4  -1  11  714.93   19.90
   4  -1 -11  694.13   24.60
   4  -1 -11  681.13   20.70
  -4   1  11  717.83   19.90
   4   1 -11  679.63   20.50
   4   1 -11  686.83   22.20
   4   1 -11  675.33   23.70
  -3  -1  11  498.95   15.40
  -3   1  11  530.45   15.50
  -3   1  11  512.65   21.60
   3   1 -11  516.85   20.30
  -3   1  11  538.55   19.30
  -2  -1  11  382.76   17.30
  -2  -1  11  392.86   12.30
  -2   1  11  398.66   15.10
  -2   1  11  389.26   17.70
  -2   1  11  399.76   12.10
  -1  -1  11  846.22   28.10
  -1  -1  11  774.52   22.10
  -1   1  11  865.91   24.40
  -1   1  11  839.82   22.00
   0  -1  11 2515.85   69.39
   0   1  11 2511.75   62.89
   0   1  11 2618.94   67.69
   0   1  11 2676.43   65.09
   1  -1  11  853.31   28.50
   1  -1  11  929.41   25.10
   1  -1  11  906.01   23.30
   1   1  11  896.31   24.10
   1   1  11  838.52   23.20
   1   1  11  874.41   26.50
   1   1  11  825.12   22.40
   2  -1  11  426.36   12.60
   2  -1  11  433.96   14.70
   2  -1  11  403.46   17.80
   2   1  11  417.86   15.50
   2   1  11  421.66   12.90
   2   1  11  384.96   11.50
   3  -1  11  558.24   15.60
  -3  -1 -11  527.45   18.20
   3  -1  11  541.05   18.70
   3  -1  11  503.15   21.60
  -3   1 -11  508.55   18.50
   3   1  11  540.35   15.90
   3   1  11  541.85   14.40
   3   1  11  496.35   18.90
   4  -1  11  739.23   20.60
  -4  -1 -11  668.53   21.80
  -4  -1 -11  711.23   20.30
   4   1  11  695.93   18.70
  -4   1 -11  730.93   22.40
   4   1  11  726.63   20.80
  -5  -1 -11  561.24   18.20
  -5  -1 -11  544.25   16.50
   5  -1  11  529.65   17.10
   5   1  11  530.75   14.90
  -5   1 -11  538.65   18.60
   5   1  11  560.84   17.40
  -6  -1 -11   31.20    5.00
   6  -1  11   33.30    5.50
  -6  -1 -11   31.10    5.20
   6   1  11   24.10    5.10
  -6   1 -11   27.10    7.20
   6   1  11   33.00    3.90
  -7  -1 -11  263.47   11.80
  -7  -1 -11  246.28   10.00
   7  -1  11  225.68   11.30
   7   1  11  238.58    8.10
  -7   1 -11  234.38   12.00
   7   1  11  232.98   11.20
   8  -1  11  216.68   11.90
  -8  -1 -11  218.98    8.60
   8  -1  11  227.78    7.70
  -8  -1 -11  216.98   10.70
   8   1  11  220.98    7.20
  -8   1 -11  224.28   11.70
   8   1  11  221.28   11.30
  -9  -1 -11  109.09    6.70
   9  -1  11  108.69    4.60
   9   1  11  105.59    4.30
  -9   1 -11   84.39    7.20
  10  -1  11  331.27    9.40
 -10  -1 -11  327.37   10.90
  10   1  11  340.77    9.40
  10  -2 -11    1.60    2.00
 -10  -2  11   -1.50    2.30
  10   2 -11    4.40    1.90
   9  -2 -11   13.20    2.60
  -9  -2  11   11.20    2.60
   9   2 -11   13.10    2.30
  -9   2  11    4.90    4.10
  -8  -2  11   56.49    5.30
   8  -2 -11   49.90    6.10
   8   2 -11   60.29    5.60
  -8   2  11   53.49    6.90
  -7  -2  11  249.78   11.60
   7  -2 -11  254.67   10.90
  -7  -2  11  254.67    9.90
  -7   2  11  265.27   12.50
   7   2 -11  259.37   10.40
   7   2 -11  251.37   10.50
   6  -2 -11  226.48   10.10
  -6  -2  11  214.58    8.80
  -6  -2  11  204.58   10.50
  -6   2  11  216.48   11.60
   6   2 -11  213.18    9.40
   6   2 -11  203.58    9.90
  -6   2  11  222.88   15.30
   5  -2 -11  332.37   12.40
   5  -2 -11  343.87   18.30
  -5  -2  11  326.87   11.40
  -5  -2  11  325.37   13.20
   5   2 -11  321.07   12.60
  -5   2  11  338.47   11.80
  -5   2  11  307.47   16.80
   5   2 -11  331.57   12.10
  -4  -2  11   44.50    4.90
   4  -2 -11   66.29    9.30
   4  -2 -11   44.60    5.50
   4   2 -11   30.90    5.40
  -4   2  11   45.20    5.20
  -4   2  11   33.60    7.30
   4   2 -11   37.20    7.10
   4   2 -11   42.20    4.90
  -3  -2  11 1315.87   33.00
   3  -2 -11 1191.28   33.70
   3  -2 -11 1245.88   36.90
   3   2 -11 1281.47   33.40
   3   2 -11 1285.07   34.70
   3   2 -11 1259.77   36.00
  -3   2  11 1236.58   35.00
  -3   2  11 1205.78   39.20
  -3   2  11 1260.57   36.60
  -2  -2  11  360.46   22.10
  -2  -2  11  380.36   12.30
  -2   2  11  372.06   15.00
  -2   2  11  389.16   14.60
  -2   2  11  385.16   11.90
  -1  -2  11  493.15   20.10
  -1  -2  11  478.95   15.10
  -1   2  11  525.85   14.30
  -1   2  11  476.65   16.10
  -1   2  11  519.95   16.70
   0  -2  11  220.88   13.10
   0   2  11  223.78    9.20
   0   2  11  240.58    9.30
   0   2  11  210.38   11.80
   0   2  11  225.98    7.50
   1  -2  11  509.45   20.60
   1   2  11  518.15   16.00
   1   2  11  540.35   19.10
   1   2  11  511.95   15.10
   1   2  11  529.45   14.20
   2  -2  11  376.86   18.40
   2  -2  11  402.56   14.80
   2   2  11  408.16   12.90
   2   2  11  376.16   10.90
   2   2  11  398.36   15.90
   3  -2  11 1292.57   40.80
  -3  -2 -11 1272.37   35.60
   3   2  11 1306.37   32.60
   3   2  11 1371.06   35.10
  -3   2 -11 1299.37   36.20
  -4  -2 -11   36.40    5.00
  -4  -2 -11   38.10    4.60
   4  -2  11   42.10    4.40
  -4   2 -11   35.50    5.90
   4   2  11   40.50    3.50
   4   2  11   42.40    4.30
  -5  -2 -11  358.86   12.10
   5  -2  11  344.97   12.50
  -5  -2 -11  336.97   13.20
   5   2  11  333.57   10.10
   5   2  11  342.27   12.40
  -5   2 -11  342.17   14.50
  -6  -2 -11  216.28   10.40
  -6  -2 -11  215.38    9.30
   6  -2  11  217.28   10.50
   6   2  11  215.68    7.40
  -6   2 -11  214.88   12.00
  -7  -2 -11  261.57   11.40
  -7  -2 -11  273.17   10.50
   7  -2  11  257.97   12.40
  -7   2 -11  273.37   13.00
   7   2  11  252.37    8.50
   7   2  11  251.57   11.30
  -8  -2 -11   66.29    7.00
  -8  -2 -11   54.49    4.60
   8   2  11   58.99    9.20
   8   2  11   58.39    3.40
  -8   2 -11   67.29    9.60
  -9  -2 -11    9.90    3.00
   9  -2  11    9.10    2.40
   9   2  11    5.20    1.40
 -10  -2 -11    1.50    2.50
  10  -2  11    2.20    1.90
  10   2  11    2.20    1.20
  10  -3 -11  244.68    8.10
 -10  -3  11  243.08    8.20
  10   3 -11  238.28    7.40
   9  -3 -11  120.39    5.90
  -9  -3  11  117.89    6.00
   9   3 -11  108.99    5.10
   8  -3 -11    5.30    3.40
  -8  -3  11    7.80    2.60
   8   3 -11    7.20    3.00
  -8   3  11   -1.60    5.90
  -7  -3  11  171.98    7.70
  -7  -3  11  172.38    9.40
   7  -3 -11  164.58    9.00
   7   3 -11  157.68    7.80
   7   3 -11  164.38    8.00
  -7   3  11  163.98   19.90
  -6  -3  11   22.60    4.40
   6  -3 -11   17.70    3.70
  -6  -3  11   25.80    3.70
  -6   3  11   28.60    6.10
   6   3 -11   25.80    3.90
   6   3 -11   28.30    3.80
  -6   3  11   26.80    7.10
  -5  -3  11  308.27   12.90
   5  -3 -11  292.77   12.10
  -5  -3  11  318.87   11.20
   5  -3 -11  296.37   19.20
   5   3 -11  323.67   12.10
   5   3 -11  312.97   14.50
  -5   3  11  324.87   15.20
  -5   3  11  314.17   11.60
  -5   3  11  310.37   13.80
   4  -3 -11 1149.39   35.20
   4  -3 -11 1145.89   31.50
  -4  -3  11 1174.58   30.90
  -4  -3  11 1175.78   32.70
   4   3 -11 1184.68   31.90
  -4   3  11 1117.09   33.30
  -4   3  11 1134.79   30.90
   4   3 -11 1178.88   31.10
   3  -3 -11  423.46   14.80
  -3  -3  11  414.86   13.30
   3  -3 -11  407.26   17.90
   3   3 -11  407.76   15.10
  -3   3  11  410.56   16.90
  -3   3  11  447.36   22.20
   3   3 -11  422.56   16.70
  -3   3  11  422.86   13.40
   3   3 -11  411.36   13.80
  -2  -3  11   83.29    6.70
   2  -3 -11   80.39   10.70
   2   3 -11   92.79    8.70
  -2   3  11   82.39    8.40
  -2   3  11   77.89    7.30
   2   3 -11   85.19    7.80
   2   3 -11   98.49   10.40
   1  -3 -11  154.68   12.20
  -1  -3  11  158.88    9.10
  -1   3  11  168.48    6.80
   1   3 -11  156.68   10.30
  -1   3  11  183.98    8.80
  -1   3  11  167.58    8.80
   0  -3  11   16.50    5.00
   0  -3 -11    9.20    6.40
   0   3 -11   16.30    5.10
   0   3  11   17.90    3.50
   0   3  11   12.50    4.40
   0   3  11   14.60    2.70
   0   3  11   17.60    2.30
   1  -3  11  154.28   13.30
  -1  -3 -11  144.29   11.60
   1   3  11  169.38    5.90
   1   3  11  171.58    7.20
   1   3  11  165.58    7.70
   1   3  11  135.19   11.30
  -1   3 -11  160.78   11.00
   2  -3  11   90.79   13.20
  -2  -3 -11  102.09   11.80
  -2  -3 -11   83.89   11.00
  -2   3 -11  107.89   10.00
   2   3  11   87.59    5.10
   2   3  11   89.29    5.40
   2   3  11   82.59    4.10
  -3  -3 -11  404.76   15.20
  -3  -3 -11  386.66   17.60
   3   3  11  449.76   11.90
  -3   3 -11  416.86   16.20
   3   3  11  447.06   14.30
  -4  -3 -11 1129.99   34.50
  -4  -3 -11 1179.68   31.30
  -4  -3 -11 1190.58   32.40
   4   3  11 1148.49   29.50
   4   3  11 1188.78   32.60
  -4   3 -11 1189.58   33.40
   5  -3  11  325.57   12.70
  -5  -3 -11  288.97   14.60
  -5  -3 -11  335.07   11.70
   5   3  11  325.77   12.40
  -5   3 -11  340.67   14.90
   5   3  11  328.27    9.70
   6  -3  11   31.10    5.00
  -6  -3 -11   24.40    3.60
  -6  -3 -11   29.40    4.90
   6   3  11   33.50    3.20
   6   3  11   24.70    5.40
  -6   3 -11   27.20    6.70
  -7  -3 -11  171.88    8.30
  -7  -3 -11  166.38    9.10
   7  -3  11  169.78   12.00
   7   3  11  169.48    6.30
   7   3  11  149.19    9.10
  -8  -3 -11    3.90    2.10
  -8  -3 -11    5.00    3.70
   8   3  11    6.00    1.40
  -9  -3 -11  122.29    6.50
   9   3  11  121.79    4.50
 -10  -3 -11  238.58    8.50
  10   3  11  254.07    7.20
  10  -4 -11    4.60    2.00
 -10  -4  11    9.10    2.20
  10   4 -11    6.10    1.80
   9  -4 -11   23.80    2.70
  -9  -4  11   29.70    3.70
   9   4 -11   26.60    3.00
  -8  -4  11  398.86   11.80
  -8  -4  11  409.16   13.50
   8  -4 -11  426.66   14.10
  -8   4  11  398.26   15.00
   8   4 -11  418.16   13.00
  -7  -4  11   43.20    3.80
   7  -4 -11   24.70    4.00
  -7  -4  11   37.20    5.00
   7   4 -11   42.60    5.00
  -7   4  11   27.70    5.40
   7   4 -11   41.70    5.10
   6  -4 -11 1656.03   43.40
  -6  -4  11 1689.03   44.50
  -6  -4  11 1658.63   42.60
   6   4 -11 1606.44   42.70
   6   4 -11 1658.93   42.60
  -6   4  11 1634.64   46.10
   5  -4 -11  122.09    8.20
  -5  -4  11  134.29    7.00
   5  -4 -11  128.69   17.30
  -5  -4  11  126.49    8.90
   5   4 -11  132.59    7.30
   5   4 -11  128.09    7.70
  -5   4  11  135.59   11.00
   4  -4 -11  464.25   15.70
  -4  -4  11  471.65   16.70
   4  -4 -11  469.55   19.90
  -4  -4  11  495.95   15.00
  -4   4  11  467.95   17.90
   4   4 -11  470.25   15.70
  -4   4  11  470.25   15.30
   4   4 -11  482.45   15.00
  -3  -4  11  388.56   12.50
   3  -4 -11  380.96   16.80
   3  -4 -11  367.46   13.70
  -3  -4  11  377.06   14.40
  -3   4  11  367.86   14.90
   3   4 -11  391.66   12.80
  -3   4  11  351.66   16.70
  -3   4  11  368.46   12.50
   3   4 -11  380.56   13.80
  -2  -4  11   29.90    6.00
   2  -4 -11   26.50    6.50
   2  -4 -11   44.70    6.40
   2   4 -11   36.20    4.40
  -2   4  11   29.80    5.20
   2   4 -11   34.40    5.20
  -2   4  11   24.90    4.50
  -2   4  11   31.00    3.70
   1  -4 -11  659.43   22.20
  -1  -4  11  669.33   20.40
   1   4 -11  670.43   21.20
  -1   4  11  692.63   20.80
   1   4 -11  699.93   19.80
  -1   4  11  678.53   23.00
  -1   4  11  737.33   19.30
   0  -4 -11  176.58   11.20
   0   4 -11  194.08   10.30
   0   4  11  196.28    9.50
   0   4  11  200.38    7.20
   0   4 -11  194.78    9.70
   0   4  11  182.18    8.50
  -1  -4 -11  668.63   21.80
  -1   4 -11  656.43   21.20
   1   4  11  684.73   19.40
   1   4  11  701.23   18.40
   1   4  11  693.03   21.50
  -2  -4 -11   37.10    6.60
  -2  -4 -11   33.50    6.00
   2   4  11   29.80    4.50
   2   4  11   32.00    4.20
   2   4  11   42.10    3.30
  -2   4 -11   33.40    5.60
  -3  -4 -11  361.46   15.60
  -3  -4 -11  375.16   14.40
  -3   4 -11  396.36   15.60
   3   4  11  381.56   12.00
   3   4  11  386.16   13.80
   3   4  11  390.16   11.10
  -4  -4 -11  464.05   16.00
  -4  -4 -11  482.25   18.30
  -4  -4 -11  466.95   15.00
   4   4  11  475.25   16.30
  -4   4 -11  486.15   18.00
  -5  -4 -11  125.59    7.00
  -5  -4 -11  134.29    8.50
   5   4  11  133.49    5.30
  -5   4 -11  131.59   11.60
  -6  -4 -11 1662.43   42.80
  -6  -4 -11 1646.14   43.50
   6   4  11 1635.34   40.90
   6   4  11 1602.54   44.90
  -7  -4 -11   44.90    4.10
  -7  -4 -11   29.00    4.40
   7   4  11   37.00    2.70
   7   4  11   26.70    4.50
  -8  -4 -11  413.56   13.10
  -8  -4 -11  415.66   14.40
   8   4  11  423.96   11.70
  -9  -4 -11   36.20    4.10
 -10  -4 -11    5.60    2.10
  10   4  11    5.00    1.80
  10   4  11    3.70    1.40
   9  -5 -11   26.40    3.40
   9   5 -11   32.20    2.70
  -8  -5  11   50.09    4.50
   8  -5 -11   56.89    4.70
  -8  -5  11   52.89    4.40
  -8   5  11   51.39    7.70
   8   5 -11   57.59    3.80
  -7  -5  11   79.99    5.90
  -7  -5  11   82.99    4.50
   7  -5 -11   85.49    7.00
   7   5 -11   89.99    5.70
   7   5 -11   77.19    5.50
  -7   5  11   61.29    8.30
   6  -5 -11   36.40    4.70
  -6  -5  11   45.10    6.10
  -6   5  11   54.09    6.60
   6   5 -11   49.60    5.20
   6   5 -11   55.29    5.30
  -5  -5  11   46.30    5.20
   5  -5 -11   47.30    6.60
  -5  -5  11   50.89    7.10
  -5   5  11   48.60    7.00
   5   5 -11   44.60    5.50
   5   5 -11   52.59    5.30
   4  -5 -11   49.40    6.90
  -4  -5  11   60.39    7.70
   4  -5 -11   54.19    8.50
  -4  -5  11   51.69    5.20
   4   5 -11   62.49    5.60
   4   5 -11   47.60    6.00
  -4   5  11   58.99    8.60
  -3  -5  11  292.97   10.80
   3  -5 -11  310.57   15.10
   3  -5 -11  299.47   12.00
  -3  -5  11  279.97   12.70
   3   5 -11  301.27   11.30
  -3   5  11  298.97   11.50
   3   5 -11  326.57   13.20
  -3   5  11  292.27   13.30
  -3   5  11  287.77   16.10
  -2  -5  11  169.38    8.30
  -2  -5  11  172.28   10.90
   2  -5 -11  182.68   10.00
   2  -5 -11  168.38   11.90
  -2   5  11  171.08   11.80
   2   5 -11  173.18    8.00
  -2   5  11  170.78   10.20
  -2   5  11  178.38    8.20
   2   5 -11  172.88    9.50
   1  -5 -11 1015.60   30.00
  -1  -5  11 1004.10   28.10
  -1   5  11 1010.50   32.50
   1   5 -11 1048.40   27.60
  -1   5  11 1061.79   27.50
   1   5 -11 1042.60   29.20
  -1   5  11 1025.50   29.30
   0   5 -11 1341.57   34.00
   0   5  11 1251.67   38.00
   0   5  11 1296.57   33.50
   0   5  11 1277.97   35.00
   0   5 -11 1326.77   35.60
  -1  -5 -11 1004.70   29.50
  -1   5 -11 1014.40   29.20
  -1   5 -11 1018.50   27.60
   1   5  11 1025.60   28.10
   1   5  11 1038.20   26.80
   1   5  11 1048.30   31.00
  -2  -5 -11  158.88   12.50
  -2  -5 -11  173.08   10.60
   2   5  11  172.38    7.80
  -2   5 -11  203.38   10.80
   2   5  11  183.68    6.70
   2   5  11  176.58    9.30
  -3  -5 -11  293.57   13.20
  -3  -5 -11  288.47   12.70
   3   5  11  291.17    9.20
   3   5  11  291.97   10.40
   3   5  11  276.37   12.10
  -3   5 -11  289.77   13.10
  -4  -5 -11   48.40    6.60
  -4  -5 -11   58.29    7.30
   4   5  11   49.80    4.80
   4   5  11   53.99    3.80
  -4   5 -11   62.59    9.50
   4   5  11   50.89    6.10
  -5  -5 -11   49.40    6.80
  -5  -5 -11   47.70    5.50
  -5  -5 -11   52.39    7.60
   5   5  11   49.40    5.00
   5   5  11   51.09    3.70
   5   5  11   51.69    6.80
  -6  -5 -11   33.00    5.40
  -6  -5 -11   50.09    6.10
   6   5  11   38.80    7.40
  -7  -5 -11   77.29    5.10
  -7  -5 -11   73.09    6.90
   7   5  11   78.19    3.70
   7   5  11   80.69    4.50
  -8  -5 -11   52.79    4.60
   8   5  11   54.59    3.70
   8   5  11   50.19    3.00
  -9  -5 -11   27.60    3.60
   9   5  11   32.60    3.30
   9  -6 -11    7.60    2.00
  -9  -6  11    8.00    2.40
   9   6 -11    7.90    1.90
   8  -6 -11   14.30    2.40
  -8  -6  11   15.70    2.60
  -8   6  11   13.10    4.40
   8   6 -11   15.70    1.90
  -7  -6  11   46.80    3.40
  -7  -6  11   48.70    4.90
   7  -6 -11   37.60    5.00
  -7   6  11   54.19    7.20
   7   6 -11   38.10    3.50
  -6  -6  11  473.35   15.40
   6  -6 -11  500.05   15.80
  -6  -6  11  488.45   14.30
   6   6 -11  499.45   15.10
  -6   6  11  471.75   17.50
   6   6 -11  497.45   14.70
   5  -6 -11  321.07   11.90
  -5  -6  11  299.87   11.90
   5   6 -11  305.37   11.10
  -5   6  11  303.57   15.60
   5   6 -11  316.17   10.80
   4  -6 -11  293.47   15.60
   4  -6 -11  270.27   11.10
  -4  -6  11  287.97   12.60
  -4  -6  11  276.67   10.40
  -4   6  11  297.37   14.20
   4   6 -11  269.77   10.70
   4   6 -11  274.57   10.10
   3  -6 -11  485.55   18.60
  -3  -6  11  490.45   17.90
  -3  -6  11  516.95   15.60
   3  -6 -11  505.05   16.20
   3   6 -11  502.95   16.20
   3   6 -11  495.55   15.20
  -3   6  11  473.25   22.50
  -3   6  11  517.55   18.60
  -2  -6  11  734.43   21.20
   2  -6 -11  743.33   23.90
   2   6 -11  747.43   22.20
   2   6 -11  744.63   21.00
  -2   6  11  765.62   24.10
   1  -6 -11  209.68   11.30
  -1  -6  11  191.38    9.30
   1   6 -11  173.08   11.90
   1   6 -11  167.18    9.70
  -1   6  11  189.38    8.40
  -1   6  11  209.08   10.60
  -1   6  11  184.28   12.40
   0  -6 -11 2059.09   60.99
   0   6 -11 2273.87   57.69
   0   6  11 2291.97   55.79
   0   6  11 2289.67   57.79
[truncated: 175,493 more chars]
